# Supplementary material for: Transcriptome analysis reveals potential immune function-related regulatory genes/pathways of female Lubo goat submandibular glands at different developmental stages
Source: PeerJ. 2020 Oct 7;8:e9947. doi: 10.7717/peerj.9947 (PMC7547598; doi:10.7717/peerj.9947)
Supplement: Table S3 — A1-L, A2-L, A3-L were the samples for goats of 1-month-old (group A), B3-L, B4-L, B5-L were the samples for goats of 12-month-old (group B ) [file peerj-08-9947-s003.xlsx]

## Sheet: peerj-45161-Table_S4
id	A_count	B_count	A_fpkm	B_fpkm	log2(FC)	Pvalue	FDR	significant	Symbol	Description	KEGG_A_class	KEGG_B_class	Pathway	K_ID	GO Component	GO Function	GO Process
NM_001285538.1	612.833	38.9433	16.6867	0.796667	-4.38858	0.000131062	0.00410248	yes	ncbi_100861185	-	-	-	-	-	-	-	-
NM_001285545.1	1555.38	0	162.88	0.001	-17.3134	4.26518e-09	4.73509e-07	yes	ncbi_100861191	Bac7.5 protein precursor [Capra hircus]	Organismal Systems;Human Diseases	Digestive system;Infectious diseases	ko05152//Tuberculosis;ko04970//Salivary secretion	K13916	-	-	GO:0051704//multi-organism process;GO:0006950//response to stress;GO:0051707//response to other organism;GO:0050896//response to stimulus;GO:0009607//response to biotic stimulus;GO:0009605//response to external stimulus;GO:0009617//response to bacterium;GO:0043207//response to external biotic stimulus
NM_001285546.1	336.237	0	50.45	0.001	-15.6226	5.49714e-07	3.62381e-05	yes	ncbi_100861192	MAP28 protein precursor [Capra hircus]	Human Diseases;Organismal Systems	Infectious diseases;Digestive system	ko05152//Tuberculosis;ko04970//Salivary secretion	K13916	-	-	GO:0050896//response to stimulus;GO:0051707//response to other organism;GO:0001906//cell killing;GO:0009605//response to external stimulus;GO:0009607//response to biotic stimulus;GO:0043207//response to external biotic stimulus;GO:0006950//response to stress;GO:0009617//response to bacterium;GO:0051704//multi-organism process;GO:0009620//response to fungus
NM_001285577.1	372.323	0	46.6033	0.001	-15.5081	1.0186e-09	1.31766e-07	yes	ncbi_100861213	cathelicidin-2 precursor [Capra hircus]	Organismal Systems;Human Diseases	Digestive system;Infectious diseases	ko05152//Tuberculosis;ko04970//Salivary secretion	K13916	-	-	GO:0051707//response to other organism;GO:0009605//response to external stimulus;GO:0043207//response to external biotic stimulus;GO:0051704//multi-organism process;GO:0050896//response to stimulus;GO:0009607//response to biotic stimulus;GO:0009617//response to bacterium;GO:0006950//response to stress
NM_001285587.1	12.0267	1284.71	1.23333	78.83	5.99811	5.07483e-08	4.38075e-06	yes	ncbi_100861231	kappa-casein precursor [Capra hircus]	-	-	-	-	GO:0005576//extracellular region;GO:0044421//extracellular region part	-	GO:0044699//single-organism process;GO:1902578//single-organism localization;GO:0050878//regulation of body fluid levels;GO:0065008//regulation of biological quality;GO:0007589//body fluid secretion;GO:0031647//regulation of protein stability;GO:0046903//secretion;GO:0006810//transport;GO:0051234//establishment of localization;GO:0044765//single-organism transport;GO:0051179//localization;GO:0065…
NM_001285607.1	52.38	0.536667	3.04	0.02	-7.24793	0.00118401	0.0243226	yes	ncbi_100860750	-	-	-	-	-	-	-	-
NM_001285620.1	619.113	0	43.3167	0.001	-15.4026	1.281e-07	9.97723e-06	yes	ncbi_100861275	MAP34-B protein precursor [Capra hircus]	Organismal Systems;Human Diseases	Digestive system;Infectious diseases	ko05152//Tuberculosis;ko04970//Salivary secretion	K13916	-	-	GO:0009607//response to biotic stimulus;GO:0043207//response to external biotic stimulus;GO:0009617//response to bacterium;GO:0051704//multi-organism process;GO:0050896//response to stimulus;GO:0006950//response to stress;GO:0009605//response to external stimulus;GO:0051707//response to other organism
NM_001285628.1	549.27	116.267	14.62	2.16	-2.75884	8.93236e-05	0.00298162	yes	ncbi_100861282	elongation of very long chain fatty acids protein 5 [Capra hircus]	Metabolism	Lipid metabolism;Global and Overview	ko01212//Fatty acid metabolism;ko00062//Fatty acid elongation;ko01040//Biosynthesis of unsaturated fatty acids	K10244	GO:0043231//intracellular membrane-bounded organelle;GO:0031224//intrinsic component of membrane;GO:0044464//cell part;GO:0042995//cell projection;GO:0097458//neuron part;GO:0044297//cell body;GO:0016020//membrane;GO:0043005//neuron projection;GO:0043226//organelle;GO:0043227//membrane-bounded organelle;GO:0044425//membrane part;GO:0044424//intracellular part;GO:0005622//intracellular;GO:0005623/…	GO:0004312//fatty acid synthase activity;GO:0003824//catalytic activity;GO:0016746//transferase activity, transferring acyl groups;GO:0016747//transferase activity, transferring acyl groups other than amino-acyl groups;GO:0016740//transferase activity	GO:0043436//oxoacid metabolic process;GO:0006633//fatty acid biosynthetic process;GO:0019368//fatty acid elongation, unsaturated fatty acid;GO:0016053//organic acid biosynthetic process;GO:0071704//organic substance metabolic process;GO:0044699//single-organism process;GO:0000038//very long-chain fatty acid metabolic process;GO:0006082//organic acid metabolic process;GO:1901576//organic substance…
NM_001285660.1	291.677	25.9033	12.2033	0.816667	-3.90138	0.00123023	0.0250246	yes	ncbi_100861310	-	-	-	-	-	-	-	-
NM_001285662.1	964.113	239.817	81.2	13.6333	-2.57434	0.000233233	0.00655476	yes	ncbi_100860800	-	-	-	-	-	-	-	-
NM_001285677.2	996.847	303.857	113.533	26.0367	-2.1245	0.00137527	0.0272303	yes	ncbi_100861579	protein BTG1 [Bos taurus]	Genetic Information Processing	Folding, sorting and degradation	ko03018//RNA degradation	K14443	GO:0005623//cell;GO:0043231//intracellular membrane-bounded organelle;GO:0043226//organelle;GO:0044424//intracellular part;GO:0043227//membrane-bounded organelle;GO:0044464//cell part;GO:0043229//intracellular organelle;GO:0005622//intracellular	GO:0019899//enzyme binding;GO:0005488//binding;GO:0005515//protein binding	GO:0032501//multicellular organismal process;GO:0051674//localization of cell;GO:0032504//multicellular organism reproduction;GO:0007276//gamete generation;GO:0030858//positive regulation of epithelial cell differentiation;GO:0043067//regulation of programmed cell death;GO:0010033//response to organic substance;GO:0044763//single-organism cellular process;GO:0044267//cellular protein metabolic pr…
NM_001285721.1	639.263	100.943	45.3	4.41333	-3.35957	0.000409045	0.0104256	yes	ncbi_100860873	C-X-C motif chemokine 10 precursor [Capra hircus]	Human Diseases;Organismal Systems;Environmental Information Processing	Immune system;Signaling molecules and interaction;Signal transduction;Infectious diseases	ko04060//Cytokine-cytokine receptor interaction;ko04062//Chemokine signaling pathway;ko05164//Influenza A;ko04668//TNF signaling pathway;ko04620//Toll-like receptor signaling pathway;ko04622//RIG-I-like receptor signaling pathway;ko04623//Cytosolic DNA-sensing pathway	K12671	-	-	-
NM_001285726.1	546.833	23.2	33.5433	1.15333	-4.86214	1.81232e-07	1.36857e-05	yes	ncbi_100861389	signaling lymphocytic activation molecule precursor [Capra hircus]	Human Diseases	Infectious diseases	ko05162//Measles	K06536	GO:0071944//cell periphery;GO:0043229//intracellular organelle;GO:0044459//plasma membrane part;GO:0044444//cytoplasmic part;GO:0005886//plasma membrane;GO:0031410//cytoplasmic vesicle;GO:0016023//cytoplasmic, membrane-bounded vesicle;GO:0031982//vesicle;GO:0044464//cell part;GO:0043227//membrane-bounded organelle;GO:0005737//cytoplasm;GO:0044424//intracellular part;GO:0031224//intrinsic componen…	-	GO:0051128//regulation of cellular component organization;GO:0065007//biological regulation;GO:0001775//cell activation;GO:0044699//single-organism process;GO:0044763//single-organism cellular process;GO:0050789//regulation of biological process;GO:0002376//immune system process;GO:0009987//cellular process;GO:0033043//regulation of organelle organization;GO:0019222//regulation of metabolic proce…
NM_001285741.1	1276.45	51.3267	55.95	1.78	-4.97419	6.81031e-09	7.21942e-07	yes	ncbi_100860892	solute carrier family 2, facilitated glucose transporter member 3 [Ovis aries]	-	-	-	-	GO:0044464//cell part;GO:0005622//intracellular;GO:0031224//intrinsic component of membrane;GO:0044424//intracellular part;GO:0044425//membrane part;GO:0016020//membrane;GO:0005623//cell	GO:0051183//vitamin transporter activity;GO:0015144//carbohydrate transmembrane transporter activity;GO:0022857//transmembrane transporter activity;GO:0015149//hexose transmembrane transporter activity;GO:1901476//carbohydrate transporter activity;GO:0022891//substrate-specific transmembrane transporter activity;GO:0005215//transporter activity;GO:0022892//substrate-specific transporter activity;…	GO:0015711//organic anion transport;GO:1902578//single-organism localization;GO:0051234//establishment of localization;GO:0008643//carbohydrate transport;GO:0006810//transport;GO:0015749//monosaccharide transport;GO:0044763//single-organism cellular process;GO:0006811//ion transport;GO:0006820//anion transport;GO:0009987//cellular process;GO:0071702//organic substance transport;GO:0008645//hexose…
NM_001285746.1	1991.99	8.06333	109.783	0.366667	-8.22597	2.28449e-15	1.39664e-12	yes	ncbi_100860901	-	-	-	-	-	-	-	-
NM_001285765.1	885.7	295.08	37.49	8.36667	-2.16378	0.000705498	0.0160823	yes	ncbi_100861171	matrix metalloproteinase-14 precursor [Ovis aries]	Organismal Systems;Environmental Information Processing	Endocrine system;Signal transduction	ko04668//TNF signaling pathway;ko04912//GnRH signaling pathway	K07763	GO:0016020//membrane;GO:0005737//cytoplasm;GO:0044464//cell part;GO:0070161//anchoring junction;GO:0044425//membrane part;GO:0044424//intracellular part;GO:0016023//cytoplasmic, membrane-bounded vesicle;GO:0005912//adherens junction;GO:0031410//cytoplasmic vesicle;GO:0043226//organelle;GO:0005623//cell;GO:0030055//cell-substrate junction;GO:0031982//vesicle;GO:0048770//pigment granule;GO:0044444/…	GO:0043167//ion binding;GO:0005488//binding;GO:0016787//hydrolase activity;GO:0001071//nucleic acid binding transcription factor activity;GO:0004175//endopeptidase activity;GO:0046872//metal ion binding;GO:0008233//peptidase activity;GO:0070011//peptidase activity, acting on L-amino acid peptides;GO:0043169//cation binding;GO:0046914//transition metal ion binding;GO:0003824//catalytic activity	GO:0019538//protein metabolic process;GO:0043170//macromolecule metabolic process;GO:0007275//multicellular organism development;GO:0001503//ossification;GO:0008152//metabolic process;GO:0044259//multicellular organismal macromolecule metabolic process;GO:0060255//regulation of macromolecule metabolic process;GO:0001501//skeletal system development;GO:0032502//developmental process;GO:0048598//em…
NM_001285769.1	3867.5	201.617	110.96	4.58333	-4.5975	1.58207e-09	1.93442e-07	yes	ncbi_100860919	-	-	-	-	-	-	-	-
NM_001291297.1	262.34	45.1533	2.86	0.35	-3.03059	0.000417407	0.0105663	yes	ncbi_102183389	retrotransposon-derived protein PEG10 isoform 3 [Capra hircus]	-	-	-	-	-	GO:0043169//cation binding;GO:0043167//ion binding;GO:0046914//transition metal ion binding;GO:0005488//binding;GO:0046872//metal ion binding	-
NM_001291298.1	262.34	45.1533	2.86	0.35	-3.03059	0.000417347	0.0105663	yes	ncbi_102183389	-	-	-	-	-	-	-	-
NM_001291299.1	967.58	217.73	10.2633	1.69333	-2.59956	8.27266e-05	0.00279221	yes	ncbi_102183389	-	-	-	-	-	-	-	-
NM_001291300.1	967.58	217.73	10.2633	1.69333	-2.59956	8.27735e-05	0.00279221	yes	ncbi_102183389	-	-	-	-	-	-	-	-
NM_001314142.1	386.163	85.4067	22.5	3.75667	-2.5824	0.00165549	0.0313994	yes	ncbi_102191364	-	-	-	-	-	-	-	-
NM_001314163.1	479.067	57.5767	30.42	2.8	-3.44152	2.16789e-05	0.000900257	yes	ncbi_102170638	pro-cathepsin H precursor [Capra hircus]	Cellular Processes	Transport and catabolism	ko04142//Lysosome	K01366	GO:0005623//cell;GO:0043229//intracellular organelle;GO:0000323//lytic vacuole;GO:0044464//cell part;GO:0005576//extracellular region;GO:0005622//intracellular;GO:0012505//endomembrane system;GO:0043231//intracellular membrane-bounded organelle;GO:0030141//secretory granule;GO:0099503//secretory vesicle;GO:0005773//vacuole;GO:0005737//cytoplasm;GO:0043226//organelle;GO:0043227//membrane-bounded o…	GO:0070011//peptidase activity, acting on L-amino acid peptides;GO:0042562//hormone binding;GO:0005488//binding;GO:0030234//enzyme regulator activity;GO:0060089//molecular transducer activity;GO:0038023//signaling receptor activity;GO:0061134//peptidase regulator activity;GO:0003824//catalytic activity;GO:0098772//molecular function regulator;GO:0032393//MHC class I receptor activity;GO:0099600//…	GO:0045862//positive regulation of proteolysis;GO:0023056//positive regulation of signaling;GO:0019222//regulation of metabolic process;GO:0043281//regulation of cysteine-type endopeptidase activity involved in apoptotic process;GO:0043068//positive regulation of programmed cell death;GO:0080090//regulation of primary metabolic process;GO:0030334//regulation of cell migration;GO:1901565//organoni…
NM_001314219.1	403.733	40.03	32.03	1.98333	-4.01342	1.81149e-05	0.000772897	yes	ncbi_102174541	insulin-like growth factor-binding protein 3 precursor [Capra hircus]	Cellular Processes;Human Diseases	Cancers;Cell growth and death	ko05202//Transcriptional misregulation in cancers;ko04115//p53 signaling pathway	K10138	-	-	-
NM_001314269.1	219.76	4.38667	7.13667	0.0966667	-6.20609	2.38034e-06	0.000131313	yes	ncbi_102168469	PREDICTED: matrix metalloproteinase-9 [Ovis aries musimon]	Environmental Information Processing;Organismal Systems;Human Diseases	Cancers;Infectious diseases;Signal transduction;Immune system;Endocrine system	ko05200//Pathways in cancer;ko05205//Proteoglycans in cancer;ko04670//Leukocyte transendothelial migration;ko05202//Transcriptional misregulation in cancers;ko04668//TNF signaling pathway;ko05161//Hepatitis B;ko04915//Estrogen signaling pathway;ko05206//MicroRNAs in cancer;ko05219//Bladder cancer	K01403	GO:0031988//membrane-bounded vesicle;GO:0043226//organelle;GO:0031982//vesicle;GO:0043227//membrane-bounded organelle;GO:0031012//extracellular matrix;GO:0044421//extracellular region part;GO:0005576//extracellular region	GO:0016787//hydrolase activity;GO:0005488//binding;GO:0043169//cation binding;GO:0005515//protein binding;GO:0003824//catalytic activity;GO:0046872//metal ion binding;GO:0046914//transition metal ion binding;GO:0070011//peptidase activity, acting on L-amino acid peptides;GO:0004175//endopeptidase activity;GO:0043167//ion binding;GO:0008233//peptidase activity	GO:2000145//regulation of cell motility;GO:0010632//regulation of epithelial cell migration;GO:0032412//regulation of ion transmembrane transporter activity;GO:0032410//negative regulation of transporter activity;GO:0044092//negative regulation of molecular function;GO:0065009//regulation of molecular function;GO:0044707//single-multicellular organism process;GO:0032501//multicellular organismal …
NM_001314287.1	233.13	10.8467	13.77	0.503333	-4.77387	0.000209341	0.0059774	yes	ncbi_102187190	aldoketoreductase 1B5 [Capra hircus]	Metabolism	Lipid metabolism;Carbohydrate metabolism	ko00561//Glycerolipid metabolism;ko00051//Fructose and mannose metabolism;ko00040//Pentose and glucuronate interconversions;ko00052//Galactose metabolism	K00011	GO:0005623//cell;GO:0044464//cell part;GO:0005622//intracellular;GO:0044424//intracellular part	GO:0033764//steroid dehydrogenase activity, acting on the CH-OH group of donors, NAD or NADP as acceptor;GO:0004033//aldo-keto reductase (NADP) activity;GO:0008106//alcohol dehydrogenase (NADP+) activity;GO:0016229//steroid dehydrogenase activity;GO:0016491//oxidoreductase activity;GO:0016614//oxidoreductase activity, acting on CH-OH group of donors;GO:0003824//catalytic activity;GO:0016616//oxid…	GO:0044699//single-organism process;GO:0008152//metabolic process;GO:0044710//single-organism metabolic process
NM_001314289.1	92.2967	4.73667	6.09	0.2	-4.92837	0.00106766	0.0223862	yes	ncbi_102184119	indoleamine 2,3-dioxygenase 1 [Capra hircus]	Human Diseases;Metabolism	Infectious diseases;Amino acid metabolism	ko00380//Tryptophan metabolism;ko05143//African trypanosomiasis	K00463	GO:0043226//organelle;GO:0005623//cell;GO:0005737//cytoplasm;GO:0043229//intracellular organelle;GO:0044444//cytoplasmic part;GO:0044464//cell part;GO:0044424//intracellular part;GO:0043292//contractile fiber;GO:0005622//intracellular;GO:0043232//intracellular non-membrane-bounded organelle;GO:0043228//non-membrane-bounded organelle	GO:0016491//oxidoreductase activity;GO:0097159//organic cyclic compound binding;GO:0051213//dioxygenase activity;GO:1901363//heterocyclic compound binding;GO:0003824//catalytic activity;GO:0005488//binding;GO:0046906//tetrapyrrole binding;GO:0016701//oxidoreductase activity, acting on single donors with incorporation of molecular oxygen;GO:0016702//oxidoreductase activity, acting on single donors…	GO:0050789//regulation of biological process;GO:0044282//small molecule catabolic process;GO:0051704//multi-organism process;GO:0051240//positive regulation of multicellular organismal process;GO:0009987//cellular process;GO:0051241//negative regulation of multicellular organismal process;GO:0009074//aromatic amino acid family catabolic process;GO:0034111//negative regulation of homotypic cell-ce…
NM_001314316.1	299.283	21.6167	5.44	0.313333	-4.11784	2.7171e-05	0.00109318	yes	ncbi_102172115	integrin alpha-L precursor [Capra hircus]	Organismal Systems;Environmental Information Processing;Cellular Processes;Human Diseases	Signaling molecules and interaction;Signal transduction;Infectious diseases;Cardiovascular diseases;Immune diseases;Cell motility;Immune system	ko04810//Regulation of actin cytoskeleton;ko04015//Rap1 signaling pathway;ko04514//Cell adhesion molecules (CAMs);ko05166//HTLV-I infection;ko04650//Natural killer cell mediated cytotoxicity;ko05169//Epstein-Barr virus infection;ko04670//Leukocyte transendothelial migration;ko05323//Rheumatoid arthritis;ko05416//Viral myocarditis;ko05150//Staphylococcus aureus infection;ko05144//Malaria	K05718	GO:0098797//plasma membrane protein complex;GO:0005886//plasma membrane;GO:0031226//intrinsic component of plasma membrane;GO:0031982//vesicle;GO:0031224//intrinsic component of membrane;GO:0043234//protein complex;GO:0098802//plasma membrane receptor complex;GO:0005623//cell;GO:0043226//organelle;GO:0043227//membrane-bounded organelle;GO:0008305//integrin complex;GO:0030054//cell junction;GO:003…	GO:0099600//transmembrane receptor activity;GO:0004888//transmembrane signaling receptor activity;GO:0004871//signal transducer activity;GO:0005488//binding;GO:0004872//receptor activity;GO:0043167//ion binding;GO:0060089//molecular transducer activity;GO:0038023//signaling receptor activity;GO:0005515//protein binding;GO:0043169//cation binding	GO:0042129//regulation of T cell proliferation;GO:0072657//protein localization to membrane;GO:0044802//single-organism membrane organization;GO:0050789//regulation of biological process;GO:0044699//single-organism process;GO:0050794//regulation of cellular process;GO:0002285//lymphocyte activation involved in immune response;GO:0071840//cellular component organization or biogenesis;GO:0050865//r…
NM_001314325.1	71.5633	0	1.81	0.001	-10.8218	0.000602539	0.0142354	yes	ncbi_102170590	forkhead box protein M1 [Capra hircus]	-	-	-	-	-	-	-
NM_001314342.1	17232	5134.79	1022.28	231.347	-2.14366	0.000763713	0.0171447	yes	ncbi_102179831	-	-	-	-	-	-	-	-
TCONS_00000084	647.937	150.173	4.24667	0.686667	-2.62865	6.00464e-05	0.00214729	yes	TIAM1	XP_014962636.1 PREDICTED: T-lymphoma invasion and metastasis-inducing protein 1 isoform X4 [Ovis aries musimon]	Organismal Systems;Cellular Processes;Environmental Information Processing	Immune system;Signal transduction;Cell motility	ko04014//Ras signaling pathway;ko04810//Regulation of actin cytoskeleton;ko04015//Rap1 signaling pathway;ko04024//cAMP signaling pathway;ko04062//Chemokine signaling pathway	K05731	GO:0044425//membrane part;GO:0005886//plasma membrane;GO:0005911//cell-cell junction;GO:0016020//membrane;GO:0044464//cell part;GO:0019897//extrinsic component of plasma membrane;GO:0019898//extrinsic component of membrane;GO:0044459//plasma membrane part;GO:0030054//cell junction;GO:0005623//cell;GO:0071944//cell periphery	GO:0005102//receptor binding;GO:0005085//guanyl-nucleotide exchange factor activity;GO:0005088//Ras guanyl-nucleotide exchange factor activity;GO:0005515//protein binding;GO:0098772//molecular function regulator;GO:0005089//Rho guanyl-nucleotide exchange factor activity;GO:0008289//lipid binding;GO:0005488//binding	GO:0050790//regulation of catalytic activity;GO:0045595//regulation of cell differentiation;GO:0031589//cell-substrate adhesion;GO:0006928//movement of cell or subcellular component;GO:0050794//regulation of cellular process;GO:0010769//regulation of cell morphogenesis involved in differentiation;GO:0007155//cell adhesion;GO:0044763//single-organism cellular process;GO:0010720//positive regulatio…
TCONS_00000202	411.373	0	2.62667	0.001	-11.359	5.72789e-16	4.19066e-13	yes	CFDP2	KHJ39844.1 endonuclease/exonuclease/phosphatase family protein [Trichuris suis]	-	-	-	-	-	-	-
TCONS_00002173	63.31	0	1.13333	0.001	-10.1464	6.71848e-05	0.0023628	yes	CCDC14	XP_005675099.2 PREDICTED: coiled-coil domain-containing protein 14 [Capra hircus]	-	-	-	-	-	-	GO:0048856//anatomical structure development;GO:0032502//developmental process
TCONS_00002388	270.323	26.4633	5.36333	0.403333	-3.73309	0.00287727	0.0480036	yes	ST6GAL1	NP_001272589.1 beta-galactoside alpha-2,6-sialyltransferase 1 [Capra hircus]	Metabolism	Glycan biosynthesis and metabolism;Global and Overview	ko01100//Metabolic pathways;ko00510//N-Glycan biosynthesis;ko00514//Other types of O-glycan biosynthesis	K00778	GO:0000139//Golgi membrane;GO:0044422//organelle part;GO:0005622//intracellular;GO:0044425//membrane part;GO:0044446//intracellular organelle part;GO:0031090//organelle membrane;GO:0031228//intrinsic component of Golgi membrane;GO:0031982//vesicle;GO:0098588//bounding membrane of organelle;GO:0043226//organelle;GO:0043227//membrane-bounded organelle;GO:0005623//cell;GO:0044431//Golgi apparatus pa…	GO:0003824//catalytic activity;GO:0016740//transferase activity;GO:0016757//transferase activity, transferring glycosyl groups	GO:0019538//protein metabolic process;GO:0009059//macromolecule biosynthetic process;GO:0044763//single-organism cellular process;GO:0006464//cellular protein modification process;GO:0044723//single-organism carbohydrate metabolic process;GO:1901576//organic substance biosynthetic process;GO:0006487//protein N-linked glycosylation;GO:0034645//cellular macromolecule biosynthetic process;GO:0071704…
TCONS_00002609	0.6	420.657	0.00333333	2.00667	9.23362	0.000550811	0.0132805	yes	NAALADL2	XP_005675353.2 PREDICTED: inactive N-acetylated-alpha-linked acidic dipeptidase-like protein 2 isoform X1 [Capra hircus]	-	-	-	-	-	-	-
TCONS_00003000	633.483	18.7867	8.24	0.19	-5.43857	4.78007e-09	5.22867e-07	yes	IL20RB	XP_005675586.1 PREDICTED: interleukin-20 receptor subunit beta isoform X1 [Capra hircus]	Environmental Information Processing	Signaling molecules and interaction;Signal transduction	ko04060//Cytokine-cytokine receptor interaction;ko04630//Jak-STAT signaling pathway	K05137	-	GO:0005515//protein binding;GO:0005488//binding;GO:0019955//cytokine binding	GO:0006950//response to stress;GO:0048518//positive regulation of biological process;GO:0023052//signaling;GO:0001894//tissue homeostasis;GO:0002694//regulation of leukocyte activation;GO:0032944//regulation of mononuclear cell proliferation;GO:0034110//regulation of homotypic cell-cell adhesion;GO:0048519//negative regulation of biological process;GO:0050896//response to stimulus;GO:0060249//ana…
TCONS_00003048	93.8633	1.44	9.23333	0.11	-6.39128	0.000110791	0.0035934	yes	BFSP2	XP_019817862.1 PREDICTED: phakinin isoform X2 [Bos indicus]	-	-	-	-	GO:0043234//protein complex;GO:0044464//cell part;GO:0043232//intracellular non-membrane-bounded organelle;GO:0005623//cell;GO:0043229//intracellular organelle;GO:0043226//organelle;GO:0044424//intracellular part;GO:0043228//non-membrane-bounded organelle;GO:0032991//macromolecular complex;GO:0005622//intracellular;GO:0016020//membrane	GO:0005198//structural molecule activity	GO:0060429//epithelium development;GO:0032502//developmental process;GO:0044767//single-organism developmental process;GO:0048468//cell development;GO:0007010//cytoskeleton organization;GO:0009888//tissue development;GO:0009987//cellular process;GO:0044763//single-organism cellular process;GO:0016043//cellular component organization;GO:0048856//anatomical structure development;GO:0021700//develop…
TCONS_00003096	50.7033	0	0.74	0.001	-9.53138	0.000625121	0.0146372	yes	DSCAM	XP_017907105.1 PREDICTED: Down syndrome cell adhesion molecule [Capra hircus]	-	-	-	-	GO:0043005//neuron projection;GO:0005623//cell;GO:0097458//neuron part;GO:0042995//cell projection;GO:0044464//cell part	-	GO:0045927//positive regulation of growth;GO:0048666//neuron development;GO:0031344//regulation of cell projection organization;GO:0010976//positive regulation of neuron projection development;GO:0048639//positive regulation of developmental growth;GO:0032535//regulation of cellular component size;GO:0051094//positive regulation of developmental process;GO:0050789//regulation of biological proces…
TCONS_00003098	39.1433	0.333333	0.693333	0.00333333	-7.70044	0.00276097	0.0466228	yes	DSCAM	XP_006077002.1 PREDICTED: Down syndrome cell adhesion molecule [Bubalus bubalis]	-	-	-	-	GO:0042995//cell projection;GO:0043005//neuron projection;GO:0097458//neuron part;GO:0044464//cell part;GO:0005623//cell	-	GO:0051239//regulation of multicellular organismal process;GO:0051128//regulation of cellular component organization;GO:0048468//cell development;GO:0009791//post-embryonic development;GO:0030154//cell differentiation;GO:0050793//regulation of developmental process;GO:0071840//cellular component organization or biogenesis;GO:0050789//regulation of biological process;GO:0050769//positive regulatio…
TCONS_00003207	435.29	15.0967	7.04	0.19	-5.2115	5.39276e-08	4.58426e-06	yes	ITGB2	XP_017903465.1 PREDICTED: integrin beta-2 isoform X1 [Capra hircus]	Cellular Processes;Environmental Information Processing;Organismal Systems	Transport and catabolism;Immune system;Cell motility;Signal transduction;Signaling molecules and interaction	ko04810//Regulation of actin cytoskeleton;ko04015//Rap1 signaling pathway;ko04514//Cell adhesion molecules (CAMs);ko04650//Natural killer cell mediated cytotoxicity;ko04390//Hippo signaling pathway;ko04145//Phagosome;ko04670//Leukocyte transendothelial migration	K06464	GO:0071944//cell periphery;GO:0043227//membrane-bounded organelle;GO:0016020//membrane;GO:0044459//plasma membrane part;GO:0043235//receptor complex;GO:0098802//plasma membrane receptor complex;GO:0032991//macromolecular complex;GO:0043226//organelle;GO:0044425//membrane part;GO:0098796//membrane protein complex;GO:0031988//membrane-bounded vesicle;GO:0008305//integrin complex;GO:0098797//plasma …	GO:0043169//cation binding;GO:0060089//molecular transducer activity;GO:0099600//transmembrane receptor activity;GO:0005515//protein binding;GO:0038023//signaling receptor activity;GO:0004871//signal transducer activity;GO:0004872//receptor activity;GO:0005488//binding;GO:0004888//transmembrane signaling receptor activity;GO:0019900//kinase binding;GO:0019899//enzyme binding;GO:0043167//ion bindi…	GO:0051179//localization;GO:0040011//locomotion;GO:0051716//cellular response to stimulus;GO:0016477//cell migration;GO:0007154//cell communication;GO:0031399//regulation of protein modification process;GO:0050789//regulation of biological process;GO:0034613//cellular protein localization;GO:0071621//granulocyte chemotaxis;GO:0044707//single-multicellular organism process;GO:0044802//single-organ…
TCONS_00003244	1664.23	10.2433	14.9467	0.0766667	-7.60701	6.8379e-12	1.57304e-09	yes	RUNX1	XP_011986058.1 PREDICTED: runt-related transcription factor 1 isoform X2 [Ovis aries musimon]	-	-	-	-	-	-	-
TCONS_00003359	33.92	0	0.423333	0.001	-8.72565	0.00252341	0.0435657	yes	KCNJ6	XP_007966108.1 PREDICTED: G protein-activated inward rectifier potassium channel 2 isoform X1 [Chlorocebus sabaeus]	Organismal Systems	Environmental adaptation;Nervous system;Endocrine system	ko04921//Oxytocin signaling pathway;ko04728//Dopaminergic synapse;ko04726//Serotonergic synapse;ko04725//Cholinergic synapse;ko04713//Circadian entrainment;ko04723//Retrograde endocannabinoid signaling;ko04727//GABAergic synapse;ko04915//Estrogen signaling pathway	K05000	-	-	-
TCONS_00003422	1006.11	26.8433	30.7733	0.663333	-5.5358	0.000376474	0.00977977	yes	SATB1	XP_012009567.1 PREDICTED: DNA-binding protein SATB1 isoform X3 [Ovis aries musimon]	-	-	-	-	GO:0070013//intracellular organelle lumen;GO:0005654//nucleoplasm;GO:0031974//membrane-enclosed lumen;GO:0032991//macromolecular complex;GO:0043231//intracellular membrane-bounded organelle;GO:0031981//nuclear lumen;GO:0043232//intracellular non-membrane-bounded organelle;GO:0043228//non-membrane-bounded organelle;GO:0043227//membrane-bounded organelle;GO:0044427//chromosomal part;GO:0000785//chr…	GO:0005488//binding;GO:0097159//organic cyclic compound binding;GO:0003676//nucleic acid binding;GO:0044212//transcription regulatory region DNA binding;GO:0003700//transcription factor activity, sequence-specific DNA binding;GO:1990837//sequence-specific double-stranded DNA binding;GO:0043565//sequence-specific DNA binding;GO:0001067//regulatory region nucleic acid binding;GO:0000976//transcript…	GO:0012501//programmed cell death;GO:0044260//cellular macromolecule metabolic process;GO:0036211//protein modification process;GO:0044267//cellular protein metabolic process;GO:0019219//regulation of nucleobase-containing compound metabolic process;GO:0010556//regulation of macromolecule biosynthetic process;GO:0006357//regulation of transcription from RNA polymerase II promoter;GO:0051171//regu…
TCONS_00003424	3253.59	519.34	93.9	12.9	-2.86375	0.00110402	0.0230025	yes	SATB1	XP_012009567.1 PREDICTED: DNA-binding protein SATB1 isoform X3 [Ovis aries musimon]	-	-	-	-	GO:0043232//intracellular non-membrane-bounded organelle;GO:0044454//nuclear chromosome part;GO:0005623//cell;GO:0070013//intracellular organelle lumen;GO:0043233//organelle lumen;GO:0005654//nucleoplasm;GO:0044427//chromosomal part;GO:0044451//nucleoplasm part;GO:0000790//nuclear chromatin;GO:0044446//intracellular organelle part;GO:0016604//nuclear body;GO:0044428//nuclear part;GO:0043226//orga…	GO:0003700//transcription factor activity, sequence-specific DNA binding;GO:0043565//sequence-specific DNA binding;GO:0000975//regulatory region DNA binding;GO:0000981//RNA polymerase II transcription factor activity, sequence-specific DNA binding;GO:0001071//nucleic acid binding transcription factor activity;GO:0001067//regulatory region nucleic acid binding;GO:0000976//transcription regulatory …	GO:0016568//chromatin modification;GO:0036037//CD8-positive, alpha-beta T cell activation;GO:0006464//cellular protein modification process;GO:0019222//regulation of metabolic process;GO:0098602//single organism cell adhesion;GO:2001141//regulation of RNA biosynthetic process;GO:0071593//lymphocyte aggregation;GO:0012501//programmed cell death;GO:0042098//T cell proliferation;GO:0044710//single-o…
TCONS_00003430	294.877	11.3667	11.9667	0.363333	-5.04158	0.000122905	0.00389847	yes	SATB1	XP_005977279.1 PREDICTED: DNA-binding protein SATB1 [Pantholops hodgsonii]	-	-	-	-	GO:0043233//organelle lumen;GO:0005654//nucleoplasm;GO:0043231//intracellular membrane-bounded organelle;GO:0005622//intracellular;GO:0070013//intracellular organelle lumen;GO:0043229//intracellular organelle;GO:0031974//membrane-enclosed lumen;GO:0043228//non-membrane-bounded organelle;GO:0032991//macromolecular complex;GO:0044424//intracellular part;GO:0043232//intracellular non-membrane-bounde…	GO:1901363//heterocyclic compound binding;GO:0000976//transcription regulatory region sequence-specific DNA binding;GO:0005488//binding;GO:0001067//regulatory region nucleic acid binding;GO:0003700//transcription factor activity, sequence-specific DNA binding;GO:0097159//organic cyclic compound binding;GO:0001071//nucleic acid binding transcription factor activity;GO:0000975//regulatory region DN…	GO:0044267//cellular protein metabolic process;GO:0070489//T cell aggregation;GO:0035710//CD4-positive, alpha-beta T cell activation;GO:0022610//biological adhesion;GO:0008219//cell death;GO:0009987//cellular process;GO:0071593//lymphocyte aggregation;GO:0010468//regulation of gene expression;GO:0070486//leukocyte aggregation;GO:0051252//regulation of RNA metabolic process;GO:0046649//lymphocyte …
TCONS_00003516	31.07	0	0.863333	0.001	-9.75377	0.00274205	0.0463894	yes	PADI6	XP_017910198.1 PREDICTED: protein-arginine deiminase type-6 [Capra hircus]	-	-	-	-	GO:0043228//non-membrane-bounded organelle;GO:0044464//cell part;GO:0005623//cell;GO:0043229//intracellular organelle;GO:0043226//organelle;GO:0005856//cytoskeleton;GO:0044424//intracellular part;GO:0043232//intracellular non-membrane-bounded organelle;GO:0005622//intracellular	GO:0043167//ion binding;GO:0043169//cation binding;GO:0046872//metal ion binding;GO:0005488//binding	GO:0044260//cellular macromolecule metabolic process;GO:0044237//cellular metabolic process;GO:0080090//regulation of primary metabolic process;GO:0060255//regulation of macromolecule metabolic process;GO:0043170//macromolecule metabolic process;GO:0016043//cellular component organization;GO:0071840//cellular component organization or biogenesis;GO:0043412//macromolecule modification;GO:0034248//…
TCONS_00003647	151.613	0.883333	1.60667	0.00666667	-7.91289	1.68576e-05	0.000725315	yes	Grhl3	XP_005676903.1 PREDICTED: grainyhead-like protein 3 homolog [Capra hircus]	-	-	-	-	GO:0043229//intracellular organelle;GO:0044424//intracellular part;GO:0043231//intracellular membrane-bounded organelle;GO:0005622//intracellular;GO:0043226//organelle;GO:0005623//cell;GO:0044464//cell part;GO:0043227//membrane-bounded organelle	GO:0097159//organic cyclic compound binding;GO:0005488//binding;GO:0003676//nucleic acid binding;GO:1901363//heterocyclic compound binding	GO:2001141//regulation of RNA biosynthetic process;GO:0010556//regulation of macromolecule biosynthetic process;GO:0009987//cellular process;GO:0050789//regulation of biological process;GO:0006950//response to stress;GO:0001654//eye development;GO:0044700//single organism signaling;GO:0009653//anatomical structure morphogenesis;GO:0006355//regulation of transcription, DNA-templated;GO:0048513//an…
TCONS_00003732	7232.29	1909.31	65.8167	13.64	-2.27061	0.000610496	0.0143777	yes	ARID1A	XP_017911963.1 PREDICTED: AT-rich interactive domain-containing protein 1A isoform X1 [Capra hircus]	-	-	-	-	GO:0005634//nucleus;GO:0044427//chromosomal part;GO:0043228//non-membrane-bounded organelle;GO:0005623//cell;GO:0043226//organelle;GO:0044422//organelle part;GO:0043234//protein complex;GO:0000785//chromatin;GO:0090544//BAF-type complex;GO:0044428//nuclear part;GO:0044424//intracellular part;GO:0043229//intracellular organelle;GO:0032991//macromolecular complex;GO:0044446//intracellular organelle…	GO:0003682//chromatin binding;GO:0044877//macromolecular complex binding;GO:0005102//receptor binding;GO:0003676//nucleic acid binding;GO:0005515//protein binding;GO:1901363//heterocyclic compound binding;GO:0097159//organic cyclic compound binding;GO:0005488//binding	GO:0071822//protein complex subunit organization;GO:0071824//protein-DNA complex subunit organization;GO:0071495//cellular response to endogenous stimulus;GO:0035148//tube formation;GO:0043933//macromolecular complex subunit organization;GO:0006325//chromatin organization;GO:0044699//single-organism process;GO:0010468//regulation of gene expression;GO:0048545//response to steroid hormone;GO:00512…
TCONS_00003959	164.857	8.58	1.34	0.05	-4.74416	0.00065725	0.015206	yes	GPR55	XP_017913805.1 PREDICTED: G-protein coupled receptor 55 [Capra hircus]	-	-	-	-	GO:0016021//integral component of membrane;GO:0044425//membrane part;GO:0031224//intrinsic component of membrane;GO:0016020//membrane	GO:0060089//molecular transducer activity;GO:0099600//transmembrane receptor activity;GO:0004871//signal transducer activity;GO:0038023//signaling receptor activity;GO:0004872//receptor activity;GO:0004888//transmembrane signaling receptor activity;GO:0004930//G-protein coupled receptor activity	GO:0051247//positive regulation of protein metabolic process;GO:1902106//negative regulation of leukocyte differentiation;GO:2000026//regulation of multicellular organismal development;GO:0023051//regulation of signaling;GO:0045937//positive regulation of phosphate metabolic process;GO:1902105//regulation of leukocyte differentiation;GO:0060191//regulation of lipase activity;GO:0060249//anatomica…
TCONS_00004012	226.077	8.47	2.36333	0.06	-5.29972	3.16371e-05	0.0012495	yes	DOCK10	XP_017914372.1 PREDICTED: dedicator of cytokinesis protein 10 isoform X8 [Capra hircus]	-	-	-	-	GO:0031982//vesicle;GO:0031988//membrane-bounded vesicle;GO:0043226//organelle;GO:0043227//membrane-bounded organelle	GO:0031267//small GTPase binding;GO:0005085//guanyl-nucleotide exchange factor activity;GO:0019899//enzyme binding;GO:0005515//protein binding;GO:0017016//Ras GTPase binding;GO:0098772//molecular function regulator;GO:0051020//GTPase binding;GO:0005488//binding;GO:0005088//Ras guanyl-nucleotide exchange factor activity	GO:0051336//regulation of hydrolase activity;GO:0050790//regulation of catalytic activity;GO:0006928//movement of cell or subcellular component;GO:0016477//cell migration;GO:0043087//regulation of GTPase activity;GO:0044763//single-organism cellular process;GO:0040011//locomotion;GO:0051674//localization of cell;GO:0051179//localization;GO:0048870//cell motility;GO:0065007//biological regulation;…
TCONS_00004025	182.653	0	1.69667	0.001	-10.7285	1.35186e-08	1.3467e-06	yes	DOCK10	XP_014949043.1 PREDICTED: dedicator of cytokinesis protein 10 isoform X7 [Ovis aries]	-	-	-	-	GO:0031988//membrane-bounded vesicle;GO:0031982//vesicle;GO:0043226//organelle;GO:0043227//membrane-bounded organelle	GO:0051020//GTPase binding;GO:0019899//enzyme binding;GO:0005515//protein binding;GO:0098772//molecular function regulator;GO:0005488//binding;GO:0005088//Ras guanyl-nucleotide exchange factor activity;GO:0031267//small GTPase binding;GO:0017016//Ras GTPase binding;GO:0005085//guanyl-nucleotide exchange factor activity	GO:0065009//regulation of molecular function;GO:0006928//movement of cell or subcellular component;GO:0051674//localization of cell;GO:0019222//regulation of metabolic process;GO:0044763//single-organism cellular process;GO:0044699//single-organism process;GO:0009987//cellular process;GO:0050789//regulation of biological process;GO:0065007//biological regulation;GO:0051336//regulation of hydrolas…
TCONS_00004174	203.333	28.5733	2.13333	0.2	-3.41504	0.000302414	0.0081206	yes	BARD1	XP_013828006.2 PREDICTED: BRCA1-associated RING domain protein 1 isoform X1 [Capra hircus]	-	-	-	-	GO:0044464//cell part;GO:0005622//intracellular;GO:0044446//intracellular organelle part;GO:1990234//transferase complex;GO:0044428//nuclear part;GO:0043227//membrane-bounded organelle;GO:1902494//catalytic complex;GO:0032991//macromolecular complex;GO:0043234//protein complex;GO:0043232//intracellular non-membrane-bounded organelle;GO:0043231//intracellular membrane-bounded organelle;GO:0000152/…	GO:0043169//cation binding;GO:0046872//metal ion binding;GO:0005488//binding;GO:0043167//ion binding;GO:0046983//protein dimerization activity;GO:0046914//transition metal ion binding;GO:0005515//protein binding	GO:0008152//metabolic process;GO:0051049//regulation of transport;GO:0065007//biological regulation;GO:0044267//cellular protein metabolic process;GO:0060341//regulation of cellular localization;GO:0010941//regulation of cell death;GO:0016567//protein ubiquitination;GO:0006796//phosphate-containing compound metabolic process;GO:0050789//regulation of biological process;GO:0071704//organic substan…
TCONS_00004401	75.51	0	0.62	0.001	-9.27612	0.00133169	0.0266153	yes	Clasp1	XP_010859123.1 PREDICTED: CLIP-associating protein 1 isoform X3 [Bison bison bison]	-	-	-	-	GO:0005874//microtubule;GO:0043232//intracellular non-membrane-bounded organelle;GO:0044464//cell part;GO:0005938//cell cortex;GO:0044430//cytoskeletal part;GO:0031982//vesicle;GO:0099513//polymeric cytoskeletal fiber;GO:0044424//intracellular part;GO:0005856//cytoskeleton;GO:0005737//cytoplasm;GO:0005876//spindle microtubule;GO:0005622//intracellular;GO:0005819//spindle;GO:0099568//cytoplasmic r…	GO:0008017//microtubule binding;GO:0005488//binding;GO:0005515//protein binding;GO:0008092//cytoskeletal protein binding;GO:0032403//protein complex binding;GO:0044877//macromolecular complex binding;GO:0015631//tubulin binding	GO:0033043//regulation of organelle organization;GO:0051234//establishment of localization;GO:0051641//cellular localization;GO:0032886//regulation of microtubule-based process;GO:0051640//organelle localization;GO:0050789//regulation of biological process;GO:0050794//regulation of cellular process;GO:0007017//microtubule-based process;GO:0065007//biological regulation;GO:0009987//cellular proces…
TCONS_00004472	423.467	0	3.16333	0.001	-11.6272	2.57812e-06	0.000140342	yes	MGAT5	XP_017917563.1 PREDICTED: alpha-1,6-mannosylglycoprotein 6-beta-N-acetylglucosaminyltransferase A [Capra hircus]	Metabolism	Glycan biosynthesis and metabolism;Global and Overview	ko01100//Metabolic pathways;ko00510//N-Glycan biosynthesis	K00744	GO:0031988//membrane-bounded vesicle;GO:0043227//membrane-bounded organelle;GO:0031982//vesicle;GO:0043226//organelle	GO:0008194//UDP-glycosyltransferase activity;GO:0016757//transferase activity, transferring glycosyl groups;GO:0008375//acetylglucosaminyltransferase activity;GO:0003824//catalytic activity;GO:0016758//transferase activity, transferring hexosyl groups;GO:0016740//transferase activity	GO:0044238//primary metabolic process;GO:0044723//single-organism carbohydrate metabolic process;GO:0019538//protein metabolic process;GO:0043170//macromolecule metabolic process;GO:0043412//macromolecule modification;GO:0043413//macromolecule glycosylation;GO:0034645//cellular macromolecule biosynthetic process;GO:0005975//carbohydrate metabolic process;GO:0006464//cellular protein modification …
TCONS_00004473	1869.62	654.257	15.5867	4.13667	-1.91377	0.00262369	0.0448287	yes	MGAT5	XP_017917563.1 PREDICTED: alpha-1,6-mannosylglycoprotein 6-beta-N-acetylglucosaminyltransferase A [Capra hircus]	Metabolism	Glycan biosynthesis and metabolism;Global and Overview	ko01100//Metabolic pathways;ko00510//N-Glycan biosynthesis	K00744	GO:0043227//membrane-bounded organelle;GO:0043226//organelle;GO:0031988//membrane-bounded vesicle;GO:0031982//vesicle	GO:0003824//catalytic activity;GO:0016740//transferase activity;GO:0016758//transferase activity, transferring hexosyl groups;GO:0008194//UDP-glycosyltransferase activity;GO:0016757//transferase activity, transferring glycosyl groups;GO:0008375//acetylglucosaminyltransferase activity	GO:0009059//macromolecule biosynthetic process;GO:0009101//glycoprotein biosynthetic process;GO:0044249//cellular biosynthetic process;GO:0009987//cellular process;GO:0070085//glycosylation;GO:0036211//protein modification process;GO:0043170//macromolecule metabolic process;GO:0043412//macromolecule modification;GO:0034645//cellular macromolecule biosynthetic process;GO:0043413//macromolecule gly…
TCONS_00004617	71.71	0	0.78	0.001	-9.60733	5.28063e-05	0.00192383	yes	GPD2	XP_004004734.1 PREDICTED: glycerol-3-phosphate dehydrogenase, mitochondrial isoform X1 [Ovis aries]	Metabolism	Global and Overview;Lipid metabolism	ko00564//Glycerophospholipid metabolism;ko01110//Biosynthesis of secondary metabolites	K00111	GO:0044446//intracellular organelle part;GO:0005623//cell;GO:0043227//membrane-bounded organelle;GO:0043226//organelle;GO:0031975//envelope;GO:0044422//organelle part;GO:0043231//intracellular membrane-bounded organelle;GO:0005737//cytoplasm;GO:0043229//intracellular organelle;GO:0005622//intracellular;GO:0044464//cell part;GO:0044424//intracellular part;GO:0019866//organelle inner membrane;GO:00…	GO:0046872//metal ion binding;GO:0016901//oxidoreductase activity, acting on the CH-OH group of donors, quinone or similar compound as acceptor;GO:0003824//catalytic activity;GO:0016491//oxidoreductase activity;GO:0043167//ion binding;GO:0043169//cation binding;GO:0052590//sn-glycerol-3-phosphate:ubiquinone oxidoreductase activity;GO:0004368//glycerol-3-phosphate dehydrogenase activity;GO:0005488…	GO:0006071//glycerol metabolic process;GO:0048513//animal organ development;GO:0044763//single-organism cellular process;GO:0006629//lipid metabolic process;GO:0044723//single-organism carbohydrate metabolic process;GO:0019400//alditol metabolic process;GO:0009987//cellular process;GO:0019751//polyol metabolic process;GO:0008152//metabolic process;GO:0044767//single-organism developmental process…
TCONS_00005198	1535.64	395.43	29.2367	6.08	-2.26564	0.00154822	0.0297826	yes	RCC2	XP_006066659.1 PREDICTED: protein RCC2, partial [Bubalus bubalis]	-	-	-	-	GO:0043228//non-membrane-bounded organelle;GO:0000775//chromosome, centromeric region;GO:0051233//spindle midzone;GO:0044424//intracellular part;GO:0005856//cytoskeleton;GO:0044422//organelle part;GO:0005694//chromosome;GO:0044427//chromosomal part;GO:0005819//spindle;GO:0043232//intracellular non-membrane-bounded organelle;GO:0043229//intracellular organelle;GO:0015630//microtubule cytoskeleton;…	GO:0003676//nucleic acid binding;GO:0019899//enzyme binding;GO:0031267//small GTPase binding;GO:0051020//GTPase binding;GO:0005515//protein binding;GO:1901363//heterocyclic compound binding;GO:0097159//organic cyclic compound binding;GO:0017048//Rho GTPase binding;GO:0005488//binding;GO:0008092//cytoskeletal protein binding;GO:0003723//RNA binding;GO:0017016//Ras GTPase binding;GO:0015631//tubuli…	GO:0048519//negative regulation of biological process;GO:0007165//signal transduction;GO:0045216//cell-cell junction organization;GO:0022604//regulation of cell morphogenesis;GO:0051495//positive regulation of cytoskeleton organization;GO:0034330//cell junction organization;GO:0007044//cell-substrate junction assembly;GO:0051336//regulation of hydrolase activity;GO:0070727//cellular macromolecule…
TCONS_00005359	118.71	0.17	1.79	0.00333333	-9.06878	8.0145e-06	0.000382136	yes	E2F2	XP_874289.3 PREDICTED: transcription factor E2F2 [Bos taurus]	Cellular Processes	Cell growth and death	ko04110//Cell cycle	K09389	GO:0070013//intracellular organelle lumen;GO:0005634//nucleus;GO:0043233//organelle lumen;GO:0031974//membrane-enclosed lumen;GO:0043227//membrane-bounded organelle;GO:0044464//cell part;GO:0043234//protein complex;GO:0032991//macromolecular complex;GO:0043229//intracellular organelle;GO:0044424//intracellular part;GO:0005622//intracellular;GO:0044446//intracellular organelle part;GO:0044428//nuc…	GO:0000975//regulatory region DNA binding;GO:1901363//heterocyclic compound binding;GO:0003677//DNA binding;GO:0005515//protein binding;GO:0044212//transcription regulatory region DNA binding;GO:0003676//nucleic acid binding;GO:0097159//organic cyclic compound binding;GO:0005488//binding;GO:0001067//regulatory region nucleic acid binding;GO:0001071//nucleic acid binding transcription factor activ…	GO:0016070//RNA metabolic process;GO:0032774//RNA biosynthetic process;GO:0044260//cellular macromolecule metabolic process;GO:0006807//nitrogen compound metabolic process;GO:0060255//regulation of macromolecule metabolic process;GO:0097659//nucleic acid-templated transcription;GO:0065007//biological regulation;GO:0006725//cellular aromatic compound metabolic process;GO:0044238//primary metabolic…
TCONS_00005370	48.49	0	1.4	0.001	-10.4512	0.000239723	0.00671599	yes	CNR2	XP_011970747.1 PREDICTED: cannabinoid receptor 2 isoform X1 [Ovis aries musimon]	Environmental Information Processing	Signaling molecules and interaction	ko04080//Neuroactive ligand-receptor interaction	K04278	GO:0016020//membrane;GO:0031224//intrinsic component of membrane;GO:0044425//membrane part	GO:0004930//G-protein coupled receptor activity;GO:0038023//signaling receptor activity;GO:0099600//transmembrane receptor activity;GO:0060089//molecular transducer activity;GO:0004888//transmembrane signaling receptor activity;GO:0004871//signal transducer activity;GO:0004872//receptor activity	GO:0050794//regulation of cellular process;GO:0050896//response to stimulus;GO:0050789//regulation of biological process;GO:0023052//signaling;GO:0044700//single organism signaling;GO:0007186//G-protein coupled receptor signaling pathway;GO:0051716//cellular response to stimulus;GO:0007154//cell communication;GO:0044763//single-organism cellular process;GO:0009987//cellular process;GO:0007165//si…
TCONS_00005424	27.5667	0	0.58	0.001	-9.17991	0.00253437	0.0436676	yes	ZNF683	XP_005676873.1 PREDICTED: zinc finger protein 683 [Capra hircus]	-	-	-	-	-	GO:0043167//ion binding;GO:0005488//binding;GO:0097159//organic cyclic compound binding;GO:0043169//cation binding	-
TCONS_00005585	546.24	168.73	3.49	0.696667	-2.32469	0.00132797	0.0265886	yes	Ptp4a2	ELR48726.1 Protein tyrosine phosphatase type IVA 2, partial [Bos mutus]	-	-	-	-	GO:0043227//membrane-bounded organelle;GO:0044464//cell part;GO:0005737//cytoplasm;GO:0044424//intracellular part;GO:0005768//endosome;GO:0043226//organelle;GO:0031988//membrane-bounded vesicle;GO:0043231//intracellular membrane-bounded organelle;GO:0005622//intracellular;GO:0043229//intracellular organelle;GO:0031982//vesicle;GO:0005623//cell;GO:0044444//cytoplasmic part;GO:0016020//membrane;GO:…	GO:0016791//phosphatase activity;GO:0016788//hydrolase activity, acting on ester bonds;GO:0003824//catalytic activity;GO:0042578//phosphoric ester hydrolase activity;GO:0004721//phosphoprotein phosphatase activity;GO:0016787//hydrolase activity	GO:0009987//cellular process;GO:0044237//cellular metabolic process;GO:0043412//macromolecule modification;GO:0044238//primary metabolic process;GO:0006793//phosphorus metabolic process;GO:0044260//cellular macromolecule metabolic process;GO:0071704//organic substance metabolic process;GO:0006464//cellular protein modification process;GO:0044267//cellular protein metabolic process;GO:0008152//met…
TCONS_00005621	80.8033	2.14333	2.15667	0.0366667	-5.87819	0.00205294	0.0373962	yes	RNF19B	XP_017913567.1 PREDICTED: E3 ubiquitin-protein ligase RNF19B isoform X3 [Capra hircus]	-	-	-	-	GO:0005623//cell;GO:0044425//membrane part;GO:0043229//intracellular organelle;GO:0005773//vacuole;GO:0016020//membrane;GO:0044464//cell part;GO:0044444//cytoplasmic part;GO:0000323//lytic vacuole;GO:0043226//organelle;GO:0043231//intracellular membrane-bounded organelle;GO:0031224//intrinsic component of membrane;GO:0044424//intracellular part;GO:0005764//lysosome;GO:0005737//cytoplasm;GO:004322…	GO:0046872//metal ion binding;GO:0043167//ion binding;GO:0043169//cation binding;GO:0003824//catalytic activity;GO:0005488//binding;GO:0046914//transition metal ion binding	GO:0050663//cytokine secretion;GO:0036211//protein modification process;GO:0045184//establishment of protein localization;GO:0002252//immune effector process;GO:0009987//cellular process;GO:0032501//multicellular organismal process;GO:0001906//cell killing;GO:0006464//cellular protein modification process;GO:0051641//cellular localization;GO:0071702//organic substance transport;GO:0051649//establ…
TCONS_00005727	197.92	13.6467	5.00667	0.236667	-4.40292	0.000552106	0.0133045	yes	SP140L	XP_005676721.2 PREDICTED: nuclear autoantigen Sp-100 isoform X1 [Capra hircus]	-	-	-	-	-	-	-
TCONS_00006222	868.117	198.79	6.74333	0.98	-2.78261	0.00016204	0.00484049	yes	Gls	XP_012009677.1 PREDICTED: glutaminase kidney isoform, mitochondrial isoform X5 [Ovis aries musimon]	Metabolism;Organismal Systems	Global and Overview;Nervous system;Excretory system;Amino acid metabolism;Metabolism of other amino acids	ko01100//Metabolic pathways;ko04724//Glutamatergic synapse;ko04727//GABAergic synapse;ko00250//Alanine, aspartate and glutamate metabolism;ko04964//Proximal tubule bicarbonate reclamation;ko00220//Arginine biosynthesis;ko00471//D-Glutamine and D-glutamate metabolism	K01425	-	GO:0016810//hydrolase activity, acting on carbon-nitrogen (but not peptide) bonds;GO:0003824//catalytic activity;GO:0016787//hydrolase activity;GO:0016811//hydrolase activity, acting on carbon-nitrogen (but not peptide) bonds, in linear amides	GO:0022607//cellular component assembly;GO:0019752//carboxylic acid metabolic process;GO:0016043//cellular component organization;GO:0009987//cellular process;GO:0071840//cellular component organization or biogenesis;GO:0043436//oxoacid metabolic process;GO:0009064//glutamine family amino acid metabolic process;GO:0051259//protein oligomerization;GO:0044238//primary metabolic process;GO:0070271//…
TCONS_00006615	154.777	2.29333	3.39	0.03	-6.82018	0.00159225	0.0304328	yes	RBMS1	XP_006073203.1 PREDICTED: RNA-binding motif, single-stranded-interacting protein 1 isoform X6 [Bubalus bubalis]	-	-	-	-	GO:0005623//cell;GO:0043229//intracellular organelle;GO:0044464//cell part;GO:0043226//organelle;GO:0043227//membrane-bounded organelle;GO:0044424//intracellular part;GO:0043231//intracellular membrane-bounded organelle;GO:0005622//intracellular	GO:0003723//RNA binding;GO:1901363//heterocyclic compound binding;GO:0005488//binding;GO:0097159//organic cyclic compound binding;GO:0003676//nucleic acid binding	GO:0006807//nitrogen compound metabolic process;GO:0090304//nucleic acid metabolic process;GO:0034641//cellular nitrogen compound metabolic process;GO:0044237//cellular metabolic process;GO:0044238//primary metabolic process;GO:0046483//heterocycle metabolic process;GO:0006725//cellular aromatic compound metabolic process;GO:0071704//organic substance metabolic process;GO:0044260//cellular macrom…
TCONS_00006658	4.98333	386.727	0.0466667	2.36	5.66025	7.37345e-05	0.0025399	yes	SCN3A	XP_014333834.1 PREDICTED: sodium channel protein type 3 subunit alpha isoform X7 [Bos mutus]	Organismal Systems	Sensory system	ko04742//Taste transduction	K04836	-	-	-
TCONS_00006678	0	75.24	0.001	0.503333	8.97537	0.000189095	0.00550139	yes	SCN7A	XP_013824660.2 PREDICTED: sodium channel protein type 7 subunit alpha [Capra hircus]	Organismal Systems	Circulatory system	ko04261//Adrenergic signaling in cardiomyocytes	K04839	-	-	-
TCONS_00006766	716.77	21.3467	9.93333	0.243333	-5.35127	0.000464247	0.011549	yes	Wipf1	XP_017920376.1 PREDICTED: WAS/WASL-interacting protein family member 1 [Capra hircus]	Cellular Processes	Transport and catabolism	ko04144//Endocytosis	K19475	GO:0005622//intracellular;GO:0043228//non-membrane-bounded organelle;GO:0043229//intracellular organelle;GO:0015629//actin cytoskeleton;GO:0005856//cytoskeleton;GO:0044424//intracellular part;GO:0043232//intracellular non-membrane-bounded organelle;GO:0043226//organelle;GO:0044464//cell part;GO:0005623//cell	-	GO:0006928//movement of cell or subcellular component;GO:0071840//cellular component organization or biogenesis;GO:0050896//response to stimulus;GO:0044763//single-organism cellular process;GO:0007015//actin filament organization;GO:0043933//macromolecular complex subunit organization;GO:1902589//single-organism organelle organization;GO:0071822//protein complex subunit organization;GO:0030029//a…
TCONS_00006850	686.55	45.3433	0.496667	0.0233333	-4.41181	0.000107028	0.00347892	yes	TTN	XP_017920706.1 PREDICTED: titin isoform X1 [Capra hircus]	-	-	-	-	GO:0044444//cytoplasmic part;GO:0031674//I band;GO:0044449//contractile fiber part;GO:0043229//intracellular organelle;GO:0044464//cell part;GO:0043226//organelle;GO:0043292//contractile fiber;GO:0005623//cell;GO:0044424//intracellular part;GO:0005737//cytoplasm;GO:0005622//intracellular;GO:0044422//organelle part;GO:0030016//myofibril;GO:0030017//sarcomere;GO:0043232//intracellular non-membrane-…	GO:0016301//kinase activity;GO:0016772//transferase activity, transferring phosphorus-containing groups;GO:0032549//ribonucleoside binding;GO:0003824//catalytic activity;GO:0005488//binding;GO:0097159//organic cyclic compound binding;GO:0032550//purine ribonucleoside binding;GO:0001883//purine nucleoside binding;GO:1901363//heterocyclic compound binding;GO:0001882//nucleoside binding;GO:0016740//…	GO:0044767//single-organism developmental process;GO:0030154//cell differentiation;GO:0048869//cellular developmental process;GO:0030029//actin filament-based process;GO:0048468//cell development;GO:0048644//muscle organ morphogenesis;GO:0031032//actomyosin structure organization;GO:0036211//protein modification process;GO:0032989//cellular component morphogenesis;GO:0060415//muscle tissue morpho…
TCONS_00007100	901.23	0	17.5033	0.001	-14.0953	4.289e-06	0.000222574	yes	Hdlbp	XP_017895327.1 PREDICTED: vigilin [Capra hircus]	-	-	-	-	-	GO:0097159//organic cyclic compound binding;GO:1901363//heterocyclic compound binding;GO:0005488//binding;GO:0003676//nucleic acid binding	-
TCONS_00007195	1267.76	53.7367	12.45	0.413333	-4.9127	8.46674e-09	8.68649e-07	yes	HJURP	XP_014947131.1 PREDICTED: LOW QUALITY PROTEIN: Holliday junction recognition protein isoform X1 [Ovis aries]	-	-	-	-	GO:0098687//chromosomal region;GO:0043234//protein complex;GO:0032991//macromolecular complex;GO:0043227//membrane-bounded organelle;GO:0005694//chromosome;GO:0044422//organelle part;GO:0044424//intracellular part;GO:0043232//intracellular non-membrane-bounded organelle;GO:0043228//non-membrane-bounded organelle;GO:0000775//chromosome, centromeric region;GO:0005623//cell;GO:0044427//chromosomal p…	GO:0005488//binding;GO:0005515//protein binding	GO:0044087//regulation of cellular component biogenesis;GO:0051276//chromosome organization;GO:0006996//organelle organization;GO:0016043//cellular component organization;GO:0044763//single-organism cellular process;GO:0071822//protein complex subunit organization;GO:0043486//histone exchange;GO:0043044//ATP-dependent chromatin remodeling;GO:0009987//cellular process;GO:0065007//biological regula…
TCONS_00007275	158.293	0	2.19667	0.001	-11.1011	0.000160715	0.00481055	yes	THRAP3	XP_005678755.1 PREDICTED: thyroid hormone receptor-associated protein 3 isoform X2 [Capra hircus]	-	-	-	-	GO:0005623//cell;GO:0043227//membrane-bounded organelle;GO:0044464//cell part;GO:0043229//intracellular organelle;GO:0043234//protein complex;GO:0043231//intracellular membrane-bounded organelle;GO:0005622//intracellular;GO:0032991//macromolecular complex;GO:0044424//intracellular part;GO:0043226//organelle	GO:0060089//molecular transducer activity;GO:0005488//binding;GO:0003712//transcription cofactor activity;GO:0003723//RNA binding;GO:0003676//nucleic acid binding;GO:0005515//protein binding;GO:0000988//transcription factor activity, protein binding;GO:0001076//transcription factor activity, RNA polymerase II transcription factor binding;GO:1901363//heterocyclic compound binding;GO:0097159//organ…	GO:0044763//single-organism cellular process;GO:0009755//hormone-mediated signaling pathway;GO:0050794//regulation of cellular process;GO:0009059//macromolecule biosynthetic process;GO:1901360//organic cyclic compound metabolic process;GO:0043487//regulation of RNA stability;GO:0032774//RNA biosynthetic process;GO:0048545//response to steroid hormone;GO:0034654//nucleobase-containing compound bio…
TCONS_00007309	0	782.423	0.001	2.29333	11.1632	8.8443e-13	2.63833e-10	yes	Macf1	XP_017897615.1 PREDICTED: microtubule-actin cross-linking factor 1 isoform X5 [Capra hircus]	-	-	-	-	GO:0098589//membrane region;GO:0044424//intracellular part;GO:0043231//intracellular membrane-bounded organelle;GO:0042995//cell projection;GO:0044459//plasma membrane part;GO:0043226//organelle;GO:0031253//cell projection membrane;GO:0005856//cytoskeleton;GO:0043229//intracellular organelle;GO:0005622//intracellular;GO:0005623//cell;GO:0043227//membrane-bounded organelle;GO:0015630//microtubule …	GO:0003723//RNA binding;GO:0005488//binding;GO:0005515//protein binding;GO:0016462//pyrophosphatase activity;GO:0016818//hydrolase activity, acting on acid anhydrides, in phosphorus-containing anhydrides;GO:0017111//nucleoside-triphosphatase activity;GO:0016787//hydrolase activity;GO:0003824//catalytic activity;GO:0015631//tubulin binding;GO:1901363//heterocyclic compound binding;GO:0043167//ion …	GO:0051234//establishment of localization;GO:0007017//microtubule-based process;GO:0007166//cell surface receptor signaling pathway;GO:0007165//signal transduction;GO:1902578//single-organism localization;GO:0070727//cellular macromolecule localization;GO:0033036//macromolecule localization;GO:0045184//establishment of protein localization;GO:0051641//cellular localization;GO:0051716//cellular re…
TCONS_00007311	1845.09	434.19	5.58333	0.933333	-2.58066	4.44868e-05	0.0016684	yes	MACF1	XP_017897606.1 PREDICTED: microtubule-actin cross-linking factor 1 isoform X3 [Capra hircus]	-	-	-	-	GO:0043226//organelle;GO:0043227//membrane-bounded organelle;GO:0071944//cell periphery;GO:0005886//plasma membrane;GO:0044425//membrane part;GO:0005623//cell;GO:0043229//intracellular organelle;GO:0098805//whole membrane;GO:0098589//membrane region;GO:0031253//cell projection membrane;GO:0043232//intracellular non-membrane-bounded organelle;GO:0042995//cell projection;GO:0043231//intracellular m…	GO:1901363//heterocyclic compound binding;GO:0016817//hydrolase activity, acting on acid anhydrides;GO:0003723//RNA binding;GO:0097159//organic cyclic compound binding;GO:0003676//nucleic acid binding;GO:0046872//metal ion binding;GO:0008092//cytoskeletal protein binding;GO:0043167//ion binding;GO:0017111//nucleoside-triphosphatase activity;GO:0016462//pyrophosphatase activity;GO:0005488//binding…	GO:0007166//cell surface receptor signaling pathway;GO:0033036//macromolecule localization;GO:0061024//membrane organization;GO:0006810//transport;GO:1902578//single-organism localization;GO:0007017//microtubule-based process;GO:0006612//protein targeting to membrane;GO:0007049//cell cycle;GO:0016043//cellular component organization;GO:0006605//protein targeting;GO:0022402//cell cycle process;GO:…
TCONS_00007780	163.77	0	1.68	0.001	-10.7142	2.70189e-07	1.95434e-05	yes	IL12RB2	XP_017900844.1 PREDICTED: interleukin-12 receptor subunit beta-2 isoform X1 [Capra hircus]	Environmental Information Processing	Signal transduction;Signaling molecules and interaction	ko04060//Cytokine-cytokine receptor interaction;ko04630//Jak-STAT signaling pathway	K05064	GO:0044459//plasma membrane part;GO:0016020//membrane;GO:0043235//receptor complex;GO:0044425//membrane part;GO:0043234//protein complex;GO:0071944//cell periphery;GO:0005623//cell;GO:0044464//cell part;GO:0031224//intrinsic component of membrane;GO:0005886//plasma membrane;GO:0032991//macromolecular complex	GO:0004896//cytokine receptor activity;GO:0004871//signal transducer activity;GO:0019955//cytokine binding;GO:0004872//receptor activity;GO:0019900//kinase binding;GO:0099600//transmembrane receptor activity;GO:0005488//binding;GO:0004888//transmembrane signaling receptor activity;GO:0005515//protein binding;GO:0060089//molecular transducer activity;GO:0038023//signaling receptor activity;GO:0019…	GO:0051239//regulation of multicellular organismal process;GO:0071704//organic substance metabolic process;GO:0051704//multi-organism process;GO:0019538//protein metabolic process;GO:0044700//single organism signaling;GO:0007154//cell communication;GO:0009607//response to biotic stimulus;GO:0044763//single-organism cellular process;GO:0009617//response to bacterium;GO:0009605//response to externa…
TCONS_00007850	594.157	81.0067	12.9167	1.09	-3.56683	4.68884e-05	0.00174819	yes	IFI44L	XP_005678306.3 PREDICTED: interferon-induced protein 44-like [Capra hircus]	-	-	-	-	-	-	-
TCONS_00008067	421.867	50.1633	21.3267	1.79333	-3.57194	4.90332e-06	0.000250665	yes	SNX7	XP_017901295.1 PREDICTED: sorting nexin-7 isoform X1 [Capra hircus]	-	-	-	-	-	-	-
TCONS_00008300	967.51	276.2	4.91	0.923333	-2.4108	0.000682315	0.0156561	yes	SPEN	XP_005891342.1 PREDICTED: putative RNA-binding protein 15 isoform X1 [Bos mutus]	-	-	-	-	GO:0031981//nuclear lumen;GO:0044446//intracellular organelle part;GO:0044428//nuclear part;GO:0043231//intracellular membrane-bounded organelle;GO:0043227//membrane-bounded organelle;GO:0031974//membrane-enclosed lumen;GO:0043226//organelle;GO:0044424//intracellular part;GO:0005634//nucleus;GO:0031090//organelle membrane;GO:0005623//cell;GO:0070013//intracellular organelle lumen;GO:0043233//orga…	GO:0036094//small molecule binding;GO:0003676//nucleic acid binding;GO:0003723//RNA binding;GO:0097159//organic cyclic compound binding;GO:1901363//heterocyclic compound binding;GO:0005488//binding	GO:0051173//positive regulation of nitrogen compound metabolic process;GO:0048519//negative regulation of biological process;GO:0080090//regulation of primary metabolic process;GO:0009893//positive regulation of metabolic process;GO:0006355//regulation of transcription, DNA-templated;GO:0048856//anatomical structure development;GO:0010556//regulation of macromolecule biosynthetic process;GO:00650…
TCONS_00008301	557.147	175.63	3.81667	0.763333	-2.32193	0.00163485	0.0310873	yes	SPEN	XP_005891342.1 PREDICTED: putative RNA-binding protein 15 isoform X1 [Bos mutus]	-	-	-	-	GO:0031981//nuclear lumen;GO:0005634//nucleus;GO:0044424//intracellular part;GO:0016020//membrane;GO:0031090//organelle membrane;GO:0044428//nuclear part;GO:0070013//intracellular organelle lumen;GO:0043229//intracellular organelle;GO:0005622//intracellular;GO:0043226//organelle;GO:0043231//intracellular membrane-bounded organelle;GO:0044422//organelle part;GO:0031974//membrane-enclosed lumen;GO:…	GO:1901363//heterocyclic compound binding;GO:0036094//small molecule binding;GO:0003723//RNA binding;GO:0097159//organic cyclic compound binding;GO:0003676//nucleic acid binding;GO:0005488//binding	GO:0007389//pattern specification process;GO:0032502//developmental process;GO:0050789//regulation of biological process;GO:0044767//single-organism developmental process;GO:0032501//multicellular organismal process;GO:0003279//cardiac septum development;GO:0050794//regulation of cellular process;GO:0019222//regulation of metabolic process;GO:0003205//cardiac chamber development;GO:0048513//anima…
TCONS_00008723	149.557	0	2.19333	0.001	-11.0989	1.66284e-05	0.000717012	yes	UBAP2L	XP_012037757.1 PREDICTED: ubiquitin-associated protein 2-like isoform X9 [Ovis aries]	-	-	-	-	-	GO:0003723//RNA binding;GO:0097159//organic cyclic compound binding;GO:0005488//binding;GO:1901363//heterocyclic compound binding;GO:0003676//nucleic acid binding	GO:0044699//single-organism process;GO:0035036//sperm-egg recognition;GO:0019953//sexual reproduction;GO:0044763//single-organism cellular process;GO:0009988//cell-cell recognition;GO:0051704//multi-organism process;GO:0022414//reproductive process;GO:0009566//fertilization;GO:0007338//single fertilization;GO:0044702//single organism reproductive process;GO:0008037//cell recognition;GO:0009987//c…
TCONS_00008930	598.263	38.4567	23.1267	1.12333	-4.3637	5.42793e-07	3.58348e-05	yes	CD1D	ELR50693.1 Spectrin beta chain, brain 2 [Bos mutus]	-	-	-	-	GO:0031224//intrinsic component of membrane;GO:0044464//cell part;GO:0043227//membrane-bounded organelle;GO:0005774//vacuolar membrane;GO:0000323//lytic vacuole;GO:0044425//membrane part;GO:0005623//cell;GO:0044424//intracellular part;GO:0098805//whole membrane;GO:0031090//organelle membrane;GO:0005622//intracellular;GO:0043231//intracellular membrane-bounded organelle;GO:0005773//vacuole;GO:0044…	GO:0030882//lipid antigen binding;GO:0005488//binding;GO:0005515//protein binding;GO:0008289//lipid binding;GO:0003823//antigen binding	GO:0030155//regulation of cell adhesion;GO:0050863//regulation of T cell activation;GO:0002694//regulation of leukocyte activation;GO:0002376//immune system process;GO:0006952//defense response;GO:0002682//regulation of immune system process;GO:0044237//cellular metabolic process;GO:0022407//regulation of cell-cell adhesion;GO:0019882//antigen processing and presentation;GO:0034110//regulation of…
TCONS_00008949	330.51	0	8.32667	0.001	-13.0235	1.17081e-12	3.34949e-10	yes	-	XP_005677343.1 PREDICTED: T-cell surface glycoprotein CD1b-1 [Capra hircus]	Organismal Systems	Immune system	ko04640//Hematopoietic cell lineage	K06448	-	-	-
TCONS_00008954	651.343	0	4.55	0.001	-12.1517	2.29445e-17	2.32725e-14	yes	-	XP_017902083.1 PREDICTED: T-cell surface glycoprotein CD1b-3 [Capra hircus]	Organismal Systems	Immune system	ko04640//Hematopoietic cell lineage	K06448	-	-	-
TCONS_00008955	462.533	4.60333	3.3	0.02	-7.36632	1.26854e-11	2.77782e-09	yes	-	XP_017902083.1 PREDICTED: T-cell surface glycoprotein CD1b-3 [Capra hircus]	Organismal Systems	Immune system	ko04640//Hematopoietic cell lineage	K06448	-	-	-
TCONS_00009185	464.07	41.9167	7.60333	0.476667	-3.99558	9.39154e-07	5.92836e-05	yes	RCSD1	XP_017901935.1 PREDICTED: capZ-interacting protein isoform X3 [Capra hircus]	-	-	-	-	-	-	GO:0006950//response to stress;GO:0009628//response to abiotic stimulus;GO:0006972//hyperosmotic response;GO:0006970//response to osmotic stress;GO:0050896//response to stimulus
TCONS_00009268	172.47	16.29	3.13	0.233333	-3.7457	0.00100893	0.0214622	yes	CAPN10	XP_017895519.1 PREDICTED: calpain-10 [Capra hircus]	-	-	-	-	-	-	-
TCONS_00009421	0	129.137	0.001	1.28333	10.3257	0.000598585	0.0141645	yes	SH3BP4	XP_017896357.1 PREDICTED: SH3 domain-binding protein 4 isoform X1 [Capra hircus]	-	-	-	-	GO:0043227//membrane-bounded organelle;GO:0005622//intracellular;GO:0044464//cell part;GO:0043226//organelle;GO:0031988//membrane-bounded vesicle;GO:0031982//vesicle;GO:0005623//cell;GO:0044424//intracellular part	GO:0005488//binding;GO:0005515//protein binding;GO:0019899//enzyme binding;GO:0031267//small GTPase binding;GO:0051020//GTPase binding	GO:0065009//regulation of molecular function;GO:0009719//response to endogenous stimulus;GO:0048583//regulation of response to stimulus;GO:0034613//cellular protein localization;GO:0072665//protein localization to vacuole;GO:0033036//macromolecule localization;GO:0019222//regulation of metabolic process;GO:0033365//protein localization to organelle;GO:0043200//response to amino acid;GO:0010646//r…
TCONS_00009573	902.35	291.573	20.6033	5.04667	-2.02948	0.00214664	0.038612	yes	INPP5B	XP_017897412.1 PREDICTED: type II inositol 1,4,5-trisphosphate 5-phosphatase isoform X3 [Capra hircus]	Environmental Information Processing;Metabolism	Signal transduction;Carbohydrate metabolism;Global and Overview	ko01100//Metabolic pathways;ko04070//Phosphatidylinositol signaling system;ko00562//Inositol phosphate metabolism	K01099	GO:0044425//membrane part;GO:0005737//cytoplasm;GO:0005622//intracellular;GO:0005623//cell;GO:0016020//membrane;GO:0044424//intracellular part;GO:0043232//intracellular non-membrane-bounded organelle;GO:0043226//organelle;GO:0043229//intracellular organelle;GO:0005856//cytoskeleton;GO:0043228//non-membrane-bounded organelle;GO:0031224//intrinsic component of membrane;GO:0044444//cytoplasmic part;…	GO:0016787//hydrolase activity;GO:0046030//inositol trisphosphate phosphatase activity;GO:0042578//phosphoric ester hydrolase activity;GO:0016791//phosphatase activity;GO:0052745//inositol phosphate phosphatase activity;GO:0003824//catalytic activity;GO:0016788//hydrolase activity, acting on ester bonds;GO:0052866//phosphatidylinositol phosphate phosphatase activity;GO:0034593//phosphatidylinosit…	GO:0006629//lipid metabolic process;GO:0050789//regulation of biological process;GO:0019538//protein metabolic process;GO:0046486//glycerolipid metabolic process;GO:0006650//glycerophospholipid metabolic process;GO:0051674//localization of cell;GO:0008152//metabolic process;GO:0044763//single-organism cellular process;GO:0007276//gamete generation;GO:0044237//cellular metabolic process;GO:0048232…
TCONS_00010052	4256.15	1716.6	61.45	17.6533	-1.79947	0.00273889	0.046371	yes	JAK1	XP_017900620.1 PREDICTED: tyrosine-protein kinase JAK1 [Capra hircus]	Organismal Systems;Environmental Information Processing;Cellular Processes	Cellular commiunity;Development;Signal transduction	ko04151//PI3K-Akt signaling pathway;ko04630//Jak-STAT signaling pathway;ko04550//Signaling pathways regulating pluripotency of stem cells;ko04380//Osteoclast differentiation	K11217	-	-	-
TCONS_00010104	137.47	7.80333	5.09333	0.186667	-4.77007	9.86426e-05	0.00324416	yes	DEPDC1	XP_017900897.1 PREDICTED: DEP domain-containing protein 1A isoform X1 [Capra hircus]	-	-	-	-	GO:0043226//organelle;GO:0043227//membrane-bounded organelle;GO:0043234//protein complex;GO:0044464//cell part;GO:0044424//intracellular part;GO:0043231//intracellular membrane-bounded organelle;GO:0005623//cell;GO:0043229//intracellular organelle;GO:0005622//intracellular;GO:0032991//macromolecular complex	-	GO:0007154//cell communication;GO:0050794//regulation of cellular process;GO:0031323//regulation of cellular metabolic process;GO:0044700//single organism signaling;GO:0050789//regulation of biological process;GO:2001141//regulation of RNA biosynthetic process;GO:0051171//regulation of nitrogen compound metabolic process;GO:0006355//regulation of transcription, DNA-templated;GO:0009987//cellular …
TCONS_00010808	296.233	8.07	3.18	0.0633333	-5.64992	5.5017e-08	4.66797e-06	yes	SV2A	XP_019288503.1 PREDICTED: synaptic vesicle glycoprotein 2A isoform X3 [Panthera pardus]	Environmental Information Processing	Signaling molecules and interaction	ko04512//ECM-receptor interaction	K06258	GO:0043229//intracellular organelle;GO:0044444//cytoplasmic part;GO:0031410//cytoplasmic vesicle;GO:0030054//cell junction;GO:0043231//intracellular membrane-bounded organelle;GO:0005622//intracellular;GO:0031988//membrane-bounded vesicle;GO:0044422//organelle part;GO:0042995//cell projection;GO:0005623//cell;GO:0045202//synapse;GO:0043227//membrane-bounded organelle;GO:0016023//cytoplasmic, memb…	GO:0019900//kinase binding;GO:0005488//binding;GO:0005515//protein binding;GO:0019899//enzyme binding;GO:0005215//transporter activity	GO:1902578//single-organism localization;GO:0051234//establishment of localization;GO:0006810//transport;GO:0055082//cellular chemical homeostasis;GO:0098771//inorganic ion homeostasis;GO:0055065//metal ion homeostasis;GO:0065008//regulation of biological quality;GO:0009987//cellular process;GO:0019725//cellular homeostasis;GO:0044699//single-organism process;GO:0030003//cellular cation homeostas…
TCONS_00010908	181.193	0	3.62667	0.001	-11.8244	1.63808e-06	9.58138e-05	yes	RORC	XP_017901584.1 PREDICTED: nuclear receptor ROR-gamma isoform X4 [Capra hircus]	Organismal Systems	Environmental adaptation	ko04710//Circadian rhythm	K08534	-	-	-
TCONS_00011210	64.9867	1.36333	1.02	0.0133333	-6.25739	0.00256266	0.0440219	yes	FCRL5	XP_017902016.1 PREDICTED: LOW QUALITY PROTEIN: Fc receptor-like protein 5 [Capra hircus]	-	-	-	-	GO:0043234//protein complex;GO:0032991//macromolecular complex	-	GO:1903650//negative regulation of cytoplasmic transport;GO:0048519//negative regulation of biological process;GO:0048523//negative regulation of cellular process;GO:0010646//regulation of cell communication;GO:0032387//negative regulation of intracellular transport;GO:0065007//biological regulation;GO:0010523//negative regulation of calcium ion transport into cytosol;GO:0032879//regulation of lo…
TCONS_00011219	2315.07	0.77	9.61667	0.001	-13.2313	1.54285e-25	9.83654e-22	yes	gag-pro-pol	XP_014963784.1 PREDICTED: LOW QUALITY PROTEIN: endogenous retrovirus group K member 9 Pol protein-like [Ovis aries musimon]	-	-	-	-	-	GO:0003824//catalytic activity	-
TCONS_00011250	852.05	77.05	62.5467	3.56667	-4.13228	1.28605e-06	7.83014e-05	yes	MNDA	ALC80151.1 putative interferon-activable protein 203 [Capra hircus]	-	-	-	-	-	-	-
TCONS_00011320	1213.13	157.39	16.8633	1.48333	-3.50697	4.78237e-07	3.21919e-05	yes	CD84	XP_017901869.1 PREDICTED: SLAM family member 5 isoform X2 [Capra hircus]	-	-	-	-	GO:0016020//membrane;GO:0043227//membrane-bounded organelle;GO:0031982//vesicle;GO:0031988//membrane-bounded vesicle;GO:0043226//organelle;GO:0044425//membrane part;GO:0031224//intrinsic component of membrane	-	-
TCONS_00011321	264.927	22.2133	4.06	0.213333	-4.2503	0.00135802	0.0270205	yes	CD84	XP_017901870.1 PREDICTED: SLAM family member 5 isoform X3 [Capra hircus]	-	-	-	-	-	-	-
TCONS_00011328	1504.99	131.373	91.9933	5.54333	-4.0527	3.57558e-09	4.02966e-07	yes	CD48	XP_017901873.1 PREDICTED: CD48 antigen [Capra hircus]	Organismal Systems	Immune system	ko04650//Natural killer cell mediated cytotoxicity	K06479	GO:0031224//intrinsic component of membrane;GO:0005623//cell;GO:0044425//membrane part;GO:0005886//plasma membrane;GO:0044464//cell part;GO:0044459//plasma membrane part;GO:0016020//membrane;GO:0071944//cell periphery	-	GO:0050789//regulation of biological process;GO:0050794//regulation of cellular process;GO:0044699//single-organism process;GO:0001775//cell activation;GO:0002376//immune system process;GO:0045321//leukocyte activation;GO:0046649//lymphocyte activation;GO:0065007//biological regulation;GO:0044763//single-organism cellular process;GO:0009987//cellular process
TCONS_00011330	344.543	36.03	20.6267	1.45667	-3.82377	1.90057e-05	0.000800948	yes	CD48	XP_017901873.1 PREDICTED: CD48 antigen [Capra hircus]	Organismal Systems	Immune system	ko04650//Natural killer cell mediated cytotoxicity	K06479	GO:0044425//membrane part;GO:0016020//membrane	-	GO:0009987//cellular process;GO:0044699//single-organism process;GO:0044763//single-organism cellular process
TCONS_00011342	249.173	22.8933	20.9333	1.34667	-3.95834	6.92481e-05	0.00241632	yes	CD48	XP_017902031.1 PREDICTED: CD48 antigen-like [Capra hircus]	Organismal Systems	Immune system	ko04650//Natural killer cell mediated cytotoxicity	K06479	GO:0016020//membrane;GO:0044425//membrane part	-	GO:0044763//single-organism cellular process;GO:0044699//single-organism process;GO:0009987//cellular process
TCONS_00011912	923.877	37.96	50.8	1.60667	-4.98269	3.23764e-10	4.79904e-08	yes	AKR1B1	ELR51182.1 Aldose reductase, partial [Bos mutus]	Metabolism	Carbohydrate metabolism;Global and Overview;Lipid metabolism	ko01100//Metabolic pathways;ko00561//Glycerolipid metabolism;ko00051//Fructose and mannose metabolism;ko00040//Pentose and glucuronate interconversions;ko00052//Galactose metabolism	K00011	GO:0044464//cell part;GO:0044424//intracellular part;GO:0005623//cell;GO:0005622//intracellular	GO:0016229//steroid dehydrogenase activity;GO:0008106//alcohol dehydrogenase (NADP+) activity;GO:0016491//oxidoreductase activity;GO:0033764//steroid dehydrogenase activity, acting on the CH-OH group of donors, NAD or NADP as acceptor;GO:0003824//catalytic activity;GO:0016616//oxidoreductase activity, acting on the CH-OH group of donors, NAD or NADP as acceptor;GO:0016614//oxidoreductase activity…	GO:0044699//single-organism process;GO:0008152//metabolic process;GO:0044710//single-organism metabolic process
TCONS_00012155	580.35	199.597	54.61	13.08	-2.0618	0.00136439	0.0271111	yes	SRI	XP_005628534.1 PREDICTED: sorcin isoform X1 [Canis lupus familiaris]	-	-	-	-	-	-	-
TCONS_00012362	67.5867	0	8.33333	0.001	-13.0247	6.16342e-05	0.00219878	yes	TRGV3	XP_017902686.1 PREDICTED: T-cell receptor gamma-2 chain C region [Capra hircus]	-	-	-	-	-	-	-
TCONS_00012367	166.693	0	5.91667	0.001	-12.5306	7.85383e-09	8.20863e-07	yes	-	CAA78351.1 TCR gamma, partial [Ovis aries]	-	-	-	-	-	-	-
TCONS_00012370	333.717	0.246667	15.9633	0.01	-10.6405	1.17052e-12	3.34949e-10	yes	-	CAA78311.1 TCR gamma, partial [Ovis aries]	-	-	-	-	-	-	-
TCONS_00012501	203.563	4.51	5.55	0.07	-6.30899	0.0020611	0.0374531	yes	PTPN12	XP_017902757.1 PREDICTED: tyrosine-protein phosphatase non-receptor type 12 isoform X1 [Capra hircus]	-	-	-	-	GO:0005622//intracellular;GO:0016020//membrane;GO:0044444//cytoplasmic part;GO:0044424//intracellular part;GO:0005623//cell;GO:0005737//cytoplasm;GO:0044464//cell part	GO:0019904//protein domain specific binding;GO:0016787//hydrolase activity;GO:0003824//catalytic activity;GO:0016791//phosphatase activity;GO:0004721//phosphoprotein phosphatase activity;GO:0005515//protein binding;GO:0016788//hydrolase activity, acting on ester bonds;GO:0042578//phosphoric ester hydrolase activity;GO:0005488//binding	GO:0016311//dephosphorylation;GO:0006796//phosphate-containing compound metabolic process;GO:0044237//cellular metabolic process;GO:0043412//macromolecule modification;GO:0006470//protein dephosphorylation;GO:0008152//metabolic process;GO:0044260//cellular macromolecule metabolic process;GO:0019538//protein metabolic process;GO:0036211//protein modification process;GO:0009987//cellular process;GO…
TCONS_00012844	95.5233	0.0333333	1.59	0.001	-10.6348	0.00219278	0.0391447	yes	IKZF1	XP_005678944.1 PREDICTED: DNA-binding protein Ikaros isoform X4 [Capra hircus]	-	-	-	-	GO:0044427//chromosomal part;GO:0044464//cell part;GO:0005623//cell;GO:0000775//chromosome, centromeric region;GO:0043229//intracellular organelle;GO:0005622//intracellular;GO:0098687//chromosomal region;GO:0044422//organelle part;GO:0043232//intracellular non-membrane-bounded organelle;GO:0043226//organelle;GO:0044424//intracellular part;GO:0043231//intracellular membrane-bounded organelle;GO:00…	GO:0097159//organic cyclic compound binding;GO:0043167//ion binding;GO:1901363//heterocyclic compound binding;GO:0005515//protein binding;GO:0043169//cation binding;GO:0003676//nucleic acid binding;GO:0001071//nucleic acid binding transcription factor activity;GO:0046983//protein dimerization activity;GO:0003677//DNA binding;GO:0005488//binding	GO:0050793//regulation of developmental process;GO:0045580//regulation of T cell differentiation;GO:0046638//positive regulation of alpha-beta T cell differentiation;GO:0048534//hematopoietic or lymphoid organ development;GO:0050794//regulation of cellular process;GO:0010468//regulation of gene expression;GO:0051239//regulation of multicellular organismal process;GO:0009888//tissue development;GO…
TCONS_00012974	273.593	24.7667	10.1033	0.563333	-4.1647	0.000185817	0.00543437	yes	GIMAP4	XP_017902230.1 PREDICTED: GTPase IMAP family member 4-like isoform X1 [Capra hircus]	-	-	-	-	GO:0044444//cytoplasmic part;GO:0005623//cell;GO:0005737//cytoplasm;GO:0044464//cell part;GO:0044424//intracellular part;GO:0005622//intracellular	-	-
TCONS_00012975	82.12	1.73	2.45667	0.0366667	-6.06609	0.000927401	0.0200625	yes	GIMAP4	XP_017902235.1 PREDICTED: GTPase IMAP family member 4-like isoform X2 [Capra hircus]	-	-	-	-	GO:0044424//intracellular part;GO:0044464//cell part;GO:0005737//cytoplasm;GO:0005623//cell;GO:0005622//intracellular;GO:0044444//cytoplasmic part	-	-
TCONS_00013112	2840.72	491.413	81.7967	11.0867	-2.88322	3.19294e-05	0.0012577	yes	Zyx	XP_012016989.1 PREDICTED: zyxin isoform X2 [Ovis aries musimon]	Cellular Processes	Cellular commiunity	ko04510//Focal adhesion	K06273	GO:0043226//organelle;GO:0030055//cell-substrate junction;GO:0005622//intracellular;GO:0070161//anchoring junction;GO:0030054//cell junction;GO:0005623//cell;GO:0044464//cell part;GO:0043228//non-membrane-bounded organelle;GO:0005911//cell-cell junction;GO:0043231//intracellular membrane-bounded organelle;GO:0005924//cell-substrate adherens junction;GO:0043227//membrane-bounded organelle;GO:00059…	GO:1901363//heterocyclic compound binding;GO:0003723//RNA binding;GO:0046914//transition metal ion binding;GO:0097159//organic cyclic compound binding;GO:0043169//cation binding;GO:0046872//metal ion binding;GO:0005488//binding;GO:0043167//ion binding;GO:0003676//nucleic acid binding	GO:0022607//cellular component assembly;GO:0016043//cellular component organization;GO:0007178//transmembrane receptor protein serine/threonine kinase signaling pathway;GO:0007166//cell surface receptor signaling pathway;GO:0044700//single organism signaling;GO:0051716//cellular response to stimulus;GO:0065007//biological regulation;GO:0007010//cytoskeleton organization;GO:0050789//regulation of …
TCONS_00013124	23.76	752.933	3.25667	61.6133	4.24177	0.000290926	0.0078737	yes	PIP	XP_004008180.1 PREDICTED: prolactin-inducible protein homolog [Ovis aries]	-	-	-	-	-	-	-
TCONS_00013136	356.68	12.74	4.98333	0.133333	-5.224	4.64089e-08	4.04528e-06	yes	Ephb6	XP_017902335.1 PREDICTED: ephrin type-B receptor 6 [Capra hircus]	Organismal Systems	Development	ko04360//Axon guidance	K05114	GO:0031224//intrinsic component of membrane;GO:0016021//integral component of membrane;GO:0044425//membrane part;GO:0016020//membrane	GO:0060089//molecular transducer activity;GO:0004872//receptor activity;GO:0005488//binding;GO:0001883//purine nucleoside binding;GO:0032549//ribonucleoside binding;GO:0004713//protein tyrosine kinase activity;GO:1901363//heterocyclic compound binding;GO:0016301//kinase activity;GO:0001882//nucleoside binding;GO:0099600//transmembrane receptor activity;GO:0097159//organic cyclic compound binding;…	GO:0006796//phosphate-containing compound metabolic process;GO:0044765//single-organism transport;GO:0044237//cellular metabolic process;GO:0007267//cell-cell signaling;GO:0050789//regulation of biological process;GO:0065007//biological regulation;GO:0007154//cell communication;GO:0044699//single-organism process;GO:0046903//secretion;GO:0098771//inorganic ion homeostasis;GO:0006464//cellular pro…
TCONS_00013142	2348.79	4.09	250.937	0.37	-9.40558	1.52235e-16	1.23529e-13	yes	TRBC2	AAI22730.1 T cell receptor, beta cluster [Bos taurus]	Environmental Information Processing;Organismal Systems	Signal transduction;Signaling molecules and interaction;Immune system	ko04014//Ras signaling pathway;ko04015//Rap1 signaling pathway;ko04020//Calcium signaling pathway;ko04514//Cell adhesion molecules (CAMs);ko04660//T cell receptor signaling pathway;ko04064//NF-kappa B signaling pathway;ko04612//Antigen processing and presentation;ko04672//Intestinal immune network for IgA production	K10785	-	-	-
TCONS_00013144	576.68	5.01	83.8267	0.64	-7.03319	9.32663e-08	7.46623e-06	yes	V-TCR	CAX32881.1 T-cell receptor beta chain, partial [Ovis aries]	Organismal Systems;Environmental Information Processing	Signaling molecules and interaction;Signal transduction;Immune system	ko04014//Ras signaling pathway;ko04015//Rap1 signaling pathway;ko04020//Calcium signaling pathway;ko04514//Cell adhesion molecules (CAMs);ko04660//T cell receptor signaling pathway;ko04064//NF-kappa B signaling pathway;ko04612//Antigen processing and presentation;ko04672//Intestinal immune network for IgA production	K10785	-	-	-
TCONS_00013145	1650.4	1.68667	222.33	0.196667	-10.1427	2.44903e-12	6.42928e-10	yes	V-TCR	CAX32936.1 T-cell receptor beta chain, partial [Ovis aries]	Environmental Information Processing;Organismal Systems	Signaling molecules and interaction;Signal transduction;Immune system	ko04014//Ras signaling pathway;ko04015//Rap1 signaling pathway;ko04020//Calcium signaling pathway;ko04514//Cell adhesion molecules (CAMs);ko04660//T cell receptor signaling pathway;ko04064//NF-kappa B signaling pathway;ko04612//Antigen processing and presentation;ko04672//Intestinal immune network for IgA production	K10785	-	-	-
TCONS_00013146	5066.97	3.56667	576.747	0.35	-10.6864	4.49744e-18	5.90342e-15	yes	V-TCR	CAX32934.1 T-cell receptor beta chain, partial [Ovis aries]	Environmental Information Processing;Organismal Systems	Signal transduction;Signaling molecules and interaction;Immune system	ko04014//Ras signaling pathway;ko04015//Rap1 signaling pathway;ko04020//Calcium signaling pathway;ko04514//Cell adhesion molecules (CAMs);ko04660//T cell receptor signaling pathway;ko04064//NF-kappa B signaling pathway;ko04612//Antigen processing and presentation;ko04672//Intestinal immune network for IgA production	K10785	-	-	-
TCONS_00013149	2808.96	7.25333	422.107	0.933333	-8.821	6.07238e-12	1.41887e-09	yes	V-TCR	CAX32903.1 T-cell receptor beta chain, partial [Ovis aries]	Environmental Information Processing;Organismal Systems	Signaling molecules and interaction;Signal transduction;Immune system	ko04014//Ras signaling pathway;ko04015//Rap1 signaling pathway;ko04020//Calcium signaling pathway;ko04514//Cell adhesion molecules (CAMs);ko04660//T cell receptor signaling pathway;ko04064//NF-kappa B signaling pathway;ko04612//Antigen processing and presentation;ko04672//Intestinal immune network for IgA production	K10785	-	-	-
TCONS_00013150	2729.79	6.26667	394.69	0.77	-9.00165	1.58869e-13	6.00863e-11	yes	V-TCR	CAX32951.1 T-cell receptor beta chain, partial [Ovis aries]	Environmental Information Processing;Organismal Systems	Signaling molecules and interaction;Signal transduction;Immune system	ko04014//Ras signaling pathway;ko04015//Rap1 signaling pathway;ko04020//Calcium signaling pathway;ko04514//Cell adhesion molecules (CAMs);ko04660//T cell receptor signaling pathway;ko04064//NF-kappa B signaling pathway;ko04612//Antigen processing and presentation;ko04672//Intestinal immune network for IgA production	K10785	-	-	-
TCONS_00013151	883.117	5.06333	122.35	0.633333	-7.59383	9.15788e-08	7.35084e-06	yes	V-TCR	CAX32914.1 T-cell receptor beta chain, partial [Ovis aries]	Environmental Information Processing;Organismal Systems	Immune system;Signaling molecules and interaction;Signal transduction	ko04014//Ras signaling pathway;ko04015//Rap1 signaling pathway;ko04020//Calcium signaling pathway;ko04514//Cell adhesion molecules (CAMs);ko04660//T cell receptor signaling pathway;ko04064//NF-kappa B signaling pathway;ko04612//Antigen processing and presentation;ko04672//Intestinal immune network for IgA production	K10785	-	-	-
TCONS_00013152	1046.25	1.78333	151.53	0.206667	-9.51808	9.19362e-11	1.61536e-08	yes	V-TCR	CAX32952.1 T-cell receptor beta chain, partial [Ovis aries]	Environmental Information Processing;Organismal Systems	Signaling molecules and interaction;Signal transduction;Immune system	ko04014//Ras signaling pathway;ko04015//Rap1 signaling pathway;ko04020//Calcium signaling pathway;ko04514//Cell adhesion molecules (CAMs);ko04660//T cell receptor signaling pathway;ko04064//NF-kappa B signaling pathway;ko04612//Antigen processing and presentation;ko04672//Intestinal immune network for IgA production	K10785	-	-	-
TCONS_00013156	46.7633	0	7.49	0.001	-12.8708	0.00101705	0.0215834	yes	-	AAB84319.1 T-cell receptor beta chain, partial [Capra hircus]	-	-	-	-	GO:0044421//extracellular region part;GO:0031988//membrane-bounded vesicle;GO:0031982//vesicle;GO:0005576//extracellular region;GO:0043226//organelle;GO:0043227//membrane-bounded organelle	GO:0016787//hydrolase activity;GO:0004175//endopeptidase activity;GO:0008233//peptidase activity;GO:0070011//peptidase activity, acting on L-amino acid peptides;GO:0003824//catalytic activity	GO:0022411//cellular component disassembly;GO:0044281//small molecule metabolic process;GO:0071840//cellular component organization or biogenesis;GO:0044763//single-organism cellular process;GO:0006767//water-soluble vitamin metabolic process;GO:0044710//single-organism metabolic process;GO:0044699//single-organism process;GO:0009987//cellular process;GO:0071704//organic substance metabolic proce…
TCONS_00013157	177.213	0.273333	16.4833	0.0233333	-9.4644	2.27189e-06	0.000125797	yes	-	AAB84318.1 T-cell receptor beta chain, partial [Capra hircus]	Environmental Information Processing;Organismal Systems	Signal transduction;Signaling molecules and interaction;Immune system	ko04014//Ras signaling pathway;ko04015//Rap1 signaling pathway;ko04020//Calcium signaling pathway;ko04514//Cell adhesion molecules (CAMs);ko04660//T cell receptor signaling pathway;ko04064//NF-kappa B signaling pathway;ko04612//Antigen processing and presentation;ko04672//Intestinal immune network for IgA production	K10785	-	-	-
TCONS_00013159	300.543	1.73667	29.49	0.14	-7.71866	3.45938e-07	2.44286e-05	yes	-	AAB84330.1 T-cell receptor beta chain, partial [Capra hircus]	Environmental Information Processing;Organismal Systems	Immune system;Signaling molecules and interaction;Signal transduction	ko04014//Ras signaling pathway;ko04015//Rap1 signaling pathway;ko04020//Calcium signaling pathway;ko04514//Cell adhesion molecules (CAMs);ko04660//T cell receptor signaling pathway;ko04064//NF-kappa B signaling pathway;ko04612//Antigen processing and presentation;ko04672//Intestinal immune network for IgA production	K10785	-	-	-
TCONS_00013160	83.63	0	15.5233	0.001	-13.9222	5.9924e-05	0.00214463	yes	-	AAD33800.1 T-cell receptor beta chain TCRVB12, partial [Capra hircus]	Environmental Information Processing;Organismal Systems	Signaling molecules and interaction;Signal transduction;Immune system	ko04014//Ras signaling pathway;ko04015//Rap1 signaling pathway;ko04020//Calcium signaling pathway;ko04514//Cell adhesion molecules (CAMs);ko04660//T cell receptor signaling pathway;ko04064//NF-kappa B signaling pathway;ko04612//Antigen processing and presentation;ko04672//Intestinal immune network for IgA production	K10785	-	-	-
TCONS_00013162	68.28	0	11.5467	0.001	-13.4952	0.000225927	0.00637753	yes	-	AAB84324.1 T-cell receptor beta chain, partial [Capra hircus]	Environmental Information Processing;Organismal Systems	Signal transduction;Signaling molecules and interaction;Immune system	ko04014//Ras signaling pathway;ko04015//Rap1 signaling pathway;ko04020//Calcium signaling pathway;ko04514//Cell adhesion molecules (CAMs);ko04660//T cell receptor signaling pathway;ko04064//NF-kappa B signaling pathway;ko04612//Antigen processing and presentation;ko04672//Intestinal immune network for IgA production	K10785	-	-	-
TCONS_00013165	41.3767	0	5.01333	0.001	-12.2916	0.00233721	0.0410498	yes	-	ELR52672.1 hypothetical protein M91_00608, partial [Bos mutus]	Environmental Information Processing;Organismal Systems	Signaling molecules and interaction;Signal transduction;Immune system	ko04014//Ras signaling pathway;ko04015//Rap1 signaling pathway;ko04020//Calcium signaling pathway;ko04514//Cell adhesion molecules (CAMs);ko04660//T cell receptor signaling pathway;ko04064//NF-kappa B signaling pathway;ko04612//Antigen processing and presentation;ko04672//Intestinal immune network for IgA production	K10785	-	-	-
TCONS_00013166	118.857	1.24	13.7567	0.12	-6.84095	0.000352243	0.00925576	yes	-	ELR46142.1 hypothetical protein M91_17488, partial [Bos mutus]	Environmental Information Processing;Organismal Systems	Immune system;Signaling molecules and interaction;Signal transduction	ko04014//Ras signaling pathway;ko04015//Rap1 signaling pathway;ko04020//Calcium signaling pathway;ko04514//Cell adhesion molecules (CAMs);ko04660//T cell receptor signaling pathway;ko04064//NF-kappa B signaling pathway;ko04612//Antigen processing and presentation;ko04672//Intestinal immune network for IgA production	K10785	-	-	-
TCONS_00013167	102.04	0	9.83	0.001	-13.263	1.12993e-05	0.000514043	yes	-	XP_005981939.1 PREDICTED: uncharacterized protein LOC102332468 [Pantholops hodgsonii]	Environmental Information Processing;Organismal Systems	Signaling molecules and interaction;Signal transduction;Immune system	ko04014//Ras signaling pathway;ko04015//Rap1 signaling pathway;ko04020//Calcium signaling pathway;ko04514//Cell adhesion molecules (CAMs);ko04660//T cell receptor signaling pathway;ko04064//NF-kappa B signaling pathway;ko04612//Antigen processing and presentation;ko04672//Intestinal immune network for IgA production	K10785	-	-	-
TCONS_00013169	274.17	1.36333	4.05333	0.0166667	-7.926	1.14142e-07	8.97169e-06	yes	TCRB	ELR45624.1 hypothetical protein M91_02090, partial [Bos mutus]	Environmental Information Processing;Organismal Systems	Immune system;Signaling molecules and interaction;Signal transduction	ko04014//Ras signaling pathway;ko04015//Rap1 signaling pathway;ko04020//Calcium signaling pathway;ko04514//Cell adhesion molecules (CAMs);ko04660//T cell receptor signaling pathway;ko04064//NF-kappa B signaling pathway;ko04612//Antigen processing and presentation;ko04672//Intestinal immune network for IgA production	K10785	-	-	-
TCONS_00013170	158.94	0	2.38667	0.001	-11.2208	1.11047e-07	8.75602e-06	yes	-	ELR45624.1 hypothetical protein M91_02090, partial [Bos mutus]	-	-	-	-	-	-	-
TCONS_00013172	286.697	0.543333	49.43	0.0833333	-9.21228	1.75364e-08	1.69768e-06	yes	TRBV12-3	AAB84322.1 T-cell receptor beta chain, partial [Capra hircus]	-	-	-	-	-	-	-
TCONS_00013176	178.957	0.543333	7.58667	0.02	-8.56732	6.08855e-07	3.98425e-05	yes	TCRB	AAB88431.1 T-cell receptor beta chain, partial [Ovis aries]	-	-	-	-	-	-	-
TCONS_00013181	594.237	3.02667	10.8167	0.0433333	-7.96356	3.27711e-14	1.43386e-11	yes	TCRB	EPY80719.1 hypothetical protein CB1_000804044 [Camelus ferus]	-	-	-	-	-	-	-
TCONS_00013187	47.4733	0.246667	2.46667	0.01	-7.94642	0.00106792	0.0223862	yes	V-TCR	XP_010853335.1 PREDICTED: uncharacterized protein LOC104999477 [Bison bison bison]	-	-	-	-	-	-	-
TCONS_00013189	154.86	0	1.71333	0.001	-10.7426	1.82453e-08	1.75489e-06	yes	-	XP_015326296.1 PREDICTED: T-cell receptor beta chain V region CTL-F3 [Bos taurus]	-	-	-	-	-	-	-
TCONS_00013213	135.71	0.333333	4.37667	0.00666667	-9.35865	7.35564e-06	0.000352984	yes	V-TCR	DAA30221.1 TPA: hypothetical protein BOS_4668 [Bos taurus]	-	-	-	-	-	-	-
TCONS_00013228	197.647	0	12.4867	0.001	-13.6081	2.85075e-08	2.62995e-06	yes	-	XP_014950608.1 PREDICTED: uncharacterized protein LOC101114438 isoform X1 [Ovis aries]	-	-	-	-	-	-	-
TCONS_00013229	102.827	0	9.61333	0.001	-13.2308	5.849e-05	0.00209835	yes	-	AAB84323.1 T-cell receptor beta chain, partial [Capra hircus]	-	-	-	-	-	-	-
TCONS_00013230	43.1933	0.273333	5.53	0.03	-7.52617	0.00249051	0.0431479	yes	-	CCF72409.1 T cell receptor beta chain, partial [Canis lupus familiaris]	Organismal Systems;Metabolism	Digestive system;Global and Overview;Carbohydrate metabolism	ko01100//Metabolic pathways;ko00500//Starch and sucrose metabolism;ko04973//Carbohydrate digestion and absorption;ko00052//Galactose metabolism	K12047	-	-	-
TCONS_00013478	767.71	3.63	59.09	0.216667	-8.09129	1.61389e-15	1.05095e-12	yes	-	AAT65837.4 T cell receptor gamma C4, partial [Bos taurus]	-	-	-	-	-	-	-
TCONS_00013487	1170.7	7.54667	59.6933	0.29	-7.68537	5.04539e-16	3.75284e-13	yes	TRGC1	CAA78310.1 TCR gamma, partial [Ovis aries]	-	-	-	-	-	-	-
TCONS_00013495	65.22	0.52	6.66667	0.04	-7.38082	0.000128916	0.00404995	yes	TRGV3	XP_002704170.1 PREDICTED: T-cell receptor gamma chain V region PT-gamma-1/2 [Bos taurus]	-	-	-	-	-	-	-
TCONS_00013497	210.21	0.246667	3.1	0.00333333	-9.86109	3.24746e-10	4.79904e-08	yes	TRGV3	ELR45386.1 hypothetical protein M91_10029, partial [Bos mutus]	-	-	-	-	-	-	-
TCONS_00013503	469.17	5.56	21.5133	0.203333	-6.72524	1.07725e-09	1.37755e-07	yes	-	XP_017902987.1 PREDICTED: uncharacterized protein LOC102191204 [Capra hircus]	-	-	-	-	-	-	-
TCONS_00013507	130.813	4.30333	2.83	0.0666667	-5.40769	0.00133511	0.0266598	yes	AMPH	XP_017902478.1 PREDICTED: amphiphysin [Capra hircus]	Organismal Systems;Cellular Processes	Immune system;Transport and catabolism	ko04144//Endocytosis;ko04666//Fc gamma R-mediated phagocytosis	K12562	GO:0044444//cytoplasmic part;GO:0071944//cell periphery;GO:0043229//intracellular organelle;GO:0043226//organelle;GO:0005623//cell;GO:0044464//cell part;GO:0016023//cytoplasmic, membrane-bounded vesicle;GO:0043227//membrane-bounded organelle;GO:0005622//intracellular;GO:0005737//cytoplasm;GO:0044424//intracellular part;GO:0044459//plasma membrane part;GO:0031982//vesicle;GO:0005886//plasma membra…	-	GO:0007611//learning or memory;GO:0050877//neurological system process;GO:0032501//multicellular organismal process;GO:0050890//cognition;GO:0044708//single-organism behavior;GO:0006810//transport;GO:0044707//single-multicellular organism process;GO:0044699//single-organism process;GO:0003008//system process;GO:0006897//endocytosis;GO:0007610//behavior;GO:0051234//establishment of localization;GO…
TCONS_00013525	1855.57	3.85667	3.32333	0.00666667	-8.96145	3.514e-12	8.86025e-10	yes	-	ELR48758.1 hypothetical protein M91_16623 [Bos mutus]	-	-	-	-	-	-	-
TCONS_00013526	350.27	3.24333	0.693333	0.00333333	-7.70044	0.000259897	0.00715542	yes	-	ELR48758.1 hypothetical protein M91_16623 [Bos mutus]	-	-	-	-	-	-	-
TCONS_00013579	429.33	65.3167	37.9567	4.49333	-3.0785	0.000156787	0.00472502	yes	h2afv	XP_011968542.1 PREDICTED: histone H2A.V isoform X2 [Ovis aries musimon]	-	-	-	-	GO:0044424//intracellular part;GO:0031988//membrane-bounded vesicle;GO:0044464//cell part;GO:0005623//cell;GO:0043231//intracellular membrane-bounded organelle;GO:0043232//intracellular non-membrane-bounded organelle;GO:0005622//intracellular;GO:0043229//intracellular organelle;GO:0031982//vesicle;GO:0043227//membrane-bounded organelle;GO:0043226//organelle;GO:0043228//non-membrane-bounded organe…	GO:1901363//heterocyclic compound binding;GO:0005515//protein binding;GO:0005488//binding;GO:0097159//organic cyclic compound binding;GO:0003676//nucleic acid binding;GO:0046983//protein dimerization activity	-
TCONS_00013776	3135.94	28.13	72.03	0.466667	-7.27006	1.31847e-17	1.47105e-14	yes	AOAH	XP_017902645.1 PREDICTED: acyloxyacyl hydrolase [Capra hircus]	-	-	-	-	-	GO:0016787//hydrolase activity;GO:0016788//hydrolase activity, acting on ester bonds;GO:0052689//carboxylic ester hydrolase activity;GO:0003824//catalytic activity	GO:0044710//single-organism metabolic process;GO:0048583//regulation of response to stimulus;GO:0008152//metabolic process;GO:0080134//regulation of response to stress;GO:0006629//lipid metabolic process;GO:0031348//negative regulation of defense response;GO:0009987//cellular process;GO:0044763//single-organism cellular process;GO:0044237//cellular metabolic process;GO:0044238//primary metabolic …
TCONS_00013782	726.837	130.763	14.71	2.00333	-2.87632	0.000250408	0.00693455	yes	ELMO1	XP_006201961.2 PREDICTED: engulfment and cell motility protein 1 isoform X1 [Vicugna pacos]	Organismal Systems	Immune system	ko04062//Chemokine signaling pathway	K12366	GO:0043228//non-membrane-bounded organelle;GO:0043229//intracellular organelle;GO:0005622//intracellular;GO:0005623//cell;GO:0043226//organelle;GO:0044464//cell part;GO:0016020//membrane;GO:0043232//intracellular non-membrane-bounded organelle;GO:0044424//intracellular part	GO:0005515//protein binding;GO:0019904//protein domain specific binding;GO:0005488//binding	GO:0051179//localization;GO:0050794//regulation of cellular process;GO:0050789//regulation of biological process;GO:0035556//intracellular signal transduction;GO:0044700//single organism signaling;GO:0007265//Ras protein signal transduction;GO:0044699//single-organism process;GO:0010324//membrane invagination;GO:0071840//cellular component organization or biogenesis;GO:0044763//single-organism ce…
TCONS_00013896	673.403	219.763	7.07667	1.66	-2.09189	0.00230346	0.0406585	yes	KMT2E	XP_017902733.1 PREDICTED: histone-lysine N-methyltransferase 2E isoform X1 [Capra hircus]	Metabolism	Amino acid metabolism	ko00310//Lysine degradation	K09189	GO:0035097//histone methyltransferase complex;GO:0044424//intracellular part;GO:0043229//intracellular organelle;GO:0044422//organelle part;GO:0032991//macromolecular complex;GO:0005654//nucleoplasm;GO:0043234//protein complex;GO:0043227//membrane-bounded organelle;GO:0044451//nucleoplasm part;GO:0044446//intracellular organelle part;GO:0034708//methyltransferase complex;GO:0005622//intracellular…	GO:0016278//lysine N-methyltransferase activity;GO:0003824//catalytic activity;GO:0003712//transcription cofactor activity;GO:0043169//cation binding;GO:0046872//metal ion binding;GO:0016740//transferase activity;GO:0005515//protein binding;GO:0008168//methyltransferase activity;GO:0016279//protein-lysine N-methyltransferase activity;GO:0000989//transcription factor activity, transcription factor…	GO:0042221//response to chemical;GO:0071840//cellular component organization or biogenesis;GO:0048518//positive regulation of biological process;GO:1901360//organic cyclic compound metabolic process;GO:0045595//regulation of cell differentiation;GO:2001141//regulation of RNA biosynthetic process;GO:0044260//cellular macromolecule metabolic process;GO:0006725//cellular aromatic compound metabolic …
TCONS_00014037	119.05	0	1.79	0.001	-10.8057	0.000188182	0.00548785	yes	AHR	XP_017902841.1 PREDICTED: aryl hydrocarbon receptor [Capra hircus]	-	-	-	-	-	-	-
TCONS_00014161	13488	2626.73	214.107	26.09	-3.03676	0.000185512	0.00542898	yes	COL1A2	XP_004007775.1 PREDICTED: collagen alpha-2(I) chain isoform X1 [Ovis aries]	Organismal Systems;Environmental Information Processing;Cellular Processes	Immune system;Digestive system;Cellular commiunity;Signaling molecules and interaction;Signal transduction	ko04151//PI3K-Akt signaling pathway;ko04510//Focal adhesion;ko04611//Platelet activation;ko04974//Protein digestion and absorption;ko04512//ECM-receptor interaction	K06236	GO:0043227//membrane-bounded organelle;GO:0005583//fibrillar collagen trimer;GO:0098644//complex of collagen trimers;GO:0031012//extracellular matrix;GO:0044420//extracellular matrix component;GO:0005576//extracellular region;GO:0043234//protein complex;GO:0031982//vesicle;GO:0032991//macromolecular complex;GO:0031988//membrane-bounded vesicle;GO:0005578//proteinaceous extracellular matrix;GO:004…	GO:0005198//structural molecule activity;GO:0005515//protein binding;GO:0005488//binding;GO:0043169//cation binding;GO:0019838//growth factor binding;GO:0043167//ion binding	GO:0043933//macromolecular complex subunit organization;GO:0007178//transmembrane receptor protein serine/threonine kinase signaling pathway;GO:0065007//biological regulation;GO:0010033//response to organic substance;GO:0044700//single organism signaling;GO:0044767//single-organism developmental process;GO:0003008//system process;GO:0008015//blood circulation;GO:0030198//extracellular matrix orga…
TCONS_00014169	143.14	4.80333	1.8	0.04	-5.49185	2.92166e-05	0.00116524	yes	-	XP_005982306.1 PREDICTED: uncharacterized protein LOC102334977 [Pantholops hodgsonii]	-	-	-	-	-	-	-
TCONS_00014700	423.077	3	6.69	0.0366667	-7.51139	8.23743e-09	8.52966e-07	yes	FMNL3	XP_017903314.1 PREDICTED: formin-like protein 3 isoform X5 [Capra hircus]	-	-	-	-	GO:0005622//intracellular;GO:0005623//cell;GO:0044424//intracellular part;GO:0044464//cell part	GO:0031267//small GTPase binding;GO:0019899//enzyme binding;GO:0017016//Ras GTPase binding;GO:0005515//protein binding;GO:0051020//GTPase binding;GO:0005488//binding	GO:0050793//regulation of developmental process;GO:0065007//biological regulation;GO:0006996//organelle organization;GO:0044763//single-organism cellular process;GO:0022604//regulation of cell morphogenesis;GO:0016043//cellular component organization;GO:0022603//regulation of anatomical structure morphogenesis;GO:0050794//regulation of cellular process;GO:0007010//cytoskeleton organization;GO:005…
TCONS_00014719	4482.74	262.22	160.46	8.13667	-4.30163	1.21143e-05	0.000547217	yes	Tuba1a	XP_017306538.1 PREDICTED: tubulin alpha-1A chain-like [Ictalurus punctatus]	Cellular Processes	Cellular commiunity;Transport and catabolism	ko04145//Phagosome;ko04540//Gap junction	K07374	GO:0005768//endosome;GO:0044444//cytoplasmic part;GO:0044446//intracellular organelle part;GO:0031988//membrane-bounded vesicle;GO:0015630//microtubule cytoskeleton;GO:0043232//intracellular non-membrane-bounded organelle;GO:0031982//vesicle;GO:0043231//intracellular membrane-bounded organelle;GO:0043227//membrane-bounded organelle;GO:0099513//polymeric cytoskeletal fiber;GO:0099512//supramolecul…	GO:0016462//pyrophosphatase activity;GO:0032550//purine ribonucleoside binding;GO:1901363//heterocyclic compound binding;GO:0005488//binding;GO:0003824//catalytic activity;GO:0036094//small molecule binding;GO:0046983//protein dimerization activity;GO:0001883//purine nucleoside binding;GO:0005515//protein binding;GO:0016787//hydrolase activity;GO:0016817//hydrolase activity, acting on acid anhydr…	GO:0044763//single-organism cellular process;GO:0044085//cellular component biogenesis;GO:0016043//cellular component organization;GO:0044699//single-organism process;GO:0034622//cellular macromolecular complex assembly;GO:0070271//protein complex biogenesis;GO:0071840//cellular component organization or biogenesis;GO:0043623//cellular protein complex assembly;GO:0071822//protein complex subunit …
TCONS_00014787	2988.72	304.643	45.33	3.71333	-3.60968	2.2954e-06	0.000126941	yes	HDAC7	XP_017903367.1 PREDICTED: histone deacetylase 7 isoform X5 [Capra hircus]	-	-	-	-	GO:0005622//intracellular;GO:0005623//cell;GO:0043226//organelle;GO:0043227//membrane-bounded organelle;GO:0043231//intracellular membrane-bounded organelle;GO:0043229//intracellular organelle;GO:0044464//cell part;GO:0044424//intracellular part	GO:0016810//hydrolase activity, acting on carbon-nitrogen (but not peptide) bonds;GO:0019899//enzyme binding;GO:0003712//transcription cofactor activity;GO:0034979//NAD-dependent protein deacetylase activity;GO:0000989//transcription factor activity, transcription factor binding;GO:0005515//protein binding;GO:0043167//ion binding;GO:0000988//transcription factor activity, protein binding;GO:00199…	GO:0034329//cell junction assembly;GO:0006996//organelle organization;GO:0071840//cellular component organization or biogenesis;GO:0044707//single-multicellular organism process;GO:0019219//regulation of nucleobase-containing compound metabolic process;GO:0051252//regulation of RNA metabolic process;GO:0010468//regulation of gene expression;GO:0008152//metabolic process;GO:0043170//macromolecule …
TCONS_00014871	625.633	3.61	8.40667	0.0366667	-7.84092	1.62485e-15	1.05095e-12	yes	ABCD2	XP_012029897.1 PREDICTED: ATP-binding cassette sub-family D member 2 isoform X1 [Ovis aries]	Environmental Information Processing;Cellular Processes	Membrane transport;Transport and catabolism	ko04146//Peroxisome;ko02010//ABC transporters	K05676	GO:0005622//intracellular;GO:0044425//membrane part;GO:0043226//organelle;GO:0031224//intrinsic component of membrane;GO:0043227//membrane-bounded organelle;GO:0044424//intracellular part;GO:0016020//membrane;GO:0043229//intracellular organelle;GO:0044444//cytoplasmic part;GO:0043231//intracellular membrane-bounded organelle;GO:0005623//cell;GO:0044464//cell part;GO:0042579//microbody;GO:0005737/…	GO:0022804//active transmembrane transporter activity;GO:0016817//hydrolase activity, acting on acid anhydrides;GO:0015405//P-P-bond-hydrolysis-driven transmembrane transporter activity;GO:0005215//transporter activity;GO:0097367//carbohydrate derivative binding;GO:0001882//nucleoside binding;GO:0032550//purine ribonucleoside binding;GO:0015399//primary active transmembrane transporter activity;G…	GO:0044237//cellular metabolic process;GO:0031329//regulation of cellular catabolic process;GO:0009894//regulation of catabolic process;GO:0006082//organic acid metabolic process;GO:0009056//catabolic process;GO:0019222//regulation of metabolic process;GO:0044282//small molecule catabolic process;GO:0016042//lipid catabolic process;GO:0072329//monocarboxylic acid catabolic process;GO:0044281//sma…
TCONS_00015104	334.923	15.32	2.54	0.0933333	-4.76629	1.02395e-06	6.40924e-05	yes	AGAP2	XP_012030037.1 PREDICTED: arf-GAP with GTPase, ANK repeat and PH domain-containing protein 2 isoform X2 [Ovis aries]	Cellular Processes;Environmental Information Processing	Transport and catabolism;Signal transduction	ko04144//Endocytosis;ko04068//FoxO signaling pathway	K17848	GO:0043226//organelle;GO:0031982//vesicle;GO:0043227//membrane-bounded organelle;GO:0044424//intracellular part;GO:0043228//non-membrane-bounded organelle;GO:0031988//membrane-bounded vesicle;GO:0043232//intracellular non-membrane-bounded organelle;GO:0043231//intracellular membrane-bounded organelle;GO:0005622//intracellular;GO:0044464//cell part;GO:0005623//cell;GO:0043229//intracellular organe…	GO:0005488//binding;GO:0043167//ion binding;GO:0019887//protein kinase regulator activity;GO:0036094//small molecule binding;GO:0046914//transition metal ion binding;GO:0030234//enzyme regulator activity;GO:0019899//enzyme binding;GO:0005515//protein binding;GO:0019207//kinase regulator activity;GO:0046872//metal ion binding;GO:0043169//cation binding;GO:0008047//enzyme activator activity;GO:0019…	GO:0044767//single-organism developmental process;GO:0010941//regulation of cell death;GO:0051234//establishment of localization;GO:0048812//neuron projection morphogenesis;GO:0042325//regulation of phosphorylation;GO:0006928//movement of cell or subcellular component;GO:0051239//regulation of multicellular organismal process;GO:0006935//chemotaxis;GO:0097190//apoptotic signaling pathway;GO:00311…
TCONS_00015184	77.5933	0	1.13	0.001	-10.1421	0.000148116	0.0045214	yes	TIMELESS	XP_013819393.2 PREDICTED: protein timeless homolog isoform X2 [Capra hircus]	-	-	-	-	GO:0044446//intracellular organelle part;GO:0005694//chromosome;GO:0043228//non-membrane-bounded organelle;GO:0043229//intracellular organelle;GO:0005622//intracellular;GO:0043232//intracellular non-membrane-bounded organelle;GO:0044422//organelle part;GO:0043231//intracellular membrane-bounded organelle;GO:0044464//cell part;GO:0005623//cell;GO:0000785//chromatin;GO:0043227//membrane-bounded org…	GO:0005515//protein binding;GO:0005488//binding;GO:0046983//protein dimerization activity	GO:0035295//tube development;GO:0065007//biological regulation;GO:0019222//regulation of metabolic process;GO:0010556//regulation of macromolecule biosynthetic process;GO:0022402//cell cycle process;GO:0031323//regulation of cellular metabolic process;GO:0044707//single-multicellular organism process;GO:0033554//cellular response to stress;GO:2001141//regulation of RNA biosynthetic process;GO:004…
TCONS_00015277	539.787	8.69667	19.6567	0.236667	-6.37602	1.37431e-11	2.98649e-09	yes	TESPA1	XP_005680521.1 PREDICTED: protein TESPA1 isoform X2 [Capra hircus]	-	-	-	-	GO:0005623//cell;GO:0044464//cell part;GO:0044424//intracellular part;GO:0005622//intracellular;GO:0043234//protein complex;GO:0032991//macromolecular complex	-	GO:0034110//regulation of homotypic cell-cell adhesion;GO:0002694//regulation of leukocyte activation;GO:0044085//cellular component biogenesis;GO:0045580//regulation of T cell differentiation;GO:0050863//regulation of T cell activation;GO:1903037//regulation of leukocyte cell-cell adhesion;GO:0065003//macromolecular complex assembly;GO:0071840//cellular component organization or biogenesis;GO:00…
TCONS_00015523	277.127	53.5233	16.45	2.32	-2.82589	0.00254931	0.0438601	yes	HMOX1	XP_006074490.1 PREDICTED: heme oxygenase 1 [Bubalus bubalis]	Metabolism;Organismal Systems	Digestive system;Global and Overview;Metabolism of cofactors and vitamins	ko01100//Metabolic pathways;ko01110//Biosynthesis of secondary metabolites;ko04978//Mineral absorption;ko00860//Porphyrin and chlorophyll metabolism	K00510	GO:0044444//cytoplasmic part;GO:0005622//intracellular;GO:0043227//membrane-bounded organelle;GO:0043226//organelle;GO:0005623//cell;GO:0005737//cytoplasm;GO:0044464//cell part;GO:0043231//intracellular membrane-bounded organelle;GO:0044424//intracellular part;GO:0044422//organelle part;GO:0031090//organelle membrane;GO:0043229//intracellular organelle;GO:0016020//membrane	GO:0005515//protein binding;GO:0016491//oxidoreductase activity;GO:0043169//cation binding;GO:0003824//catalytic activity;GO:0046906//tetrapyrrole binding;GO:0060089//molecular transducer activity;GO:0046983//protein dimerization activity;GO:0043167//ion binding;GO:0097159//organic cyclic compound binding;GO:0005488//binding;GO:1901363//heterocyclic compound binding;GO:0016705//oxidoreductase act…	GO:0048518//positive regulation of biological process;GO:0044270//cellular nitrogen compound catabolic process;GO:0046483//heterocycle metabolic process;GO:0044710//single-organism metabolic process;GO:0071822//protein complex subunit organization;GO:0019222//regulation of metabolic process;GO:0019439//aromatic compound catabolic process;GO:0048522//positive regulation of cellular process;GO:1901…
TCONS_00015549	286.017	6.78667	5.60667	0.0966667	-5.85798	7.45074e-08	6.11249e-06	yes	APOL3	XP_017903766.1 PREDICTED: apolipoprotein L3-like [Capra hircus]	-	-	-	-	-	-	-
TCONS_00015720	0	214.487	0.001	1.13667	10.1506	0.00204462	0.0373056	yes	ST8SIA1	XP_004006837.1 PREDICTED: alpha-N-acetylneuraminide alpha-2,8-sialyltransferase [Ovis aries]	Metabolism	Global and Overview;Glycan biosynthesis and metabolism	ko01100//Metabolic pathways;ko00601//Glycosphingolipid biosynthesis - lacto and neolacto series;ko00603//Glycosphingolipid biosynthesis - globo series;ko00604//Glycosphingolipid biosynthesis - ganglio series	K03371	GO:0043227//membrane-bounded organelle;GO:0012505//endomembrane system;GO:0005794//Golgi apparatus;GO:0005622//intracellular;GO:0005623//cell;GO:0005737//cytoplasm;GO:0031300//intrinsic component of organelle membrane;GO:0044444//cytoplasmic part;GO:0031228//intrinsic component of Golgi membrane;GO:0044424//intracellular part;GO:0098588//bounding membrane of organelle;GO:0000139//Golgi membrane;G…	GO:0016757//transferase activity, transferring glycosyl groups;GO:0008373//sialyltransferase activity;GO:0003824//catalytic activity;GO:0016740//transferase activity	GO:0009266//response to temperature stimulus;GO:0044237//cellular metabolic process;GO:0006464//cellular protein modification process;GO:0043170//macromolecule metabolic process;GO:0005975//carbohydrate metabolic process;GO:0043412//macromolecule modification;GO:0044255//cellular lipid metabolic process;GO:0070085//glycosylation;GO:0065007//biological regulation;GO:0019538//protein metabolic proc…
TCONS_00015857	29.1	0	1.35	0.001	-10.3987	0.00171884	0.0323364	yes	CLEC2D	XP_005680916.1 PREDICTED: C-type lectin domain family 2 member F-like [Capra hircus]	-	-	-	-	-	-	-
TCONS_00015858	25.4767	0	0.893333	0.001	-9.80305	0.00261531	0.0447026	yes	-	XP_005680916.1 PREDICTED: C-type lectin domain family 2 member F-like [Capra hircus]	-	-	-	-	-	-	-
TCONS_00015866	1266.66	127.247	5.29333	0.343333	-3.94649	9.1476e-08	7.35084e-06	yes	gag	CAA10770.1 reverse transcriptase-like [Bos taurus]	-	-	-	-	GO:0044464//cell part;GO:0005623//cell;GO:0031252//cell leading edge;GO:0030054//cell junction;GO:0070161//anchoring junction	GO:0008092//cytoskeletal protein binding;GO:0005515//protein binding;GO:0050839//cell adhesion molecule binding;GO:0003779//actin binding;GO:0005488//binding	GO:0007155//cell adhesion;GO:0098602//single organism cell adhesion;GO:0044699//single-organism process;GO:0022610//biological adhesion
TCONS_00015873	835.83	59.0033	2.30667	0.103333	-4.48043	7.31333e-09	7.70287e-07	yes	Clec2h	XP_004007616.2 PREDICTED: C-type lectin domain family 2 member D11-like isoform X1 [Ovis aries]	-	-	-	-	-	-	-
TCONS_00015957	413.42	4.28333	13.1967	0.0866667	-7.25048	0.00104047	0.0219758	yes	C1R	XP_005680978.2 PREDICTED: complement C1r subcomponent [Capra hircus]	Organismal Systems;Cellular Processes	Transport and catabolism;Immune system	ko04145//Phagosome;ko04610//Complement and coagulation cascades	K01330	GO:0043227//membrane-bounded organelle;GO:0005576//extracellular region;GO:0031988//membrane-bounded vesicle;GO:0031982//vesicle;GO:0044421//extracellular region part;GO:0043226//organelle	GO:0005488//binding;GO:0003824//catalytic activity;GO:0016787//hydrolase activity;GO:0043169//cation binding;GO:0043167//ion binding;GO:0046872//metal ion binding	GO:0019538//protein metabolic process;GO:0002252//immune effector process;GO:0044238//primary metabolic process;GO:0008152//metabolic process;GO:0043170//macromolecule metabolic process;GO:0002376//immune system process;GO:0071704//organic substance metabolic process
TCONS_00015995	1306.7	77.3	11.1233	0.526667	-4.40056	3.66042e-08	3.28034e-06	yes	LPAR5	XP_017904063.1 PREDICTED: lysophosphatidic acid receptor 5 [Capra hircus]	Environmental Information Processing	Signal transduction	ko04151//PI3K-Akt signaling pathway;ko04015//Rap1 signaling pathway;ko04072//Phospholipase D signaling pathway	K08390	GO:0031224//intrinsic component of membrane;GO:0044425//membrane part;GO:0016020//membrane	GO:0004871//signal transducer activity	GO:0007154//cell communication;GO:0050789//regulation of biological process;GO:0044763//single-organism cellular process;GO:0050794//regulation of cellular process;GO:0050896//response to stimulus;GO:0009987//cellular process;GO:0044699//single-organism process;GO:0044700//single organism signaling;GO:0007165//signal transduction;GO:0051716//cellular response to stimulus;GO:0023052//signaling;GO:…
TCONS_00016000	1277.38	423.047	13.4433	3.39	-1.98753	0.00262622	0.0448472	yes	CHD4	XP_006065866.1 PREDICTED: chromodomain-helicase-DNA-binding protein 4 isoform X4 [Bubalus bubalis]	-	-	-	-	GO:0044451//nucleoplasm part;GO:0000118//histone deacetylase complex;GO:0043229//intracellular organelle;GO:0044430//cytoskeletal part;GO:0070013//intracellular organelle lumen;GO:0044422//organelle part;GO:0043228//non-membrane-bounded organelle;GO:0043234//protein complex;GO:0043232//intracellular non-membrane-bounded organelle;GO:0032991//macromolecular complex;GO:0043226//organelle;GO:0044446…	GO:0031490//chromatin DNA binding;GO:0044877//macromolecular complex binding;GO:0003690//double-stranded DNA binding;GO:0043565//sequence-specific DNA binding;GO:0015631//tubulin binding;GO:0097159//organic cyclic compound binding;GO:0000975//regulatory region DNA binding;GO:0016818//hydrolase activity, acting on acid anhydrides, in phosphorus-containing anhydrides;GO:0097367//carbohydrate deriva…	GO:0009987//cellular process;GO:0060255//regulation of macromolecule metabolic process;GO:0006338//chromatin remodeling;GO:0043933//macromolecular complex subunit organization;GO:0071840//cellular component organization or biogenesis;GO:0006461//protein complex assembly;GO:0016568//chromatin modification;GO:0070271//protein complex biogenesis;GO:0071822//protein complex subunit organization;GO:00…
TCONS_00016073	619.343	11.08	11.53	0.166667	-6.11228	1.08737e-09	1.3834e-07	yes	Foxm1	XP_011995918.1 PREDICTED: forkhead box protein M1 isoform X1 [Ovis aries musimon]	-	-	-	-	-	-	-
TCONS_00016154	1585.55	158.963	4.98333	0.366667	-3.76457	4.01744e-07	2.7884e-05	yes	CACNA1C	XP_017904188.1 PREDICTED: voltage-dependent L-type calcium channel subunit alpha-1C isoform X9 [Capra hircus]	Organismal Systems;Environmental Information Processing	Circulatory system;Endocrine system;Signal transduction;Environmental adaptation;Nervous system;Sensory system	ko04010//MAPK signaling pathway;ko04024//cAMP signaling pathway;ko04020//Calcium signaling pathway;ko04921//Oxytocin signaling pathway;ko04022//cGMP - PKG signaling pathway;ko04261//Adrenergic signaling in cardiomyocytes;ko04270//Vascular smooth muscle contraction;ko04728//Dopaminergic synapse;ko04724//Glutamatergic synapse;ko04726//Serotonergic synapse;ko04725//Cholinergic synapse;ko04713//Circa…	K04850	-	-	-
TCONS_00016155	0	39.6367	0.001	0.22	7.78136	0.00264807	0.0451244	yes	CACNA1C	XP_017904183.1 PREDICTED: voltage-dependent L-type calcium channel subunit alpha-1C isoform X4 [Capra hircus]	Organismal Systems;Environmental Information Processing	Environmental adaptation;Nervous system;Sensory system;Signal transduction;Endocrine system;Circulatory system	ko04010//MAPK signaling pathway;ko04024//cAMP signaling pathway;ko04020//Calcium signaling pathway;ko04921//Oxytocin signaling pathway;ko04022//cGMP - PKG signaling pathway;ko04261//Adrenergic signaling in cardiomyocytes;ko04270//Vascular smooth muscle contraction;ko04728//Dopaminergic synapse;ko04724//Glutamatergic synapse;ko04726//Serotonergic synapse;ko04725//Cholinergic synapse;ko04713//Circa…	K04850	GO:1902495//transmembrane transporter complex;GO:0043234//protein complex;GO:0043232//intracellular non-membrane-bounded organelle;GO:0044464//cell part;GO:1990351//transporter complex;GO:0034703//cation channel complex;GO:0044449//contractile fiber part;GO:0016021//integral component of membrane;GO:0032991//macromolecular complex;GO:0044456//synapse part;GO:0043292//contractile fiber;GO:0097458/…	GO:0072509//divalent inorganic cation transmembrane transporter activity;GO:0022803//passive transmembrane transporter activity;GO:0022857//transmembrane transporter activity;GO:0015075//ion transmembrane transporter activity;GO:0015267//channel activity;GO:0046873//metal ion transmembrane transporter activity;GO:0008324//cation transmembrane transporter activity;GO:0005262//calcium channel activ…	GO:0051480//regulation of cytosolic calcium ion concentration;GO:0030001//metal ion transport;GO:0019725//cellular homeostasis;GO:0072511//divalent inorganic cation transport;GO:0006811//ion transport;GO:0009416//response to light stimulus;GO:0044707//single-multicellular organism process;GO:0055085//transmembrane transport;GO:0071705//nitrogen compound transport;GO:0055082//cellular chemical hom…
TCONS_00016241	291.037	30.92	9.21	0.743333	-3.63112	8.09479e-05	0.00274516	yes	APOBEC3C	XP_006071499.1 PREDICTED: uncharacterized protein LOC102405577 [Bubalus bubalis]	-	-	-	-	-	GO:0046872//metal ion binding;GO:0046914//transition metal ion binding;GO:0043167//ion binding;GO:0016810//hydrolase activity, acting on carbon-nitrogen (but not peptide) bonds;GO:0016787//hydrolase activity;GO:0043169//cation binding;GO:0005488//binding;GO:0003824//catalytic activity	GO:0032502//developmental process;GO:0048513//animal organ development;GO:0007275//multicellular organism development;GO:0048534//hematopoietic or lymphoid organ development;GO:0002520//immune system development;GO:0032501//multicellular organismal process;GO:0002376//immune system process;GO:0048731//system development;GO:0044699//single-organism process;GO:0048856//anatomical structure developm…
TCONS_00016266	93.0167	1.48667	0.603333	0.00666667	-6.49985	0.000193187	0.00560219	yes	Cacna1i	XP_017904284.1 PREDICTED: LOW QUALITY PROTEIN: voltage-dependent T-type calcium channel subunit alpha-1I [Capra hircus]	Organismal Systems;Environmental Information Processing	Endocrine system;Signal transduction;Environmental adaptation	ko04010//MAPK signaling pathway;ko04020//Calcium signaling pathway;ko04713//Circadian entrainment;ko04925//Aldosterone synthesis and secretion	K04856	-	-	-
TCONS_00016379	789.61	17.3433	12.8267	0.23	-5.80137	2.13786e-06	0.000119562	yes	PARVB	XP_005958527.1 PREDICTED: beta-parvin isoform X1 [Pantholops hodgsonii]	Cellular Processes	Cellular commiunity	ko04510//Focal adhesion	K06275	GO:0044464//cell part;GO:0005912//adherens junction;GO:0031252//cell leading edge;GO:0070161//anchoring junction;GO:0030054//cell junction;GO:0030055//cell-substrate junction;GO:0005924//cell-substrate adherens junction;GO:0005623//cell	-	GO:0071840//cellular component organization or biogenesis;GO:1902589//single-organism organelle organization;GO:0009987//cellular process;GO:0030030//cell projection organization;GO:0006996//organelle organization;GO:0030036//actin cytoskeleton organization;GO:0022610//biological adhesion;GO:0007163//establishment or maintenance of cell polarity;GO:0016043//cellular component organization;GO:0044…
TCONS_00016445	1286.11	156.51	7.74333	0.63	-3.61953	1.28352e-07	9.97947e-06	yes	Clec2d11	XP_017904415.1 PREDICTED: C-type lectin domain family 2 member E [Capra hircus]	-	-	-	-	-	-	-
TCONS_00016446	2155.49	388.413	13.4633	1.58333	-3.088	3.65926e-06	0.000191453	yes	Clec2d11	XP_012770936.1 hypothetical protein, conserved [Babesia bigemina]	-	-	-	-	-	GO:0005515//protein binding;GO:0005488//binding	GO:0022610//biological adhesion;GO:0007155//cell adhesion
TCONS_00016486	206.8	28.2933	13.2267	1.43667	-3.20265	0.00245976	0.0426814	yes	SBF1	XP_011965340.1 PREDICTED: myotubularin-related protein 5 isoform X2 [Ovis aries musimon]	-	-	-	-	GO:0005623//cell;GO:0044464//cell part;GO:0043227//membrane-bounded organelle;GO:0043229//intracellular organelle;GO:0031224//intrinsic component of membrane;GO:0044424//intracellular part;GO:0005622//intracellular;GO:0016020//membrane;GO:0044425//membrane part;GO:0043226//organelle;GO:0043231//intracellular membrane-bounded organelle	GO:0016787//hydrolase activity;GO:0042578//phosphoric ester hydrolase activity;GO:0004721//phosphoprotein phosphatase activity;GO:0005088//Ras guanyl-nucleotide exchange factor activity;GO:0016788//hydrolase activity, acting on ester bonds;GO:0098772//molecular function regulator;GO:0003824//catalytic activity;GO:0016791//phosphatase activity;GO:0005085//guanyl-nucleotide exchange factor activity	GO:0007276//gamete generation;GO:0050789//regulation of biological process;GO:0019953//sexual reproduction;GO:0044699//single-organism process;GO:0019222//regulation of metabolic process;GO:0009987//cellular process;GO:0048232//male gamete generation;GO:0044703//multi-organism reproductive process;GO:0006793//phosphorus metabolic process;GO:0036211//protein modification process;GO:0006464//cellul…
TCONS_00016712	4274.71	1379.23	68.1733	16.6333	-2.03513	0.00127829	0.0258022	yes	BTG1	NP_776424.1 protein BTG1 [Bos taurus]	Genetic Information Processing	Folding, sorting and degradation	ko03018//RNA degradation	K14443	GO:0005623//cell;GO:0005622//intracellular;GO:0043231//intracellular membrane-bounded organelle;GO:0044424//intracellular part;GO:0043226//organelle;GO:0044464//cell part;GO:0043227//membrane-bounded organelle;GO:0043229//intracellular organelle	GO:0005515//protein binding;GO:0019899//enzyme binding;GO:0005488//binding	GO:0045765//regulation of angiogenesis;GO:0065007//biological regulation;GO:0006464//cellular protein modification process;GO:0019538//protein metabolic process;GO:0019222//regulation of metabolic process;GO:0051147//regulation of muscle cell differentiation;GO:0043068//positive regulation of programmed cell death;GO:0043412//macromolecule modification;GO:0010033//response to organic substance;GO…
TCONS_00017036	148.93	0.52	2.59333	0.00666667	-8.60363	1.75351e-06	0.000101765	yes	ASIC1	XP_004778896.1 PREDICTED: acid-sensing ion channel 1 isoform X3 [Mustela putorius furo]	Organismal Systems	Sensory system	ko04750//Inflammatory mediator regulation of TRP channels	K04829	GO:0016020//membrane;GO:0031224//intrinsic component of membrane;GO:0044425//membrane part;GO:0016021//integral component of membrane	GO:0022892//substrate-specific transporter activity;GO:0005272//sodium channel activity;GO:0005216//ion channel activity;GO:0015075//ion transmembrane transporter activity;GO:0022857//transmembrane transporter activity;GO:0022890//inorganic cation transmembrane transporter activity;GO:0005215//transporter activity;GO:0022836//gated channel activity;GO:0015077//monovalent inorganic cation transmem…	GO:0044699//single-organism process;GO:0065008//regulation of biological quality;GO:0006816//calcium ion transport;GO:0010646//regulation of cell communication;GO:0009628//response to abiotic stimulus;GO:0009268//response to pH;GO:0070838//divalent metal ion transport;GO:0050794//regulation of cellular process;GO:0006814//sodium ion transport;GO:0032501//multicellular organismal process;GO:006034…
TCONS_00017043	0.0133333	109.113	0.001	1.9	10.8918	0.00126136	0.0255414	yes	TMBIM6	XP_008510845.1 PREDICTED: bax inhibitor 1 [Equus przewalskii]	-	-	-	-	GO:0005623//cell;GO:0043229//intracellular organelle;GO:0016020//membrane;GO:0031224//intrinsic component of membrane;GO:0043227//membrane-bounded organelle;GO:0044425//membrane part;GO:0005622//intracellular;GO:0043226//organelle;GO:0043231//intracellular membrane-bounded organelle;GO:0044424//intracellular part;GO:0044464//cell part	-	GO:0010033//response to organic substance;GO:0009987//cellular process;GO:0042221//response to chemical;GO:0035966//response to topologically incorrect protein;GO:0048583//regulation of response to stimulus;GO:0009966//regulation of signal transduction;GO:0055082//cellular chemical homeostasis;GO:0065007//biological regulation;GO:1902531//regulation of intracellular signal transduction;GO:2001242…
TCONS_00017064	32.5433	0	0.946667	0.001	-9.88671	0.00116845	0.0240641	yes	TROAP	XP_017903327.1 PREDICTED: tastin isoform X1 [Capra hircus]	-	-	-	-	-	-	-
TCONS_00017214	30.8233	0	0.84	0.001	-9.71425	0.00192782	0.0355277	yes	CNOT2	XP_019807777.1 PREDICTED: CCR4-NOT transcription complex subunit 2 isoform X3 [Tursiops truncatus]	Genetic Information Processing	Folding, sorting and degradation	ko03018//RNA degradation	K12605	GO:0043227//membrane-bounded organelle;GO:0043231//intracellular membrane-bounded organelle;GO:0043229//intracellular organelle;GO:0032991//macromolecular complex;GO:0043234//protein complex;GO:0044464//cell part;GO:0005623//cell;GO:0005622//intracellular;GO:0044424//intracellular part;GO:0043226//organelle	GO:0003824//catalytic activity;GO:0016787//hydrolase activity;GO:0004518//nuclease activity;GO:0005488//binding;GO:0000175//3'-5'-exoribonuclease activity;GO:0001222//transcription corepressor binding;GO:0016796//exonuclease activity, active with either ribo- or deoxyribonucleic acids and producing 5'-phosphomonoesters;GO:0005515//protein binding;GO:0001221//transcription cofactor binding;GO:0016…	GO:0044237//cellular metabolic process;GO:0098727//maintenance of cell number;GO:0006807//nitrogen compound metabolic process;GO:0044087//regulation of cellular component biogenesis;GO:0019222//regulation of metabolic process;GO:0044238//primary metabolic process;GO:0050794//regulation of cellular process;GO:0046483//heterocycle metabolic process;GO:0044707//single-multicellular organism process;…
TCONS_00018210	116.713	9.3	1.46333	0.0733333	-4.31865	0.00138971	0.027431	yes	-	ELR51705.1 hypothetical protein M91_10420, partial [Bos mutus]	-	-	-	-	-	-	-
TCONS_00018262	6.88333	1698.14	0.146667	21.8033	7.21586	0.000119111	0.0037943	yes	OVOS2	XP_017904606.1 PREDICTED: LOW QUALITY PROTEIN: ovostatin homolog 2 [Capra hircus]	-	-	-	-	GO:0005576//extracellular region;GO:0044421//extracellular region part	-	GO:0050790//regulation of catalytic activity;GO:0010466//negative regulation of peptidase activity;GO:0080090//regulation of primary metabolic process;GO:0045861//negative regulation of proteolysis;GO:0050794//regulation of cellular process;GO:0050789//regulation of biological process;GO:0048519//negative regulation of biological process;GO:0031323//regulation of cellular metabolic process;GO:004…
TCONS_00018265	0	705.443	0.001	7.85	12.9385	1.55998e-05	0.0006779	yes	OVOS2	XP_017904606.1 PREDICTED: LOW QUALITY PROTEIN: ovostatin homolog 2 [Capra hircus]	-	-	-	-	GO:0005576//extracellular region;GO:0044421//extracellular region part	-	GO:0080090//regulation of primary metabolic process;GO:0050790//regulation of catalytic activity;GO:0044092//negative regulation of molecular function;GO:0052547//regulation of peptidase activity;GO:0048519//negative regulation of biological process;GO:0010466//negative regulation of peptidase activity;GO:0051346//negative regulation of hydrolase activity;GO:0045861//negative regulation of proteo…
TCONS_00018335	98.13	0	1.00667	0.001	-9.97537	4.3499e-06	0.000225211	yes	GPR162	XP_017904045.1 PREDICTED: probable G-protein coupled receptor 162 [Capra hircus]	-	-	-	-	-	-	-
TCONS_00018342	2462.41	689.04	200.873	44.17	-2.18515	0.00110959	0.0231078	yes	PTMS	XP_015396316.1 PREDICTED: parathymosin isoform X1 [Panthera tigris altaica]	-	-	-	-	-	-	-
TCONS_00018353	2205	0	26.0733	0.001	-14.6703	3.99607e-19	7.43086e-16	yes	NCAPD2	XP_017904081.1 PREDICTED: condensin complex subunit 1 [Capra hircus]	-	-	-	-	GO:0005634//nucleus;GO:0044464//cell part;GO:0000793//condensed chromosome;GO:0043229//intracellular organelle;GO:0043232//intracellular non-membrane-bounded organelle;GO:0043227//membrane-bounded organelle;GO:0044424//intracellular part;GO:0043231//intracellular membrane-bounded organelle;GO:0005623//cell;GO:0043226//organelle;GO:0005622//intracellular;GO:0005694//chromosome;GO:0043228//non-memb…	-	GO:0016043//cellular component organization;GO:0044699//single-organism process;GO:0009987//cellular process;GO:0007049//cell cycle;GO:0006996//organelle organization;GO:0051276//chromosome organization;GO:0048285//organelle fission;GO:0000280//nuclear division;GO:0022402//cell cycle process;GO:0071840//cellular component organization or biogenesis;GO:0044763//single-organism cellular process
TCONS_00018359	3298.37	606.68	82.17	11.81	-2.7986	3.45103e-05	0.00134395	yes	CD27	XP_005681032.1 PREDICTED: CD27 antigen isoform X2 [Capra hircus]	Environmental Information Processing	Signaling molecules and interaction	ko04060//Cytokine-cytokine receptor interaction	K05144	GO:0031982//vesicle;GO:0043226//organelle;GO:0031988//membrane-bounded vesicle;GO:0005623//cell;GO:0044464//cell part;GO:0043227//membrane-bounded organelle	GO:0004869//cysteine-type endopeptidase inhibitor activity;GO:0004857//enzyme inhibitor activity;GO:0061135//endopeptidase regulator activity;GO:0004866//endopeptidase inhibitor activity;GO:0030234//enzyme regulator activity;GO:0030414//peptidase inhibitor activity;GO:0061134//peptidase regulator activity;GO:0098772//molecular function regulator	GO:0048584//positive regulation of response to stimulus;GO:0010562//positive regulation of phosphorus metabolic process;GO:0044700//single organism signaling;GO:0048522//positive regulation of cellular process;GO:0032270//positive regulation of cellular protein metabolic process;GO:0007165//signal transduction;GO:0050789//regulation of biological process;GO:0043066//negative regulation of apoptot…
TCONS_00018379	101.877	2.87667	0.883333	0.02	-5.46489	0.000664779	0.0153476	yes	KCNA1	XP_014961913.1 PREDICTED: potassium voltage-gated channel subfamily A member 1 isoform X2 [Ovis aries musimon]	-	-	-	-	GO:0044463//cell projection part;GO:0043005//neuron projection;GO:0005623//cell;GO:0034702//ion channel complex;GO:0030424//axon;GO:0031224//intrinsic component of membrane;GO:0034703//cation channel complex;GO:0097458//neuron part;GO:0098796//membrane protein complex;GO:0044297//cell body;GO:0034705//potassium channel complex;GO:0016021//integral component of membrane;GO:0044425//membrane part;G…	GO:0046873//metal ion transmembrane transporter activity;GO:0022838//substrate-specific channel activity;GO:0022892//substrate-specific transporter activity;GO:0022803//passive transmembrane transporter activity;GO:0022857//transmembrane transporter activity;GO:0015075//ion transmembrane transporter activity;GO:0008324//cation transmembrane transporter activity;GO:0005267//potassium channel activ…	GO:0071822//protein complex subunit organization;GO:0006812//cation transport;GO:0051259//protein oligomerization;GO:0065003//macromolecular complex assembly;GO:0070271//protein complex biogenesis;GO:0006461//protein complex assembly;GO:0051234//establishment of localization;GO:0071840//cellular component organization or biogenesis;GO:0043933//macromolecular complex subunit organization;GO:001604…
TCONS_00018831	1325.46	214.983	40.7933	5.32333	-2.93793	6.46661e-05	0.00228865	yes	Sbf1	XP_011965343.1 PREDICTED: myotubularin-related protein 5 isoform X4 [Ovis aries musimon]	-	-	-	-	-	GO:0016787//hydrolase activity;GO:0005088//Ras guanyl-nucleotide exchange factor activity;GO:0098772//molecular function regulator;GO:0003824//catalytic activity;GO:0005085//guanyl-nucleotide exchange factor activity;GO:0042578//phosphoric ester hydrolase activity;GO:0016788//hydrolase activity, acting on ester bonds	GO:0008152//metabolic process;GO:0044237//cellular metabolic process;GO:0050790//regulation of catalytic activity;GO:0006796//phosphate-containing compound metabolic process;GO:0050789//regulation of biological process;GO:0006793//phosphorus metabolic process;GO:0065007//biological regulation;GO:0065009//regulation of molecular function;GO:0019222//regulation of metabolic process;GO:0051336//regu…
TCONS_00018867	280.82	75.8633	3.31667	0.626667	-2.40396	0.00268813	0.0455807	yes	BBS7	XP_005681312.2 PREDICTED: Bardet-Biedl syndrome 7 protein [Capra hircus]	-	-	-	-	GO:0043229//intracellular organelle;GO:0044422//organelle part;GO:0044463//cell projection part;GO:0005815//microtubule organizing center;GO:0043227//membrane-bounded organelle;GO:0005622//intracellular;GO:0005856//cytoskeleton;GO:0044424//intracellular part;GO:0044446//intracellular organelle part;GO:0044464//cell part;GO:0043226//organelle;GO:0015630//microtubule cytoskeleton;GO:0043231//intrac…	-	GO:0044707//single-multicellular organism process;GO:0007399//nervous system development;GO:0044699//single-organism process;GO:0009896//positive regulation of catabolic process;GO:0050794//regulation of cellular process;GO:2001141//regulation of RNA biosynthetic process;GO:0031325//positive regulation of cellular metabolic process;GO:1902589//single-organism organelle organization;GO:0000902//ce…
TCONS_00018910	156.74	19.9967	13.6233	1.21	-3.493	0.00113827	0.0235839	yes	MAD2L1	XP_002815141.1 PREDICTED: mitotic spindle assembly checkpoint protein MAD2A [Pongo abelii]	Organismal Systems;Cellular Processes	Endocrine system;Cell growth and death	ko04110//Cell cycle;ko04114//Oocyte meiosis;ko04914//Progesterone-mediated oocyte maturation	K02537	GO:0044422//organelle part;GO:0044446//intracellular organelle part;GO:0043231//intracellular membrane-bounded organelle;GO:0044427//chromosomal part;GO:0043229//intracellular organelle;GO:0043226//organelle;GO:0044430//cytoskeletal part;GO:0043228//non-membrane-bounded organelle;GO:0043234//protein complex;GO:0044464//cell part;GO:0005623//cell;GO:0043227//membrane-bounded organelle;GO:0016021//…	GO:0005515//protein binding;GO:0046983//protein dimerization activity;GO:0005488//binding	GO:1903362//regulation of cellular protein catabolic process;GO:0045931//positive regulation of mitotic cell cycle;GO:0031329//regulation of cellular catabolic process;GO:1903050//regulation of proteolysis involved in cellular protein catabolic process;GO:0009987//cellular process;GO:0009895//negative regulation of catabolic process;GO:0031577//spindle checkpoint;GO:0031324//negative regulation o…
TCONS_00019071	30.87	0	0.766667	0.001	-9.58246	0.0023891	0.0416986	yes	PAPSS1	XP_005681387.2 PREDICTED: bifunctional 3'-phosphoadenosine 5'-phosphosulfate synthase 1 isoform X1 [Capra hircus]	Metabolism	Global and Overview;Energy metabolism;Metabolism of other amino acids;Nucleotide metabolism	ko01100//Metabolic pathways;ko00230//Purine metabolism;ko01130//Biosynthesis of antibiotics;ko01120//Microbial metabolism in diverse environments;ko00450//Selenocompound metabolism;ko00920//Sulfur metabolism	K13811	-	-	-
TCONS_00019209	232.29	13.7067	5.67	0.236667	-4.58242	0.000280209	0.00761135	yes	Tspan5	ELR45770.1 Tetraspanin-5, partial [Bos mutus]	-	-	-	-	GO:0044425//membrane part;GO:0031224//intrinsic component of membrane;GO:0016020//membrane	GO:0005515//protein binding;GO:0005488//binding	GO:0023051//regulation of signaling;GO:0044699//single-organism process;GO:0016043//cellular component organization;GO:1902578//single-organism localization;GO:0034613//cellular protein localization;GO:0008152//metabolic process;GO:0051641//cellular localization;GO:0090150//establishment of protein localization to membrane;GO:0043170//macromolecule metabolic process;GO:0072657//protein localizati…
TCONS_00019292	5.91667	184.277	0.123333	2.32	4.23349	0.00261244	0.0446709	yes	GBA3	XP_004009786.1 PREDICTED: cytosolic beta-glucosidase isoform X2 [Ovis aries]	Metabolism	Carbohydrate metabolism;Global and Overview;Metabolism of other amino acids	ko01100//Metabolic pathways;ko01110//Biosynthesis of secondary metabolites;ko00500//Starch and sucrose metabolism;ko00460//Cyanoamino acid metabolism	K05350	-	-	GO:0008152//metabolic process;GO:0044238//primary metabolic process
TCONS_00019429	269.22	35.37	3.84333	0.383333	-3.32569	0.000260312	0.00716243	yes	RHOH	XP_003364774.1 PREDICTED: rho-related GTP-binding protein RhoH [Equus caballus]	Organismal Systems	Immune system	ko04670//Leukocyte transendothelial migration	K07873	GO:0044444//cytoplasmic part;GO:0005623//cell;GO:0016020//membrane;GO:0005622//intracellular;GO:0005737//cytoplasm;GO:0044459//plasma membrane part;GO:0005886//plasma membrane;GO:0044424//intracellular part;GO:0044464//cell part;GO:0044425//membrane part;GO:0071944//cell periphery	GO:0031267//small GTPase binding;GO:0032549//ribonucleoside binding;GO:0005515//protein binding;GO:0001883//purine nucleoside binding;GO:0051020//GTPase binding;GO:0097367//carbohydrate derivative binding;GO:0005488//binding;GO:1901363//heterocyclic compound binding;GO:0098772//molecular function regulator;GO:0019899//enzyme binding;GO:0036094//small molecule binding;GO:0097159//organic cyclic co…	GO:0046649//lymphocyte activation;GO:0042325//regulation of phosphorylation;GO:0043122//regulation of I-kappaB kinase/NF-kappaB signaling;GO:0002521//leukocyte differentiation;GO:0009987//cellular process;GO:0030098//lymphocyte differentiation;GO:0050794//regulation of cellular process;GO:0048583//regulation of response to stimulus;GO:0002274//myeloid leukocyte activation;GO:0044763//single-organ…
TCONS_00019436	1829.27	107.5	28.03	1.22	-4.52202	0.00015075	0.00457986	yes	RHOH	XP_003364774.1 PREDICTED: rho-related GTP-binding protein RhoH [Equus caballus]	Organismal Systems	Immune system	ko04670//Leukocyte transendothelial migration	K07873	GO:0005886//plasma membrane;GO:0044444//cytoplasmic part;GO:0016020//membrane;GO:0044425//membrane part;GO:0071944//cell periphery;GO:0044459//plasma membrane part;GO:0005622//intracellular;GO:0005737//cytoplasm;GO:0044424//intracellular part;GO:0005623//cell;GO:0044464//cell part	GO:0017016//Ras GTPase binding;GO:0031267//small GTPase binding;GO:0036094//small molecule binding;GO:1901363//heterocyclic compound binding;GO:0004857//enzyme inhibitor activity;GO:0051020//GTPase binding;GO:0032550//purine ribonucleoside binding;GO:0001883//purine nucleoside binding;GO:0097367//carbohydrate derivative binding;GO:0005488//binding;GO:0030234//enzyme regulator activity;GO:0032549/…	GO:0031323//regulation of cellular metabolic process;GO:0032502//developmental process;GO:0044763//single-organism cellular process;GO:0051174//regulation of phosphorus metabolic process;GO:0023051//regulation of signaling;GO:0009892//negative regulation of metabolic process;GO:0048583//regulation of response to stimulus;GO:0010646//regulation of cell communication;GO:0001775//cell activation;GO:…
TCONS_00019495	0	157.02	0.001	6.58	12.6839	0.000291781	0.0078825	yes	Ociad1	XP_006057564.1 PREDICTED: OCIA domain-containing protein 1 isoform X4 [Bubalus bubalis]	-	-	-	-	GO:0005623//cell;GO:0005622//intracellular;GO:0043226//organelle;GO:0043229//intracellular organelle;GO:0043227//membrane-bounded organelle;GO:0044424//intracellular part;GO:0043231//intracellular membrane-bounded organelle;GO:0044464//cell part	-	-
TCONS_00020001	0	124.61	0.001	1.3	10.3443	1.18272e-05	0.000535873	yes	SORCS2	XP_017905263.1 PREDICTED: VPS10 domain-containing receptor SorCS2 [Capra hircus]	-	-	-	-	GO:0016020//membrane;GO:0031224//intrinsic component of membrane;GO:0044425//membrane part	GO:0004888//transmembrane signaling receptor activity;GO:0060089//molecular transducer activity;GO:0099600//transmembrane receptor activity;GO:0001653//peptide receptor activity;GO:0004872//receptor activity;GO:0008528//G-protein coupled peptide receptor activity;GO:0038023//signaling receptor activity;GO:0004871//signal transducer activity;GO:0004930//G-protein coupled receptor activity	GO:0044699//single-organism process;GO:0051716//cellular response to stimulus;GO:0007154//cell communication;GO:0007165//signal transduction;GO:0007186//G-protein coupled receptor signaling pathway;GO:0023052//signaling;GO:0050896//response to stimulus;GO:0050794//regulation of cellular process;GO:0044700//single organism signaling;GO:0065007//biological regulation;GO:0044763//single-organism cel…
TCONS_00020016	64.2133	0	0.883333	0.001	-9.78681	0.000102963	0.00336639	yes	SORCS2	XP_017905263.1 PREDICTED: VPS10 domain-containing receptor SorCS2 [Capra hircus]	-	-	-	-	GO:0031224//intrinsic component of membrane;GO:0044425//membrane part;GO:0016020//membrane	GO:0060089//molecular transducer activity;GO:0004871//signal transducer activity;GO:0004872//receptor activity;GO:0001653//peptide receptor activity;GO:0099600//transmembrane receptor activity;GO:0004930//G-protein coupled receptor activity;GO:0004888//transmembrane signaling receptor activity;GO:0008528//G-protein coupled peptide receptor activity;GO:0038023//signaling receptor activity	GO:0050794//regulation of cellular process;GO:0050789//regulation of biological process;GO:0044700//single organism signaling;GO:0051716//cellular response to stimulus;GO:0007154//cell communication;GO:0009987//cellular process;GO:0044699//single-organism process;GO:0007186//G-protein coupled receptor signaling pathway;GO:0044763//single-organism cellular process;GO:0023052//signaling;GO:0050896/…
TCONS_00020056	87.5567	0.726667	0.86	0.00333333	-8.01123	0.000105051	0.00342463	yes	Dok7	XP_017905418.1 PREDICTED: protein Dok-7 [Capra hircus]	-	-	-	-	GO:0045202//synapse	GO:0019899//enzyme binding;GO:0005515//protein binding;GO:0005543//phospholipid binding;GO:0008289//lipid binding;GO:0005488//binding;GO:0019900//kinase binding;GO:0043168//anion binding;GO:0043167//ion binding	GO:1902580//single-organism cellular localization;GO:0031323//regulation of cellular metabolic process;GO:0051246//regulation of protein metabolic process;GO:0044763//single-organism cellular process;GO:0044093//positive regulation of molecular function;GO:0001934//positive regulation of protein phosphorylation;GO:0009893//positive regulation of metabolic process;GO:0051247//positive regulation o…
TCONS_00020057	158.11	7.18667	14.1367	0.526667	-4.74641	0.000334491	0.00884883	yes	TACC3	XP_017905295.1 PREDICTED: transforming acidic coiled-coil-containing protein 3 [Capra hircus]	Genetic Information Processing	Translation	ko03013//RNA transport	K14283	GO:0044464//cell part;GO:0044430//cytoskeletal part;GO:0044446//intracellular organelle part;GO:0043228//non-membrane-bounded organelle;GO:0005623//cell;GO:0044422//organelle part;GO:0005815//microtubule organizing center;GO:0005622//intracellular;GO:0005856//cytoskeleton;GO:0044424//intracellular part;GO:0015630//microtubule cytoskeleton;GO:0043232//intracellular non-membrane-bounded organelle;G…	GO:0005488//binding;GO:0005515//protein binding	GO:0051640//organelle localization;GO:1903533//regulation of protein targeting;GO:0065007//biological regulation;GO:1903650//negative regulation of cytoplasmic transport;GO:0048856//anatomical structure development;GO:1903827//regulation of cellular protein localization;GO:0044767//single-organism developmental process;GO:0007010//cytoskeleton organization;GO:0032387//negative regulation of intra…
TCONS_00020061	673.643	74.58	16.8367	1.48667	-3.50145	1.12265e-05	0.000512298	yes	WHSC1	XP_017905306.1 PREDICTED: histone-lysine N-methyltransferase NSD2 isoform X2 [Capra hircus]	Metabolism	Amino acid metabolism	ko00310//Lysine degradation	K11424	GO:0043226//organelle;GO:0043229//intracellular organelle;GO:0043228//non-membrane-bounded organelle;GO:0005623//cell;GO:0016020//membrane;GO:0031090//organelle membrane;GO:0044464//cell part;GO:0043232//intracellular non-membrane-bounded organelle;GO:0044422//organelle part;GO:0005622//intracellular;GO:0044424//intracellular part;GO:0043231//intracellular membrane-bounded organelle;GO:0043227//m…	GO:0003676//nucleic acid binding;GO:0043169//cation binding;GO:0005488//binding;GO:0016279//protein-lysine N-methyltransferase activity;GO:0008757//S-adenosylmethionine-dependent methyltransferase activity;GO:0008168//methyltransferase activity;GO:0043167//ion binding;GO:0016741//transferase activity, transferring one-carbon groups;GO:1901363//heterocyclic compound binding;GO:0046872//metal ion b…	GO:0065007//biological regulation;GO:0072358//cardiovascular system development;GO:0045935//positive regulation of nucleobase-containing compound metabolic process;GO:0080090//regulation of primary metabolic process;GO:0048513//animal organ development;GO:0003283//atrial septum development;GO:0044699//single-organism process;GO:0044260//cellular macromolecule metabolic process;GO:0002705//positiv…
TCONS_00020063	288.39	51.7967	2.52333	0.333333	-2.92029	0.000657805	0.015211	yes	WHSC1	XP_017905307.1 PREDICTED: histone-lysine N-methyltransferase NSD2 isoform X3 [Capra hircus]	Metabolism	Amino acid metabolism	ko00310//Lysine degradation	K11424	GO:0005622//intracellular;GO:0043231//intracellular membrane-bounded organelle;GO:0044424//intracellular part;GO:0031090//organelle membrane;GO:0043232//intracellular non-membrane-bounded organelle;GO:0044422//organelle part;GO:0043229//intracellular organelle;GO:0043226//organelle;GO:0043228//non-membrane-bounded organelle;GO:0044464//cell part;GO:0016020//membrane;GO:0005623//cell;GO:0043227//m…	GO:0005488//binding;GO:0016740//transferase activity;GO:1901363//heterocyclic compound binding;GO:0003677//DNA binding;GO:0003824//catalytic activity;GO:0043169//cation binding;GO:0003676//nucleic acid binding;GO:0043167//ion binding;GO:0046914//transition metal ion binding;GO:0016279//protein-lysine N-methyltransferase activity;GO:0008757//S-adenosylmethionine-dependent methyltransferase activit…	GO:0051052//regulation of DNA metabolic process;GO:0048856//anatomical structure development;GO:0002821//positive regulation of adaptive immune response;GO:0050865//regulation of cell activation;GO:0016570//histone modification;GO:0044699//single-organism process;GO:0002714//positive regulation of B cell mediated immunity;GO:0006464//cellular protein modification process;GO:0006259//DNA metabolic…
TCONS_00020216	182.793	2231.91	1.27667	9.46333	2.88997	0.00137786	0.0272695	yes	ANK2	XP_017904694.1 PREDICTED: ankyrin-2 isoform X1 [Capra hircus]	-	-	-	-	GO:0044449//contractile fiber part;GO:0005737//cytoplasm;GO:0005623//cell;GO:0016020//membrane;GO:0044459//plasma membrane part;GO:0005886//plasma membrane;GO:0044425//membrane part;GO:0005622//intracellular;GO:0043229//intracellular organelle;GO:0044464//cell part;GO:0030017//sarcomere;GO:0071944//cell periphery;GO:0044422//organelle part;GO:0005911//cell-cell junction;GO:0044291//cell-cell cont…	GO:0008092//cytoskeletal protein binding;GO:0098772//molecular function regulator;GO:0005488//binding;GO:0019900//kinase binding;GO:0016247//channel regulator activity;GO:0019899//enzyme binding;GO:0005515//protein binding	GO:0044699//single-organism process;GO:0044707//single-multicellular organism process;GO:0086065//cell communication involved in cardiac conduction;GO:0006813//potassium ion transport;GO:0032844//regulation of homeostatic process;GO:0060048//cardiac muscle contraction;GO:0006936//muscle contraction;GO:0044767//single-organism developmental process;GO:0006605//protein targeting;GO:0065009//regulat…
TCONS_00020218	5.63667	508.06	0.04	2.11667	5.72565	9.94711e-05	0.00326659	yes	ANK2	XP_017904694.1 PREDICTED: ankyrin-2 isoform X1 [Capra hircus]	-	-	-	-	GO:0044459//plasma membrane part;GO:0044291//cell-cell contact zone;GO:0043228//non-membrane-bounded organelle;GO:0044422//organelle part;GO:0005911//cell-cell junction;GO:0044444//cytoplasmic part;GO:0005737//cytoplasm;GO:0044464//cell part;GO:0043292//contractile fiber;GO:0016021//integral component of membrane;GO:0031674//I band;GO:0016020//membrane;GO:0043229//intracellular organelle;GO:00300…	GO:0005488//binding;GO:0019900//kinase binding;GO:0098772//molecular function regulator;GO:0016247//channel regulator activity;GO:0019899//enzyme binding;GO:0008092//cytoskeletal protein binding;GO:0005515//protein binding	GO:0003013//circulatory system process;GO:0086001//cardiac muscle cell action potential;GO:0044763//single-organism cellular process;GO:0051641//cellular localization;GO:1990778//protein localization to cell periphery;GO:0072359//circulatory system development;GO:0008015//blood circulation;GO:0032411//positive regulation of transporter activity;GO:0090150//establishment of protein localization to…
TCONS_00020219	0	509.4	0.001	2.02333	10.9825	3.29299e-06	0.00017454	yes	ANK2	XP_017904695.1 PREDICTED: ankyrin-2 isoform X2 [Capra hircus]	-	-	-	-	GO:0043232//intracellular non-membrane-bounded organelle;GO:0043292//contractile fiber;GO:0005623//cell;GO:0016021//integral component of membrane;GO:0044291//cell-cell contact zone;GO:0016020//membrane;GO:0031224//intrinsic component of membrane;GO:0005622//intracellular;GO:0043226//organelle;GO:0005886//plasma membrane;GO:0044444//cytoplasmic part;GO:0044424//intracellular part;GO:0030016//myof…	GO:0008092//cytoskeletal protein binding;GO:0098772//molecular function regulator;GO:0005515//protein binding;GO:0005488//binding;GO:0016247//channel regulator activity;GO:0019900//kinase binding;GO:0019899//enzyme binding	GO:0031647//regulation of protein stability;GO:0044802//single-organism membrane organization;GO:0051050//positive regulation of transport;GO:0048522//positive regulation of cellular process;GO:0044700//single organism signaling;GO:0044707//single-multicellular organism process;GO:0007154//cell communication;GO:0007275//multicellular organism development;GO:0050896//response to stimulus;GO:000320…
TCONS_00020499	1081.89	364.817	9.69	2.24333	-2.11085	0.00129648	0.026134	yes	ARAP2	XP_013820031.2 PREDICTED: arf-GAP with Rho-GAP domain, ANK repeat and PH domain-containing protein 2 isoform X3 [Capra hircus]	Cellular Processes	Transport and catabolism	ko04144//Endocytosis	K18440	GO:0005623//cell;GO:0044464//cell part	GO:0005543//phospholipid binding;GO:0008289//lipid binding;GO:0035091//phosphatidylinositol binding;GO:0005488//binding;GO:1901981//phosphatidylinositol phosphate binding;GO:0046872//metal ion binding;GO:0043169//cation binding;GO:0043167//ion binding;GO:0043168//anion binding;GO:0046914//transition metal ion binding	GO:0050790//regulation of catalytic activity;GO:0043087//regulation of GTPase activity;GO:0065007//biological regulation;GO:0050789//regulation of biological process;GO:0051336//regulation of hydrolase activity;GO:0065009//regulation of molecular function;GO:0019222//regulation of metabolic process
TCONS_00020604	332.193	38.3333	2.85667	0.223333	-3.67706	2.17069e-05	0.00090033	yes	ATP8A1	ELK03632.1 Putative phospholipid-transporting ATPase IA [Pteropus alecto]	-	-	-	-	-	-	-
TCONS_00020655	815.613	23.8933	4.97333	0.103333	-5.58884	1.66759e-08	1.63567e-06	yes	FRYL	XP_012009639.1 PREDICTED: protein furry homolog-like isoform X14 [Ovis aries musimon]	-	-	-	-	-	-	-
TCONS_00020734	322.363	56.0767	4.53333	0.566667	-3	0.000385485	0.00997107	yes	PPAT	XP_017904978.1 PREDICTED: amidophosphoribosyltransferase [Capra hircus]	Metabolism	Nucleotide metabolism;Amino acid metabolism;Global and Overview	ko01100//Metabolic pathways;ko00230//Purine metabolism;ko01110//Biosynthesis of secondary metabolites;ko01130//Biosynthesis of antibiotics;ko00250//Alanine, aspartate and glutamate metabolism	K00764	-	GO:0043169//cation binding;GO:0005488//binding;GO:0003824//catalytic activity;GO:0051540//metal cluster binding;GO:0016740//transferase activity;GO:0043167//ion binding	GO:0018130//heterocycle biosynthetic process;GO:0009156//ribonucleoside monophosphate biosynthetic process;GO:0019693//ribose phosphate metabolic process;GO:0009123//nucleoside monophosphate metabolic process;GO:0008152//metabolic process;GO:0009987//cellular process;GO:0009058//biosynthetic process;GO:1901360//organic cyclic compound metabolic process;GO:0055086//nucleobase-containing small mole…
TCONS_00021015	639.573	75.7867	11.48	0.94	-3.61032	1.42339e-06	8.4926e-05	yes	SEC31A	XP_017905144.1 PREDICTED: protein transport protein Sec31A isoform X2 [Capra hircus]	Genetic Information Processing	Folding, sorting and degradation	ko04141//Protein processing in endoplasmic reticulum	K14005	GO:0031988//membrane-bounded vesicle;GO:0043234//protein complex;GO:0031982//vesicle;GO:0044425//membrane part;GO:0005623//cell;GO:0005622//intracellular;GO:0044444//cytoplasmic part;GO:0044432//endoplasmic reticulum part;GO:0005737//cytoplasm;GO:0044446//intracellular organelle part;GO:0043229//intracellular organelle;GO:0044422//organelle part;GO:0005783//endoplasmic reticulum;GO:0016023//cytop…	GO:0005488//binding;GO:0005515//protein binding	GO:0010035//response to inorganic substance;GO:0050896//response to stimulus;GO:0042221//response to chemical;GO:0010038//response to metal ion
TCONS_00021115	328.053	62.5133	8.07	1.13	-2.83625	0.000626208	0.014655	yes	ZBTB49	XP_014952113.1 PREDICTED: zinc finger and BTB domain-containing protein 49 isoform X2 [Ovis aries]	-	-	-	-	GO:0005623//cell;GO:0043227//membrane-bounded organelle;GO:0005622//intracellular;GO:0043231//intracellular membrane-bounded organelle;GO:0044464//cell part;GO:0043226//organelle;GO:0043229//intracellular organelle;GO:0044424//intracellular part	GO:0043169//cation binding;GO:0005488//binding;GO:0043167//ion binding	-
TCONS_00021164	28.3433	886.18	0.416667	8.54333	4.35783	0.00174457	0.032645	yes	PROM1	XP_017905242.1 PREDICTED: prominin-1 isoform X5 [Capra hircus]	-	-	-	-	GO:0005902//microvillus;GO:0071944//cell periphery;GO:0031982//vesicle;GO:0031090//organelle membrane;GO:0044464//cell part;GO:0042995//cell projection;GO:0031988//membrane-bounded vesicle;GO:0005886//plasma membrane;GO:0098588//bounding membrane of organelle;GO:0005623//cell;GO:0016021//integral component of membrane;GO:0044424//intracellular part;GO:0031224//intrinsic component of membrane;GO:0…	GO:0050839//cell adhesion molecule binding;GO:0005488//binding;GO:0008092//cytoskeletal protein binding;GO:0005515//protein binding	GO:0007275//multicellular organism development;GO:0061326//renal tubule development;GO:0035850//epithelial cell differentiation involved in kidney development;GO:0072311//glomerular epithelial cell differentiation;GO:0048513//animal organ development;GO:0032501//multicellular organismal process;GO:0001655//urogenital system development;GO:0032502//developmental process;GO:0072010//glomerular epit…
TCONS_00021243	476.593	11.4733	14.01	0.29	-5.59426	0.000329812	0.00875101	yes	TACC3	XP_017905295.1 PREDICTED: transforming acidic coiled-coil-containing protein 3 [Capra hircus]	Genetic Information Processing	Translation	ko03013//RNA transport	K14283	GO:0043226//organelle;GO:0044446//intracellular organelle part;GO:0015630//microtubule cytoskeleton;GO:0043229//intracellular organelle;GO:0005622//intracellular;GO:0044424//intracellular part;GO:0044422//organelle part;GO:0005815//microtubule organizing center;GO:0005623//cell;GO:0043232//intracellular non-membrane-bounded organelle;GO:0043228//non-membrane-bounded organelle;GO:0005856//cytoskel…	GO:0005488//binding;GO:0005515//protein binding	GO:1903827//regulation of cellular protein localization;GO:0032879//regulation of localization;GO:0048856//anatomical structure development;GO:0016043//cellular component organization;GO:0007017//microtubule-based process;GO:0046822//regulation of nucleocytoplasmic transport;GO:0009987//cellular process;GO:0051179//localization;GO:1903828//negative regulation of cellular protein localization;GO:0…
TCONS_00021415	1113.53	230.9	13.5333	2.06	-2.7158	2.08035e-05	0.000869327	yes	ERAP1	XP_005683508.2 PREDICTED: endoplasmic reticulum aminopeptidase 1 [Capra hircus]	-	-	-	-	GO:0005576//extracellular region;GO:0005622//intracellular;GO:0005623//cell;GO:0031982//vesicle;GO:0043226//organelle;GO:0043227//membrane-bounded organelle;GO:0031988//membrane-bounded vesicle;GO:0044424//intracellular part;GO:0044421//extracellular region part;GO:0044464//cell part	GO:0008233//peptidase activity;GO:0046914//transition metal ion binding;GO:0043167//ion binding;GO:0005102//receptor binding;GO:0005126//cytokine receptor binding;GO:0070011//peptidase activity, acting on L-amino acid peptides;GO:0046872//metal ion binding;GO:0003824//catalytic activity;GO:0005515//protein binding;GO:0005488//binding;GO:0016787//hydrolase activity;GO:0043169//cation binding;GO:00…	GO:0008152//metabolic process;GO:0051704//multi-organism process;GO:0043207//response to external biotic stimulus;GO:0044238//primary metabolic process;GO:0019538//protein metabolic process;GO:0006508//proteolysis;GO:0043170//macromolecule metabolic process;GO:0065007//biological regulation;GO:0009607//response to biotic stimulus;GO:0022603//regulation of anatomical structure morphogenesis;GO:000…
TCONS_00021463	595.453	23.0267	10.5633	0.273333	-5.27226	9.9626e-10	1.2925e-07	yes	MCTP1	XP_012034352.1 PREDICTED: multiple C2 and transmembrane domain-containing protein 1 isoform X7 [Ovis aries]	-	-	-	-	GO:0016020//membrane;GO:0031224//intrinsic component of membrane;GO:0044425//membrane part	-	-
TCONS_00021570	523.177	9.89667	4.39333	0.0666667	-6.04221	2.12454e-06	0.000118966	yes	ATP10B	XP_017905573.1 PREDICTED: probable phospholipid-transporting ATPase VB isoform X1 [Capra hircus]	-	-	-	-	GO:0043229//intracellular organelle;GO:0043231//intracellular membrane-bounded organelle;GO:0016020//membrane;GO:0044425//membrane part;GO:0005623//cell;GO:0043226//organelle;GO:0031224//intrinsic component of membrane;GO:0044424//intracellular part;GO:0005622//intracellular;GO:0043227//membrane-bounded organelle;GO:0044464//cell part	GO:0001883//purine nucleoside binding;GO:0032549//ribonucleoside binding;GO:0043167//ion binding;GO:0022892//substrate-specific transporter activity;GO:0001882//nucleoside binding;GO:0003824//catalytic activity;GO:0005548//phospholipid transporter activity;GO:1901363//heterocyclic compound binding;GO:0097367//carbohydrate derivative binding;GO:0097159//organic cyclic compound binding;GO:0046872//…	GO:0015914//phospholipid transport;GO:0010876//lipid localization;GO:0006869//lipid transport;GO:0006820//anion transport;GO:0051179//localization;GO:0071702//organic substance transport;GO:0044765//single-organism transport;GO:0044699//single-organism process;GO:0015748//organophosphate ester transport;GO:0006810//transport;GO:0051234//establishment of localization;GO:1902578//single-organism lo…
TCONS_00021588	1732.82	237.77	14.5833	1.55333	-3.23088	4.77778e-06	0.000245089	yes	Ccnjl	XP_017905578.1 PREDICTED: cyclin-J-like protein [Capra hircus]	-	-	-	-	-	-	-
TCONS_00021643	125.737	0	7.07	0.001	-12.7875	3.33598e-05	0.00130483	yes	Havcr1	XP_017907129.1 PREDICTED: hepatitis A virus cellular receptor 1 homolog [Capra hircus]	-	-	-	-	-	-	-
TCONS_00021645	745.297	0	19.3767	0.001	-14.242	1.98156e-09	2.36457e-07	yes	HAVCR1	XP_012026069.1 PREDICTED: hepatitis A virus cellular receptor 1 isoform X3 [Ovis aries musimon]	-	-	-	-	-	-	-
TCONS_00021647	113.603	0	2.85667	0.001	-11.4801	3.1245e-06	0.000166998	yes	Havcr1	XP_017907129.1 PREDICTED: hepatitis A virus cellular receptor 1 homolog [Capra hircus]	-	-	-	-	-	-	-
TCONS_00022391	92.17	1.36333	1.81	0.0233333	-6.27745	0.000616619	0.0144837	yes	SNCAIP	XP_017906165.1 PREDICTED: synphilin-1 isoform X2 [Capra hircus]	-	-	-	-	-	GO:0005488//binding;GO:0005515//protein binding;GO:0044389//ubiquitin-like protein ligase binding;GO:0019899//enzyme binding	GO:0065007//biological regulation;GO:1901360//organic cyclic compound metabolic process;GO:0044087//regulation of cellular component biogenesis;GO:0050804//modulation of synaptic transmission;GO:0006725//cellular aromatic compound metabolic process;GO:0008152//metabolic process;GO:0050789//regulation of biological process;GO:0018958//phenol-containing compound metabolic process;GO:0009712//catech…
TCONS_00022398	793.653	257.98	12.8767	2.83667	-2.18249	0.000615963	0.014476	yes	CSNK1G3	XP_012033605.1 PREDICTED: casein kinase I isoform gamma-3 isoform X8 [Ovis aries]	Environmental Information Processing	Signal transduction	ko04340//Hedgehog signaling pathway	K08958	-	-	-
TCONS_00022425	73.9033	0	1.31667	0.001	-10.3627	0.000156798	0.00472502	yes	Lmnb1	XP_010844649.1 PREDICTED: lamin-B1 [Bison bison bison]	-	-	-	-	GO:0043229//intracellular organelle;GO:0044430//cytoskeletal part;GO:0044422//organelle part;GO:0031975//envelope;GO:0043233//organelle lumen;GO:0031981//nuclear lumen;GO:0044446//intracellular organelle part;GO:0043228//non-membrane-bounded organelle;GO:0005634//nucleus;GO:0044428//nuclear part;GO:0031974//membrane-enclosed lumen;GO:0031090//organelle membrane;GO:0031967//organelle envelope;GO:0…	GO:0019899//enzyme binding;GO:0005515//protein binding;GO:0005488//binding	-
TCONS_00022427	433.26	71.3067	14.0767	1.63667	-3.10447	3.1073e-05	0.00123048	yes	LMNB1	XP_003123930.2 PREDICTED: lamin-B1 [Sus scrofa]	-	-	-	-	GO:0031981//nuclear lumen;GO:0019866//organelle inner membrane;GO:0005882//intermediate filament;GO:0005622//intracellular;GO:0099512//supramolecular fiber;GO:0044446//intracellular organelle part;GO:0031975//envelope;GO:0043228//non-membrane-bounded organelle;GO:0043231//intracellular membrane-bounded organelle;GO:0012505//endomembrane system;GO:0005856//cytoskeleton;GO:0044428//nuclear part;GO:…	GO:0005515//protein binding;GO:0005488//binding;GO:0019899//enzyme binding	-
TCONS_00022442	7.83667	345.767	0.5	13.3267	4.73624	0.000157923	0.0047461	yes	-	XP_017906193.1 PREDICTED: coiled-coil domain-containing protein 192 [Capra hircus]	Genetic Information Processing	Replication and repair	ko03420//Nucleotide excision repair	K10838	GO:0005737//cytoplasm;GO:0044424//intracellular part;GO:0005623//cell;GO:0044464//cell part;GO:0005622//intracellular	GO:0016647//oxidoreductase activity, acting on the CH-NH group of donors, oxygen as acceptor;GO:0016491//oxidoreductase activity;GO:0003824//catalytic activity;GO:0016645//oxidoreductase activity, acting on the CH-NH group of donors	GO:0034641//cellular nitrogen compound metabolic process;GO:0050789//regulation of biological process;GO:0044763//single-organism cellular process;GO:0009308//amine metabolic process;GO:0009310//amine catabolic process;GO:0051179//localization;GO:1901575//organic substance catabolic process;GO:0051234//establishment of localization;GO:1901576//organic substance biosynthetic process;GO:0006598//po…
TCONS_00022443	3.93667	155.043	0.466667	11.0533	4.56595	0.00272701	0.0461874	yes	-	XP_017906193.1 PREDICTED: coiled-coil domain-containing protein 192 [Capra hircus]	-	-	-	-	-	-	-
TCONS_00022478	88.7267	0	2.31	0.001	-11.1737	0.000365152	0.00953561	yes	CDC42SE2	NP_001096007.1 CDC42 small effector protein 2 [Bos taurus]	-	-	-	-	GO:0043232//intracellular non-membrane-bounded organelle;GO:0044424//intracellular part;GO:0043226//organelle;GO:0043229//intracellular organelle;GO:0031988//membrane-bounded vesicle;GO:0043227//membrane-bounded organelle;GO:0031982//vesicle;GO:0044464//cell part;GO:0016020//membrane;GO:0043228//non-membrane-bounded organelle;GO:0005623//cell;GO:0005622//intracellular	GO:0005488//binding	GO:0010646//regulation of cell communication;GO:0022603//regulation of anatomical structure morphogenesis;GO:0050793//regulation of developmental process;GO:0051179//localization;GO:0022604//regulation of cell morphogenesis;GO:0051128//regulation of cellular component organization;GO:0051234//establishment of localization;GO:0065007//biological regulation;GO:0006810//transport;GO:0050789//regulat…
TCONS_00022633	369.32	20.9733	8.47667	0.376667	-4.49214	8.77774e-06	0.000414542	yes	TNFAIP8L1	XP_011994956.1 PREDICTED: tumor necrosis factor alpha-induced protein 8-like protein 1 isoform X1 [Ovis aries musimon]	-	-	-	-	-	-	GO:0048583//regulation of response to stimulus;GO:0009966//regulation of signal transduction;GO:0023051//regulation of signaling;GO:0065007//biological regulation;GO:0050794//regulation of cellular process;GO:0010646//regulation of cell communication;GO:0032006//regulation of TOR signaling;GO:0050789//regulation of biological process;GO:1902531//regulation of intracellular signal transduction
TCONS_00022736	85.3133	0	1.61333	0.001	-10.6558	5.84e-06	0.000291227	yes	Tnfsf14	XP_017907161.1 PREDICTED: tumor necrosis factor ligand superfamily member 14-like [Capra hircus]	Environmental Information Processing	Signal transduction;Signaling molecules and interaction	ko04060//Cytokine-cytokine receptor interaction;ko04064//NF-kappa B signaling pathway	K05477	GO:0031224//intrinsic component of membrane;GO:0016020//membrane;GO:0044425//membrane part;GO:0044421//extracellular region part;GO:0005576//extracellular region	GO:0061135//endopeptidase regulator activity;GO:0004869//cysteine-type endopeptidase inhibitor activity;GO:0004866//endopeptidase inhibitor activity;GO:0098772//molecular function regulator;GO:0061134//peptidase regulator activity;GO:0032813//tumor necrosis factor receptor superfamily binding;GO:0005126//cytokine receptor binding;GO:0005515//protein binding;GO:0030234//enzyme regulator activity;G…	GO:1904591//positive regulation of protein import;GO:0042981//regulation of apoptotic process;GO:1902533//positive regulation of intracellular signal transduction;GO:0051049//regulation of transport;GO:0050793//regulation of developmental process;GO:0009967//positive regulation of signal transduction;GO:0043069//negative regulation of programmed cell death;GO:0050795//regulation of behavior;GO:00…
TCONS_00022790	4673.11	1627.08	93.6933	25.0533	-1.90294	0.00255408	0.0439252	yes	SLC44A2	XP_011991440.1 PREDICTED: choline transporter-like protein 2 isoform X4 [Ovis aries musimon]	-	-	-	-	GO:0031982//vesicle;GO:0043229//intracellular organelle;GO:0031090//organelle membrane;GO:0043227//membrane-bounded organelle;GO:0005773//vacuole;GO:0031224//intrinsic component of membrane;GO:0044424//intracellular part;GO:0044444//cytoplasmic part;GO:0005737//cytoplasm;GO:0044425//membrane part;GO:0016020//membrane;GO:0005623//cell;GO:0005774//vacuolar membrane;GO:0043231//intracellular membran…	-	GO:0051179//localization;GO:0050794//regulation of cellular process;GO:0051234//establishment of localization;GO:0050789//regulation of biological process;GO:0048583//regulation of response to stimulus;GO:0009966//regulation of signal transduction;GO:0043122//regulation of I-kappaB kinase/NF-kappaB signaling;GO:0065007//biological regulation;GO:0023051//regulation of signaling;GO:1902531//regulat…
TCONS_00022865	1805.82	20.45	14.2433	0.136667	-6.70348	1.52184e-10	2.51548e-08	yes	ARHGEF18	XP_011991568.2 PREDICTED: rho guanine nucleotide exchange factor 18 isoform X2 [Ovis aries musimon]	-	-	-	-	-	GO:0005488//binding;GO:0043169//cation binding;GO:0043167//ion binding	GO:0065009//regulation of molecular function;GO:0019222//regulation of metabolic process;GO:0050789//regulation of biological process;GO:0051336//regulation of hydrolase activity;GO:0043087//regulation of GTPase activity;GO:0050790//regulation of catalytic activity;GO:0065007//biological regulation
TCONS_00023141	164.993	6.27333	3.06	0.0933333	-5.035	9.81527e-05	0.00323159	yes	ANKLE1	XP_617670.4 PREDICTED: ankyrin repeat and LEM domain-containing protein 1 isoform X2 [Bos taurus]	-	-	-	-	-	-	-
TCONS_00023440	435.91	2.71667	31.3233	0.153333	-7.67442	4.88041e-10	6.7853e-08	yes	CAMK4	XP_002691060.1 PREDICTED: calcium/calmodulin-dependent protein kinase type IV isoform X2 [Bos taurus]	Organismal Systems;Environmental Information Processing	Signal transduction;Nervous system;Aging;Development;Endocrine system	ko04024//cAMP signaling pathway;ko04020//Calcium signaling pathway;ko04921//Oxytocin signaling pathway;ko04722//Neurotrophin signaling pathway;ko04380//Osteoclast differentiation;ko04725//Cholinergic synapse;ko04211//Longevity regulating pathway - mammal;ko04925//Aldosterone synthesis and secretion;ko04720//Long-term potentiation	K05869	-	-	-
TCONS_00023921	4.58	208.723	0.47	17.0433	5.1804	0.000308157	0.00824388	yes	-	XP_011968688.1 PREDICTED: double-headed protease inhibitor, submandibular gland-like [Ovis aries musimon]	-	-	-	-	-	-	-
TCONS_00024037	99.02	0.67	1.32333	0.00666667	-7.633	1.38794e-05	0.000615732	yes	PCDHB1	XP_005683112.1 PREDICTED: protocadherin beta-1 [Capra hircus]	-	-	-	-	GO:0031224//intrinsic component of membrane;GO:0044425//membrane part;GO:0016020//membrane	-	GO:0007155//cell adhesion;GO:0098609//cell-cell adhesion;GO:0098742//cell-cell adhesion via plasma-membrane adhesion molecules;GO:0022610//biological adhesion
TCONS_00024110	111.777	0	3.69667	0.001	-11.852	1.30314e-06	7.90186e-05	yes	CXXC5	XP_012006035.1 PREDICTED: CXXC-type zinc finger protein 5 isoform X1 [Ovis aries musimon]	-	-	-	-	GO:0043227//membrane-bounded organelle;GO:0043231//intracellular membrane-bounded organelle;GO:0043228//non-membrane-bounded organelle;GO:0043232//intracellular non-membrane-bounded organelle;GO:0043226//organelle;GO:0005623//cell;GO:0005622//intracellular;GO:0043229//intracellular organelle;GO:0044464//cell part;GO:0044424//intracellular part	GO:0043169//cation binding;GO:0003676//nucleic acid binding;GO:1901363//heterocyclic compound binding;GO:0005488//binding;GO:0046872//metal ion binding;GO:0060089//molecular transducer activity;GO:0097159//organic cyclic compound binding;GO:0043167//ion binding;GO:0046914//transition metal ion binding	GO:0065007//biological regulation;GO:0023051//regulation of signaling;GO:1902531//regulation of intracellular signal transduction;GO:0048583//regulation of response to stimulus;GO:0043122//regulation of I-kappaB kinase/NF-kappaB signaling;GO:0050794//regulation of cellular process;GO:0010646//regulation of cell communication;GO:0009966//regulation of signal transduction;GO:0050789//regulation of …
TCONS_00024252	617.173	218.43	5.68333	1.42	-2.00085	0.00172681	0.0324077	yes	Jade2	XP_017905866.1 PREDICTED: protein Jade-2 isoform X1 [Capra hircus]	-	-	-	-	-	-	GO:0008152//metabolic process;GO:0043933//macromolecular complex subunit organization;GO:0071840//cellular component organization or biogenesis;GO:0044710//single-organism metabolic process;GO:1902589//single-organism organelle organization;GO:0006996//organelle organization;GO:0044260//cellular macromolecule metabolic process;GO:0071704//organic substance metabolic process;GO:0009987//cellular p…
TCONS_00024269	5016.75	13.5067	102.47	0.226667	-8.82041	1.77799e-15	1.11761e-12	yes	TCF7	XP_011971424.1 PREDICTED: transcription factor 7 isoform X12 [Ovis aries musimon]	Organismal Systems;Cellular Processes;Environmental Information Processing	Signal transduction;Cellular commiunity;Endocrine system	ko04390//Hippo signaling pathway;ko04310//Wnt signaling pathway;ko04916//Melanogenesis;ko04520//Adherens junction	K02620	-	-	-
TCONS_00024319	207.943	1.63667	8.79	0.0566667	-7.27722	7.37573e-05	0.0025399	yes	DAZAP1	XP_011971526.1 PREDICTED: DAZ-associated protein 1 isoform X4 [Ovis aries musimon]	Genetic Information Processing	Translation	ko03015//mRNA surveillance pathway	K14411	GO:0043231//intracellular membrane-bounded organelle;GO:0031974//membrane-enclosed lumen;GO:0005623//cell;GO:0043229//intracellular organelle;GO:0044428//nuclear part;GO:0070013//intracellular organelle lumen;GO:0031981//nuclear lumen;GO:0005634//nucleus;GO:0043227//membrane-bounded organelle;GO:0044446//intracellular organelle part;GO:0005622//intracellular;GO:0043233//organelle lumen;GO:0044464…	GO:0097159//organic cyclic compound binding;GO:0005488//binding;GO:1901363//heterocyclic compound binding;GO:0003723//RNA binding;GO:0003676//nucleic acid binding	GO:0019219//regulation of nucleobase-containing compound metabolic process;GO:0048522//positive regulation of cellular process;GO:0019953//sexual reproduction;GO:0051704//multi-organism process;GO:0031323//regulation of cellular metabolic process;GO:0080090//regulation of primary metabolic process;GO:0060255//regulation of macromolecule metabolic process;GO:0003006//developmental process involved…
TCONS_00024379	754.04	217.21	52.1933	9.52667	-2.45382	0.0016774	0.0317209	yes	CFD	XP_012033825.1 PREDICTED: complement factor D [Ovis aries]	Organismal Systems	Immune system	ko04610//Complement and coagulation cascades	K01334	GO:0031982//vesicle;GO:0043226//organelle;GO:0005576//extracellular region;GO:0031988//membrane-bounded vesicle;GO:0044421//extracellular region part;GO:0043227//membrane-bounded organelle	GO:0004175//endopeptidase activity;GO:0016787//hydrolase activity;GO:0008233//peptidase activity;GO:0003824//catalytic activity;GO:0070011//peptidase activity, acting on L-amino acid peptides	GO:0044238//primary metabolic process;GO:0008152//metabolic process;GO:0050789//regulation of biological process;GO:0002376//immune system process;GO:0006955//immune response;GO:0065007//biological regulation;GO:0006952//defense response;GO:0044699//single-organism process;GO:0050896//response to stimulus;GO:0006950//response to stress;GO:0002684//positive regulation of immune system process;GO:0…
TCONS_00024383	143.24	0	15.9433	0.001	-13.9607	5.6906e-06	0.000285676	yes	AZU1	XP_004009519.1 PREDICTED: azurocidin [Ovis aries]	-	-	-	-	-	-	-
TCONS_00024645	408.527	43.3767	3.69	0.256667	-3.84565	3.42385e-06	0.000180832	yes	RAPGEF6	XP_005682691.1 PREDICTED: rap guanine nucleotide exchange factor 6 isoform X4 [Capra hircus]	Environmental Information Processing	Signal transduction	ko04015//Rap1 signaling pathway	K08020	GO:0005623//cell;GO:0044464//cell part	-	GO:0050789//regulation of biological process;GO:0065009//regulation of molecular function;GO:0043087//regulation of GTPase activity;GO:0065007//biological regulation;GO:0050790//regulation of catalytic activity;GO:0051336//regulation of hydrolase activity;GO:0019222//regulation of metabolic process
TCONS_00024658	82.14	0	1.06	0.001	-10.0498	8.66294e-06	0.000410423	yes	ACSL6	XP_017906214.1 PREDICTED: long-chain-fatty-acid--CoA ligase 6 isoform X2 [Capra hircus]	Organismal Systems;Metabolism;Cellular Processes	Global and Overview;Lipid metabolism;Endocrine system;Transport and catabolism	ko01100//Metabolic pathways;ko03320//PPAR signaling pathway;ko04146//Peroxisome;ko04920//Adipocytokine signaling pathway;ko01212//Fatty acid metabolism;ko00071//Fatty acid degradation;ko00061//Fatty acid biosynthesis	K01897	GO:0005623//cell;GO:0043227//membrane-bounded organelle;GO:0044424//intracellular part;GO:0043226//organelle;GO:0043231//intracellular membrane-bounded organelle;GO:0043229//intracellular organelle;GO:0044464//cell part;GO:0005622//intracellular	GO:0005488//binding;GO:0005515//protein binding;GO:0016877//ligase activity, forming carbon-sulfur bonds;GO:0015645//fatty acid ligase activity;GO:0046983//protein dimerization activity;GO:0016874//ligase activity;GO:0003824//catalytic activity	GO:0061351//neural precursor cell proliferation;GO:0008283//cell proliferation;GO:0044699//single-organism process
TCONS_00024727	1320.32	424.557	12.1733	3.03	-2.00633	0.00211662	0.0381667	yes	DOT1L	XP_017906246.1 PREDICTED: histone-lysine N-methyltransferase, H3 lysine-79 specific isoform X2 [Capra hircus]	Metabolism	Amino acid metabolism	ko00310//Lysine degradation	K11427	GO:0043229//intracellular organelle;GO:0005623//cell;GO:0043227//membrane-bounded organelle;GO:0044424//intracellular part;GO:0043226//organelle;GO:0005622//intracellular;GO:0043231//intracellular membrane-bounded organelle;GO:0044464//cell part	GO:0005488//binding;GO:0008276//protein methyltransferase activity;GO:0008757//S-adenosylmethionine-dependent methyltransferase activity;GO:0016741//transferase activity, transferring one-carbon groups;GO:0008168//methyltransferase activity;GO:0042054//histone methyltransferase activity;GO:0003824//catalytic activity;GO:0005515//protein binding;GO:0008170//N-methyltransferase activity;GO:0018024/…	GO:0006996//organelle organization;GO:0071704//organic substance metabolic process;GO:0016568//chromatin modification;GO:0019538//protein metabolic process;GO:0010605//negative regulation of macromolecule metabolic process;GO:0071840//cellular component organization or biogenesis;GO:0018205//peptidyl-lysine modification;GO:0010629//negative regulation of gene expression;GO:0043170//macromolecule …
TCONS_00024806	0	103.43	0.001	0.823333	9.68533	0.00119679	0.0245231	yes	ZBTB7A	XP_006042593.1 PREDICTED: LOW QUALITY PROTEIN: zinc finger and BTB domain-containing protein 7A [Bubalus bubalis]	-	-	-	-	GO:0005622//intracellular;GO:0043231//intracellular membrane-bounded organelle;GO:0043227//membrane-bounded organelle;GO:0005623//cell;GO:0043229//intracellular organelle;GO:0043226//organelle;GO:0044424//intracellular part;GO:0044464//cell part	GO:1901363//heterocyclic compound binding;GO:0003676//nucleic acid binding;GO:0043167//ion binding;GO:0019899//enzyme binding;GO:0005515//protein binding;GO:0097159//organic cyclic compound binding;GO:0005488//binding;GO:0043169//cation binding	GO:0060255//regulation of macromolecule metabolic process;GO:0009889//regulation of biosynthetic process;GO:2000112//regulation of cellular macromolecule biosynthetic process;GO:0051252//regulation of RNA metabolic process;GO:0009987//cellular process;GO:1903506//regulation of nucleic acid-templated transcription;GO:0019222//regulation of metabolic process;GO:0010556//regulation of macromolecule …
TCONS_00024994	586.413	102.823	9.23	1.13	-3.03001	9.89612e-06	0.000457672	yes	ZNF557	XP_014334088.1 PREDICTED: zinc finger protein 333-like [Bos mutus]	-	-	-	-	-	-	-
TCONS_00025005	234.243	0	2.91333	0.001	-11.5085	1.23612e-05	0.000556824	yes	COL5A3	XP_017906498.1 PREDICTED: collagen alpha-3(V) chain isoform X1 [Capra hircus]	Organismal Systems	Digestive system	ko04974//Protein digestion and absorption	K19721	GO:0032991//macromolecular complex;GO:0031012//extracellular matrix;GO:0031982//vesicle;GO:0043226//organelle;GO:0044420//extracellular matrix component;GO:0044421//extracellular region part;GO:0098644//complex of collagen trimers;GO:0005581//collagen trimer;GO:0098643//banded collagen fibril;GO:0043234//protein complex;GO:0005583//fibrillar collagen trimer;GO:0005576//extracellular region;GO:000…	GO:0005539//glycosaminoglycan binding;GO:0097367//carbohydrate derivative binding;GO:0005488//binding	GO:0022610//biological adhesion;GO:0031589//cell-substrate adhesion;GO:0007155//cell adhesion
TCONS_00025177	0	308.293	0.001	2.76	11.4305	2.00698e-09	2.38852e-07	yes	NFIX	XP_008577535.1 PREDICTED: nuclear factor 1 X-type isoform X4 [Galeopterus variegatus]	-	-	-	-	-	-	-
TCONS_00025217	0	140.35	0.001	0.31	8.27612	7.08011e-06	0.000342338	yes	MUC16	XP_017906772.1 PREDICTED: mucin-16 isoform X1 [Capra hircus]	-	-	-	-	-	-	-
TCONS_00025399	663.833	76.6767	12.4433	1.09	-3.51297	1.73642e-05	0.00074514	yes	JAK3	XP_017906892.1 PREDICTED: tyrosine-protein kinase JAK3 [Capra hircus]	Organismal Systems;Cellular Processes;Environmental Information Processing	Signal transduction;Cellular commiunity;Immune system	ko04151//PI3K-Akt signaling pathway;ko04062//Chemokine signaling pathway;ko04630//Jak-STAT signaling pathway;ko04550//Signaling pathways regulating pluripotency of stem cells	K11218	-	-	-
TCONS_00025451	765.337	201.997	8.73667	1.61667	-2.43406	0.00016608	0.00493473	yes	SUGP2	XP_017906957.1 PREDICTED: SURP and G-patch domain-containing protein 2 isoform X2 [Capra hircus]	-	-	-	-	-	GO:0003723//RNA binding;GO:0005488//binding;GO:0097159//organic cyclic compound binding;GO:0003676//nucleic acid binding;GO:1901363//heterocyclic compound binding	GO:0010467//gene expression;GO:0008152//metabolic process;GO:0071704//organic substance metabolic process;GO:0043170//macromolecule metabolic process
TCONS_00025484	252.673	7.64667	3.72	0.0966667	-5.26614	0.000368259	0.00959991	yes	LPAR2	XP_014951047.1 PREDICTED: lysophosphatidic acid receptor 2 isoform X1 [Ovis aries]	Environmental Information Processing	Signaling molecules and interaction;Signal transduction	ko04151//PI3K-Akt signaling pathway;ko04080//Neuroactive ligand-receptor interaction;ko04015//Rap1 signaling pathway;ko04072//Phospholipase D signaling pathway	K04291	GO:0031988//membrane-bounded vesicle;GO:0044425//membrane part;GO:0005737//cytoplasm;GO:0016023//cytoplasmic, membrane-bounded vesicle;GO:0031410//cytoplasmic vesicle;GO:0031224//intrinsic component of membrane;GO:0044444//cytoplasmic part;GO:0005623//cell;GO:0005622//intracellular;GO:0044464//cell part;GO:0016020//membrane;GO:0043229//intracellular organelle;GO:0044424//intracellular part;GO:003…	GO:0038023//signaling receptor activity;GO:0004930//G-protein coupled receptor activity;GO:0004888//transmembrane signaling receptor activity;GO:0005488//binding;GO:0099600//transmembrane receptor activity;GO:0045125//bioactive lipid receptor activity;GO:0019904//protein domain specific binding;GO:0060089//molecular transducer activity;GO:0004871//signal transducer activity;GO:0005515//protein bi…	GO:0007166//cell surface receptor signaling pathway;GO:0019222//regulation of metabolic process;GO:0010562//positive regulation of phosphorus metabolic process;GO:0007154//cell communication;GO:0050896//response to stimulus;GO:0042325//regulation of phosphorylation;GO:0010646//regulation of cell communication;GO:0065007//biological regulation;GO:0031325//positive regulation of cellular metabolic …
TCONS_00025899	17.25	631.563	0.106667	3.21333	4.91289	3.96105e-05	0.00151092	yes	PTPRD	XP_017907475.1 PREDICTED: receptor-type tyrosine-protein phosphatase delta isoform X16 [Capra hircus]	-	-	-	-	GO:0031982//vesicle;GO:0031988//membrane-bounded vesicle;GO:0043227//membrane-bounded organelle;GO:0043226//organelle	GO:0016787//hydrolase activity;GO:0004721//phosphoprotein phosphatase activity;GO:0016788//hydrolase activity, acting on ester bonds;GO:0042578//phosphoric ester hydrolase activity;GO:0016791//phosphatase activity;GO:0003824//catalytic activity	GO:0044238//primary metabolic process;GO:0044267//cellular protein metabolic process;GO:0043170//macromolecule metabolic process;GO:0009987//cellular process;GO:0043412//macromolecule modification;GO:0019538//protein metabolic process;GO:0036211//protein modification process;GO:0044237//cellular metabolic process;GO:0016311//dephosphorylation;GO:0008152//metabolic process;GO:0006470//protein deph…
TCONS_00026144	234.833	37.09	4.22333	0.48	-3.13728	0.000504796	0.012358	yes	Tle4	XP_010806227.1 PREDICTED: transducin-like enhancer protein 4 isoform X2 [Bos taurus]	-	-	-	-	GO:0005622//intracellular;GO:0043227//membrane-bounded organelle;GO:0044424//intracellular part;GO:0005623//cell;GO:0043229//intracellular organelle;GO:0044464//cell part;GO:0043226//organelle;GO:0043231//intracellular membrane-bounded organelle	GO:0000989//transcription factor activity, transcription factor binding;GO:0005488//binding;GO:0008134//transcription factor binding;GO:0000981//RNA polymerase II transcription factor activity, sequence-specific DNA binding;GO:0003700//transcription factor activity, sequence-specific DNA binding;GO:0000988//transcription factor activity, protein binding;GO:0003712//transcription cofactor activity…	GO:2001141//regulation of RNA biosynthetic process;GO:0023052//signaling;GO:0051716//cellular response to stimulus;GO:0031326//regulation of cellular biosynthetic process;GO:0006355//regulation of transcription, DNA-templated;GO:0007165//signal transduction;GO:0007166//cell surface receptor signaling pathway;GO:0019222//regulation of metabolic process;GO:0019219//regulation of nucleobase-containi…
TCONS_00026216	483.72	93.82	7.72333	1.15	-2.74759	0.000406167	0.0103879	yes	NPR2	XP_012003195.1 PREDICTED: atrial natriuretic peptide receptor 2 isoform X1 [Ovis aries musimon]	Organismal Systems;Metabolism;Environmental Information Processing	Endocrine system;Circulatory system;Nucleotide metabolism;Signal transduction	ko00230//Purine metabolism;ko04921//Oxytocin signaling pathway;ko04022//cGMP - PKG signaling pathway;ko04270//Vascular smooth muscle contraction	K12324	GO:0016020//membrane;GO:0031224//intrinsic component of membrane;GO:0044425//membrane part	GO:0097159//organic cyclic compound binding;GO:0032550//purine ribonucleoside binding;GO:0032549//ribonucleoside binding;GO:1901363//heterocyclic compound binding;GO:0001882//nucleoside binding;GO:0016772//transferase activity, transferring phosphorus-containing groups;GO:0005488//binding;GO:0016829//lyase activity;GO:0097367//carbohydrate derivative binding;GO:0004872//receptor activity;GO:00163…	GO:0044260//cellular macromolecule metabolic process;GO:0010721//negative regulation of cell development;GO:0045595//regulation of cell differentiation;GO:0044763//single-organism cellular process;GO:0050794//regulation of cellular process;GO:0007275//multicellular organism development;GO:0006164//purine nucleotide biosynthetic process;GO:0048519//negative regulation of biological process;GO:0043…
TCONS_00026624	336.273	5.31	5.93667	0.0766667	-6.27491	0.000156557	0.00472413	yes	FGD3	XP_011988905.1 PREDICTED: FYVE, RhoGEF and PH domain-containing protein 3 isoform X3 [Ovis aries musimon]	Cellular Processes	Cell motility	ko04810//Regulation of actin cytoskeleton	K05722	-	GO:0043169//cation binding;GO:0043167//ion binding;GO:0005488//binding	GO:0050790//regulation of catalytic activity;GO:0043087//regulation of GTPase activity;GO:0051336//regulation of hydrolase activity;GO:0050789//regulation of biological process;GO:0065009//regulation of molecular function;GO:0065007//biological regulation;GO:0019222//regulation of metabolic process
TCONS_00026628	144.707	7.58333	9.47	0.356667	-4.73072	0.000633185	0.0147641	yes	SUSD3	DAA26572.1 TPA: sushi domain containing 3-like [Bos taurus]	-	-	-	-	-	-	-
TCONS_00027194	85.2567	1172.18	1.75667	16.0867	3.19495	2.68574e-06	0.00014564	yes	FOCAD	XP_017907398.1 PREDICTED: focadhesin isoform X1 [Capra hircus]	-	-	-	-	-	-	-
TCONS_00027563	271.623	10.8233	2.35333	0.06	-5.2936	7.31578e-06	0.000351828	yes	PAX5	XP_012003150.1 PREDICTED: paired box protein Pax-5 isoform X4 [Ovis aries musimon]	-	-	-	-	GO:0043229//intracellular organelle;GO:0043227//membrane-bounded organelle;GO:0043234//protein complex;GO:0044464//cell part;GO:0043231//intracellular membrane-bounded organelle;GO:0005622//intracellular;GO:0032991//macromolecular complex;GO:0044424//intracellular part;GO:0043226//organelle;GO:0005623//cell	GO:0000981//RNA polymerase II transcription factor activity, sequence-specific DNA binding;GO:0097159//organic cyclic compound binding;GO:0044212//transcription regulatory region DNA binding;GO:0001067//regulatory region nucleic acid binding;GO:1901363//heterocyclic compound binding;GO:0000982//transcription factor activity, RNA polymerase II core promoter proximal region sequence-specific bindin…	GO:0050794//regulation of cellular process;GO:0060538//skeletal muscle organ development;GO:2001141//regulation of RNA biosynthetic process;GO:0007517//muscle organ development;GO:0048731//system development;GO:0080090//regulation of primary metabolic process;GO:0009889//regulation of biosynthetic process;GO:0006355//regulation of transcription, DNA-templated;GO:0031399//regulation of protein mod…
TCONS_00027919	0.00333333	142.433	0.001	1.06333	10.0544	4.60769e-06	0.000236908	yes	PTCH1	XP_017907959.1 PREDICTED: protein patched homolog 1 isoform X2 [Capra hircus]	Environmental Information Processing	Signal transduction	ko04024//cAMP signaling pathway;ko04340//Hedgehog signaling pathway	K06225	GO:0044425//membrane part;GO:0031224//intrinsic component of membrane;GO:0016020//membrane	GO:0038023//signaling receptor activity;GO:0004888//transmembrane signaling receptor activity;GO:0099600//transmembrane receptor activity;GO:0004872//receptor activity;GO:0060089//molecular transducer activity;GO:0004871//signal transducer activity	-
TCONS_00027995	2177.49	191.083	31.53	2.07667	-3.92438	1.28266e-08	1.28062e-06	yes	SYK	ELR62626.1 Tyrosine-protein kinase SYK, partial [Bos mutus]	Organismal Systems;Environmental Information Processing	Development;Immune system;Signal transduction	ko04151//PI3K-Akt signaling pathway;ko04650//Natural killer cell mediated cytotoxicity;ko04072//Phospholipase D signaling pathway;ko04611//Platelet activation;ko04380//Osteoclast differentiation;ko04064//NF-kappa B signaling pathway;ko04666//Fc gamma R-mediated phagocytosis;ko04662//B cell receptor signaling pathway;ko04664//Fc epsilon RI signaling pathway	K05855	-	-	-
TCONS_00028244	1494.69	112.03	15.8033	0.936667	-4.07655	5.69803e-06	0.000285727	yes	TNC	XP_017908171.1 PREDICTED: tenascin isoform X4 [Capra hircus]	Environmental Information Processing;Cellular Processes	Signal transduction;Signaling molecules and interaction;Cellular commiunity	ko04151//PI3K-Akt signaling pathway;ko04510//Focal adhesion;ko04512//ECM-receptor interaction	K06252	GO:0044421//extracellular region part;GO:0005912//adherens junction;GO:0030054//cell junction;GO:0005576//extracellular region;GO:0031012//extracellular matrix;GO:0005924//cell-substrate adherens junction;GO:0005578//proteinaceous extracellular matrix;GO:0070161//anchoring junction;GO:0030055//cell-substrate junction;GO:0044420//extracellular matrix component	GO:0005488//binding;GO:0005515//protein binding	GO:0001503//ossification;GO:0001763//morphogenesis of a branching structure;GO:0016043//cellular component organization;GO:0031102//neuron projection regeneration;GO:0048699//generation of neurons;GO:0048589//developmental growth;GO:0022008//neurogenesis;GO:0031175//neuron projection development;GO:0048732//gland development;GO:0044763//single-organism cellular process;GO:0042476//odontogenesis;G…
TCONS_00028350	32.5	0	0.43	0.001	-8.74819	0.00122613	0.0250019	yes	-	ELR55573.1 hypothetical protein M91_15722 [Bos mutus]	-	-	-	-	-	-	-
TCONS_00028387	311.16	0	3.61333	0.001	-11.8191	4.36208e-06	0.00022558	yes	MYO6	XP_017908373.1 PREDICTED: unconventional myosin-VI isoform X3 [Capra hircus]	-	-	-	-	GO:0044446//intracellular organelle part;GO:0005623//cell;GO:0044444//cytoplasmic part;GO:0015629//actin cytoskeleton;GO:0043228//non-membrane-bounded organelle;GO:0031252//cell leading edge;GO:0044464//cell part;GO:0043231//intracellular membrane-bounded organelle;GO:0043005//neuron projection;GO:0031974//membrane-enclosed lumen;GO:0044422//organelle part;GO:0044297//cell body;GO:0044424//intrac…	GO:0001883//purine nucleoside binding;GO:0003824//catalytic activity;GO:0032549//ribonucleoside binding;GO:0097367//carbohydrate derivative binding;GO:0036094//small molecule binding;GO:0017111//nucleoside-triphosphatase activity;GO:0016817//hydrolase activity, acting on acid anhydrides;GO:0001882//nucleoside binding;GO:1901363//heterocyclic compound binding;GO:0097159//organic cyclic compound bi…	GO:0035315//hair cell differentiation;GO:0046942//carboxylic acid transport;GO:0048513//animal organ development;GO:0010468//regulation of gene expression;GO:0048869//cellular developmental process;GO:0030182//neuron differentiation;GO:0044763//single-organism cellular process;GO:0019222//regulation of metabolic process;GO:0051602//response to electrical stimulus;GO:0065007//biological regulation…
TCONS_00028402	39.4033	0	0.583333	0.001	-9.18818	0.000963594	0.0206851	yes	TTK	XP_017908395.1 PREDICTED: dual specificity protein kinase TTK isoform X3 [Capra hircus]	Cellular Processes	Cell growth and death	ko04110//Cell cycle	K08866	-	GO:0036094//small molecule binding;GO:0003824//catalytic activity;GO:0097367//carbohydrate derivative binding;GO:0016740//transferase activity;GO:0032550//purine ribonucleoside binding;GO:0001882//nucleoside binding;GO:0005488//binding;GO:0016773//phosphotransferase activity, alcohol group as acceptor;GO:0016301//kinase activity;GO:0097159//organic cyclic compound binding;GO:0032549//ribonucleosi…	GO:0044699//single-organism process;GO:0006464//cellular protein modification process;GO:0019538//protein metabolic process;GO:0071704//organic substance metabolic process;GO:0044238//primary metabolic process;GO:0044267//cellular protein metabolic process;GO:0044763//single-organism cellular process;GO:0009987//cellular process;GO:0043170//macromolecule metabolic process;GO:0044237//cellular met…
TCONS_00028434	136.723	0.00666667	1.17667	0.001	-10.2005	0.000115128	0.0036991	yes	DOPEY1	XP_017908411.1 PREDICTED: protein dopey-1 isoform X3 [Capra hircus]	-	-	-	-	-	-	-
TCONS_00028586	368.523	10.19	6.96333	0.146667	-5.56917	7.28987e-08	6.00257e-06	yes	FYN	XP_012971238.1 PREDICTED: tyrosine-protein kinase Fyn isoform X1 [Mesocricetus auratus]	Organismal Systems;Environmental Information Processing;Cellular Processes	Development;Cellular commiunity;Immune system;Signal transduction;Nervous system	ko04510//Focal adhesion;ko04650//Natural killer cell mediated cytotoxicity;ko04072//Phospholipase D signaling pathway;ko04360//Axon guidance;ko04611//Platelet activation;ko04380//Osteoclast differentiation;ko04660//T cell receptor signaling pathway;ko04071//Sphingolipid signaling pathway;ko04725//Cholinergic synapse;ko04520//Adherens junction;ko04664//Fc epsilon RI signaling pathway	K05703	-	-	-
TCONS_00028717	242.943	6.96	3.99667	0.0766667	-5.70405	9.89416e-07	6.21924e-05	yes	BVES	XP_004011290.1 PREDICTED: blood vessel epicardial substance isoform X1 [Ovis aries]	-	-	-	-	GO:0005886//plasma membrane;GO:0044464//cell part;GO:0005623//cell;GO:0031224//intrinsic component of membrane;GO:0044459//plasma membrane part;GO:0016020//membrane;GO:0043296//apical junction complex;GO:0030054//cell junction;GO:0044425//membrane part;GO:0071944//cell periphery;GO:0005911//cell-cell junction	GO:0030551//cyclic nucleotide binding;GO:1901265//nucleoside phosphate binding;GO:1901363//heterocyclic compound binding;GO:0097159//organic cyclic compound binding;GO:0005488//binding;GO:0036094//small molecule binding;GO:0000166//nucleotide binding	GO:0098602//single organism cell adhesion;GO:0042692//muscle cell differentiation;GO:0051234//establishment of localization;GO:0048738//cardiac muscle tissue development;GO:0048468//cell development;GO:0000904//cell morphogenesis involved in differentiation;GO:0035051//cardiocyte differentiation;GO:1903522//regulation of blood circulation;GO:0055001//muscle cell development;GO:0051239//regulation…
TCONS_00028744	0	197.433	0.001	0.99	9.95128	0.000103724	0.0033844	yes	FAXC	XP_011996334.1 PREDICTED: failed axon connections homolog isoform X2 [Ovis aries musimon]	-	-	-	-	-	-	-
TCONS_00028892	719.33	5.47667	15.2067	0.0866667	-7.45501	3.08496e-12	7.91256e-10	yes	MYB	XP_017908724.1 PREDICTED: transcriptional activator Myb isoform X4 [Capra hircus]	Environmental Information Processing	Signal transduction	ko04151//PI3K-Akt signaling pathway	K09420	GO:0044464//cell part;GO:0043227//membrane-bounded organelle;GO:0043226//organelle;GO:0044424//intracellular part;GO:0043229//intracellular organelle;GO:0044444//cytoplasmic part;GO:0005737//cytoplasm;GO:0005622//intracellular;GO:0005623//cell;GO:0043231//intracellular membrane-bounded organelle	GO:0000981//RNA polymerase II transcription factor activity, sequence-specific DNA binding;GO:0005488//binding;GO:0097159//organic cyclic compound binding;GO:1901363//heterocyclic compound binding;GO:0003700//transcription factor activity, sequence-specific DNA binding;GO:0001071//nucleic acid binding transcription factor activity;GO:0003676//nucleic acid binding;GO:0000982//transcription factor …	GO:0031399//regulation of protein modification process;GO:0051252//regulation of RNA metabolic process;GO:0002521//leukocyte differentiation;GO:0048513//animal organ development;GO:1902275//regulation of chromatin organization;GO:0019219//regulation of nucleobase-containing compound metabolic process;GO:0048869//cellular developmental process;GO:0050789//regulation of biological process;GO:007083…
TCONS_00028925	230.913	30.9767	22.7167	2.06	-3.46303	0.000196153	0.00566977	yes	ABRACL	XP_008689265.1 PREDICTED: costars family protein ABRACL [Ursus maritimus]	-	-	-	-	-	-	-
TCONS_00029479	1809.19	7.27	62.4367	0.19	-8.36025	1.74389e-08	1.69406e-06	yes	UBE3D	XP_017908415.1 PREDICTED: E3 ubiquitin-protein ligase E3D isoform X1 [Capra hircus]	-	-	-	-	-	GO:0003824//catalytic activity	GO:0009987//cellular process;GO:0043412//macromolecule modification;GO:0070647//protein modification by small protein conjugation or removal;GO:0044237//cellular metabolic process;GO:0032446//protein modification by small protein conjugation;GO:0008152//metabolic process;GO:0043170//macromolecule metabolic process;GO:0071704//organic substance metabolic process;GO:0044238//primary metabolic proce…
TCONS_00029613	48.67	0	1.06333	0.001	-10.0544	0.000326571	0.00867531	yes	DSE	XP_017908526.1 PREDICTED: dermatan-sulfate epimerase isoform X1 [Capra hircus]	Metabolism	Glycan biosynthesis and metabolism;Global and Overview	ko01100//Metabolic pathways;ko00532//Glycosaminoglycan biosynthesis - chondroitin sulfate / dermatan sulfate	K01794	GO:0043226//organelle;GO:0044425//membrane part;GO:0005622//intracellular;GO:0031224//intrinsic component of membrane;GO:0016020//membrane;GO:0005623//cell;GO:0044424//intracellular part;GO:0043231//intracellular membrane-bounded organelle;GO:0043229//intracellular organelle;GO:0044464//cell part;GO:0043227//membrane-bounded organelle	GO:0016857//racemase and epimerase activity, acting on carbohydrates and derivatives;GO:0003824//catalytic activity;GO:0016854//racemase and epimerase activity;GO:0016853//isomerase activity	GO:1901135//carbohydrate derivative metabolic process;GO:0009101//glycoprotein biosynthetic process;GO:0009100//glycoprotein metabolic process;GO:0044260//cellular macromolecule metabolic process;GO:0008152//metabolic process;GO:0006022//aminoglycan metabolic process;GO:0043170//macromolecule metabolic process;GO:0009987//cellular process;GO:0034645//cellular macromolecule biosynthetic process;GO…
TCONS_00029852	1102.56	2.40667	44.4733	0.0833333	-9.05983	1.9685e-12	5.32437e-10	yes	THEMIS	XP_006058911.1 PREDICTED: protein THEMIS isoform X5 [Bubalus bubalis]	-	-	-	-	GO:0044464//cell part;GO:0043229//intracellular organelle;GO:0043227//membrane-bounded organelle;GO:0005622//intracellular;GO:0032991//macromolecular complex;GO:0030054//cell junction;GO:0043226//organelle;GO:0043231//intracellular membrane-bounded organelle;GO:0005623//cell;GO:0044424//intracellular part;GO:0043234//protein complex	-	GO:0044763//single-organism cellular process;GO:0007155//cell adhesion;GO:0023052//signaling;GO:0030097//hemopoiesis;GO:0002684//positive regulation of immune system process;GO:0048584//positive regulation of response to stimulus;GO:0002764//immune response-regulating signaling pathway;GO:0022610//biological adhesion;GO:0098609//cell-cell adhesion;GO:0044699//single-organism process;GO:0002768//i…
TCONS_00029853	753.15	3.33667	26.49	0.0866667	-8.25575	5.5426e-15	3.01659e-12	yes	THEMIS	XP_005684781.2 PREDICTED: protein THEMIS [Capra hircus]	-	-	-	-	GO:0043234//protein complex;GO:0032991//macromolecular complex;GO:0043227//membrane-bounded organelle;GO:0005622//intracellular;GO:0043226//organelle;GO:0005623//cell;GO:0044424//intracellular part;GO:0044464//cell part;GO:0043229//intracellular organelle;GO:0043231//intracellular membrane-bounded organelle;GO:0030054//cell junction	-	GO:0051716//cellular response to stimulus;GO:0007165//signal transduction;GO:0042110//T cell activation;GO:0045058//T cell selection;GO:0002376//immune system process;GO:0007159//leukocyte cell-cell adhesion;GO:0007275//multicellular organism development;GO:0070489//T cell aggregation;GO:0048584//positive regulation of response to stimulus;GO:0071593//lymphocyte aggregation;GO:0007154//cell commu…
TCONS_00029894	49.85	0	0.74	0.001	-9.53138	0.00018511	0.0054208	yes	MED23	XP_017908713.1 PREDICTED: mediator of RNA polymerase II transcription subunit 23 isoform X3 [Capra hircus]	-	-	-	-	GO:0032991//macromolecular complex;GO:0043234//protein complex	-	GO:0019222//regulation of metabolic process;GO:0050789//regulation of biological process;GO:0010468//regulation of gene expression;GO:0065007//biological regulation;GO:0060255//regulation of macromolecule metabolic process
TCONS_00030111	232.183	10.9933	2.19667	0.0733333	-4.9047	0.000115004	0.00369778	yes	ULBP3	XP_014960633.1 PREDICTED: LOW QUALITY PROTEIN: NKG2D ligand 1-like isoform X1 [Ovis aries]	Organismal Systems	Immune system	ko04650//Natural killer cell mediated cytotoxicity	K07986	-	-	-
TCONS_00030147	179.597	0	0.553333	0.001	-9.11201	8.0005e-05	0.00271731	yes	SYNE1	XP_017908864.1 PREDICTED: nesprin-1 isoform X6 [Capra hircus]	-	-	-	-	GO:0043228//non-membrane-bounded organelle;GO:0005623//cell;GO:0031967//organelle envelope;GO:0098805//whole membrane;GO:0031224//intrinsic component of membrane;GO:0044456//synapse part;GO:0044459//plasma membrane part;GO:0005622//intracellular;GO:0005886//plasma membrane;GO:0097060//synaptic membrane;GO:0044464//cell part;GO:0043232//intracellular non-membrane-bounded organelle;GO:0044446//intr…	GO:0003723//RNA binding;GO:1901363//heterocyclic compound binding;GO:0008092//cytoskeletal protein binding;GO:0003676//nucleic acid binding;GO:0005488//binding;GO:0005515//protein binding;GO:0003779//actin binding;GO:0097159//organic cyclic compound binding;GO:0046983//protein dimerization activity	GO:0016043//cellular component organization;GO:0044763//single-organism cellular process;GO:0044767//single-organism developmental process;GO:0007010//cytoskeleton organization;GO:0044699//single-organism process;GO:0009987//cellular process;GO:0051640//organelle localization;GO:0048869//cellular developmental process;GO:0006997//nucleus organization;GO:0030154//cell differentiation;GO:0051647//n…
TCONS_00030150	994.163	23.9067	2.94333	0.0466667	-5.97891	0.000471396	0.011675	yes	SYNE1	XP_017908867.1 PREDICTED: nesprin-1 isoform X9 [Capra hircus]	-	-	-	-	GO:0043226//organelle;GO:0005622//intracellular;GO:0031975//envelope;GO:0098805//whole membrane;GO:0071944//cell periphery;GO:0031967//organelle envelope;GO:0045202//synapse;GO:0043231//intracellular membrane-bounded organelle;GO:0044422//organelle part;GO:0044428//nuclear part;GO:0005737//cytoplasm;GO:0043232//intracellular non-membrane-bounded organelle;GO:0097060//synaptic membrane;GO:0043228/…	GO:0046983//protein dimerization activity;GO:0003676//nucleic acid binding;GO:0005488//binding;GO:0008092//cytoskeletal protein binding;GO:0005515//protein binding;GO:0097159//organic cyclic compound binding;GO:0003779//actin binding;GO:0003723//RNA binding;GO:1901363//heterocyclic compound binding	GO:0043578//nuclear matrix organization;GO:0051641//cellular localization;GO:0044699//single-organism process;GO:0051647//nucleus localization;GO:0051640//organelle localization;GO:0051179//localization;GO:0006997//nucleus organization;GO:0044763//single-organism cellular process;GO:0016043//cellular component organization;GO:0044767//single-organism developmental process;GO:0006996//organelle or…
TCONS_00030183	278.273	0	2.69667	0.001	-11.397	1.65583e-11	3.53579e-09	yes	IPCEF1	XP_017909009.1 PREDICTED: interactor protein for cytohesin exchange factors 1 [Capra hircus]	-	-	-	-	-	-	GO:0010646//regulation of cell communication;GO:0050789//regulation of biological process;GO:0065007//biological regulation;GO:0050794//regulation of cellular process
TCONS_00030490	388.733	2256	7.57	30.0067	1.98692	0.00165637	0.0314027	yes	SEL1L	XP_017909380.1 PREDICTED: protein sel-1 homolog 1 [Capra hircus]	Genetic Information Processing	Folding, sorting and degradation	ko04141//Protein processing in endoplasmic reticulum	K14026	-	-	-
TCONS_00030505	32.84	0	0.47	0.001	-8.87652	0.00189525	0.0350095	yes	CEP128	XP_017909386.1 PREDICTED: centrosomal protein of 128 kDa [Capra hircus]	-	-	-	-	GO:0043228//non-membrane-bounded organelle;GO:0005622//intracellular;GO:0043226//organelle;GO:0005856//cytoskeleton;GO:0043232//intracellular non-membrane-bounded organelle;GO:0043229//intracellular organelle;GO:0005623//cell;GO:0044430//cytoskeletal part;GO:0044422//organelle part;GO:0044446//intracellular organelle part;GO:0044464//cell part;GO:0044424//intracellular part	-	-
TCONS_00030740	220.98	5.46333	2.93667	0.06	-5.61307	0.000309077	0.00825482	yes	TMEM229B	XP_012037262.1 PREDICTED: transmembrane protein 229B isoform X1 [Ovis aries]	-	-	-	-	-	-	-
TCONS_00030769	190.367	2.85	1.66333	0.0233333	-6.15554	0.000180783	0.0053115	yes	SPTB	XP_017909555.1 PREDICTED: LOW QUALITY PROTEIN: spectrin beta chain, erythrocytic [Capra hircus]	-	-	-	-	GO:0009898//cytoplasmic side of plasma membrane;GO:0044424//intracellular part;GO:0044444//cytoplasmic part;GO:0032991//macromolecular complex;GO:0005623//cell;GO:0044422//organelle part;GO:0044446//intracellular organelle part;GO:0005886//plasma membrane;GO:0043229//intracellular organelle;GO:0044430//cytoskeletal part;GO:0016020//membrane;GO:0071944//cell periphery;GO:0098562//cytoplasmic side …	GO:0005515//protein binding;GO:0003779//actin binding;GO:0008289//lipid binding;GO:0046983//protein dimerization activity;GO:0005198//structural molecule activity;GO:0005488//binding;GO:0008092//cytoskeletal protein binding	GO:0042330//taxis;GO:1901880//negative regulation of protein depolymerization;GO:1901879//regulation of protein depolymerization;GO:0006935//chemotaxis;GO:0044767//single-organism developmental process;GO:0071840//cellular component organization or biogenesis;GO:0030832//regulation of actin filament length;GO:0030834//regulation of actin filament depolymerization;GO:0051128//regulation of cellula…
TCONS_00031058	188.397	0	2.67333	0.001	-11.3844	4.44659e-05	0.0016684	yes	TCF12	XP_017909749.1 PREDICTED: transcription factor 12 isoform X3 [Capra hircus]	-	-	-	-	GO:0043229//intracellular organelle;GO:0044464//cell part;GO:0043234//protein complex;GO:0032991//macromolecular complex;GO:0005623//cell;GO:0044424//intracellular part;GO:0043227//membrane-bounded organelle;GO:0043231//intracellular membrane-bounded organelle;GO:0043226//organelle;GO:0005622//intracellular	GO:0044212//transcription regulatory region DNA binding;GO:0046983//protein dimerization activity;GO:0008134//transcription factor binding;GO:0003676//nucleic acid binding;GO:0005488//binding;GO:0097159//organic cyclic compound binding;GO:0000975//regulatory region DNA binding;GO:0001071//nucleic acid binding transcription factor activity;GO:0003677//DNA binding;GO:0005515//protein binding;GO:190…	GO:0009889//regulation of biosynthetic process;GO:0010468//regulation of gene expression;GO:2000112//regulation of cellular macromolecule biosynthetic process;GO:2001141//regulation of RNA biosynthetic process;GO:0019222//regulation of metabolic process;GO:0050793//regulation of developmental process;GO:0010556//regulation of macromolecule biosynthetic process;GO:0045595//regulation of cell diffe…
TCONS_00031559	20.3933	583.193	1.25333	21.48	4.09915	0.00082228	0.0181851	yes	EDDM3B	XP_017909265.1 PREDICTED: epididymal secretory protein E3-beta-like [Capra hircus]	-	-	-	-	-	-	-
TCONS_00031609	63.5833	1.04	1.38667	0.02	-6.11548	0.00145109	0.0283789	yes	-	ELR44680.1 T-cell receptor alpha chain V region 2B4, partial [Bos mutus]	Environmental Information Processing;Organismal Systems	Immune system;Signaling molecules and interaction;Signal transduction	ko04014//Ras signaling pathway;ko04015//Rap1 signaling pathway;ko04020//Calcium signaling pathway;ko04514//Cell adhesion molecules (CAMs);ko04660//T cell receptor signaling pathway;ko04064//NF-kappa B signaling pathway;ko04612//Antigen processing and presentation;ko04672//Intestinal immune network for IgA production	K10784	-	-	-
TCONS_00031672	34	0	1.75333	0.001	-10.7759	0.00276871	0.0467341	yes	TCRA	XP_002690635.1 PREDICTED: T-cell receptor alpha chain V region 2B4 [Bos taurus]	-	-	-	-	-	-	-
TCONS_00031674	59.3567	1.88	1.16667	0.0233333	-5.64386	0.00209811	0.0379402	yes	-	AAI47861.1 LOC785621 protein, partial [Bos taurus]	-	-	-	-	-	-	-
TCONS_00031729	656.557	1.13333	27.1767	0.0366667	-9.53368	2.58972e-14	1.17935e-11	yes	TRDC	XP_014945977.1 PREDICTED: uncharacterized protein LOC101106528 isoform X3 [Ovis aries musimon]	-	-	-	-	-	-	-
TCONS_00031734	2011.63	16.7833	96.2533	0.59	-7.34998	6.12279e-18	7.80726e-15	yes	TRDC	CAA78307.1 TCR delta, partial [Ovis aries]	-	-	-	-	-	-	-
TCONS_00031745	2541.58	26.6733	155.7	1.34	-6.86039	5.00823e-13	1.61965e-10	yes	TRAC	AAA63518.1 T-cell receptor alpha [Ovis aries]	-	-	-	-	-	-	-
TCONS_00031747	249.71	0	16	0.001	-13.9658	2.65929e-10	4.06443e-08	yes	TRAC	XP_005978035.1 PREDICTED: uncharacterized protein LOC102317669 [Pantholops hodgsonii]	-	-	-	-	-	-	-
TCONS_00031749	615.097	0	39.0867	0.001	-15.2544	1.48699e-16	1.22894e-13	yes	TRAC	AAA63518.1 T-cell receptor alpha [Ovis aries]	-	-	-	-	-	-	-
TCONS_00031750	752.15	0	44.6833	0.001	-15.4474	1.50463e-14	7.22045e-12	yes	TRAC	AAA63518.1 T-cell receptor alpha [Ovis aries]	-	-	-	-	-	-	-
TCONS_00031752	138.973	6.07333	8	0.246667	-5.01937	6.93481e-05	0.00241792	yes	TRAC	AAA63518.1 T-cell receptor alpha [Ovis aries]	-	-	-	-	-	-	-
TCONS_00031755	259.58	0	14.9567	0.001	-13.8685	2.12243e-07	1.56049e-05	yes	TRAC	AAA63518.1 T-cell receptor alpha [Ovis aries]	-	-	-	-	-	-	-
TCONS_00031759	188.383	0	11.8133	0.001	-13.5281	2.51377e-07	1.82715e-05	yes	TRAC	AAA63518.1 T-cell receptor alpha [Ovis aries]	-	-	-	-	-	-	-
TCONS_00031828	0	48.9733	0.001	0.366667	8.51833	0.00111445	0.0231764	yes	LRRC16B	XP_017910103.1 PREDICTED: capping protein, Arp2/3 and myosin-I linker protein 3 isoform X2 [Capra hircus]	-	-	-	-	-	-	-
TCONS_00032326	56.7767	0	0.46	0.001	-8.84549	0.00246825	0.0427954	yes	NRXN3	XP_011967160.1 PREDICTED: neurexin 3 isoform X1 [Ovis aries musimon]	Environmental Information Processing	Signaling molecules and interaction	ko04514//Cell adhesion molecules (CAMs)	K07377	-	-	GO:0071840//cellular component organization or biogenesis;GO:0050789//regulation of biological process;GO:0044763//single-organism cellular process;GO:0044085//cellular component biogenesis;GO:0009987//cellular process;GO:0048518//positive regulation of biological process;GO:0032501//multicellular organismal process;GO:0007610//behavior;GO:0007154//cell communication;GO:0016043//cellular componen…
TCONS_00032494	827.17	226.45	6.96667	1.46333	-2.25121	0.0015954	0.0304408	yes	SIPA1L1	XP_005686089.1 PREDICTED: signal-induced proliferation-associated 1-like protein 1 isoform X4 [Capra hircus]	Environmental Information Processing	Signal transduction	ko04015//Rap1 signaling pathway	K17701	-	GO:0005515//protein binding;GO:0005488//binding;GO:0005102//receptor binding	GO:0019222//regulation of metabolic process;GO:0007154//cell communication;GO:0051336//regulation of hydrolase activity;GO:0060284//regulation of cell development;GO:0045595//regulation of cell differentiation;GO:0051716//cellular response to stimulus;GO:0022603//regulation of anatomical structure morphogenesis;GO:0050790//regulation of catalytic activity;GO:0007166//cell surface receptor signali…
TCONS_00032588	267.56	0.323333	4.04667	0.00333333	-10.2456	1.83965e-05	0.000780437	yes	MPP5	XP_005961614.1 PREDICTED: MAGUK p55 subfamily member 5 [Pantholops hodgsonii]	Cellular Processes;Environmental Information Processing	Signal transduction;Cellular commiunity	ko04390//Hippo signaling pathway;ko04530//Tight junction	K06091	GO:0031982//vesicle;GO:0043218//compact myelin;GO:0016020//membrane;GO:0043227//membrane-bounded organelle;GO:0043209//myelin sheath;GO:0044424//intracellular part;GO:0043226//organelle;GO:0043229//intracellular organelle;GO:0043231//intracellular membrane-bounded organelle;GO:0031988//membrane-bounded vesicle;GO:0005622//intracellular;GO:0044464//cell part;GO:0005623//cell	GO:0005515//protein binding;GO:0005488//binding	GO:0051179//localization;GO:0009987//cellular process;GO:0044763//single-organism cellular process;GO:0044699//single-organism process;GO:0044707//single-multicellular organism process;GO:0007009//plasma membrane organization;GO:0010256//endomembrane system organization;GO:0044802//single-organism membrane organization;GO:0033036//macromolecule localization;GO:0032501//multicellular organismal pr…
TCONS_00032645	1055.04	32.3567	14.9333	0.376667	-5.3091	4.29221e-07	2.94251e-05	yes	SYNE2	XP_017909569.1 PREDICTED: LOW QUALITY PROTEIN: nesprin-2 [Capra hircus]	-	-	-	-	GO:0043226//organelle;GO:0043232//intracellular non-membrane-bounded organelle;GO:0043292//contractile fiber;GO:0043229//intracellular organelle;GO:0005924//cell-substrate adherens junction;GO:0071944//cell periphery;GO:0044422//organelle part;GO:0005634//nucleus;GO:0044464//cell part;GO:0005635//nuclear envelope;GO:0005912//adherens junction;GO:0016020//membrane;GO:0098589//membrane region;GO:00…	GO:0008092//cytoskeletal protein binding;GO:0005488//binding;GO:0005515//protein binding;GO:0003779//actin binding	GO:0044699//single-organism process;GO:0016043//cellular component organization;GO:0034613//cellular protein localization;GO:0051640//organelle localization;GO:0040011//locomotion;GO:0051674//localization of cell;GO:0040012//regulation of locomotion;GO:0007097//nuclear migration;GO:0006928//movement of cell or subcellular component;GO:0033365//protein localization to organelle;GO:0016477//cell mi…
TCONS_00032823	139.52	0	0.796667	0.001	-9.63783	0.000207431	0.00592666	yes	MYEF2	XP_006077893.1 PREDICTED: myelin expression factor 2 isoform X1 [Bubalus bubalis]	-	-	-	-	-	GO:0005488//binding;GO:0097159//organic cyclic compound binding	-
TCONS_00032884	636.66	26.5333	3.97333	0.116667	-5.08989	1.03069e-05	0.000473723	yes	MYO5A	XP_011974040.1 PREDICTED: unconventional myosin-Va isoform X2 [Ovis aries musimon]	-	-	-	-	GO:0005622//intracellular;GO:0044424//intracellular part;GO:0031513//nonmotile primary cilium;GO:0044446//intracellular organelle part;GO:0098858//actin-based cell projection;GO:0044430//cytoskeletal part;GO:0099503//secretory vesicle;GO:0031410//cytoplasmic vesicle;GO:0043231//intracellular membrane-bounded organelle;GO:0005856//cytoskeleton;GO:0005929//cilium;GO:0031252//cell leading edge;GO:00…	GO:0017016//Ras GTPase binding;GO:0003824//catalytic activity;GO:1901363//heterocyclic compound binding;GO:0046872//metal ion binding;GO:0016817//hydrolase activity, acting on acid anhydrides;GO:0016462//pyrophosphatase activity;GO:0003676//nucleic acid binding;GO:0003723//RNA binding;GO:0032550//purine ribonucleoside binding;GO:0043167//ion binding;GO:0005488//binding;GO:0019899//enzyme binding;…	GO:0048869//cellular developmental process;GO:0043434//response to peptide hormone;GO:0040011//locomotion;GO:0071840//cellular component organization or biogenesis;GO:0007275//multicellular organism development;GO:1901615//organic hydroxy compound metabolic process;GO:0010033//response to organic substance;GO:0032940//secretion by cell;GO:0030048//actin filament-based movement;GO:0043473//pigment…
TCONS_00032959	232.46	1.39333	4.41667	0.02	-7.78681	5.08828e-08	4.38387e-06	yes	MNS1	XP_005685785.1 PREDICTED: meiosis-specific nuclear structural protein 1 [Capra hircus]	-	-	-	-	GO:0031514//motile cilium;GO:0043229//intracellular organelle;GO:0044422//organelle part;GO:0042995//cell projection;GO:0043227//membrane-bounded organelle;GO:0005622//intracellular;GO:0005929//cilium;GO:0043226//organelle;GO:0043234//protein complex;GO:0044464//cell part;GO:0044441//ciliary part;GO:0043231//intracellular membrane-bounded organelle;GO:0044463//cell projection part;GO:0044424//int…	GO:0005488//binding;GO:0005515//protein binding	GO:0016043//cellular component organization;GO:0009987//cellular process;GO:0044763//single-organism cellular process;GO:0007389//pattern specification process;GO:0044767//single-organism developmental process;GO:0044699//single-organism process;GO:0009798//axis specification;GO:0032501//multicellular organismal process;GO:0071840//cellular component organization or biogenesis;GO:0032502//develop…
TCONS_00033013	0	85.3233	0.001	0.7	9.45121	0.00220167	0.0392719	yes	BNIP2	XP_005685755.2 PREDICTED: BCL2/adenovirus E1B 19 kDa protein-interacting protein 2 [Capra hircus]	-	-	-	-	GO:0044422//organelle part;GO:0043228//non-membrane-bounded organelle;GO:0043229//intracellular organelle;GO:0005813//centrosome;GO:0044424//intracellular part;GO:0015630//microtubule cytoskeleton;GO:0005623//cell;GO:0044464//cell part;GO:0044446//intracellular organelle part;GO:0005815//microtubule organizing center;GO:0043226//organelle;GO:0005622//intracellular;GO:0043232//intracellular non-me…	-	GO:0000226//microtubule cytoskeleton organization;GO:0051174//regulation of phosphorus metabolic process;GO:0050789//regulation of biological process;GO:0048522//positive regulation of cellular process;GO:0016265//death;GO:0051056//regulation of small GTPase mediated signal transduction;GO:0009893//positive regulation of metabolic process;GO:0019220//regulation of phosphate metabolic process;GO:0…
TCONS_00033139	191.177	4.27333	5.22667	0.09	-5.85982	7.92684e-06	0.00037836	yes	PTGDR	XP_005956315.1 PREDICTED: prostaglandin D2 receptor-like [Pantholops hodgsonii]	Environmental Information Processing	Signaling molecules and interaction	ko04080//Neuroactive ligand-receptor interaction	K04332	GO:0044425//membrane part;GO:0031224//intrinsic component of membrane;GO:0016020//membrane	GO:0004953//icosanoid receptor activity;GO:0004871//signal transducer activity;GO:0099600//transmembrane receptor activity;GO:0004872//receptor activity;GO:0004954//prostanoid receptor activity;GO:0004930//G-protein coupled receptor activity;GO:0004888//transmembrane signaling receptor activity;GO:0060089//molecular transducer activity;GO:0038023//signaling receptor activity;GO:0004955//prostagla…	GO:0071704//organic substance metabolic process;GO:0007154//cell communication;GO:0070542//response to fatty acid;GO:0044237//cellular metabolic process;GO:0006807//nitrogen compound metabolic process;GO:0009116//nucleoside metabolic process;GO:0042278//purine nucleoside metabolic process;GO:0071310//cellular response to organic substance;GO:0007166//cell surface receptor signaling pathway;GO:000…
TCONS_00033233	1345.7	166.153	10.93	1.12	-3.28672	0.000206159	0.00590244	yes	MAPKBP1	XP_004010520.2 PREDICTED: mitogen-activated protein kinase-binding protein 1 isoform X3 [Ovis aries]	-	-	-	-	-	-	-
TCONS_00033234	592.483	96.7067	5.09	0.656667	-2.95443	0.000466049	0.0115761	yes	MAPKBP1	XP_014952440.1 PREDICTED: mitogen-activated protein kinase-binding protein 1 isoform X2 [Ovis aries]	-	-	-	-	-	-	-
TCONS_00033256	109.577	0	3.72667	0.001	-11.8637	0.00267339	0.0454516	yes	CHP1	NP_001069044.1 calcineurin B homologous protein 1 [Bos taurus]	-	-	-	-	GO:0030054//cell junction;GO:0016023//cytoplasmic, membrane-bounded vesicle;GO:0005623//cell;GO:0044424//intracellular part;GO:0044422//organelle part;GO:0030055//cell-substrate junction;GO:0044444//cytoplasmic part;GO:0031988//membrane-bounded vesicle;GO:0043229//intracellular organelle;GO:0044464//cell part;GO:0005924//cell-substrate adherens junction;GO:0043227//membrane-bounded organelle;GO:0…	GO:0019887//protein kinase regulator activity;GO:0016247//channel regulator activity;GO:0098772//molecular function regulator;GO:0005515//protein binding;GO:0015631//tubulin binding;GO:0019899//enzyme binding;GO:0046872//metal ion binding;GO:0008092//cytoskeletal protein binding;GO:0019207//kinase regulator activity;GO:0043169//cation binding;GO:0005488//binding;GO:0043167//ion binding;GO:0030234…	GO:0006026//aminoglycan catabolic process;GO:0002028//regulation of sodium ion transport;GO:0010556//regulation of macromolecule biosynthetic process;GO:0023051//regulation of signaling;GO:0031647//regulation of protein stability;GO:0043170//macromolecule metabolic process;GO:2001141//regulation of RNA biosynthetic process;GO:1901136//carbohydrate derivative catabolic process;GO:1903320//regulati…
TCONS_00033522	403.107	57.65	5.06333	0.586667	-3.10947	0.00075459	0.0169655	yes	SALL2	XP_012022589.1 PREDICTED: sal-like protein 2 isoform X2 [Ovis aries musimon]	-	-	-	-	GO:0032991//macromolecular complex;GO:0000118//histone deacetylase complex;GO:0043233//organelle lumen;GO:0044464//cell part;GO:0043226//organelle;GO:0044424//intracellular part;GO:0005622//intracellular;GO:0005623//cell;GO:0005654//nucleoplasm;GO:0005634//nucleus;GO:0044446//intracellular organelle part;GO:1902494//catalytic complex;GO:0070013//intracellular organelle lumen;GO:0043231//intracell…	GO:0043167//ion binding;GO:0043169//cation binding;GO:0097159//organic cyclic compound binding;GO:0005488//binding	GO:0010556//regulation of macromolecule biosynthetic process;GO:0044699//single-organism process;GO:0050794//regulation of cellular process;GO:0048856//anatomical structure development;GO:0009889//regulation of biosynthetic process;GO:2001141//regulation of RNA biosynthetic process;GO:0031323//regulation of cellular metabolic process;GO:0051252//regulation of RNA metabolic process;GO:0044707//sin…
TCONS_00033763	211.27	0	4.36333	0.001	-12.0912	3.5308e-10	5.16643e-08	yes	KIF23	XP_015328522.1 PREDICTED: kinesin-like protein KIF23 isoform X4 [Bos taurus]	-	-	-	-	-	-	-
TCONS_00033847	117.1	0	1.88667	0.001	-10.8816	0.000210617	0.0060023	yes	ERO1L	XP_017909153.1 PREDICTED: ERO1-like protein alpha [Capra hircus]	Genetic Information Processing	Folding, sorting and degradation	ko04141//Protein processing in endoplasmic reticulum	K10950	GO:0044422//organelle part;GO:0044424//intracellular part;GO:0031090//organelle membrane;GO:0043229//intracellular organelle;GO:0016020//membrane;GO:0043231//intracellular membrane-bounded organelle;GO:0043226//organelle;GO:0043227//membrane-bounded organelle;GO:0005623//cell;GO:0044464//cell part;GO:0005622//intracellular	GO:0016491//oxidoreductase activity;GO:0003824//catalytic activity;GO:0016667//oxidoreductase activity, acting on a sulfur group of donors;GO:0015036//disulfide oxidoreductase activity	GO:0044763//single-organism cellular process;GO:0044237//cellular metabolic process;GO:0016265//death;GO:0065007//biological regulation;GO:2000021//regulation of ion homeostasis;GO:0009987//cellular process;GO:0050789//regulation of biological process;GO:0023052//signaling;GO:0032844//regulation of homeostatic process;GO:0006575//cellular modified amino acid metabolic process;GO:0071704//organic …
TCONS_00034056	29.63	0	0.63	0.001	-9.29921	0.00167657	0.0317209	yes	BUB1	XP_017910304.1 PREDICTED: mitotic checkpoint serine/threonine-protein kinase BUB1 isoform X3 [Capra hircus]	Organismal Systems;Cellular Processes	Cell growth and death;Endocrine system	ko04110//Cell cycle;ko04114//Oocyte meiosis;ko04914//Progesterone-mediated oocyte maturation	K02178	GO:0005694//chromosome;GO:0044446//intracellular organelle part;GO:0043227//membrane-bounded organelle;GO:0032991//macromolecular complex;GO:0044464//cell part;GO:0005623//cell;GO:0043234//protein complex;GO:0000776//kinetochore;GO:0044427//chromosomal part;GO:0043232//intracellular non-membrane-bounded organelle;GO:0043228//non-membrane-bounded organelle;GO:0000779//condensed chromosome, centrom…	GO:0097367//carbohydrate derivative binding;GO:0004672//protein kinase activity;GO:0032549//ribonucleoside binding;GO:0001882//nucleoside binding;GO:0036094//small molecule binding;GO:1901363//heterocyclic compound binding;GO:0016772//transferase activity, transferring phosphorus-containing groups;GO:0032550//purine ribonucleoside binding;GO:0016740//transferase activity;GO:0001883//purine nucleo…	GO:0009987//cellular process;GO:0000278//mitotic cell cycle;GO:0010564//regulation of cell cycle process;GO:0065007//biological regulation;GO:0006915//apoptotic process;GO:0035556//intracellular signal transduction;GO:0050896//response to stimulus;GO:0050789//regulation of biological process;GO:0051726//regulation of cell cycle;GO:0007049//cell cycle;GO:0043412//macromolecule modification;GO:0097…
TCONS_00034109	254.38	7.27333	5.47667	0.106667	-5.68212	2.0802e-06	0.000116888	yes	Zap70	XP_017910370.1 PREDICTED: tyrosine-protein kinase ZAP-70 [Capra hircus]	Organismal Systems;Environmental Information Processing	Immune system;Signal transduction	ko04014//Ras signaling pathway;ko04650//Natural killer cell mediated cytotoxicity;ko04660//T cell receptor signaling pathway;ko04064//NF-kappa B signaling pathway	K07360	-	-	-
TCONS_00034145	0	106.857	0.001	1	9.96578	0.00145223	0.0283889	yes	EIF5B	XP_019309967.1 PREDICTED: eukaryotic translation initiation factor 5B isoform X2 [Panthera pardus]	Genetic Information Processing	Translation	ko03013//RNA transport	K03243	-	GO:0016787//hydrolase activity;GO:0001882//nucleoside binding;GO:0016462//pyrophosphatase activity;GO:1901363//heterocyclic compound binding;GO:0016817//hydrolase activity, acting on acid anhydrides;GO:0003723//RNA binding;GO:0001883//purine nucleoside binding;GO:0097159//organic cyclic compound binding;GO:0032549//ribonucleoside binding;GO:0097367//carbohydrate derivative binding;GO:0017111//nuc…	GO:0006518//peptide metabolic process;GO:0043043//peptide biosynthetic process;GO:0009059//macromolecule biosynthetic process;GO:0044267//cellular protein metabolic process;GO:0044238//primary metabolic process;GO:0006412//translation;GO:0009987//cellular process;GO:1901566//organonitrogen compound biosynthetic process;GO:0071704//organic substance metabolic process;GO:0034641//cellular nitrogen …
TCONS_00034432	0	66.2433	0.001	0.83	9.69697	0.000445996	0.011126	yes	VIT	XP_013823006.2 PREDICTED: vitrin isoform X2 [Capra hircus]	-	-	-	-	GO:0005578//proteinaceous extracellular matrix;GO:0031012//extracellular matrix;GO:0005576//extracellular region;GO:0044421//extracellular region part	-	GO:0010810//regulation of cell-substrate adhesion;GO:0071840//cellular component organization or biogenesis;GO:0065007//biological regulation;GO:0043062//extracellular structure organization;GO:0044763//single-organism cellular process;GO:0050789//regulation of biological process;GO:0044699//single-organism process;GO:0009987//cellular process;GO:0030155//regulation of cell adhesion;GO:0050794//r…
TCONS_00034848	4433.36	31.3	119.72	0.71	-7.39763	2.02742e-08	1.93337e-06	yes	CD8A	XP_017910842.1 PREDICTED: T-cell surface glycoprotein CD8 alpha chain [Capra hircus]	Organismal Systems;Environmental Information Processing	Signaling molecules and interaction;Immune system	ko04514//Cell adhesion molecules (CAMs);ko04660//T cell receptor signaling pathway;ko04640//Hematopoietic cell lineage;ko04612//Antigen processing and presentation	K06458	GO:0044425//membrane part;GO:0016020//membrane;GO:0005623//cell;GO:0005886//plasma membrane;GO:0044464//cell part;GO:0031224//intrinsic component of membrane;GO:0044459//plasma membrane part;GO:0071944//cell periphery	GO:0046983//protein dimerization activity;GO:0005488//binding;GO:0005515//protein binding	GO:0009987//cellular process;GO:0002252//immune effector process;GO:0030217//T cell differentiation;GO:0042110//T cell activation;GO:0044707//single-multicellular organism process;GO:0048534//hematopoietic or lymphoid organ development;GO:0070486//leukocyte aggregation;GO:0032502//developmental process;GO:0065007//biological regulation;GO:0001775//cell activation;GO:0002376//immune system process…
TCONS_00034871	526.41	133.56	8.18333	1.54667	-2.40353	0.000705576	0.0160823	yes	POLR1A	XP_017910857.1 PREDICTED: LOW QUALITY PROTEIN: DNA-directed RNA polymerase I subunit RPA1 [Capra hircus]	Metabolism;Genetic Information Processing	Global and Overview;Nucleotide metabolism;Transcription	ko01100//Metabolic pathways;ko00230//Purine metabolism;ko00240//Pyrimidine metabolism;ko03020//RNA polymerase	K02999	-	-	-
TCONS_00035244	47.4567	0	0.646667	0.001	-9.33688	0.000481726	0.0118845	yes	LDAH	XP_005687026.2 PREDICTED: lipid droplet-associated hydrolase isoform X3 [Capra hircus]	-	-	-	-	-	-	-
TCONS_00035729	0	161.973	0.001	2.78667	11.4443	1.06532e-06	6.62175e-05	yes	AIF1L	XP_005982769.1 PREDICTED: allograft inflammatory factor 1-like [Pantholops hodgsonii]	-	-	-	-	GO:0032991//macromolecular complex;GO:0015629//actin cytoskeleton;GO:0071944//cell periphery;GO:0031988//membrane-bounded vesicle;GO:0043227//membrane-bounded organelle;GO:0042995//cell projection;GO:0043232//intracellular non-membrane-bounded organelle;GO:0070161//anchoring junction;GO:0005623//cell;GO:0043228//non-membrane-bounded organelle;GO:0005912//adherens junction;GO:0043226//organelle;GO…	GO:0005515//protein binding;GO:0043169//cation binding;GO:0043167//ion binding;GO:0008092//cytoskeletal protein binding;GO:0003779//actin binding;GO:0005488//binding	-
TCONS_00035744	756.153	127.53	4.3	0.596667	-2.84934	0.000708382	0.0161298	yes	PRRC2B	XP_017911491.1 PREDICTED: protein PRRC2B isoform X2 [Capra hircus]	-	-	-	-	-	-	-
TCONS_00035907	46.2133	0	0.606667	0.001	-9.24476	0.00122902	0.0250114	yes	ENTPD8	XP_017911715.1 PREDICTED: ectonucleoside triphosphate diphosphohydrolase 8 isoform X1 [Capra hircus]	Metabolism	Nucleotide metabolism	ko00230//Purine metabolism;ko00240//Pyrimidine metabolism	K01510	GO:0031224//intrinsic component of membrane;GO:0016020//membrane;GO:0044425//membrane part	GO:0036094//small molecule binding;GO:0043167//ion binding;GO:0005488//binding;GO:0003824//catalytic activity;GO:0043169//cation binding;GO:0016787//hydrolase activity;GO:0016818//hydrolase activity, acting on acid anhydrides, in phosphorus-containing anhydrides;GO:0016817//hydrolase activity, acting on acid anhydrides;GO:0016462//pyrophosphatase activity	GO:0009132//nucleoside diphosphate metabolic process;GO:1901360//organic cyclic compound metabolic process;GO:0044238//primary metabolic process;GO:0006139//nucleobase-containing compound metabolic process;GO:0044281//small molecule metabolic process;GO:0055086//nucleobase-containing small molecule metabolic process;GO:0044237//cellular metabolic process;GO:0008152//metabolic process;GO:0009123//…
TCONS_00035971	118.98	5.26667	3.55	0.123333	-4.84718	0.000371988	0.00968581	yes	ACOXL	XP_012029285.1 PREDICTED: acyl-coenzyme A oxidase-like protein isoform X1 [Ovis aries]	-	-	-	-	GO:0043226//organelle;GO:0043229//intracellular organelle;GO:0005623//cell;GO:0044464//cell part;GO:0042579//microbody;GO:0005737//cytoplasm;GO:0043227//membrane-bounded organelle;GO:0044424//intracellular part;GO:0043231//intracellular membrane-bounded organelle;GO:0044444//cytoplasmic part;GO:0005622//intracellular	GO:0036094//small molecule binding;GO:0097159//organic cyclic compound binding;GO:0005488//binding;GO:0003824//catalytic activity;GO:0016627//oxidoreductase activity, acting on the CH-CH group of donors;GO:1901363//heterocyclic compound binding;GO:0016634//oxidoreductase activity, acting on the CH-CH group of donors, oxygen as acceptor;GO:0000166//nucleotide binding;GO:1901265//nucleoside phospha…	GO:0044281//small molecule metabolic process;GO:0044238//primary metabolic process;GO:0032787//monocarboxylic acid metabolic process;GO:0006629//lipid metabolic process;GO:0043436//oxoacid metabolic process;GO:0044248//cellular catabolic process;GO:0016054//organic acid catabolic process;GO:0044237//cellular metabolic process;GO:0006082//organic acid metabolic process;GO:0006631//fatty acid metab…
TCONS_00036096	1567.69	83.22	9.58333	0.38	-4.65646	3.26577e-10	4.80912e-08	yes	AFF3	XP_014962108.1 PREDICTED: AF4/FMR2 family member 3 isoform X6 [Ovis aries musimon]	-	-	-	-	GO:0043231//intracellular membrane-bounded organelle;GO:0005622//intracellular;GO:0043229//intracellular organelle;GO:0043227//membrane-bounded organelle;GO:0043226//organelle;GO:0044464//cell part;GO:0005623//cell;GO:0044424//intracellular part	-	GO:0044767//single-organism developmental process;GO:0050896//response to stimulus;GO:0042221//response to chemical;GO:0035108//limb morphogenesis;GO:0009790//embryo development;GO:0048598//embryonic morphogenesis;GO:0034097//response to cytokine;GO:0048736//appendage development;GO:0044699//single-organism process;GO:0032502//developmental process;GO:0030326//embryonic limb morphogenesis;GO:0010…
TCONS_00036107	231.407	44.2133	3.75	0.476667	-2.97584	0.000822198	0.0181851	yes	X-element\ORF2	ELR61013.1 hypothetical protein M91_09415, partial [Bos mutus]	-	-	-	-	-	-	-
TCONS_00036209	165.107	3.85667	1.42333	0.0233333	-5.93074	0.000229136	0.00645182	yes	ALMS1	XP_017910525.1 PREDICTED: Alstrom syndrome protein 1 isoform X5 [Capra hircus]	-	-	-	-	GO:0043228//non-membrane-bounded organelle;GO:0005815//microtubule organizing center;GO:0005622//intracellular;GO:0044424//intracellular part;GO:0044464//cell part;GO:0005856//cytoskeleton;GO:0044430//cytoskeletal part;GO:0005623//cell;GO:0043229//intracellular organelle;GO:0043226//organelle;GO:0044446//intracellular organelle part;GO:0015630//microtubule cytoskeleton;GO:0043232//intracellular n…	-	GO:1902582//single-organism intracellular transport;GO:0044699//single-organism process;GO:0050794//regulation of cellular process;GO:0032970//regulation of actin filament-based process;GO:0051179//localization;GO:0065007//biological regulation;GO:0044087//regulation of cellular component biogenesis;GO:0051649//establishment of localization in cell;GO:0051493//regulation of cytoskeleton organizat…
TCONS_00036276	54.6833	0	1.34	0.001	-10.388	0.000568388	0.0136014	yes	NLRC4	XP_005686455.2 PREDICTED: NLR family CARD domain-containing protein 4 [Capra hircus]	Organismal Systems	Immune system	ko04621//NOD-like receptor signaling pathway	K12805	-	-	-
TCONS_00037035	325.343	2.32	5.35333	0.0266667	-7.64926	6.00373e-08	5.05548e-06	yes	CENPA	EAX00671.1 centromere protein A, 17kDa, isoform CRA_b [Homo sapiens]	-	-	-	-	GO:0005737//cytoplasm;GO:0031981//nuclear lumen;GO:0000775//chromosome, centromeric region;GO:0000776//kinetochore;GO:0005623//cell;GO:0044428//nuclear part;GO:0044444//cytoplasmic part;GO:0043234//protein complex;GO:0044427//chromosomal part;GO:0031974//membrane-enclosed lumen;GO:0044422//organelle part;GO:0032991//macromolecular complex;GO:0044446//intracellular organelle part;GO:0043232//intra…	GO:0003676//nucleic acid binding;GO:0005515//protein binding;GO:0046983//protein dimerization activity;GO:0097159//organic cyclic compound binding;GO:1901363//heterocyclic compound binding;GO:0005488//binding	GO:0044700//single organism signaling;GO:0016568//chromatin modification;GO:0033365//protein localization to organelle;GO:0065007//biological regulation;GO:0022403//cell cycle phase;GO:0070727//cellular macromolecule localization;GO:0043623//cellular protein complex assembly;GO:0007017//microtubule-based process;GO:0051656//establishment of organelle localization;GO:0051649//establishment of loca…
TCONS_00037267	0	117.603	0.001	1.21	10.2408	0.000889445	0.019388	yes	Rnf144a	XP_005194008.1 PREDICTED: E3 ubiquitin-protein ligase RNF144A isoform X2 [Bos taurus]	-	-	-	-	-	GO:0005488//binding;GO:0043167//ion binding;GO:0046872//metal ion binding;GO:0046914//transition metal ion binding;GO:0043169//cation binding	-
TCONS_00037513	1710.06	154.39	24.3167	1.59333	-3.93183	5.99687e-09	6.41809e-07	yes	FNBP1	XP_017911468.1 PREDICTED: formin-binding protein 1 isoform X12 [Capra hircus]	-	-	-	-	-	GO:0005488//binding;GO:0005515//protein binding	-
TCONS_00037584	185.953	0	3	0.001	-11.5507	5.11683e-06	0.000259794	yes	Ralgds	XP_011973534.1 PREDICTED: ral guanine nucleotide dissociation stimulator isoform X6 [Ovis aries musimon]	Environmental Information Processing	Signal transduction	ko04014//Ras signaling pathway;ko04015//Rap1 signaling pathway;ko04072//Phospholipase D signaling pathway	K08732	GO:0005623//cell;GO:0044464//cell part	-	GO:0051336//regulation of hydrolase activity;GO:0050790//regulation of catalytic activity;GO:0050789//regulation of biological process;GO:0043087//regulation of GTPase activity;GO:0065009//regulation of molecular function;GO:0019222//regulation of metabolic process;GO:0065007//biological regulation
TCONS_00037915	176.23	0	2.00667	0.001	-10.9706	6.65609e-07	4.33024e-05	yes	GPR183	XP_011974714.1 PREDICTED: G-protein coupled receptor 183-A-like [Ovis aries musimon]	-	-	-	-	-	-	-
TCONS_00037916	38.37	0	0.49	0.001	-8.93664	0.00209609	0.0379345	yes	gpr183	XP_005687783.2 PREDICTED: G-protein coupled receptor 183-like [Capra hircus]	-	-	-	-	GO:0031224//intrinsic component of membrane;GO:0016020//membrane;GO:0044425//membrane part	GO:0097159//organic cyclic compound binding;GO:0043178//alcohol binding;GO:0060089//molecular transducer activity;GO:0008289//lipid binding;GO:0005488//binding;GO:0036094//small molecule binding;GO:0005496//steroid binding;GO:0032934//sterol binding	GO:0009967//positive regulation of signal transduction;GO:0050794//regulation of cellular process;GO:0032270//positive regulation of cellular protein metabolic process;GO:0031399//regulation of protein modification process;GO:0051716//cellular response to stimulus;GO:1902531//regulation of intracellular signal transduction;GO:0007165//signal transduction;GO:0045937//positive regulation of phospha…
TCONS_00038085	1027.19	241.19	6.88	1.12333	-2.61462	3.24873e-05	0.00127518	yes	KLF12	XP_005687749.2 PREDICTED: Krueppel-like factor 12 [Capra hircus]	-	-	-	-	-	GO:1901363//heterocyclic compound binding;GO:0000976//transcription regulatory region sequence-specific DNA binding;GO:0003690//double-stranded DNA binding;GO:0005488//binding;GO:0044212//transcription regulatory region DNA binding;GO:0000981//RNA polymerase II transcription factor activity, sequence-specific DNA binding;GO:0003676//nucleic acid binding;GO:0000975//regulatory region DNA binding;G…	GO:0009889//regulation of biosynthetic process;GO:0065007//biological regulation;GO:0031323//regulation of cellular metabolic process;GO:1903506//regulation of nucleic acid-templated transcription;GO:2001141//regulation of RNA biosynthetic process;GO:0051252//regulation of RNA metabolic process;GO:0031326//regulation of cellular biosynthetic process;GO:0080090//regulation of primary metabolic pro…
TCONS_00038194	64.4333	0	1.7	0.001	-10.7313	0.000111022	0.00359825	yes	-	XP_012770936.1 hypothetical protein, conserved [Babesia bigemina]	-	-	-	-	-	-	-
TCONS_00038246	17.8367	509.15	0.143333	2.40667	4.06959	0.000903205	0.0196247	yes	FRY	XP_013823611.1 PREDICTED: protein furry homolog isoform X5 [Capra hircus]	-	-	-	-	-	-	-
TCONS_00038809	419.24	62.0167	5.3	0.536667	-3.30389	3.50458e-05	0.00136242	yes	Spata13	XP_017912051.1 PREDICTED: spermatogenesis-associated protein 13 isoform X1 [Capra hircus]	-	-	-	-	-	-	GO:0019222//regulation of metabolic process;GO:0050789//regulation of biological process;GO:0051336//regulation of hydrolase activity;GO:0043087//regulation of GTPase activity;GO:0065009//regulation of molecular function;GO:0065007//biological regulation;GO:0050790//regulation of catalytic activity
TCONS_00038811	0	360.763	0.001	3.2	11.6439	1.58484e-11	3.40047e-09	yes	Spata13	XP_017912051.1 PREDICTED: spermatogenesis-associated protein 13 isoform X1 [Capra hircus]	-	-	-	-	-	-	GO:0065009//regulation of molecular function;GO:0050790//regulation of catalytic activity;GO:0043087//regulation of GTPase activity;GO:0050789//regulation of biological process;GO:0065007//biological regulation;GO:0019222//regulation of metabolic process;GO:0051336//regulation of hydrolase activity
TCONS_00038812	1172.86	180.627	12.92	1.57333	-3.03771	0.000139031	0.00429695	yes	SPATA13	XP_017912051.1 PREDICTED: spermatogenesis-associated protein 13 isoform X1 [Capra hircus]	-	-	-	-	-	-	GO:0065009//regulation of molecular function;GO:0050790//regulation of catalytic activity;GO:0065007//biological regulation;GO:0019222//regulation of metabolic process;GO:0051336//regulation of hydrolase activity;GO:0050789//regulation of biological process;GO:0043087//regulation of GTPase activity
TCONS_00039002	114.673	0	1.43333	0.001	-10.4852	0.000552619	0.0133047	yes	FOXO1	XP_017912175.1 PREDICTED: forkhead box protein O1 [Capra hircus]	Environmental Information Processing;Organismal Systems	Endocrine system;Aging;Signal transduction	ko04910//Insulin signaling pathway;ko04068//FoxO signaling pathway;ko04152//AMPK signaling pathway;ko04919//Thyroid hormone signaling pathway;ko04211//Longevity regulating pathway - mammal;ko04922//Glucagon signaling pathway;ko04213//Longevity regulating pathway - multiple species	K07201	-	-	-
TCONS_00039040	106.82	1.92667	3.36667	0.0466667	-6.17278	0.000730045	0.0165387	yes	RNASEH2B	AAI03281.1 RNASEH2B protein, partial [Bos taurus]	Genetic Information Processing	Replication and repair	ko03030//DNA replication	K10744	GO:0032991//macromolecular complex;GO:0005623//cell;GO:0043234//protein complex;GO:0044424//intracellular part;GO:0043231//intracellular membrane-bounded organelle;GO:0044464//cell part;GO:0043227//membrane-bounded organelle;GO:0043229//intracellular organelle;GO:0005622//intracellular;GO:0043226//organelle	GO:0016787//hydrolase activity;GO:0004519//endonuclease activity;GO:0016891//endoribonuclease activity, producing 5'-phosphomonoesters;GO:0004518//nuclease activity;GO:0016893//endonuclease activity, active with either ribo- or deoxyribonucleic acids and producing 5'-phosphomonoesters;GO:0004521//endoribonuclease activity;GO:0004540//ribonuclease activity;GO:0016788//hydrolase activity, acting on…	GO:0000075//cell cycle checkpoint;GO:0019222//regulation of metabolic process;GO:0044260//cellular macromolecule metabolic process;GO:0055086//nucleobase-containing small molecule metabolic process;GO:0050794//regulation of cellular process;GO:1901360//organic cyclic compound metabolic process;GO:0090304//nucleic acid metabolic process;GO:0008152//metabolic process;GO:0006725//cellular aromatic c…
TCONS_00039096	74.46	0	1.29667	0.001	-10.3406	2.27899e-05	0.000939143	yes	LRCH1	XP_017912246.1 PREDICTED: leucine-rich repeat and calponin homology domain-containing protein 1 isoform X2 [Capra hircus]	-	-	-	-	-	-	-
TCONS_00039102	51.0833	0	0.8	0.001	-9.64386	0.000196146	0.00566977	yes	COG3	XP_012017588.1 PREDICTED: conserved oligomeric Golgi complex subunit 3 isoform X3 [Ovis aries musimon]	-	-	-	-	-	-	-
TCONS_00039154	79.6467	0	0.633333	0.001	-9.30682	0.000733704	0.0166047	yes	AKAP11	XP_017912277.1 PREDICTED: A-kinase anchor protein 11 isoform X2 [Capra hircus]	-	-	-	-	-	-	-
TCONS_00039157	126.02	0.00333333	0.696667	0.001	-9.44432	0.00200248	0.0366115	yes	DGKH	XP_017912280.1 PREDICTED: diacylglycerol kinase eta isoform X1 [Capra hircus]	Environmental Information Processing;Metabolism	Lipid metabolism;Global and Overview;Signal transduction	ko01100//Metabolic pathways;ko04072//Phospholipase D signaling pathway;ko04070//Phosphatidylinositol signaling system;ko00564//Glycerophospholipid metabolism;ko01110//Biosynthesis of secondary metabolites;ko00561//Glycerolipid metabolism	K00901	GO:0005622//intracellular;GO:0016020//membrane;GO:0043231//intracellular membrane-bounded organelle;GO:0005623//cell;GO:0043227//membrane-bounded organelle;GO:0031090//organelle membrane;GO:0043226//organelle;GO:0044424//intracellular part;GO:0044422//organelle part;GO:0043229//intracellular organelle;GO:0044464//cell part	GO:0097159//organic cyclic compound binding;GO:0036094//small molecule binding;GO:0003824//catalytic activity;GO:1901363//heterocyclic compound binding;GO:0005515//protein binding;GO:0005488//binding;GO:0016740//transferase activity;GO:0032549//ribonucleoside binding;GO:0097367//carbohydrate derivative binding;GO:0046983//protein dimerization activity;GO:0001883//purine nucleoside binding;GO:0016…	GO:0071822//protein complex subunit organization;GO:0006461//protein complex assembly;GO:0042221//response to chemical;GO:0044700//single organism signaling;GO:0006793//phosphorus metabolic process;GO:0023052//signaling;GO:0065007//biological regulation;GO:0044237//cellular metabolic process;GO:0044699//single-organism process;GO:0071840//cellular component organization or biogenesis;GO:0016043//…
TCONS_00039311	1175.39	208.077	20.1233	2.92333	-2.78318	0.000407882	0.0104019	yes	GATA3	NP_001070272.1 trans-acting T-cell-specific transcription factor GATA-3 [Bos taurus]	-	-	-	-	GO:0043227//membrane-bounded organelle;GO:0043232//intracellular non-membrane-bounded organelle;GO:0005694//chromosome;GO:0032991//macromolecular complex;GO:0044464//cell part;GO:0044424//intracellular part;GO:0005623//cell;GO:0044446//intracellular organelle part;GO:0043231//intracellular membrane-bounded organelle;GO:0043226//organelle;GO:0000785//chromatin;GO:0044422//organelle part;GO:0005622…	GO:0019904//protein domain specific binding;GO:0003676//nucleic acid binding;GO:0046872//metal ion binding;GO:0003712//transcription cofactor activity;GO:0097159//organic cyclic compound binding;GO:0003690//double-stranded DNA binding;GO:0005102//receptor binding;GO:0005515//protein binding;GO:0000977//RNA polymerase II regulatory region sequence-specific DNA binding;GO:0044212//transcription reg…	GO:1901615//organic hydroxy compound metabolic process;GO:0031399//regulation of protein modification process;GO:0034097//response to cytokine;GO:0042221//response to chemical;GO:0006355//regulation of transcription, DNA-templated;GO:0003205//cardiac chamber development;GO:0048015//phosphatidylinositol-mediated signaling;GO:0032268//regulation of cellular protein metabolic process;GO:0046631//alp…
TCONS_00039384	3062.01	387.503	8.71333	0.756667	-3.52549	5.79222e-08	4.89585e-06	yes	Pol	ELR50693.1 Spectrin beta chain, brain 2 [Bos mutus]	-	-	-	-	GO:0044464//cell part;GO:0043227//membrane-bounded organelle;GO:0043226//organelle;GO:0043231//intracellular membrane-bounded organelle;GO:0005623//cell;GO:0044424//intracellular part;GO:0016020//membrane;GO:0044425//membrane part;GO:0005622//intracellular;GO:0031224//intrinsic component of membrane;GO:0043229//intracellular organelle	GO:0005488//binding	GO:0015980//energy derivation by oxidation of organic compounds;GO:0044699//single-organism process;GO:0050896//response to stimulus;GO:0006091//generation of precursor metabolites and energy;GO:0023052//signaling;GO:0044237//cellular metabolic process;GO:0044700//single organism signaling;GO:0050789//regulation of biological process;GO:0055114//oxidation-reduction process;GO:0009987//cellular pr…
TCONS_00039543	375.833	104.153	2.56	0.48	-2.41504	0.00106577	0.0223702	yes	MCM10	XP_013823967.2 PREDICTED: protein MCM10 homolog [Capra hircus]	-	-	-	-	GO:0005622//intracellular;GO:0043228//non-membrane-bounded organelle;GO:0043226//organelle;GO:0043229//intracellular organelle;GO:0044424//intracellular part;GO:0043232//intracellular non-membrane-bounded organelle;GO:0044464//cell part;GO:0005623//cell;GO:0043227//membrane-bounded organelle;GO:0043231//intracellular membrane-bounded organelle	GO:0005515//protein binding;GO:0005488//binding	GO:0008152//metabolic process;GO:0034641//cellular nitrogen compound metabolic process;GO:0090304//nucleic acid metabolic process;GO:0006725//cellular aromatic compound metabolic process;GO:0044699//single-organism process;GO:0043170//macromolecule metabolic process;GO:0071704//organic substance metabolic process;GO:0046483//heterocycle metabolic process;GO:0009987//cellular process;GO:0044237//c…
TCONS_00040310	401.103	27.6567	10.2433	0.506667	-4.3375	0.000154111	0.00467078	yes	TPX2	XP_005688420.2 PREDICTED: targeting protein for Xklp2 isoform X3 [Capra hircus]	-	-	-	-	GO:0030424//axon;GO:0043228//non-membrane-bounded organelle;GO:0043232//intracellular non-membrane-bounded organelle;GO:0043229//intracellular organelle;GO:0044464//cell part;GO:0005622//intracellular;GO:0033267//axon part;GO:0005856//cytoskeleton;GO:0042995//cell projection;GO:0043227//membrane-bounded organelle;GO:0005623//cell;GO:0097458//neuron part;GO:0044424//intracellular part;GO:0043005//…	GO:0019899//enzyme binding;GO:0019900//kinase binding;GO:0005515//protein binding;GO:0005488//binding	GO:0044699//single-organism process;GO:0019222//regulation of metabolic process;GO:0000278//mitotic cell cycle;GO:0019220//regulation of phosphate metabolic process;GO:0008219//cell death;GO:0051246//regulation of protein metabolic process;GO:0051174//regulation of phosphorus metabolic process;GO:0007010//cytoskeleton organization;GO:0065007//biological regulation;GO:0016043//cellular component o…
TCONS_00040328	226.26	24.93	12.3533	0.843333	-3.87265	0.000400844	0.0102812	yes	HCK	NP_001103664.1 tyrosine-protein kinase HCK isoform 1 [Bos taurus]	Organismal Systems	Immune system	ko04062//Chemokine signaling pathway;ko04666//Fc gamma R-mediated phagocytosis	K08893	-	GO:0032550//purine ribonucleoside binding;GO:0097367//carbohydrate derivative binding;GO:0004713//protein tyrosine kinase activity;GO:0016773//phosphotransferase activity, alcohol group as acceptor;GO:0036094//small molecule binding;GO:0005488//binding;GO:0001882//nucleoside binding;GO:0032549//ribonucleoside binding;GO:0016772//transferase activity, transferring phosphorus-containing groups;GO:0…	GO:0071840//cellular component organization or biogenesis;GO:0009987//cellular process;GO:0043412//macromolecule modification;GO:0050896//response to stimulus;GO:0051179//localization;GO:0006793//phosphorus metabolic process;GO:0051707//response to other organism;GO:0050789//regulation of biological process;GO:0008152//metabolic process;GO:0009607//response to biotic stimulus;GO:0019538//protein …
TCONS_00040349	2211.35	300.82	21.29	2.36	-3.17332	5.44655e-05	0.00197621	yes	Asx	XP_017913188.1 PREDICTED: putative Polycomb group protein ASXL1 isoform X2 [Capra hircus]	-	-	-	-	GO:0044446//intracellular organelle part;GO:0043232//intracellular non-membrane-bounded organelle;GO:0044422//organelle part;GO:0031982//vesicle;GO:0043234//protein complex;GO:0043229//intracellular organelle;GO:0044427//chromosomal part;GO:0000785//chromatin;GO:0005623//cell;GO:0043228//non-membrane-bounded organelle;GO:0031519//PcG protein complex;GO:0005694//chromosome;GO:0043227//membrane-bou…	GO:0005102//receptor binding;GO:0003676//nucleic acid binding;GO:0000988//transcription factor activity, protein binding;GO:0005488//binding;GO:0008134//transcription factor binding;GO:0097159//organic cyclic compound binding;GO:0000989//transcription factor activity, transcription factor binding;GO:0003712//transcription cofactor activity;GO:0005515//protein binding;GO:1901363//heterocyclic comp…	GO:0044699//single-organism process;GO:0010556//regulation of macromolecule biosynthetic process;GO:0006508//proteolysis;GO:0010648//negative regulation of cell communication;GO:0051093//negative regulation of developmental process;GO:0048731//system development;GO:0048856//anatomical structure development;GO:0019222//regulation of metabolic process;GO:0016570//histone modification;GO:0051276//ch…
TCONS_00040423	680.033	183.87	34.5033	7.38333	-2.22439	0.00286032	0.0477923	yes	Raly	XP_017913222.1 PREDICTED: RNA-binding protein Raly isoform X2 [Capra hircus]	-	-	-	-	GO:0043229//intracellular organelle;GO:0044424//intracellular part;GO:0043227//membrane-bounded organelle;GO:0044464//cell part;GO:0044446//intracellular organelle part;GO:0005623//cell;GO:1990904//ribonucleoprotein complex;GO:0043231//intracellular membrane-bounded organelle;GO:0044428//nuclear part;GO:0005622//intracellular;GO:0005634//nucleus;GO:0043226//organelle;GO:0005681//spliceosomal comp…	GO:0097159//organic cyclic compound binding;GO:0003676//nucleic acid binding;GO:0005488//binding;GO:0003723//RNA binding;GO:1901363//heterocyclic compound binding	-
TCONS_00040579	50.4033	0	3.16	0.001	-11.6257	0.000619803	0.0145279	yes	Pol	BAA25253.1 unnamed protein product [Canis lupus familiaris]	-	-	-	-	-	-	-
TCONS_00040654	338.703	36.3967	8.11	0.636667	-3.67109	1.61844e-05	0.000700577	yes	MYBL2	XP_017913382.1 PREDICTED: myb-related protein B [Capra hircus]	-	-	-	-	GO:0005623//cell;GO:0043227//membrane-bounded organelle;GO:0043226//organelle;GO:0032991//macromolecular complex;GO:0044424//intracellular part;GO:0043229//intracellular organelle;GO:0043234//protein complex;GO:0005622//intracellular;GO:0043231//intracellular membrane-bounded organelle;GO:0044464//cell part	GO:0001071//nucleic acid binding transcription factor activity;GO:0000982//transcription factor activity, RNA polymerase II core promoter proximal region sequence-specific binding;GO:0003700//transcription factor activity, sequence-specific DNA binding;GO:0000981//RNA polymerase II transcription factor activity, sequence-specific DNA binding;GO:0097159//organic cyclic compound binding;GO:1901363/…	GO:0044763//single-organism cellular process;GO:0031323//regulation of cellular metabolic process;GO:0065007//biological regulation;GO:0043933//macromolecular complex subunit organization;GO:0080090//regulation of primary metabolic process;GO:0060255//regulation of macromolecule metabolic process;GO:0019219//regulation of nucleobase-containing compound metabolic process;GO:0000226//microtubule cy…
TCONS_00040707	240.993	7.02667	21.5767	0.38	-5.82733	8.68266e-05	0.00290261	yes	-	XP_005688658.1 PREDICTED: spleen trypsin inhibitor I [Capra hircus]	-	-	-	-	-	-	GO:0009892//negative regulation of metabolic process;GO:0010466//negative regulation of peptidase activity;GO:0048519//negative regulation of biological process;GO:0050794//regulation of cellular process;GO:0045861//negative regulation of proteolysis;GO:0065007//biological regulation;GO:0065009//regulation of molecular function;GO:0031324//negative regulation of cellular metabolic process;GO:0052…
TCONS_00040877	128.397	0	2.69667	0.001	-11.397	2.40977e-07	1.75728e-05	yes	PRKCQ	XP_004014222.1 PREDICTED: protein kinase C theta type isoform X1 [Ovis aries]	Organismal Systems;Environmental Information Processing;Cellular Processes	Signal transduction;Sensory system;Cellular commiunity;Circulatory system;Endocrine system;Immune system	ko04530//Tight junction;ko04270//Vascular smooth muscle contraction;ko04660//T cell receptor signaling pathway;ko04750//Inflammatory mediator regulation of TRP channels;ko04064//NF-kappa B signaling pathway;ko04920//Adipocytokine signaling pathway	K18052	GO:0044424//intracellular part;GO:0071944//cell periphery;GO:0005623//cell;GO:0044425//membrane part;GO:0005737//cytoplasm;GO:0044444//cytoplasmic part;GO:0005622//intracellular;GO:0005886//plasma membrane;GO:0044459//plasma membrane part;GO:0044464//cell part;GO:0016020//membrane	GO:0032550//purine ribonucleoside binding;GO:0016773//phosphotransferase activity, alcohol group as acceptor;GO:0003824//catalytic activity;GO:0016740//transferase activity;GO:1901363//heterocyclic compound binding;GO:0004674//protein serine/threonine kinase activity;GO:0019787//ubiquitin-like protein transferase activity;GO:0097159//organic cyclic compound binding;GO:0032549//ribonucleoside bind…	GO:0010628//positive regulation of gene expression;GO:0050865//regulation of cell activation;GO:0035712//T-helper 2 cell activation;GO:0007275//multicellular organism development;GO:0070489//T cell aggregation;GO:0051240//positive regulation of multicellular organismal process;GO:0050878//regulation of body fluid levels;GO:0042110//T cell activation;GO:0010941//regulation of cell death;GO:0048518…
TCONS_00040878	228.947	4.10667	3.42667	0.0433333	-6.30518	4.16941e-07	2.86713e-05	yes	PRKCQ	XP_004014222.1 PREDICTED: protein kinase C theta type isoform X1 [Ovis aries]	Organismal Systems;Environmental Information Processing;Cellular Processes	Cellular commiunity;Circulatory system;Endocrine system;Immune system;Signal transduction;Sensory system	ko04530//Tight junction;ko04270//Vascular smooth muscle contraction;ko04660//T cell receptor signaling pathway;ko04750//Inflammatory mediator regulation of TRP channels;ko04064//NF-kappa B signaling pathway;ko04920//Adipocytokine signaling pathway	K18052	GO:0005886//plasma membrane;GO:0044444//cytoplasmic part;GO:0044424//intracellular part;GO:0005622//intracellular;GO:0005737//cytoplasm;GO:0005623//cell;GO:0071944//cell periphery;GO:0044425//membrane part;GO:0016020//membrane;GO:0044459//plasma membrane part;GO:0044464//cell part	GO:0016773//phosphotransferase activity, alcohol group as acceptor;GO:1901363//heterocyclic compound binding;GO:0032550//purine ribonucleoside binding;GO:0043167//ion binding;GO:0036094//small molecule binding;GO:0001882//nucleoside binding;GO:0016740//transferase activity;GO:0005488//binding;GO:0016301//kinase activity;GO:0032549//ribonucleoside binding;GO:0097367//carbohydrate derivative bindin…	GO:0060255//regulation of macromolecule metabolic process;GO:0044267//cellular protein metabolic process;GO:1903037//regulation of leukocyte cell-cell adhesion;GO:0031325//positive regulation of cellular metabolic process;GO:0034110//regulation of homotypic cell-cell adhesion;GO:0006793//phosphorus metabolic process;GO:0007602//phototransduction;GO:0032502//developmental process;GO:0070486//leuko…
TCONS_00040879	608.507	0	12.1167	0.001	-13.5647	2.2385e-17	2.32331e-14	yes	PRKCQ	XP_004014222.1 PREDICTED: protein kinase C theta type isoform X1 [Ovis aries]	Cellular Processes;Environmental Information Processing;Organismal Systems	Immune system;Endocrine system;Cellular commiunity;Circulatory system;Sensory system;Signal transduction	ko04530//Tight junction;ko04270//Vascular smooth muscle contraction;ko04660//T cell receptor signaling pathway;ko04750//Inflammatory mediator regulation of TRP channels;ko04064//NF-kappa B signaling pathway;ko04920//Adipocytokine signaling pathway	K18052	GO:0005623//cell;GO:0071944//cell periphery;GO:0044459//plasma membrane part;GO:0044424//intracellular part;GO:0005737//cytoplasm;GO:0016020//membrane;GO:0005622//intracellular;GO:0044444//cytoplasmic part;GO:0044425//membrane part;GO:0005886//plasma membrane;GO:0044464//cell part	GO:0097367//carbohydrate derivative binding;GO:0016772//transferase activity, transferring phosphorus-containing groups;GO:0016301//kinase activity;GO:0043169//cation binding;GO:0032549//ribonucleoside binding;GO:0016740//transferase activity;GO:0019787//ubiquitin-like protein transferase activity;GO:0005488//binding;GO:0016773//phosphotransferase activity, alcohol group as acceptor;GO:0004674//p…	GO:0007602//phototransduction;GO:0032663//regulation of interleukin-2 production;GO:1903037//regulation of leukocyte cell-cell adhesion;GO:0009893//positive regulation of metabolic process;GO:0002682//regulation of immune system process;GO:0060548//negative regulation of cell death;GO:0007166//cell surface receptor signaling pathway;GO:0048812//neuron projection morphogenesis;GO:0044237//cellular…
TCONS_00040949	4.06667	212.65	0.0866667	2.67333	4.94702	0.00239891	0.0418207	yes	Pol	ELR50693.1 Spectrin beta chain, brain 2 [Bos mutus]	-	-	-	-	-	-	-
TCONS_00040974	58.3367	0	0.923333	0.001	-9.85071	0.000246113	0.00684775	yes	APBB1IP	XP_017912531.1 PREDICTED: amyloid beta A4 precursor protein-binding family B member 1-interacting protein [Capra hircus]	Organismal Systems;Environmental Information Processing	Immune system;Signal transduction	ko04015//Rap1 signaling pathway;ko04611//Platelet activation	K17704	-	-	-
TCONS_00040977	3430.3	135.823	55.45	1.69	-5.03609	1.05195e-11	2.37108e-09	yes	APBB1IP	XP_017912531.1 PREDICTED: amyloid beta A4 precursor protein-binding family B member 1-interacting protein [Capra hircus]	Environmental Information Processing;Organismal Systems	Immune system;Signal transduction	ko04015//Rap1 signaling pathway;ko04611//Platelet activation	K17704	-	-	-
TCONS_00040978	225.197	38.8633	3.65333	0.446667	-3.03194	0.0020066	0.0366567	yes	APBB1IP	XP_017912531.1 PREDICTED: amyloid beta A4 precursor protein-binding family B member 1-interacting protein [Capra hircus]	Environmental Information Processing;Organismal Systems	Signal transduction;Immune system	ko04015//Rap1 signaling pathway;ko04611//Platelet activation	K17704	-	-	-
TCONS_00041384	435.043	92.1533	5.69667	0.796667	-2.83807	0.000614925	0.0144592	yes	RASSF2	XP_004014386.1 PREDICTED: ras association domain-containing protein 2 [Ovis aries]	-	-	-	-	GO:0043227//membrane-bounded organelle;GO:0005623//cell;GO:0005622//intracellular;GO:0044464//cell part;GO:0043226//organelle;GO:0043229//intracellular organelle;GO:0043231//intracellular membrane-bounded organelle;GO:0044424//intracellular part	-	GO:0045637//regulation of myeloid cell differentiation;GO:1901222//regulation of NIK/NF-kappaB signaling;GO:0010646//regulation of cell communication;GO:0007167//enzyme linked receptor protein signaling pathway;GO:1902105//regulation of leukocyte differentiation;GO:0044699//single-organism process;GO:0009966//regulation of signal transduction;GO:0009987//cellular process;GO:0038167//epidermal gro…
TCONS_00041563	264.4	25.44	7.08	0.543333	-3.70384	0.000407059	0.0104019	yes	Lime1	XP_017913002.1 PREDICTED: lck-interacting transmembrane adapter 1 isoform X2 [Capra hircus]	-	-	-	-	-	-	-
TCONS_00041564	256.223	4.39	7.91667	0.106667	-6.21371	0.000124693	0.00394349	yes	Lime1	XP_017913001.1 PREDICTED: lck-interacting transmembrane adapter 1 isoform X1 [Capra hircus]	-	-	-	-	-	-	-
TCONS_00041646	139.81	2.12667	0.996667	0.0133333	-6.224	0.000135182	0.00420713	yes	ZNF831	XP_017913094.1 PREDICTED: zinc finger protein 831 [Capra hircus]	-	-	-	-	-	GO:0005488//binding;GO:0043167//ion binding;GO:0043169//cation binding	-
TCONS_00041772	876.837	220.497	21.9967	4.25333	-2.37062	0.000520351	0.0126762	yes	RBCK1	XP_017913154.1 PREDICTED: ranBP-type and C3HC4-type zinc finger-containing protein 1 isoform X2 [Capra hircus]	-	-	-	-	GO:0044424//intracellular part;GO:0005622//intracellular;GO:1902494//catalytic complex;GO:0000151//ubiquitin ligase complex;GO:0005623//cell;GO:0044464//cell part;GO:1990234//transferase complex;GO:0032991//macromolecular complex;GO:0043234//protein complex	GO:0032182//ubiquitin-like protein binding;GO:0046914//transition metal ion binding;GO:0043167//ion binding;GO:0003824//catalytic activity;GO:0019787//ubiquitin-like protein transferase activity;GO:0005488//binding;GO:0043169//cation binding;GO:0016740//transferase activity;GO:0046872//metal ion binding;GO:0005515//protein binding	GO:0044257//cellular protein catabolic process;GO:1903827//regulation of cellular protein localization;GO:0044238//primary metabolic process;GO:0080090//regulation of primary metabolic process;GO:0006508//proteolysis;GO:0009889//regulation of biosynthetic process;GO:0031325//positive regulation of cellular metabolic process;GO:0031323//regulation of cellular metabolic process;GO:0044248//cellular…
TCONS_00041827	619.463	393223	46.8333	20312.3	8.7606	9.05187e-10	1.18468e-07	yes	SPLUNC2B	XP_017912356.1 PREDICTED: short palate, lung and nasal epithelium carcinoma-associated protein 2B-like [Capra hircus]	-	-	-	-	-	-	-
TCONS_00042537	0	52.67	0.001	0.37	8.53138	0.000851129	0.0186659	yes	Rims2	XP_014962653.1 PREDICTED: regulating synaptic membrane exocytosis protein 2 isoform X73 [Ovis aries musimon]	Organismal Systems	Endocrine system	ko04911//Insulin secretion	K15297	-	GO:0019899//enzyme binding;GO:0043169//cation binding;GO:0031267//small GTPase binding;GO:0005515//protein binding;GO:0017016//Ras GTPase binding;GO:0051020//GTPase binding;GO:0005488//binding;GO:0043167//ion binding	GO:0099536//synaptic signaling;GO:0050794//regulation of cellular process;GO:0006810//transport;GO:0033036//macromolecule localization;GO:0032940//secretion by cell;GO:0023052//signaling;GO:0044700//single organism signaling;GO:0099531//presynaptic process involved in synaptic transmission;GO:0044763//single-organism cellular process;GO:0050896//response to stimulus;GO:0019932//second-messenger-m…
TCONS_00042720	2.08	106.36	0.0566667	1.71667	4.92097	0.00254616	0.0438353	yes	TCF24	XP_015329951.1 PREDICTED: transcription factor 24 [Bos taurus]	-	-	-	-	GO:0043231//intracellular membrane-bounded organelle;GO:0043227//membrane-bounded organelle;GO:0043229//intracellular organelle;GO:0005623//cell;GO:0044424//intracellular part;GO:0044464//cell part;GO:0005622//intracellular;GO:0043226//organelle	GO:0005488//binding;GO:0005515//protein binding	GO:0050789//regulation of biological process;GO:0043170//macromolecule metabolic process;GO:0009059//macromolecule biosynthetic process;GO:0044237//cellular metabolic process;GO:0019222//regulation of metabolic process;GO:0034645//cellular macromolecule biosynthetic process;GO:1901576//organic substance biosynthetic process;GO:0071704//organic substance metabolic process;GO:0065007//biological re…
TCONS_00042732	192.607	7.00667	1.52667	0.04	-5.25424	2.94293e-06	0.000158051	yes	-	XP_011981301.1 PREDICTED: AP-3 complex subunit mu-2 isoform X2 [Ovis aries musimon]	Genetic Information Processing	Replication and repair	ko03420//Nucleotide excision repair	K10838	GO:0005623//cell;GO:0005737//cytoplasm;GO:0044424//intracellular part;GO:0005622//intracellular;GO:0044444//cytoplasmic part;GO:0044464//cell part	GO:0016647//oxidoreductase activity, acting on the CH-NH group of donors, oxygen as acceptor;GO:0016491//oxidoreductase activity;GO:0016645//oxidoreductase activity, acting on the CH-NH group of donors;GO:0003824//catalytic activity;GO:0005488//binding	GO:0044106//cellular amine metabolic process;GO:0044237//cellular metabolic process;GO:0051649//establishment of localization in cell;GO:0009058//biosynthetic process;GO:0006807//nitrogen compound metabolic process;GO:0008152//metabolic process;GO:0009987//cellular process;GO:0034641//cellular nitrogen compound metabolic process;GO:0006576//cellular biogenic amine metabolic process;GO:0071704//or…
TCONS_00042798	253.837	31.66	3.02	0.263333	-3.51959	0.000221229	0.00626473	yes	TOX	XP_005215499.1 PREDICTED: thymocyte selection-associated high mobility group box protein TOX isoform X1 [Bos taurus]	-	-	-	-	-	-	-
TCONS_00042803	900.09	284.51	18.1467	4.37	-2.054	0.00279774	0.0470283	yes	NSMAF	XP_017913970.1 PREDICTED: protein FAN isoform X2 [Capra hircus]	Environmental Information Processing	Signal transduction	ko04071//Sphingolipid signaling pathway	K18953	-	-	-
TCONS_00042887	46.4967	0	2.2	0.001	-11.1033	0.00165903	0.0314266	yes	CFC1	XP_006066002.1 PREDICTED: cryptic protein-like [Bubalus bubalis]	-	-	-	-	-	-	GO:0065007//biological regulation;GO:0044763//single-organism cellular process;GO:0032502//developmental process;GO:0044707//single-multicellular organism process;GO:0048513//animal organ development;GO:0072358//cardiovascular system development;GO:0050794//regulation of cellular process;GO:0009887//organ morphogenesis;GO:0044700//single organism signaling;GO:0072359//circulatory system developme…
TCONS_00043749	0	60.6867	0.001	0.21	7.71425	0.000712311	0.0161945	yes	ZFHX4	XP_017913879.1 PREDICTED: zinc finger homeobox protein 4 isoform X3 [Capra hircus]	-	-	-	-	GO:0043231//intracellular membrane-bounded organelle;GO:0043227//membrane-bounded organelle;GO:0044424//intracellular part;GO:0043229//intracellular organelle;GO:0044464//cell part;GO:0043226//organelle;GO:0005623//cell;GO:0005622//intracellular	GO:0046872//metal ion binding;GO:0003677//DNA binding;GO:0043167//ion binding;GO:0003676//nucleic acid binding;GO:1901363//heterocyclic compound binding;GO:0097159//organic cyclic compound binding;GO:0043169//cation binding;GO:0005488//binding;GO:0046914//transition metal ion binding	GO:0050789//regulation of biological process;GO:0065007//biological regulation;GO:0010468//regulation of gene expression;GO:0019222//regulation of metabolic process;GO:0060255//regulation of macromolecule metabolic process
TCONS_00044023	386.767	80.87	25.02	3.45	-2.85841	0.000174635	0.00516146	yes	FAM49B	KYO45186.1 hypothetical protein Y1Q_0014652 [Alligator mississippiensis]	-	-	-	-	GO:0031988//membrane-bounded vesicle;GO:0005623//cell;GO:0044464//cell part;GO:0031982//vesicle;GO:0043227//membrane-bounded organelle;GO:0042995//cell projection;GO:0043226//organelle	-	-
TCONS_00044042	561.9	6.09667	11.6733	0.09	-7.01908	3.75511e-08	3.35173e-06	yes	SLA	XP_013824590.1 PREDICTED: src-like-adapter isoform X2 [Capra hircus]	-	-	-	-	-	-	-
TCONS_00044212	90.84	2.43	1.55333	0.03	-5.69426	0.00215492	0.0387094	yes	RECQL4	XP_017914246.1 PREDICTED: ATP-dependent DNA helicase Q4 [Capra hircus]	-	-	-	-	-	GO:0017111//nucleoside-triphosphatase activity;GO:1901363//heterocyclic compound binding;GO:0001882//nucleoside binding;GO:0005488//binding;GO:0097159//organic cyclic compound binding;GO:0036094//small molecule binding;GO:0032549//ribonucleoside binding;GO:0016818//hydrolase activity, acting on acid anhydrides, in phosphorus-containing anhydrides;GO:0032550//purine ribonucleoside binding;GO:00168…	GO:0033043//regulation of organelle organization;GO:0043170//macromolecule metabolic process;GO:0044238//primary metabolic process;GO:0048856//anatomical structure development;GO:0006139//nucleobase-containing compound metabolic process;GO:0050789//regulation of biological process;GO:0009653//anatomical structure morphogenesis;GO:0071704//organic substance metabolic process;GO:0044767//single-org…
TCONS_00044367	234.44	0	17.7967	0.001	-14.1193	1.4732e-06	8.75468e-05	yes	Prg3	XP_017914430.1 PREDICTED: proteoglycan 3-like [Capra hircus]	-	-	-	-	-	-	-
TCONS_00044368	2013.19	0	192.233	0.001	-17.5525	4.60282e-11	8.7786e-09	yes	Prg3	XP_017914430.1 PREDICTED: proteoglycan 3-like [Capra hircus]	-	-	-	-	-	-	-
TCONS_00044370	527.447	0	53.02	0.001	-15.6942	1.78374e-08	1.71936e-06	yes	Prg3	XP_005957603.1 PREDICTED: proteoglycan 3-like [Pantholops hodgsonii]	-	-	-	-	-	-	-
TCONS_00044445	82.6433	0	1.29	0.001	-10.3332	0.00069258	0.0158509	yes	CELF1	XP_006057437.1 PREDICTED: CUGBP Elav-like family member 1 isoform X7 [Bubalus bubalis]	-	-	-	-	-	-	-
TCONS_00044666	2654.58	0.543333	40.3333	0.00666667	-12.5627	4.50108e-27	6.69596e-23	yes	RAG2	XP_005690152.1 PREDICTED: V(D)J recombination-activating protein 2 [Capra hircus]	Environmental Information Processing	Signal transduction	ko04068//FoxO signaling pathway	K10988	GO:0043227//membrane-bounded organelle;GO:0043229//intracellular organelle;GO:0043231//intracellular membrane-bounded organelle;GO:0043226//organelle;GO:0044464//cell part;GO:0044424//intracellular part;GO:0005622//intracellular;GO:0005623//cell	GO:1902936//phosphatidylinositol bisphosphate binding;GO:0016787//hydrolase activity;GO:0016788//hydrolase activity, acting on ester bonds;GO:0004518//nuclease activity;GO:1901363//heterocyclic compound binding;GO:0005543//phospholipid binding;GO:0043168//anion binding;GO:1901981//phosphatidylinositol phosphate binding;GO:0005488//binding;GO:0046872//metal ion binding;GO:0035091//phosphatidylinos…	GO:0032501//multicellular organismal process;GO:0007159//leukocyte cell-cell adhesion;GO:0034109//homotypic cell-cell adhesion;GO:0048731//system development;GO:0044260//cellular macromolecule metabolic process;GO:0043170//macromolecule metabolic process;GO:1901360//organic cyclic compound metabolic process;GO:0071704//organic substance metabolic process;GO:0002521//leukocyte differentiation;GO:0…
TCONS_00044916	2445.71	467.123	21.9467	3.32667	-2.72185	0.00010645	0.00346267	yes	NUMA1	XP_017914907.1 PREDICTED: nuclear mitotic apparatus protein 1 isoform X4 [Capra hircus]	-	-	-	-	GO:0043226//organelle;GO:0005623//cell;GO:0043227//membrane-bounded organelle;GO:0044446//intracellular organelle part;GO:0005856//cytoskeleton;GO:0044422//organelle part;GO:0005622//intracellular;GO:0043232//intracellular non-membrane-bounded organelle;GO:0016020//membrane;GO:0044464//cell part;GO:0044424//intracellular part;GO:0043231//intracellular membrane-bounded organelle;GO:0005819//spindl…	-	GO:0060429//epithelium development;GO:0032502//developmental process;GO:0048856//anatomical structure development;GO:0009888//tissue development;GO:0009987//cellular process;GO:0044767//single-organism developmental process;GO:0030154//cell differentiation;GO:0044699//single-organism process;GO:0048869//cellular developmental process;GO:0044763//single-organism cellular process;GO:0030855//epithe…
TCONS_00045006	557.74	158.873	8.31667	1.55333	-2.42064	0.000613714	0.0144383	yes	TRIM5	XP_013832381.2 PREDICTED: tripartite motif-containing protein 5 isoform X1 [Capra hircus]	-	-	-	-	-	-	-
TCONS_00045114	0	207.493	0.001	1.95	10.9293	4.49284e-05	0.00168355	yes	IPO7	XP_017915013.1 PREDICTED: importin-7 [Capra hircus]	-	-	-	-	GO:0044428//nuclear part;GO:0043229//intracellular organelle;GO:0044424//intracellular part;GO:0032991//macromolecular complex;GO:0046930//pore complex;GO:0043226//organelle;GO:0016020//membrane;GO:0044464//cell part;GO:0070013//intracellular organelle lumen;GO:0031981//nuclear lumen;GO:0031974//membrane-enclosed lumen;GO:0044422//organelle part;GO:0016021//integral component of membrane;GO:00444…	GO:0017016//Ras GTPase binding;GO:0019899//enzyme binding;GO:0098772//molecular function regulator;GO:0051020//GTPase binding;GO:0060589//nucleoside-triphosphatase regulator activity;GO:0031267//small GTPase binding;GO:0005515//protein binding;GO:0030234//enzyme regulator activity;GO:0005488//binding	GO:0045184//establishment of protein localization;GO:0051704//multi-organism process;GO:0050794//regulation of cellular process;GO:0019222//regulation of metabolic process;GO:0015031//protein transport;GO:0071702//organic substance transport;GO:0051234//establishment of localization;GO:0033036//macromolecule localization;GO:0008104//protein localization;GO:0050896//response to stimulus;GO:0051179…
TCONS_00045306	85.1633	0	0.783333	0.001	-9.61348	0.000906715	0.0196818	yes	BCL9L	XP_011973163.1 PREDICTED: B-cell CLL/lymphoma 9-like protein isoform X3 [Ovis aries musimon]	-	-	-	-	-	GO:0005488//binding;GO:0005515//protein binding	GO:0007519//skeletal muscle tissue development;GO:1903506//regulation of nucleic acid-templated transcription;GO:0023051//regulation of signaling;GO:0044700//single organism signaling;GO:0007166//cell surface receptor signaling pathway;GO:0009966//regulation of signal transduction;GO:0045595//regulation of cell differentiation;GO:0080090//regulation of primary metabolic process;GO:0019222//regula…
TCONS_00045376	0	78.4733	0.001	0.97	9.92184	0.00274781	0.0464515	yes	CADM1	XP_005215904.1 PREDICTED: cell adhesion molecule 1 isoform X4 [Bos taurus]	Environmental Information Processing	Signaling molecules and interaction	ko04514//Cell adhesion molecules (CAMs)	K06781	GO:0043005//neuron projection;GO:0031224//intrinsic component of membrane;GO:0042995//cell projection;GO:0043229//intracellular organelle;GO:0016023//cytoplasmic, membrane-bounded vesicle;GO:0097458//neuron part;GO:0044425//membrane part;GO:0044424//intracellular part;GO:0030054//cell junction;GO:0043226//organelle;GO:0016020//membrane;GO:0031410//cytoplasmic vesicle;GO:0044444//cytoplasmic part;…	GO:0005488//binding;GO:0019904//protein domain specific binding;GO:0005515//protein binding;GO:0046983//protein dimerization activity	GO:0031349//positive regulation of defense response;GO:0007275//multicellular organism development;GO:0002715//regulation of natural killer cell mediated immunity;GO:0002682//regulation of immune system process;GO:0001819//positive regulation of cytokine production;GO:0048518//positive regulation of biological process;GO:0051239//regulation of multicellular organismal process;GO:0002705//positive…
TCONS_00045402	77.5633	1523.97	7.84333	97.82	3.64059	1.35138e-05	0.000601303	yes	CRYAB	XP_010984284.1 PREDICTED: alpha-crystallin B chain [Camelus dromedarius]	Genetic Information Processing;Organismal Systems	Aging;Folding, sorting and degradation	ko04141//Protein processing in endoplasmic reticulum;ko04213//Longevity regulating pathway - multiple species	K09542	GO:0030017//sarcomere;GO:0044422//organelle part;GO:0044424//intracellular part;GO:0031988//membrane-bounded vesicle;GO:0005623//cell;GO:0043292//contractile fiber;GO:0043228//non-membrane-bounded organelle;GO:0044464//cell part;GO:0031982//vesicle;GO:0043227//membrane-bounded organelle;GO:0044446//intracellular organelle part;GO:0043232//intracellular non-membrane-bounded organelle;GO:0005622//i…	GO:0043167//ion binding;GO:0046983//protein dimerization activity;GO:0043169//cation binding;GO:0008092//cytoskeletal protein binding;GO:0005198//structural molecule activity;GO:0015631//tubulin binding;GO:0005488//binding;GO:0005515//protein binding	GO:0032879//regulation of localization;GO:0060548//negative regulation of cell death;GO:0044700//single organism signaling;GO:0034622//cellular macromolecular complex assembly;GO:0007275//multicellular organism development;GO:0006979//response to oxidative stress;GO:0006793//phosphorus metabolic process;GO:0006996//organelle organization;GO:0000165//MAPK cascade;GO:0050794//regulation of cellular…
TCONS_00045457	125.19	0	1.8	0.001	-10.8138	0.000111838	0.00361684	yes	NPAT	XP_017915327.1 PREDICTED: protein NPAT isoform X2 [Capra hircus]	-	-	-	-	-	-	-
TCONS_00045589	142.933	0.333333	6.63	0.01	-9.37287	0.000236112	0.00661899	yes	MS4A3	XP_013825430.2 PREDICTED: membrane-spanning 4-domains subfamily A member 3 [Capra hircus]	-	-	-	-	-	-	-
TCONS_00045775	794.547	230.133	8.28333	1.51	-2.45566	0.00221255	0.0393825	yes	PTPRJ	XP_013825342.2 PREDICTED: receptor-type tyrosine-protein phosphatase eta [Capra hircus]	Cellular Processes	Cellular commiunity	ko04520//Adherens junction	K05698	GO:0030054//cell junction;GO:0044459//plasma membrane part;GO:0042995//cell projection;GO:0071944//cell periphery;GO:0098805//whole membrane;GO:0031988//membrane-bounded vesicle;GO:0031982//vesicle;GO:0005623//cell;GO:0098589//membrane region;GO:0044464//cell part;GO:0098590//plasma membrane region;GO:0044425//membrane part;GO:0043227//membrane-bounded organelle;GO:0031253//cell projection membra…	GO:0016791//phosphatase activity;GO:0070851//growth factor receptor binding;GO:0005102//receptor binding;GO:0019901//protein kinase binding;GO:0016788//hydrolase activity, acting on ester bonds;GO:0019900//kinase binding;GO:0016787//hydrolase activity;GO:0004721//phosphoprotein phosphatase activity;GO:0019899//enzyme binding;GO:0005515//protein binding;GO:0005488//binding;GO:0003824//catalytic ac…	GO:0002690//positive regulation of leukocyte chemotaxis;GO:0008283//cell proliferation;GO:0003013//circulatory system process;GO:0002688//regulation of leukocyte chemotaxis;GO:0030154//cell differentiation;GO:0044763//single-organism cellular process;GO:1903034//regulation of response to wounding;GO:0001954//positive regulation of cell-matrix adhesion;GO:0048519//negative regulation of biological…
TCONS_00045878	1437.7	301.243	27.45	4.84667	-2.50174	0.00300274	0.0495596	yes	SLC35C1	XP_017914683.1 PREDICTED: GDP-fucose transporter 1 isoform X1 [Capra hircus]	-	-	-	-	GO:0005622//intracellular;GO:0044464//cell part;GO:0044425//membrane part;GO:0043231//intracellular membrane-bounded organelle;GO:0016020//membrane;GO:0005623//cell;GO:0043229//intracellular organelle;GO:0031224//intrinsic component of membrane;GO:0044424//intracellular part;GO:0043226//organelle;GO:0043227//membrane-bounded organelle	-	GO:0051234//establishment of localization;GO:0023051//regulation of signaling;GO:0030258//lipid modification;GO:0050789//regulation of biological process;GO:0048583//regulation of response to stimulus;GO:0009966//regulation of signal transduction;GO:0044765//single-organism transport;GO:0044255//cellular lipid metabolic process;GO:0065007//biological regulation;GO:0050794//regulation of cellular …
TCONS_00045880	899.837	46.8367	8.67	0.363333	-4.57667	3.05301e-07	2.18354e-05	yes	SLC35C1	XP_011951696.1 PREDICTED: GDP-fucose transporter 1 isoform X2 [Ovis aries]	-	-	-	-	GO:0044425//membrane part;GO:0043231//intracellular membrane-bounded organelle;GO:0005622//intracellular;GO:0031224//intrinsic component of membrane;GO:0005623//cell;GO:0043229//intracellular organelle;GO:0043226//organelle;GO:0044464//cell part;GO:0016020//membrane;GO:0044424//intracellular part;GO:0043227//membrane-bounded organelle	-	GO:0044238//primary metabolic process;GO:0008593//regulation of Notch signaling pathway;GO:0006629//lipid metabolic process;GO:0050794//regulation of cellular process;GO:0050789//regulation of biological process;GO:0009987//cellular process;GO:0051179//localization;GO:0010646//regulation of cell communication;GO:0023051//regulation of signaling;GO:0071704//organic substance metabolic process;GO:0…
TCONS_00045973	27147.2	1.13	184.86	0.00333333	-15.7591	7.79173e-31	3.47737e-26	yes	RAG1	XP_005690149.2 PREDICTED: V(D)J recombination-activating protein 1 [Capra hircus]	Environmental Information Processing	Signal transduction	ko04068//FoxO signaling pathway	K10628	GO:0005623//cell;GO:0043226//organelle;GO:0043229//intracellular organelle;GO:0044424//intracellular part;GO:0044464//cell part;GO:0005622//intracellular;GO:0043231//intracellular membrane-bounded organelle;GO:0043227//membrane-bounded organelle	GO:0016788//hydrolase activity, acting on ester bonds;GO:0003676//nucleic acid binding;GO:0005515//protein binding;GO:0016879//ligase activity, forming carbon-nitrogen bonds;GO:0046872//metal ion binding;GO:0019787//ubiquitin-like protein transferase activity;GO:0016787//hydrolase activity;GO:0046983//protein dimerization activity;GO:0043169//cation binding;GO:1901363//heterocyclic compound bindi…	GO:0006139//nucleobase-containing compound metabolic process;GO:0022610//biological adhesion;GO:0006259//DNA metabolic process;GO:0070232//regulation of T cell apoptotic process;GO:0030154//cell differentiation;GO:0065007//biological regulation;GO:0043067//regulation of programmed cell death;GO:0070486//leukocyte aggregation;GO:0044237//cellular metabolic process;GO:0051249//regulation of lymphoc…
TCONS_00046052	460.863	111.63	3.42333	0.566667	-2.59483	0.000243227	0.00678013	yes	TCP11L1	XP_017914761.1 PREDICTED: T-complex protein 11-like protein 1 isoform X1 [Capra hircus]	-	-	-	-	-	-	-
TCONS_00046157	0	216.45	0.001	2.33333	11.1882	9.35182e-08	7.46623e-06	yes	UVRAG	XP_017914818.1 PREDICTED: UV radiation resistance-associated gene protein isoform X1 [Capra hircus]	-	-	-	-	-	-	-
TCONS_00046264	45.5	1.10333	3.07667	0.05	-5.9433	0.00289361	0.0481862	yes	ART5	XP_005689925.2 PREDICTED: ecto-ADP-ribosyltransferase 5 [Capra hircus]	-	-	-	-	-	GO:0016740//transferase activity;GO:0003824//catalytic activity	GO:0044710//single-organism metabolic process;GO:0071704//organic substance metabolic process;GO:0044249//cellular biosynthetic process;GO:0009058//biosynthetic process;GO:0044763//single-organism cellular process;GO:0044267//cellular protein metabolic process;GO:0006464//cellular protein modification process;GO:0005975//carbohydrate metabolic process;GO:0009101//glycoprotein biosynthetic process…
TCONS_00046642	726.437	50.33	8.57333	0.41	-4.38616	3.02788e-09	3.48277e-07	yes	UBASH3B	NP_001193057.1 ubiquitin-associated and SH3 domain-containing protein B [Bos taurus]	-	-	-	-	-	-	GO:0051049//regulation of transport;GO:0032101//regulation of response to external stimulus;GO:1900046//regulation of hemostasis;GO:0051241//negative regulation of multicellular organismal process;GO:0032844//regulation of homeostatic process;GO:0044267//cellular protein metabolic process;GO:0061045//negative regulation of wound healing;GO:0009987//cellular process;GO:1900047//negative regulation…
TCONS_00046724	59.8367	0	0.69	0.001	-9.43045	0.00258837	0.0443952	yes	Phldb1	XP_011973146.1 PREDICTED: pleckstrin homology-like domain family B member 1 isoform X15 [Ovis aries musimon]	-	-	-	-	-	-	-
TCONS_00046749	702.227	8.67	58.3567	0.503333	-6.85724	2.35037e-15	1.41048e-12	yes	CD3G	XP_005977124.1 PREDICTED: T-cell surface glycoprotein CD3 gamma chain [Pantholops hodgsonii]	Organismal Systems	Immune system	ko04660//T cell receptor signaling pathway;ko04640//Hematopoietic cell lineage	K06452	GO:0071944//cell periphery;GO:0044464//cell part;GO:0005623//cell;GO:0044425//membrane part;GO:0044459//plasma membrane part;GO:0031224//intrinsic component of membrane;GO:0016020//membrane;GO:0042101//T cell receptor complex;GO:0043235//receptor complex;GO:0098797//plasma membrane protein complex;GO:0043234//protein complex;GO:0098796//membrane protein complex;GO:0005886//plasma membrane;GO:0098…	GO:0005488//binding;GO:0046983//protein dimerization activity;GO:0060089//molecular transducer activity;GO:0004872//receptor activity;GO:0004871//signal transducer activity;GO:0005515//protein binding;GO:0038023//signaling receptor activity	GO:0042981//regulation of apoptotic process;GO:0023052//signaling;GO:0007165//signal transduction;GO:0009987//cellular process;GO:0051179//localization;GO:0010941//regulation of cell death;GO:0051716//cellular response to stimulus;GO:0033036//macromolecule localization;GO:0065007//biological regulation;GO:0050794//regulation of cellular process;GO:0008104//protein localization;GO:0044700//single …
TCONS_00046762	336.12	30.1133	4.07667	0.283333	-3.84682	0.00107515	0.0225061	yes	Cep164	XP_013824922.2 PREDICTED: centrosomal protein of 164 kDa isoform X2 [Capra hircus]	-	-	-	-	GO:0043234//protein complex;GO:0044446//intracellular organelle part;GO:0043232//intracellular non-membrane-bounded organelle;GO:0044430//cytoskeletal part;GO:0005856//cytoskeleton;GO:0005622//intracellular;GO:0005815//microtubule organizing center;GO:0042995//cell projection;GO:0043226//organelle;GO:0044424//intracellular part;GO:0032991//macromolecular complex;GO:0015630//microtubule cytoskelet…	-	GO:0044699//single-organism process;GO:0022607//cellular component assembly;GO:0048856//anatomical structure development;GO:0032989//cellular component morphogenesis;GO:0009987//cellular process;GO:0010927//cellular component assembly involved in morphogenesis;GO:0044767//single-organism developmental process;GO:0044085//cellular component biogenesis;GO:0044763//single-organism cellular process;G…
TCONS_00046890	62.1033	0	0.61	0.001	-9.25267	0.00138891	0.0274272	yes	ZC3H12C	XP_017915307.1 PREDICTED: probable ribonuclease ZC3H12C isoform X1 [Capra hircus]	-	-	-	-	-	-	-
TCONS_00047066	222.643	35.7433	8.44	1.03333	-3.02994	0.00140096	0.0275677	yes	ATP2B4	XP_017915488.1 PREDICTED: plasma membrane calcium-transporting ATPase 4-like [Capra hircus]	Environmental Information Processing;Organismal Systems	Circulatory system;Digestive system;Signal transduction	ko04024//cAMP signaling pathway;ko04020//Calcium signaling pathway;ko04022//cGMP - PKG signaling pathway;ko04261//Adrenergic signaling in cardiomyocytes;ko04970//Salivary secretion;ko04972//Pancreatic secretion	K05850	GO:0043232//intracellular non-membrane-bounded organelle;GO:0044424//intracellular part;GO:0043228//non-membrane-bounded organelle;GO:0030017//sarcomere;GO:0044464//cell part;GO:0044444//cytoplasmic part;GO:0005886//plasma membrane;GO:0044422//organelle part;GO:0043292//contractile fiber;GO:0043229//intracellular organelle;GO:0005737//cytoplasm;GO:0005623//cell;GO:0030016//myofibril;GO:0031224//i…	GO:0097367//carbohydrate derivative binding;GO:0001883//purine nucleoside binding;GO:0001882//nucleoside binding;GO:0004857//enzyme inhibitor activity;GO:0019902//phosphatase binding;GO:0003824//catalytic activity;GO:0097159//organic cyclic compound binding;GO:0032549//ribonucleoside binding;GO:0005515//protein binding;GO:0019903//protein phosphatase binding;GO:0043169//cation binding;GO:1901363/…	GO:0032768//regulation of monooxygenase activity;GO:0031329//regulation of cellular catabolic process;GO:0051716//cellular response to stimulus;GO:0042325//regulation of phosphorylation;GO:0042327//positive regulation of phosphorylation;GO:1901700//response to oxygen-containing compound;GO:0031327//negative regulation of cellular biosynthetic process;GO:1903522//regulation of blood circulation;GO…
TCONS_00047072	60.2867	1.54333	1.48333	0.0266667	-5.79766	0.00105397	0.0222085	yes	LAX1	XP_005959676.1 PREDICTED: LOW QUALITY PROTEIN: lymphocyte transmembrane adapter 1 [Pantholops hodgsonii]	-	-	-	-	GO:0044425//membrane part;GO:0044424//intracellular part;GO:0043226//organelle;GO:0031224//intrinsic component of membrane;GO:0005623//cell;GO:0043231//intracellular membrane-bounded organelle;GO:0043227//membrane-bounded organelle;GO:0016020//membrane;GO:0043229//intracellular organelle;GO:0005622//intracellular;GO:0044464//cell part	GO:0019900//kinase binding;GO:0005515//protein binding;GO:0019899//enzyme binding;GO:0005488//binding;GO:0019904//protein domain specific binding	GO:0050794//regulation of cellular process;GO:0022408//negative regulation of cell-cell adhesion;GO:0008104//protein localization;GO:0002684//positive regulation of immune system process;GO:0045321//leukocyte activation;GO:0015031//protein transport;GO:0044700//single organism signaling;GO:0002764//immune response-regulating signaling pathway;GO:0002757//immune response-activating signal transduc…
TCONS_00047138	1048.9	7.88667	8.48667	0.0566667	-7.22655	3.2933e-09	3.75899e-07	yes	CNTN2	XP_017915528.1 PREDICTED: contactin-2 isoform X2 [Capra hircus]	Environmental Information Processing	Signaling molecules and interaction	ko04514//Cell adhesion molecules (CAMs)	K06760	GO:0043005//neuron projection;GO:0031224//intrinsic component of membrane;GO:0034702//ion channel complex;GO:0044464//cell part;GO:0044463//cell projection part;GO:0034705//potassium channel complex;GO:0033267//axon part;GO:0016020//membrane;GO:0044297//cell body;GO:0005623//cell;GO:0034703//cation channel complex;GO:0032991//macromolecular complex;GO:1902495//transmembrane transporter complex;GO…	GO:0005488//binding;GO:0005515//protein binding	GO:0016477//cell migration;GO:0044767//single-organism developmental process;GO:0051246//regulation of protein metabolic process;GO:0009967//positive regulation of signal transduction;GO:0048518//positive regulation of biological process;GO:0048522//positive regulation of cellular process;GO:0007611//learning or memory;GO:0048583//regulation of response to stimulus;GO:0048519//negative regulation…
TCONS_00047484	93.7133	3.93	1.1	0.0333333	-5.04439	0.00171676	0.0323144	yes	-	XP_013825535.1 PREDICTED: uncharacterized protein LOC102188068 [Capra hircus]	-	-	-	-	-	-	-
TCONS_00047939	134.887	0.503333	10.0567	0.03	-8.38897	2.46636e-06	0.000135254	yes	TNFRSF18	XP_017916041.1 PREDICTED: tumor necrosis factor receptor superfamily member 18 isoform X1 [Capra hircus]	Environmental Information Processing	Signaling molecules and interaction	ko04060//Cytokine-cytokine receptor interaction	K05154	GO:0071944//cell periphery;GO:0044464//cell part;GO:0005886//plasma membrane;GO:0044459//plasma membrane part;GO:0016020//membrane;GO:0044425//membrane part;GO:0005623//cell	-	-
TCONS_00048025	965.157	363.16	4.03667	1.01333	-1.99406	0.00146198	0.0285174	yes	ZBTB37	XP_015347283.1 PREDICTED: zinc finger and BTB domain-containing protein 37 [Marmota marmota marmota]	-	-	-	-	GO:0044424//intracellular part;GO:0043227//membrane-bounded organelle;GO:0043229//intracellular organelle;GO:0043226//organelle;GO:0044464//cell part;GO:0005623//cell;GO:0043231//intracellular membrane-bounded organelle;GO:0005622//intracellular	GO:0043167//ion binding;GO:0043169//cation binding;GO:0005488//binding	-
TCONS_00048187	150.44	0	1.07	0.001	-10.0634	0.00142079	0.0278986	yes	PTPN14	XP_017916222.1 PREDICTED: tyrosine-protein phosphatase non-receptor type 14 [Capra hircus]	-	-	-	-	GO:0044464//cell part;GO:0043231//intracellular membrane-bounded organelle;GO:0043227//membrane-bounded organelle;GO:0043226//organelle;GO:0043229//intracellular organelle;GO:0043228//non-membrane-bounded organelle;GO:0043232//intracellular non-membrane-bounded organelle;GO:0044424//intracellular part;GO:0005623//cell;GO:0005622//intracellular	GO:0016791//phosphatase activity;GO:0003824//catalytic activity;GO:0000989//transcription factor activity, transcription factor binding;GO:0016787//hydrolase activity;GO:0005488//binding;GO:0005515//protein binding;GO:0016788//hydrolase activity, acting on ester bonds;GO:0042578//phosphoric ester hydrolase activity;GO:0004721//phosphoprotein phosphatase activity;GO:0000988//transcription factor a…	GO:0044238//primary metabolic process;GO:0051252//regulation of RNA metabolic process;GO:0008283//cell proliferation;GO:2001141//regulation of RNA biosynthetic process;GO:0031323//regulation of cellular metabolic process;GO:0009889//regulation of biosynthetic process;GO:0008152//metabolic process;GO:0050794//regulation of cellular process;GO:0006470//protein dephosphorylation;GO:0044699//single-o…
TCONS_00048365	1535.2	428.323	9.08333	2.01333	-2.17364	0.00234948	0.0411519	yes	NAV1	XP_017916359.1 PREDICTED: neuron navigator 1 isoform X3 [Capra hircus]	-	-	-	-	GO:0043226//organelle;GO:0043228//non-membrane-bounded organelle;GO:0044464//cell part;GO:0043232//intracellular non-membrane-bounded organelle;GO:0044424//intracellular part;GO:0005622//intracellular;GO:0005623//cell;GO:0043229//intracellular organelle;GO:0015630//microtubule cytoskeleton;GO:0005856//cytoskeleton	GO:0005488//binding;GO:1901363//heterocyclic compound binding;GO:0032549//ribonucleoside binding;GO:0097159//organic cyclic compound binding;GO:0032550//purine ribonucleoside binding;GO:0001883//purine nucleoside binding;GO:0036094//small molecule binding;GO:0001882//nucleoside binding;GO:0097367//carbohydrate derivative binding	GO:0048869//cellular developmental process;GO:0048870//cell motility;GO:0007017//microtubule-based process;GO:0009987//cellular process;GO:0000226//microtubule cytoskeleton organization;GO:0016043//cellular component organization;GO:0071840//cellular component organization or biogenesis;GO:0044707//single-multicellular organism process;GO:0051674//localization of cell;GO:0044767//single-organism …
TCONS_00048839	62.3333	0	1.02	0.001	-9.99435	0.000119925	0.00381476	yes	LBR	XP_017915699.1 PREDICTED: lamin-B receptor [Capra hircus]	-	-	-	-	GO:0043227//membrane-bounded organelle;GO:0012505//endomembrane system;GO:0044464//cell part;GO:0044422//organelle part;GO:0005622//intracellular;GO:0005623//cell;GO:0044424//intracellular part;GO:0044425//membrane part;GO:0043226//organelle;GO:0043231//intracellular membrane-bounded organelle;GO:0031090//organelle membrane;GO:0043229//intracellular organelle;GO:0016020//membrane;GO:0031224//intr…	GO:1901363//heterocyclic compound binding;GO:0003676//nucleic acid binding;GO:0097159//organic cyclic compound binding;GO:0005488//binding;GO:0003824//catalytic activity;GO:0019904//protein domain specific binding;GO:0016491//oxidoreductase activity;GO:0005515//protein binding;GO:0003723//RNA binding;GO:0016627//oxidoreductase activity, acting on the CH-CH group of donors	GO:0008152//metabolic process;GO:0044699//single-organism process;GO:0044710//single-organism metabolic process
TCONS_00048886	0	83.67	0.001	1.25333	10.2916	0.00245294	0.0426127	yes	PARP1	XP_005690590.2 PREDICTED: poly [ADP-ribose] polymerase 1 [Capra hircus]	Genetic Information Processing	Replication and repair	ko03410//Base excision repair	K10798	-	-	-
TCONS_00048957	294.31	5.45	11.11	0.166667	-6.05875	5.36997e-05	0.0019516	yes	CCDC181	XP_005690674.1 PREDICTED: coiled-coil domain-containing protein 181 [Capra hircus]	-	-	-	-	-	-	-
TCONS_00049141	166.063	0	2.87333	0.001	-11.4885	3.05571e-08	2.78451e-06	yes	TMEM201	XP_017915873.1 PREDICTED: transmembrane protein 201 isoform X1 [Capra hircus]	-	-	-	-	GO:0044422//organelle part;GO:0031090//organelle membrane;GO:0044425//membrane part;GO:0043226//organelle;GO:0016020//membrane;GO:0043227//membrane-bounded organelle;GO:0031224//intrinsic component of membrane	GO:0005515//protein binding;GO:0008092//cytoskeletal protein binding;GO:0005488//binding;GO:0003779//actin binding	GO:0001667//ameboidal-type cell migration;GO:0040023//establishment of nucleus localization;GO:0009987//cellular process;GO:0051640//organelle localization;GO:0044699//single-organism process;GO:0016477//cell migration;GO:0048870//cell motility;GO:0051656//establishment of organelle localization;GO:0006928//movement of cell or subcellular component;GO:0040011//locomotion;GO:0051179//localization;…
TCONS_00049320	68.6633	0	0.876667	0.001	-9.77588	2.58692e-05	0.00104861	yes	PLEKHN1	XP_017916061.1 PREDICTED: pleckstrin homology domain-containing family N member 1 isoform X2 [Capra hircus]	-	-	-	-	-	-	-
TCONS_00049465	0	520.63	0.001	2.32667	11.184	3.4669e-06	0.000181903	yes	ABL2	XP_004013883.1 PREDICTED: Abelson tyrosine-protein kinase 2 isoform X1 [Ovis aries]	Environmental Information Processing	Signal transduction	ko04014//Ras signaling pathway;ko04012//ErbB signaling pathway	K08887	-	-	-
TCONS_00049707	954.127	6.29667	7.21	0.0366667	-7.61939	2.17791e-14	1.01468e-11	yes	ASPM	XP_012007292.1 PREDICTED: abnormal spindle-like microcephaly-associated protein homolog isoform X2 [Ovis aries musimon]	-	-	-	-	GO:0043226//organelle;GO:0044424//intracellular part;GO:0044446//intracellular organelle part;GO:0043231//intracellular membrane-bounded organelle;GO:0044430//cytoskeletal part;GO:0005622//intracellular;GO:0015630//microtubule cytoskeleton;GO:0005819//spindle;GO:0043228//non-membrane-bounded organelle;GO:0043227//membrane-bounded organelle;GO:0044422//organelle part;GO:0043232//intracellular non-…	GO:0005488//binding;GO:0005515//protein binding	GO:0055057//neuroblast division;GO:0051321//meiotic cell cycle;GO:0071822//protein complex subunit organization;GO:0048609//multicellular organismal reproductive process;GO:0022412//cellular process involved in reproduction in multicellular organism;GO:0044707//single-multicellular organism process;GO:0000280//nuclear division;GO:0051704//multi-organism process;GO:0030111//regulation of Wnt signa…
TCONS_00049868	103.98	0	2	0.001	-10.9658	2.21294e-06	0.000122838	yes	EIF4ENIF1	XP_017916421.1 PREDICTED: eukaryotic translation initiation factor 4E transporter isoform X2 [Capra hircus]	-	-	-	-	GO:0044424//intracellular part;GO:0005622//intracellular;GO:0005737//cytoplasm;GO:0043231//intracellular membrane-bounded organelle;GO:0043226//organelle;GO:0043227//membrane-bounded organelle;GO:0043229//intracellular organelle;GO:0044464//cell part;GO:0044444//cytoplasmic part;GO:0005623//cell	GO:0003723//RNA binding;GO:0097159//organic cyclic compound binding;GO:1901363//heterocyclic compound binding;GO:0003676//nucleic acid binding;GO:0005488//binding	GO:1901576//organic substance biosynthetic process;GO:0034641//cellular nitrogen compound metabolic process;GO:0006807//nitrogen compound metabolic process;GO:0034645//cellular macromolecule biosynthetic process;GO:0044238//primary metabolic process;GO:0044249//cellular biosynthetic process;GO:0008152//metabolic process;GO:0019538//protein metabolic process;GO:0006412//translation;GO:0009987//cel…
TCONS_00049944	288.387	0.0466667	8.17333	0.001	-12.9967	2.90951e-11	5.77105e-09	yes	THOC5	XP_017916507.1 PREDICTED: THO complex subunit 5 homolog isoform X5 [Capra hircus]	Genetic Information Processing	Translation	ko03013//RNA transport	K13174	GO:0043233//organelle lumen;GO:0000346//transcription export complex;GO:0005654//nucleoplasm;GO:0044428//nuclear part;GO:0016604//nuclear body;GO:0043226//organelle;GO:0043231//intracellular membrane-bounded organelle;GO:0005623//cell;GO:0031974//membrane-enclosed lumen;GO:0044451//nucleoplasm part;GO:0044422//organelle part;GO:0005634//nucleus;GO:0032991//macromolecular complex;GO:0043227//membr…	GO:0003723//RNA binding;GO:0005488//binding;GO:1901363//heterocyclic compound binding;GO:0097159//organic cyclic compound binding;GO:0044822//poly(A) RNA binding;GO:0003676//nucleic acid binding	GO:0046483//heterocycle metabolic process;GO:0009792//embryo development ending in birth or egg hatching;GO:0071840//cellular component organization or biogenesis;GO:0006725//cellular aromatic compound metabolic process;GO:0050657//nucleic acid transport;GO:1902578//single-organism localization;GO:0048856//anatomical structure development;GO:0048869//cellular developmental process;GO:0035162//emb…
TCONS_00050126	5544.76	1059.49	89.9	10.7867	-3.05907	0.00214808	0.038612	yes	OAS1	XP_017916651.1 PREDICTED: 2'-5'-oligoadenylate synthase 1 isoform X4 [Capra hircus]	-	-	-	-	-	GO:1901363//heterocyclic compound binding;GO:0003824//catalytic activity;GO:0016740//transferase activity;GO:0043167//ion binding;GO:0003723//RNA binding;GO:0005488//binding;GO:0097159//organic cyclic compound binding;GO:0003676//nucleic acid binding	GO:0044710//single-organism metabolic process;GO:0008152//metabolic process;GO:0051707//response to other organism;GO:0009987//cellular process;GO:0044238//primary metabolic process;GO:1901360//organic cyclic compound metabolic process;GO:0051704//multi-organism process;GO:0009605//response to external stimulus;GO:0071704//organic substance metabolic process;GO:0046483//heterocycle metabolic proc…
TCONS_00050307	2159.37	134.957	36.1533	1.82333	-4.30948	8.48948e-07	5.41253e-05	yes	BCL7A	XP_011965653.1 PREDICTED: B-cell CLL/lymphoma 7 protein family member A isoform X4 [Ovis aries musimon]	-	-	-	-	-	GO:0005488//binding	GO:0019219//regulation of nucleobase-containing compound metabolic process;GO:0060255//regulation of macromolecule metabolic process;GO:0019222//regulation of metabolic process;GO:0010556//regulation of macromolecule biosynthetic process;GO:2001141//regulation of RNA biosynthetic process;GO:0031323//regulation of cellular metabolic process;GO:2000112//regulation of cellular macromolecule biosynth…
TCONS_00050430	6692.07	1050.64	32.66	4.06	-3.00797	1.66186e-05	0.000717012	yes	EP400	XP_017916928.1 PREDICTED: E1A-binding protein p400 isoform X2 [Capra hircus]	-	-	-	-	GO:0044422//organelle part;GO:0043189//H4/H2A histone acetyltransferase complex;GO:0005623//cell;GO:0043226//organelle;GO:0044424//intracellular part;GO:0032991//macromolecular complex;GO:0043227//membrane-bounded organelle;GO:0044451//nucleoplasm part;GO:0000123//histone acetyltransferase complex;GO:0031981//nuclear lumen;GO:0005654//nucleoplasm;GO:0005634//nucleus;GO:1902562//H4 histone acetylt…	GO:0005488//binding;GO:1901363//heterocyclic compound binding;GO:0003676//nucleic acid binding;GO:0001882//nucleoside binding;GO:0032549//ribonucleoside binding;GO:0097367//carbohydrate derivative binding;GO:0036094//small molecule binding;GO:0001883//purine nucleoside binding;GO:0032550//purine ribonucleoside binding;GO:0097159//organic cyclic compound binding	GO:0006473//protein acetylation;GO:0071704//organic substance metabolic process;GO:0044237//cellular metabolic process;GO:0006325//chromatin organization;GO:0006996//organelle organization;GO:0044763//single-organism cellular process;GO:0036211//protein modification process;GO:0044699//single-organism process;GO:0006475//internal protein amino acid acetylation;GO:0043412//macromolecule modificati…
TCONS_00050441	40.37	0	1.10667	0.001	-10.112	0.000883463	0.019276	yes	NOC4L	XP_017916936.1 PREDICTED: nucleolar complex protein 4 homolog isoform X2 [Capra hircus]	-	-	-	-	-	-	-
TCONS_00050588	45.7967	0	0.896667	0.001	-9.80843	0.000537982	0.0130063	yes	PLK4	XP_013825986.2 PREDICTED: serine/threonine-protein kinase PLK4 isoform X1 [Capra hircus]	Environmental Information Processing	Signal transduction	ko04068//FoxO signaling pathway	K08863	GO:0044430//cytoskeletal part;GO:0044422//organelle part;GO:0015630//microtubule cytoskeleton;GO:0044424//intracellular part;GO:0043226//organelle;GO:0043232//intracellular non-membrane-bounded organelle;GO:0043228//non-membrane-bounded organelle;GO:0043229//intracellular organelle;GO:0005815//microtubule organizing center;GO:0044464//cell part;GO:0005856//cytoskeleton;GO:0044446//intracellular o…	GO:0032550//purine ribonucleoside binding;GO:0097159//organic cyclic compound binding;GO:0005515//protein binding;GO:0004672//protein kinase activity;GO:0016740//transferase activity;GO:0016772//transferase activity, transferring phosphorus-containing groups;GO:0003824//catalytic activity;GO:0032549//ribonucleoside binding;GO:0001882//nucleoside binding;GO:0036094//small molecule binding;GO:00167…	GO:0051130//positive regulation of cellular component organization;GO:0051128//regulation of cellular component organization;GO:0044238//primary metabolic process;GO:0022607//cellular component assembly;GO:0051495//positive regulation of cytoskeleton organization;GO:0006996//organelle organization;GO:0060706//cell differentiation involved in embryonic placenta development;GO:0006793//phosphorus m…
TCONS_00050803	905.477	197.567	13.2733	2.17333	-2.61055	7.49135e-05	0.00257521	yes	-	XP_017917109.1 PREDICTED: transmembrane protein 131-like [Capra hircus]	-	-	-	-	-	-	-
TCONS_00050804	48.7967	0	0.553333	0.001	-9.11201	0.000564091	0.0135203	yes	-	XP_017917109.1 PREDICTED: transmembrane protein 131-like [Capra hircus]	-	-	-	-	-	-	-
TCONS_00050903	12.3067	538.263	1.86	59.4033	4.99717	7.84233e-05	0.0026758	yes	-	XP_005959731.1 PREDICTED: uncharacterized protein LOC102337103 [Pantholops hodgsonii]	-	-	-	-	GO:0016020//membrane	GO:0005488//binding	GO:0044710//single-organism metabolic process;GO:0002684//positive regulation of immune system process;GO:0044238//primary metabolic process;GO:0007165//signal transduction;GO:0050778//positive regulation of immune response;GO:0002764//immune response-regulating signaling pathway;GO:0002429//immune response-activating cell surface receptor signaling pathway;GO:0007154//cell communication;GO:00230…
TCONS_00051068	239.64	0.743333	2.32333	0.00666667	-8.44501	3.01028e-07	2.15644e-05	yes	MYO18B	XP_017916558.1 PREDICTED: unconventional myosin-XVIIIb isoform X2 [Capra hircus]	-	-	-	-	GO:0005737//cytoplasm;GO:0005623//cell;GO:0030017//sarcomere;GO:0044424//intracellular part;GO:0044444//cytoplasmic part;GO:0044449//contractile fiber part;GO:0043292//contractile fiber;GO:0032991//macromolecular complex;GO:0043229//intracellular organelle;GO:0005622//intracellular;GO:0043226//organelle;GO:0043232//intracellular non-membrane-bounded organelle;GO:0031674//I band;GO:0015629//actin …	GO:0032550//purine ribonucleoside binding;GO:1901363//heterocyclic compound binding;GO:0001883//purine nucleoside binding;GO:0005488//binding;GO:0032549//ribonucleoside binding;GO:0001882//nucleoside binding;GO:0016462//pyrophosphatase activity;GO:0016787//hydrolase activity;GO:0016818//hydrolase activity, acting on acid anhydrides, in phosphorus-containing anhydrides;GO:0097159//organic cyclic c…	GO:0061061//muscle structure development;GO:0048747//muscle fiber development;GO:0042692//muscle cell differentiation;GO:0044707//single-multicellular organism process;GO:0055001//muscle cell development;GO:0009792//embryo development ending in birth or egg hatching;GO:0043009//chordate embryonic development;GO:0048468//cell development;GO:0051146//striated muscle cell differentiation;GO:0030154/…
TCONS_00051329	604.693	19.93	4.14	0.1	-5.37156	7.9957e-05	0.00271731	yes	NOS1	XP_017916710.1 PREDICTED: nitric oxide synthase, brain [Capra hircus]	Organismal Systems;Cellular Processes;Metabolism;Environmental Information Processing	Transport and catabolism;Digestive system;Amino acid metabolism;Signal transduction;Global and Overview;Nervous system;Environmental adaptation	ko01100//Metabolic pathways;ko04020//Calcium signaling pathway;ko04145//Phagosome;ko04713//Circadian entrainment;ko01110//Biosynthesis of secondary metabolites;ko04970//Salivary secretion;ko04730//Long-term depression;ko00330//Arginine and proline metabolism;ko00220//Arginine biosynthesis	K13240	GO:0043005//neuron projection;GO:0016020//membrane;GO:0005783//endoplasmic reticulum;GO:0005737//cytoplasm;GO:0043231//intracellular membrane-bounded organelle;GO:0005622//intracellular;GO:0005623//cell;GO:0044309//neuron spine;GO:0098589//membrane region;GO:0043226//organelle;GO:0044444//cytoplasmic part;GO:0071944//cell periphery;GO:0043227//membrane-bounded organelle;GO:0043228//non-membrane-b…	GO:0005515//protein binding;GO:0043169//cation binding;GO:0003824//catalytic activity;GO:0005488//binding;GO:0043167//ion binding	GO:0031323//regulation of cellular metabolic process;GO:0051130//positive regulation of cellular component organization;GO:2000112//regulation of cellular macromolecule biosynthetic process;GO:0008015//blood circulation;GO:0001505//regulation of neurotransmitter levels;GO:0031326//regulation of cellular biosynthetic process;GO:0033044//regulation of chromosome organization;GO:0051128//regulation …
TCONS_00051330	485.9	50.7333	3.1	0.236667	-3.71134	0.00253145	0.0436538	yes	NOS1	XP_017916710.1 PREDICTED: nitric oxide synthase, brain [Capra hircus]	Metabolism;Cellular Processes;Environmental Information Processing;Organismal Systems	Transport and catabolism;Digestive system;Amino acid metabolism;Signal transduction;Global and Overview;Nervous system;Environmental adaptation	ko01100//Metabolic pathways;ko04020//Calcium signaling pathway;ko04145//Phagosome;ko04713//Circadian entrainment;ko01110//Biosynthesis of secondary metabolites;ko04970//Salivary secretion;ko04730//Long-term depression;ko00330//Arginine and proline metabolism;ko00220//Arginine biosynthesis	K13240	GO:0044309//neuron spine;GO:0098589//membrane region;GO:0005737//cytoplasm;GO:0005623//cell;GO:0043228//non-membrane-bounded organelle;GO:0043231//intracellular membrane-bounded organelle;GO:0005886//plasma membrane;GO:0012505//endomembrane system;GO:0043232//intracellular non-membrane-bounded organelle;GO:0098805//whole membrane;GO:0043229//intracellular organelle;GO:0042995//cell projection;GO:…	GO:0043169//cation binding;GO:0043167//ion binding;GO:0005488//binding;GO:0003824//catalytic activity;GO:0005515//protein binding	GO:0010648//negative regulation of cell communication;GO:0019538//protein metabolic process;GO:0044699//single-organism process;GO:0031401//positive regulation of protein modification process;GO:0008152//metabolic process;GO:0010556//regulation of macromolecule biosynthetic process;GO:0010959//regulation of metal ion transport;GO:0002026//regulation of the force of heart contraction;GO:0015672//m…
TCONS_00051331	129.883	3649.27	1.01333	17.2433	4.08886	0.000954762	0.0205152	yes	NOS1	XP_017916710.1 PREDICTED: nitric oxide synthase, brain [Capra hircus]	Environmental Information Processing;Metabolism;Cellular Processes;Organismal Systems	Global and Overview;Environmental adaptation;Nervous system;Signal transduction;Amino acid metabolism;Transport and catabolism;Digestive system	ko01100//Metabolic pathways;ko04020//Calcium signaling pathway;ko04145//Phagosome;ko04713//Circadian entrainment;ko01110//Biosynthesis of secondary metabolites;ko04970//Salivary secretion;ko04730//Long-term depression;ko00330//Arginine and proline metabolism;ko00220//Arginine biosynthesis	K13240	GO:0043228//non-membrane-bounded organelle;GO:0044464//cell part;GO:0005622//intracellular;GO:0071944//cell periphery;GO:0098589//membrane region;GO:0043229//intracellular organelle;GO:0012505//endomembrane system;GO:0016020//membrane;GO:0098805//whole membrane;GO:0005886//plasma membrane;GO:0043231//intracellular membrane-bounded organelle;GO:0043227//membrane-bounded organelle;GO:0043226//organ…	GO:0003824//catalytic activity;GO:0005488//binding;GO:0043167//ion binding;GO:0005515//protein binding;GO:0043169//cation binding	GO:0051130//positive regulation of cellular component organization;GO:1903522//regulation of blood circulation;GO:0008152//metabolic process;GO:0051588//regulation of neurotransmitter transport;GO:0008015//blood circulation;GO:0031325//positive regulation of cellular metabolic process;GO:2000112//regulation of cellular macromolecule biosynthetic process;GO:0031401//positive regulation of protein …
TCONS_00051353	704.6	13.5533	5.32667	0.0833333	-5.9982	3.16721e-05	0.00124977	yes	Cit	XP_017916720.1 PREDICTED: citron Rho-interacting kinase isoform X3 [Capra hircus]	-	-	-	-	GO:0043232//intracellular non-membrane-bounded organelle;GO:0044464//cell part;GO:0005623//cell;GO:0005856//cytoskeleton;GO:0031252//cell leading edge;GO:0043229//intracellular organelle;GO:0043231//intracellular membrane-bounded organelle;GO:0043228//non-membrane-bounded organelle;GO:0043227//membrane-bounded organelle;GO:0044424//intracellular part;GO:0005622//intracellular;GO:0043226//organelle	GO:0004672//protein kinase activity;GO:0036094//small molecule binding;GO:0032549//ribonucleoside binding;GO:0001882//nucleoside binding;GO:0032550//purine ribonucleoside binding;GO:0005488//binding;GO:0097367//carbohydrate derivative binding;GO:1901363//heterocyclic compound binding;GO:0043169//cation binding;GO:0019904//protein domain specific binding;GO:0003824//catalytic activity;GO:0001883//…	GO:0023052//signaling;GO:0048523//negative regulation of cellular process;GO:0019953//sexual reproduction;GO:0050794//regulation of cellular process;GO:0044267//cellular protein metabolic process;GO:0060284//regulation of cell development;GO:0048731//system development;GO:0048609//multicellular organismal reproductive process;GO:0000003//reproduction;GO:0032504//multicellular organism reproductio…
TCONS_00051424	315.78	38.4233	4.79333	0.423333	-3.50116	0.000154161	0.00467078	yes	KDM2B	XP_017916764.1 PREDICTED: lysine-specific demethylase 2B isoform X2 [Capra hircus]	-	-	-	-	GO:0044424//intracellular part;GO:0043229//intracellular organelle;GO:0044464//cell part;GO:0043231//intracellular membrane-bounded organelle;GO:0043227//membrane-bounded organelle;GO:0043226//organelle;GO:0032991//macromolecular complex;GO:0005623//cell;GO:0043234//protein complex;GO:0005622//intracellular	GO:0046914//transition metal ion binding;GO:0003676//nucleic acid binding;GO:0005488//binding;GO:0046872//metal ion binding;GO:0043167//ion binding;GO:0097159//organic cyclic compound binding;GO:0043169//cation binding;GO:1901363//heterocyclic compound binding	GO:0032501//multicellular organismal process;GO:0060322//head development;GO:0048562//embryonic organ morphogenesis;GO:0019953//sexual reproduction;GO:0044260//cellular macromolecule metabolic process;GO:0016570//histone modification;GO:0032504//multicellular organism reproduction;GO:0007417//central nervous system development;GO:0006996//organelle organization;GO:0009987//cellular process;GO:004…
TCONS_00051435	874.193	0	29.1667	0.001	-14.832	9.96274e-18	1.17007e-14	yes	RHOF	ELR49827.1 Rho-related GTP-binding protein RhoF, partial [Bos mutus]	-	-	-	-	GO:0016020//membrane;GO:0043232//intracellular non-membrane-bounded organelle;GO:0043227//membrane-bounded organelle;GO:0044424//intracellular part;GO:0005623//cell;GO:0031982//vesicle;GO:0043229//intracellular organelle;GO:0043226//organelle;GO:0043228//non-membrane-bounded organelle;GO:0044464//cell part;GO:0031988//membrane-bounded vesicle;GO:0005622//intracellular	GO:1901363//heterocyclic compound binding;GO:0005488//binding;GO:0097367//carbohydrate derivative binding;GO:0032550//purine ribonucleoside binding;GO:0036094//small molecule binding;GO:0001882//nucleoside binding;GO:0001883//purine nucleoside binding;GO:0032549//ribonucleoside binding;GO:0097159//organic cyclic compound binding	GO:0050896//response to stimulus;GO:0050794//regulation of cellular process;GO:0035556//intracellular signal transduction;GO:0023052//signaling;GO:0007154//cell communication;GO:0044700//single organism signaling;GO:0016043//cellular component organization;GO:0007165//signal transduction;GO:0065007//biological regulation;GO:0044699//single-organism process;GO:0044763//single-organism cellular pro…
TCONS_00051495	1221.53	78.4367	11.4133	0.566667	-4.33208	0.000409503	0.0104267	yes	PITPNM2	XP_017916829.1 PREDICTED: membrane-associated phosphatidylinositol transfer protein 2 isoform X3 [Capra hircus]	-	-	-	-	GO:0043226//organelle;GO:0005623//cell;GO:0044464//cell part;GO:0043227//membrane-bounded organelle	GO:0005488//binding;GO:0043167//ion binding;GO:0043169//cation binding	GO:0051234//establishment of localization;GO:0051179//localization
TCONS_00051532	3310.1	903.623	24.2767	5.27667	-2.20187	0.00130432	0.0262446	yes	NCOR2	XP_017916883.1 PREDICTED: nuclear receptor corepressor 2 isoform X12 [Capra hircus]	Environmental Information Processing	Signal transduction	ko04330//Notch signaling pathway	K06065	GO:0043231//intracellular membrane-bounded organelle;GO:0031974//membrane-enclosed lumen;GO:0005622//intracellular;GO:0044422//organelle part;GO:0005623//cell;GO:0044451//nucleoplasm part;GO:0043234//protein complex;GO:0070013//intracellular organelle lumen;GO:0044446//intracellular organelle part;GO:0005634//nucleus;GO:0043233//organelle lumen;GO:0043226//organelle;GO:0044424//intracellular part…	GO:0005102//receptor binding;GO:0005515//protein binding;GO:1901363//heterocyclic compound binding;GO:0000989//transcription factor activity, transcription factor binding;GO:0003712//transcription cofactor activity;GO:0019899//enzyme binding;GO:0003677//DNA binding;GO:0003676//nucleic acid binding;GO:0000988//transcription factor activity, protein binding;GO:0097159//organic cyclic compound bindi…	GO:0009987//cellular process;GO:0051252//regulation of RNA metabolic process;GO:1903506//regulation of nucleic acid-templated transcription;GO:0019219//regulation of nucleobase-containing compound metabolic process;GO:0050789//regulation of biological process;GO:0010605//negative regulation of macromolecule metabolic process;GO:0009790//embryo development;GO:0010556//regulation of macromolecule b…
TCONS_00051845	32.5167	0	1.1	0.001	-10.1033	0.00199075	0.0364567	yes	UCP1	XP_017916865.1 PREDICTED: mitochondrial brown fat uncoupling protein 1 [Capra hircus]	Organismal Systems	Endocrine system	ko03320//PPAR signaling pathway	K08769	GO:0043227//membrane-bounded organelle;GO:0043231//intracellular membrane-bounded organelle;GO:0016020//membrane;GO:0031975//envelope;GO:0005623//cell;GO:0044422//organelle part;GO:0031967//organelle envelope;GO:0031090//organelle membrane;GO:0005622//intracellular;GO:0044464//cell part;GO:0043229//intracellular organelle;GO:0044446//intracellular organelle part;GO:0044425//membrane part;GO:00312…	GO:0022857//transmembrane transporter activity;GO:0005215//transporter activity	GO:0080090//regulation of primary metabolic process;GO:0060255//regulation of macromolecule metabolic process;GO:0019219//regulation of nucleobase-containing compound metabolic process;GO:0006810//transport;GO:0031326//regulation of cellular biosynthetic process;GO:2000112//regulation of cellular macromolecule biosynthetic process;GO:0032502//developmental process;GO:1903506//regulation of nuclei…
TCONS_00052088	796.57	77.8333	8.00667	0.58	-3.78708	1.3498e-07	1.04042e-05	yes	ZNRF1	EDL11501.1 zinc and ring finger 1, isoform CRA_a, partial [Mus musculus]	-	-	-	-	GO:0000323//lytic vacuole;GO:0044422//organelle part;GO:0043226//organelle;GO:0043231//intracellular membrane-bounded organelle;GO:0044446//intracellular organelle part;GO:0044444//cytoplasmic part;GO:0043227//membrane-bounded organelle;GO:0005737//cytoplasm;GO:0005623//cell;GO:0043229//intracellular organelle;GO:0005622//intracellular;GO:0044464//cell part;GO:0044433//cytoplasmic vesicle part;GO…	GO:0046914//transition metal ion binding;GO:0043167//ion binding;GO:0016879//ligase activity, forming carbon-nitrogen bonds;GO:0070739//protein-glutamic acid ligase activity;GO:0016740//transferase activity;GO:0003824//catalytic activity;GO:0004842//ubiquitin-protein transferase activity;GO:0043169//cation binding;GO:0019787//ubiquitin-like protein transferase activity;GO:0005488//binding;GO:0070…	GO:0009057//macromolecule catabolic process;GO:0044237//cellular metabolic process;GO:0043632//modification-dependent macromolecule catabolic process;GO:0006996//organelle organization;GO:0030163//protein catabolic process;GO:0000209//protein polyubiquitination;GO:0071704//organic substance metabolic process;GO:0043412//macromolecule modification;GO:0044257//cellular protein catabolic process;GO:…
TCONS_00052111	1170.22	85.71	2.97333	0.153333	-4.27734	5.8486e-10	8.00666e-08	yes	pol	XP_012770936.1 hypothetical protein, conserved [Babesia bigemina]	-	-	-	-	-	-	-
TCONS_00052112	1428.81	84.1333	3.81667	0.16	-4.57617	2.26471e-11	4.64603e-09	yes	Pol	XP_012770936.1 hypothetical protein, conserved [Babesia bigemina]	-	-	-	-	-	-	-
TCONS_00052191	420.46	71.4	2.80333	0.373333	-2.90861	0.000561099	0.0134775	yes	GSE1	XP_017917298.1 PREDICTED: genetic suppressor element 1 isoform X3 [Capra hircus]	-	-	-	-	-	-	-
TCONS_00052200	288.317	67.94	10.3533	1.60333	-2.69095	0.00159895	0.0304955	yes	IRF8	XP_017917307.1 PREDICTED: interferon regulatory factor 8 [Capra hircus]	-	-	-	-	GO:0043231//intracellular membrane-bounded organelle;GO:0005622//intracellular;GO:0044424//intracellular part;GO:0044464//cell part;GO:0043226//organelle;GO:0043227//membrane-bounded organelle;GO:0005623//cell;GO:0043229//intracellular organelle	GO:0005488//binding;GO:0003676//nucleic acid binding;GO:1901363//heterocyclic compound binding;GO:0097159//organic cyclic compound binding;GO:0001071//nucleic acid binding transcription factor activity	GO:0051707//response to other organism;GO:0051254//positive regulation of RNA metabolic process;GO:0002376//immune system process;GO:0043900//regulation of multi-organism process;GO:0051173//positive regulation of nitrogen compound metabolic process;GO:1901700//response to oxygen-containing compound;GO:0044763//single-organism cellular process;GO:2001141//regulation of RNA biosynthetic process;GO…
TCONS_00052230	42.57	0	0.223333	0.001	-7.80305	0.000691831	0.0158418	yes	ZNF469	XP_017917329.1 PREDICTED: zinc finger protein 469 [Capra hircus]	-	-	-	-	-	-	-
TCONS_00052620	338.54	46.4567	5.49	0.613333	-3.16206	0.000770776	0.0172686	yes	CTCF	XP_005218654.1 PREDICTED: transcriptional repressor CTCF isoform X2 [Bos taurus]	-	-	-	-	GO:0031974//membrane-enclosed lumen;GO:0098687//chromosomal region;GO:0044446//intracellular organelle part;GO:0070013//intracellular organelle lumen;GO:0005622//intracellular;GO:0043227//membrane-bounded organelle;GO:0043226//organelle;GO:0043233//organelle lumen;GO:0043229//intracellular organelle;GO:0044422//organelle part;GO:0031981//nuclear lumen;GO:0044464//cell part;GO:0005623//cell;GO:004…	GO:0001067//regulatory region nucleic acid binding;GO:0000975//regulatory region DNA binding;GO:0043565//sequence-specific DNA binding;GO:0003690//double-stranded DNA binding;GO:0005488//binding;GO:0001012//RNA polymerase II regulatory region DNA binding;GO:0031490//chromatin DNA binding;GO:0000982//transcription factor activity, RNA polymerase II core promoter proximal region sequence-specific b…	GO:0034728//nucleosome organization;GO:0043170//macromolecule metabolic process;GO:0006139//nucleobase-containing compound metabolic process;GO:0031399//regulation of protein modification process;GO:0031323//regulation of cellular metabolic process;GO:2000112//regulation of cellular macromolecule biosynthetic process;GO:0040029//regulation of gene expression, epigenetic;GO:0006725//cellular aroma…
TCONS_00052626	992.497	23.08	13.7867	0.263333	-5.71024	3.99476e-10	5.65975e-08	yes	RLTPR	XP_017917653.1 PREDICTED: LOW QUALITY PROTEIN: capping protein, Arp2/3 and myosin-I linker protein 2 [Capra hircus]	-	-	-	-	GO:0030054//cell junction;GO:0044424//intracellular part;GO:0043228//non-membrane-bounded organelle;GO:0044464//cell part;GO:0043226//organelle;GO:0015629//actin cytoskeleton;GO:0005623//cell;GO:0043232//intracellular non-membrane-bounded organelle;GO:0005856//cytoskeleton;GO:0005622//intracellular;GO:0043229//intracellular organelle	-	GO:0030155//regulation of cell adhesion;GO:0002764//immune response-regulating signaling pathway;GO:0033036//macromolecule localization;GO:0051240//positive regulation of multicellular organismal process;GO:0050870//positive regulation of T cell activation;GO:1903039//positive regulation of leukocyte cell-cell adhesion;GO:0050793//regulation of developmental process;GO:0042592//homeostatic proces…
TCONS_00052919	1140.37	231.03	27.4167	4.45333	-2.6221	0.000674695	0.0155008	yes	GRAMD1A	XP_017918786.1 PREDICTED: GRAM domain-containing protein 1A isoform X1 [Capra hircus]	-	-	-	-	-	-	-
TCONS_00053001	132.4	0	1.94	0.001	-10.9218	1.34101e-07	1.03722e-05	yes	ARHGAP33	XP_017918780.1 PREDICTED: LOW QUALITY PROTEIN: rho GTPase-activating protein 33 [Capra hircus]	-	-	-	-	GO:0044464//cell part;GO:0005623//cell;GO:0044424//intracellular part;GO:0016020//membrane;GO:0005622//intracellular	GO:0043168//anion binding;GO:0008289//lipid binding;GO:0043167//ion binding;GO:0005543//phospholipid binding;GO:0005488//binding	GO:0065007//biological regulation;GO:0050789//regulation of biological process;GO:0050794//regulation of cellular process
TCONS_00053007	0	95.2233	0.001	1.89	10.8842	4.67904e-05	0.00174599	yes	APLP1	XP_017918808.1 PREDICTED: amyloid-like protein 1 isoform X2 [Capra hircus]	-	-	-	-	GO:0044424//intracellular part;GO:0044464//cell part;GO:0043229//intracellular organelle;GO:0005737//cytoplasm;GO:0016020//membrane;GO:0043226//organelle;GO:0043231//intracellular membrane-bounded organelle;GO:0044425//membrane part;GO:0044444//cytoplasmic part;GO:0005622//intracellular;GO:0043227//membrane-bounded organelle;GO:0031224//intrinsic component of membrane;GO:0005623//cell	GO:0097367//carbohydrate derivative binding;GO:0043169//cation binding;GO:0001664//G-protein coupled receptor binding;GO:0005515//protein binding;GO:0043167//ion binding;GO:0046872//metal ion binding;GO:0005102//receptor binding;GO:0031690//adrenergic receptor binding;GO:0005488//binding;GO:0005539//glycosaminoglycan binding	GO:0070887//cellular response to chemical stimulus;GO:0034641//cellular nitrogen compound metabolic process;GO:0019222//regulation of metabolic process;GO:0030808//regulation of nucleotide biosynthetic process;GO:0030799//regulation of cyclic nucleotide metabolic process;GO:0071407//cellular response to organic cyclic compound;GO:0032502//developmental process;GO:0071867//response to monoamine;GO…
TCONS_00053331	167.66	25.1867	1.77	0.193333	-3.19459	0.00266368	0.0453212	yes	Pou2f2	XP_017917977.1 PREDICTED: POU domain, class 2, transcription factor 2 isoform X5 [Capra hircus]	-	-	-	-	GO:0044464//cell part;GO:0043227//membrane-bounded organelle;GO:0043231//intracellular membrane-bounded organelle;GO:0005623//cell;GO:0043226//organelle;GO:0043229//intracellular organelle;GO:0044424//intracellular part;GO:0005622//intracellular	GO:0097159//organic cyclic compound binding;GO:0001071//nucleic acid binding transcription factor activity;GO:0003677//DNA binding;GO:1901363//heterocyclic compound binding;GO:0005515//protein binding;GO:0003676//nucleic acid binding;GO:0005488//binding	GO:0050896//response to stimulus;GO:0046649//lymphocyte activation;GO:0065007//biological regulation;GO:0050789//regulation of biological process;GO:0045321//leukocyte activation;GO:0033036//macromolecule localization;GO:0051649//establishment of localization in cell;GO:0044765//single-organism transport;GO:0071702//organic substance transport;GO:0009306//protein secretion;GO:2001141//regulation …
TCONS_00053495	0	83.02	0.001	0.46	8.84549	0.00236781	0.0414057	yes	ARHGAP35	XP_017918148.1 PREDICTED: rho GTPase-activating protein 35 [Capra hircus]	Organismal Systems;Cellular Processes	Cellular commiunity;Immune system;Cell motility	ko04810//Regulation of actin cytoskeleton;ko04510//Focal adhesion;ko04611//Platelet activation;ko04670//Leukocyte transendothelial migration	K05732	GO:0044464//cell part;GO:0043231//intracellular membrane-bounded organelle;GO:0043232//intracellular non-membrane-bounded organelle;GO:0005856//cytoskeleton;GO:0005623//cell;GO:0044424//intracellular part;GO:0043226//organelle;GO:0043227//membrane-bounded organelle;GO:0043229//intracellular organelle;GO:0043228//non-membrane-bounded organelle;GO:0005622//intracellular	GO:0097159//organic cyclic compound binding;GO:0001882//nucleoside binding;GO:0032550//purine ribonucleoside binding;GO:0005488//binding;GO:0030234//enzyme regulator activity;GO:0036094//small molecule binding;GO:0003676//nucleic acid binding;GO:0097367//carbohydrate derivative binding;GO:0032549//ribonucleoside binding;GO:0098772//molecular function regulator;GO:0001883//purine nucleoside bindin…	GO:0050793//regulation of developmental process;GO:0006355//regulation of transcription, DNA-templated;GO:0010468//regulation of gene expression;GO:0035148//tube formation;GO:0060606//tube closure;GO:0048513//animal organ development;GO:0009987//cellular process;GO:0060284//regulation of cell development;GO:0022008//neurogenesis;GO:2000112//regulation of cellular macromolecule biosynthetic proces…
TCONS_00053678	137.85	3.16333	4.58	0.0833333	-5.78031	3.94508e-05	0.00150611	yes	Spib	XP_017918373.1 PREDICTED: transcription factor Spi-B isoform X3 [Capra hircus]	-	-	-	-	GO:0005623//cell;GO:0044424//intracellular part;GO:0044464//cell part;GO:0005622//intracellular;GO:0043226//organelle;GO:0043229//intracellular organelle;GO:0043227//membrane-bounded organelle;GO:0043231//intracellular membrane-bounded organelle	GO:0097159//organic cyclic compound binding;GO:0005488//binding;GO:0003676//nucleic acid binding;GO:0001071//nucleic acid binding transcription factor activity;GO:0003677//DNA binding;GO:1901363//heterocyclic compound binding	GO:0002376//immune system process;GO:0002520//immune system development;GO:0048869//cellular developmental process;GO:0010468//regulation of gene expression;GO:0032501//multicellular organismal process;GO:0032502//developmental process;GO:0044767//single-organism developmental process;GO:0044699//single-organism process;GO:0048731//system development;GO:0050789//regulation of biological process;G…
TCONS_00053813	709.203	0	15.83	0.001	-13.9504	2.05837e-21	6.56166e-18	yes	SLC7A3	XP_014337801.1 PREDICTED: cationic amino acid transporter 3-like [Bos mutus]	-	-	-	-	-	-	-
TCONS_00053823	270.083	23.37	5.99667	0.4	-3.90609	7.07997e-05	0.0024532	yes	SLC7A3	XP_017918516.1 PREDICTED: cationic amino acid transporter 3 isoform X2 [Capra hircus]	-	-	-	-	GO:0016020//membrane;GO:0044425//membrane part;GO:0031224//intrinsic component of membrane	GO:0008509//anion transmembrane transporter activity;GO:0022891//substrate-specific transmembrane transporter activity;GO:0022857//transmembrane transporter activity;GO:0005342//organic acid transmembrane transporter activity;GO:0005215//transporter activity;GO:0008514//organic anion transmembrane transporter activity;GO:0046943//carboxylic acid transmembrane transporter activity;GO:0015075//ion …	-
TCONS_00053836	490.877	2.25	7.19	0.02	-8.48985	1.41904e-12	3.98305e-10	yes	SLC7A3	XP_017918521.1 PREDICTED: cationic amino acid transporter 3-like [Capra hircus]	-	-	-	-	GO:0016020//membrane;GO:0044425//membrane part;GO:0031224//intrinsic component of membrane	GO:0005215//transporter activity;GO:0046943//carboxylic acid transmembrane transporter activity;GO:0022891//substrate-specific transmembrane transporter activity;GO:0008509//anion transmembrane transporter activity;GO:0008514//organic anion transmembrane transporter activity;GO:0015075//ion transmembrane transporter activity;GO:0005342//organic acid transmembrane transporter activity;GO:0022892//…	GO:0006811//ion transport;GO:0006810//transport;GO:0046942//carboxylic acid transport;GO:0006820//anion transport;GO:0015849//organic acid transport;GO:1902578//single-organism localization;GO:0051179//localization;GO:0044699//single-organism process;GO:0071702//organic substance transport;GO:0015711//organic anion transport;GO:0044765//single-organism transport;GO:0051234//establishment of local…
TCONS_00053840	743.61	3.82	4.65	0.02	-7.86109	5.08995e-15	2.80444e-12	yes	SLC7A3	XP_014946695.1 PREDICTED: cationic amino acid transporter 3-like isoform X1 [Ovis aries musimon]	-	-	-	-	GO:0016020//membrane;GO:0031224//intrinsic component of membrane;GO:0044425//membrane part	GO:0046943//carboxylic acid transmembrane transporter activity;GO:0005342//organic acid transmembrane transporter activity;GO:0022891//substrate-specific transmembrane transporter activity;GO:0005215//transporter activity;GO:0008509//anion transmembrane transporter activity;GO:0022857//transmembrane transporter activity;GO:0015075//ion transmembrane transporter activity;GO:0022892//substrate-spec…	-
TCONS_00053879	720.207	103.9	54.5567	6.17667	-3.14286	2.74715e-05	0.00110254	yes	UBE2S	XP_015313870.1 PREDICTED: ubiquitin-conjugating enzyme E2 S isoform X1 [Bos taurus]	Genetic Information Processing	Folding, sorting and degradation	ko04120//Ubiquitin mediated proteolysis	K10583	GO:0005622//intracellular;GO:0005634//nucleus;GO:0044446//intracellular organelle part;GO:0044424//intracellular part;GO:0043226//organelle;GO:1990234//transferase complex;GO:0005623//cell;GO:0044464//cell part;GO:0043227//membrane-bounded organelle;GO:0044428//nuclear part;GO:0032991//macromolecular complex;GO:0000151//ubiquitin ligase complex;GO:0043231//intracellular membrane-bounded organelle…	GO:1901363//heterocyclic compound binding;GO:0003824//catalytic activity;GO:0005488//binding;GO:0036094//small molecule binding;GO:0097159//organic cyclic compound binding;GO:0001883//purine nucleoside binding;GO:0032549//ribonucleoside binding;GO:0001882//nucleoside binding;GO:0016740//transferase activity;GO:0032550//purine ribonucleoside binding;GO:0019787//ubiquitin-like protein transferase a…	GO:0051247//positive regulation of protein metabolic process;GO:1903322//positive regulation of protein modification by small protein conjugation or removal;GO:0044260//cellular macromolecule metabolic process;GO:0009987//cellular process;GO:0031396//regulation of protein ubiquitination;GO:0032270//positive regulation of cellular protein metabolic process;GO:0006464//cellular protein modification…
TCONS_00054358	409.223	49.99	20.6467	1.65333	-3.64246	0.00245613	0.0426448	yes	COTL1	XP_006045774.1 PREDICTED: coactosin-like protein [Bubalus bubalis]	-	-	-	-	GO:0031982//vesicle;GO:0044464//cell part;GO:0043226//organelle;GO:0043227//membrane-bounded organelle;GO:0044424//intracellular part;GO:0016020//membrane;GO:0043231//intracellular membrane-bounded organelle;GO:0005622//intracellular;GO:0043232//intracellular non-membrane-bounded organelle;GO:0043228//non-membrane-bounded organelle;GO:0044422//organelle part;GO:0043229//intracellular organelle;GO…	GO:0005515//protein binding;GO:0005488//binding	GO:0043207//response to external biotic stimulus;GO:0051707//response to other organism;GO:0009607//response to biotic stimulus;GO:0051704//multi-organism process;GO:0009605//response to external stimulus;GO:0009620//response to fungus;GO:0050896//response to stimulus
TCONS_00054572	36.3233	0	0.98	0.001	-9.93664	0.00274351	0.0463964	yes	CCDC102A	XP_017917531.1 PREDICTED: coiled-coil domain-containing protein 102A [Capra hircus]	-	-	-	-	-	-	-
TCONS_00054907	214.223	5.72	11.9767	0.273333	-5.45342	0.00108466	0.0226626	yes	-	XP_005908255.1 PREDICTED: uncharacterized protein LOC102273771 [Bos mutus]	-	-	-	-	-	-	-
TCONS_00054916	293.95	28.2167	11.2033	0.796667	-3.81381	2.0417e-05	0.000856382	yes	IGFLR1	XP_006068851.1 PREDICTED: IGF-like family receptor 1 [Bubalus bubalis]	-	-	-	-	GO:0031224//intrinsic component of membrane;GO:0016020//membrane;GO:0044425//membrane part	-	-
TCONS_00055044	585.257	133.913	15.1167	2.72	-2.47446	0.0010559	0.0222287	yes	RINL	XP_011986592.1 PREDICTED: ras and Rab interactor-like protein isoform X2 [Ovis aries musimon]	-	-	-	-	GO:0043232//intracellular non-membrane-bounded organelle;GO:0043226//organelle;GO:0005856//cytoskeleton;GO:0043228//non-membrane-bounded organelle;GO:0005622//intracellular;GO:0044464//cell part;GO:0005623//cell;GO:0044424//intracellular part;GO:0043229//intracellular organelle	-	GO:0050790//regulation of catalytic activity;GO:0051336//regulation of hydrolase activity;GO:0051234//establishment of localization;GO:0019222//regulation of metabolic process;GO:0006810//transport;GO:0050789//regulation of biological process;GO:0016192//vesicle-mediated transport;GO:0043087//regulation of GTPase activity;GO:0065007//biological regulation;GO:0051179//localization;GO:0065009//regu…
TCONS_00055193	606.047	215.543	3.86667	0.986667	-1.97046	0.00277489	0.0467852	yes	Megf8	XP_017917953.1 PREDICTED: multiple epidermal growth factor-like domains protein 8 [Capra hircus]	-	-	-	-	GO:0043227//membrane-bounded organelle;GO:0016020//membrane;GO:0043229//intracellular organelle;GO:0044464//cell part;GO:0005622//intracellular;GO:0044425//membrane part;GO:0043231//intracellular membrane-bounded organelle;GO:0005623//cell;GO:0044424//intracellular part;GO:0031224//intrinsic component of membrane;GO:0031988//membrane-bounded vesicle;GO:0031982//vesicle;GO:0043226//organelle	GO:0043167//ion binding;GO:0046872//metal ion binding;GO:0043169//cation binding;GO:0005488//binding;GO:0060089//molecular transducer activity	GO:0048736//appendage development;GO:0060972//left/right pattern formation;GO:0007167//enzyme linked receptor protein signaling pathway;GO:0045773//positive regulation of axon extension;GO:0032501//multicellular organismal process;GO:0023052//signaling;GO:0009987//cellular process;GO:0045927//positive regulation of growth;GO:0044707//single-multicellular organism process;GO:0016043//cellular comp…
TCONS_00055215	707.95	43.9133	12.8333	0.64	-4.32568	8.2385e-07	5.26757e-05	yes	ARHGEF1	XP_006039923.1 PREDICTED: rho guanine nucleotide exchange factor 1 isoform X3 [Bubalus bubalis]	Organismal Systems;Cellular Processes	Immune system;Circulatory system;Cell motility	ko04810//Regulation of actin cytoskeleton;ko04270//Vascular smooth muscle contraction;ko04611//Platelet activation	K12330	GO:0044424//intracellular part;GO:0044464//cell part;GO:0005623//cell;GO:0016020//membrane;GO:0005622//intracellular	GO:0097159//organic cyclic compound binding;GO:0003723//RNA binding;GO:1901363//heterocyclic compound binding;GO:0005488//binding;GO:0003676//nucleic acid binding	GO:0045744//negative regulation of G-protein coupled receptor protein signaling pathway;GO:0048523//negative regulation of cellular process;GO:0023051//regulation of signaling;GO:0010646//regulation of cell communication;GO:0065007//biological regulation;GO:0048585//negative regulation of response to stimulus;GO:0019222//regulation of metabolic process;GO:0050789//regulation of biological process…
TCONS_00055238	104.593	4.12667	1.87	0.05	-5.22497	0.000211741	0.00602429	yes	Ceacam1	XP_017918671.1 PREDICTED: LOW QUALITY PROTEIN: carcinoembryonic antigen-related cell adhesion molecule 21 [Capra hircus]	-	-	-	-	-	-	-
TCONS_00055670	140.447	11.4667	7.45333	0.373333	-4.31935	0.00153475	0.0296092	yes	SIGLEC14	XP_017918436.1 PREDICTED: LOW QUALITY PROTEIN: sialic acid-binding Ig-like lectin 14 [Capra hircus]	-	-	-	-	-	-	-
TCONS_00055859	48.6167	0	6.14	0.001	-12.584	0.000235357	0.00660198	yes	SLC7A3	ELR47339.1 hypothetical protein M91_03249, partial [Bos mutus]	-	-	-	-	GO:0016020//membrane	-	-
TCONS_00056117	0	72.76	0.001	1.13	10.1421	0.000176343	0.00519474	yes	Pol	ELR47876.1 hypothetical protein M91_20604 [Bos mutus]	-	-	-	-	-	-	-
TCONS_00056218	110.92	46831.3	3.03	884.907	8.19006	7.7212e-08	6.32079e-06	yes	LPO	XP_017919048.1 PREDICTED: lactoperoxidase isoform X1 [Capra hircus]	Organismal Systems	Digestive system	ko04970//Salivary secretion	K12550	GO:0044421//extracellular region part;GO:0044464//cell part;GO:0016020//membrane;GO:0043226//organelle;GO:0044424//intracellular part;GO:0031988//membrane-bounded vesicle;GO:0043227//membrane-bounded organelle;GO:0005576//extracellular region;GO:0031982//vesicle;GO:0005622//intracellular;GO:0005623//cell	GO:0043169//cation binding;GO:1901363//heterocyclic compound binding;GO:0043167//ion binding;GO:0003824//catalytic activity;GO:0097159//organic cyclic compound binding;GO:0005488//binding;GO:0016209//antioxidant activity;GO:0016491//oxidoreductase activity;GO:0016684//oxidoreductase activity, acting on peroxide as acceptor;GO:0046872//metal ion binding;GO:0004601//peroxidase activity;GO:0046906//…	GO:0006790//sulfur compound metabolic process;GO:0042742//defense response to bacterium;GO:0009617//response to bacterium;GO:0072593//reactive oxygen species metabolic process;GO:0009607//response to biotic stimulus;GO:0098542//defense response to other organism;GO:0006952//defense response;GO:0051707//response to other organism;GO:0044237//cellular metabolic process;GO:0043207//response to exter…
TCONS_00056283	164.753	0.00333333	2.45	0.001	-11.2586	0.00114899	0.0237619	yes	INTS2	XP_004012470.2 PREDICTED: integrator complex subunit 2 isoform X2 [Ovis aries]	-	-	-	-	GO:0032991//macromolecular complex;GO:0043234//protein complex;GO:0044464//cell part;GO:0005623//cell	-	GO:0071704//organic substance metabolic process;GO:0044260//cellular macromolecule metabolic process;GO:0008152//metabolic process;GO:0006725//cellular aromatic compound metabolic process;GO:0006807//nitrogen compound metabolic process;GO:0016073//snRNA metabolic process;GO:0009987//cellular process;GO:0034641//cellular nitrogen compound metabolic process;GO:0090304//nucleic acid metabolic proces…
TCONS_00056399	545.763	96.1433	32.3033	4.22333	-2.93523	4.99632e-05	0.00183978	yes	Crlf3	XP_017919752.1 PREDICTED: cytokine receptor-like factor 3 [Capra hircus]	-	-	-	-	GO:0005623//cell;GO:0005622//intracellular;GO:0044464//cell part;GO:0044424//intracellular part	-	GO:0031326//regulation of cellular biosynthetic process;GO:0080090//regulation of primary metabolic process;GO:1903047//mitotic cell cycle process;GO:0009966//regulation of signal transduction;GO:0050789//regulation of biological process;GO:0006357//regulation of transcription from RNA polymerase II promoter;GO:2001141//regulation of RNA biosynthetic process;GO:1904892//regulation of STAT cascade…
TCONS_00056402	704.353	144.353	20.12	3.02333	-2.73442	4.04946e-05	0.00154201	yes	CRLF3	XP_005896753.1 PREDICTED: cytokine receptor-like factor 3 [Bos mutus]	-	-	-	-	GO:0005622//intracellular;GO:0044424//intracellular part;GO:0044464//cell part;GO:0005623//cell	-	GO:0040008//regulation of growth;GO:0010556//regulation of macromolecule biosynthetic process;GO:0001558//regulation of cell growth;GO:0051726//regulation of cell cycle;GO:2001141//regulation of RNA biosynthetic process;GO:1904892//regulation of STAT cascade;GO:0022402//cell cycle process;GO:0010468//regulation of gene expression;GO:0031326//regulation of cellular biosynthetic process;GO:1903047/…
TCONS_00056464	86.6067	0.58	1.76	0.00666667	-8.04439	7.35643e-05	0.00253717	yes	Foxn1	XP_017919786.1 PREDICTED: forkhead box protein N1 isoform X2 [Capra hircus]	-	-	-	-	-	-	-
TCONS_00056731	69.07	0	0.896667	0.001	-9.80843	9.03535e-05	0.00301374	yes	ACAP1	KFO18822.1 Arf-GAP with coiled-coil, ANK repeat and PH domain-containing protein 1 [Fukomys damarensis]	Cellular Processes	Transport and catabolism	ko04144//Endocytosis	K12489	GO:0098588//bounding membrane of organelle;GO:0016020//membrane;GO:0044422//organelle part;GO:0044444//cytoplasmic part;GO:0043227//membrane-bounded organelle;GO:0012505//endomembrane system;GO:0005737//cytoplasm;GO:0005622//intracellular;GO:0010008//endosome membrane;GO:0044446//intracellular organelle part;GO:0044440//endosomal part;GO:0043226//organelle;GO:0043229//intracellular organelle;GO:0…	GO:0046914//transition metal ion binding;GO:0003824//catalytic activity;GO:0043167//ion binding;GO:0005488//binding;GO:0043169//cation binding;GO:0046872//metal ion binding	GO:0050794//regulation of cellular process;GO:0065007//biological regulation;GO:0050789//regulation of biological process
TCONS_00056798	424.27	0.0766667	3.53	0.001	-11.7855	0.000184865	0.00541716	yes	KDM6B	XP_017920085.1 PREDICTED: LOW QUALITY PROTEIN: lysine-specific demethylase 6B [Capra hircus]	-	-	-	-	GO:0005623//cell;GO:0044424//intracellular part;GO:0044446//intracellular organelle part;GO:0044422//organelle part;GO:0043227//membrane-bounded organelle;GO:0044464//cell part;GO:0031974//membrane-enclosed lumen;GO:0070013//intracellular organelle lumen;GO:0044428//nuclear part;GO:0005622//intracellular;GO:0005634//nucleus;GO:0043229//intracellular organelle;GO:0031981//nuclear lumen;GO:0043226/…	GO:0005515//protein binding;GO:0003677//DNA binding;GO:0003676//nucleic acid binding;GO:1901363//heterocyclic compound binding;GO:0032451//demethylase activity;GO:0043169//cation binding;GO:0097159//organic cyclic compound binding;GO:0016491//oxidoreductase activity;GO:0043167//ion binding;GO:0032452//histone demethylase activity;GO:0005488//binding;GO:0003824//catalytic activity	GO:1902589//single-organism organelle organization;GO:0070887//cellular response to chemical stimulus;GO:0006325//chromatin organization;GO:0010468//regulation of gene expression;GO:0016043//cellular component organization;GO:0006464//cellular protein modification process;GO:0042221//response to chemical;GO:1901701//cellular response to oxygen-containing compound;GO:0050896//response to stimulus;…
TCONS_00056799	1036.45	31.4167	9.31	0.24	-5.27767	0.0019431	0.0357122	yes	KDM6B	XP_017920085.1 PREDICTED: LOW QUALITY PROTEIN: lysine-specific demethylase 6B [Capra hircus]	-	-	-	-	GO:0043227//membrane-bounded organelle;GO:0044464//cell part;GO:0005634//nucleus;GO:0005623//cell;GO:0043229//intracellular organelle;GO:0044428//nuclear part;GO:0044424//intracellular part;GO:0031974//membrane-enclosed lumen;GO:0043226//organelle;GO:0031981//nuclear lumen;GO:0070013//intracellular organelle lumen;GO:0005622//intracellular;GO:0043231//intracellular membrane-bounded organelle;GO:0…	GO:1901363//heterocyclic compound binding;GO:0003824//catalytic activity;GO:0032452//histone demethylase activity;GO:0097159//organic cyclic compound binding;GO:0003677//DNA binding;GO:0032451//demethylase activity;GO:0016491//oxidoreductase activity;GO:0043167//ion binding;GO:0005515//protein binding;GO:0043169//cation binding;GO:0005488//binding;GO:0003676//nucleic acid binding	GO:0051252//regulation of RNA metabolic process;GO:0044237//cellular metabolic process;GO:0043933//macromolecular complex subunit organization;GO:0060255//regulation of macromolecule metabolic process;GO:0031326//regulation of cellular biosynthetic process;GO:0031323//regulation of cellular metabolic process;GO:0007275//multicellular organism development;GO:1901701//cellular response to oxygen-co…
TCONS_00057120	2483.17	620.593	60.75	11.5267	-2.39791	0.000173557	0.005133	yes	PPP1R9B	XP_014938835.1 PREDICTED: LOW QUALITY PROTEIN: neurabin-1-like [Acinonyx jubatus]	-	-	-	-	GO:0044444//cytoplasmic part;GO:0031253//cell projection membrane;GO:0005737//cytoplasm;GO:0030863//cortical cytoskeleton;GO:0098805//whole membrane;GO:0044463//cell projection part;GO:0016020//membrane;GO:0043227//membrane-bounded organelle;GO:0043229//intracellular organelle;GO:0044448//cell cortex part;GO:0043231//intracellular membrane-bounded organelle;GO:0044428//nuclear part;GO:0005938//ce…	GO:0019903//protein phosphatase binding;GO:0019902//phosphatase binding;GO:0005488//binding;GO:0019899//enzyme binding;GO:0008092//cytoskeletal protein binding;GO:0005515//protein binding	GO:0050794//regulation of cellular process;GO:0008277//regulation of G-protein coupled receptor protein signaling pathway;GO:0007010//cytoskeleton organization;GO:0022607//cellular component assembly;GO:0050896//response to stimulus;GO:0014072//response to isoquinoline alkaloid;GO:0006996//organelle organization;GO:0051716//cellular response to stimulus;GO:0048870//cell motility;GO:0008283//cell …
TCONS_00057132	1160.64	90.33	34.72	2.12667	-4.0291	4.48865e-07	3.04907e-05	yes	FAM117A	XP_017920394.1 PREDICTED: protein FAM117A [Capra hircus]	-	-	-	-	-	-	-
TCONS_00057526	2045.29	91.0933	32.7567	1.15	-4.83208	3.66968e-09	4.1253e-07	yes	Fmnl1	XP_017920754.1 PREDICTED: formin-like protein 1 isoform X2 [Capra hircus]	-	-	-	-	-	-	-
TCONS_00057679	260.35	15.0167	16.5	0.603333	-4.77337	0.000606143	0.0143054	yes	Sectm1a	XP_014954381.1 PREDICTED: secreted and transmembrane protein 1A-like isoform X2 [Ovis aries]	Organismal Systems	Immune system	ko04640//Hematopoietic cell lineage	K06457	-	-	-
TCONS_00057710	90.1033	0	1.53	0.001	-10.5793	0.000340533	0.00898736	yes	Mafg	XP_011964784.1 PREDICTED: transcription factor MafG isoform X1 [Ovis aries musimon]	-	-	-	-	-	-	-
TCONS_00057835	243.313	0	5.13	0.001	-12.3247	3.52478e-09	3.98247e-07	yes	TMC6	XP_017919187.1 PREDICTED: transmembrane channel-like protein 6 isoform X6 [Capra hircus]	-	-	-	-	-	-	-
TCONS_00057836	776.053	55.3567	16.1267	0.946667	-4.09045	3.11852e-06	0.000166878	yes	TMC6	XP_017919186.1 PREDICTED: transmembrane channel-like protein 6 isoform X5 [Capra hircus]	-	-	-	-	-	-	-
TCONS_00057922	40.5533	0	0.5	0.001	-8.96578	0.00047496	0.0117435	yes	EVPL	XP_017919257.1 PREDICTED: envoplakin [Capra hircus]	-	-	-	-	-	-	-
TCONS_00058288	1691.9	0	57.8567	0.001	-15.8202	1.54574e-09	1.89519e-07	yes	MPO	XP_017919060.1 PREDICTED: myeloperoxidase isoform X1 [Capra hircus]	Cellular Processes	Transport and catabolism	ko04145//Phagosome	K10789	GO:0043226//organelle;GO:0043231//intracellular membrane-bounded organelle;GO:0005576//extracellular region;GO:0000323//lytic vacuole;GO:0005622//intracellular;GO:0044421//extracellular region part;GO:0005773//vacuole;GO:0005764//lysosome;GO:0031988//membrane-bounded vesicle;GO:0031982//vesicle;GO:0005766//primary lysosome;GO:0044424//intracellular part;GO:0044464//cell part;GO:0044444//cytoplasm…	GO:0046906//tetrapyrrole binding;GO:0016209//antioxidant activity;GO:0005539//glycosaminoglycan binding;GO:0097159//organic cyclic compound binding;GO:0097367//carbohydrate derivative binding;GO:0005488//binding;GO:1901363//heterocyclic compound binding	GO:0034367//macromolecular complex remodeling;GO:0002148//hypochlorous acid metabolic process;GO:0072593//reactive oxygen species metabolic process;GO:0042743//hydrogen peroxide metabolic process;GO:0006082//organic acid metabolic process;GO:0043207//response to external biotic stimulus;GO:0051704//multi-organism process;GO:0071825//protein-lipid complex subunit organization;GO:0009987//cellular …
TCONS_00058293	669.503	24.8433	4.91667	0.133333	-5.20457	4.03434e-10	5.69773e-08	yes	BZRAP1	XP_017919604.1 PREDICTED: peripheral-type benzodiazepine receptor-associated protein 1 isoform X2 [Capra hircus]	-	-	-	-	GO:0043227//membrane-bounded organelle;GO:0044464//cell part;GO:0043231//intracellular membrane-bounded organelle;GO:0044424//intracellular part;GO:0005623//cell;GO:0043226//organelle;GO:0005622//intracellular;GO:0043229//intracellular organelle	GO:0005488//binding;GO:0005515//protein binding;GO:0005102//receptor binding	-
TCONS_00058473	209.843	10.6933	1.51	0.0533333	-4.82337	0.0023155	0.0407807	yes	ZNF207	XP_008995357.1 PREDICTED: BUB3-interacting and GLEBS motif-containing protein ZNF207 isoform X4 [Callithrix jacchus]	-	-	-	-	GO:0000776//kinetochore;GO:0044446//intracellular organelle part;GO:0000775//chromosome, centromeric region;GO:0005694//chromosome;GO:0015630//microtubule cytoskeleton;GO:0043232//intracellular non-membrane-bounded organelle;GO:0044427//chromosomal part;GO:0043229//intracellular organelle;GO:0044422//organelle part;GO:0098687//chromosomal region;GO:0032991//macromolecular complex;GO:0005622//intr…	GO:0097159//organic cyclic compound binding;GO:0003676//nucleic acid binding;GO:0046872//metal ion binding;GO:0001071//nucleic acid binding transcription factor activity;GO:0043169//cation binding;GO:0003723//RNA binding;GO:0097367//carbohydrate derivative binding;GO:0015631//tubulin binding;GO:0046914//transition metal ion binding;GO:0005515//protein binding;GO:0008092//cytoskeletal protein bind…	GO:0006996//organelle organization;GO:0016043//cellular component organization;GO:0071840//cellular component organization or biogenesis;GO:0007059//chromosome segregation;GO:0000075//cell cycle checkpoint;GO:0000280//nuclear division;GO:0051276//chromosome organization;GO:0044699//single-organism process;GO:0022402//cell cycle process;GO:0065007//biological regulation;GO:0031647//regulation of p…
TCONS_00058890	592.337	167.753	19.3067	4.26667	-2.17792	0.00283673	0.047487	yes	PHF23	XP_017920043.1 PREDICTED: PHD finger protein 23 [Capra hircus]	-	-	-	-	-	GO:0043167//ion binding;GO:0043169//cation binding;GO:0005488//binding	-
TCONS_00058947	71.0433	898.707	1.24667	9.44333	2.92122	0.00159313	0.0304365	yes	PER1	XP_017920102.1 PREDICTED: period circadian protein homolog 1 isoform X2 [Capra hircus]	Organismal Systems	Environmental adaptation	ko04713//Circadian entrainment;ko04710//Circadian rhythm	K02633	GO:0044464//cell part;GO:0043226//organelle;GO:0005623//cell;GO:0005622//intracellular;GO:0043229//intracellular organelle;GO:0044424//intracellular part;GO:0043231//intracellular membrane-bounded organelle;GO:0043227//membrane-bounded organelle	GO:1901363//heterocyclic compound binding;GO:0000988//transcription factor activity, protein binding;GO:0005515//protein binding;GO:0001067//regulatory region nucleic acid binding;GO:0019899//enzyme binding;GO:0003682//chromatin binding;GO:0044877//macromolecular complex binding;GO:0043565//sequence-specific DNA binding;GO:0001012//RNA polymerase II regulatory region DNA binding;GO:0044389//ubiqu…	GO:0044699//single-organism process;GO:0051246//regulation of protein metabolic process;GO:0006476//protein deacetylation;GO:0006325//chromatin organization;GO:0006357//regulation of transcription from RNA polymerase II promoter;GO:0006355//regulation of transcription, DNA-templated;GO:0043170//macromolecule metabolic process;GO:0010556//regulation of macromolecule biosynthetic process;GO:0050896…
TCONS_00059221	83.2833	4.69667	1.98333	0.08	-4.63178	0.00122864	0.0250114	yes	WFIKKN2	XP_017920344.1 PREDICTED: WAP, Kazal, immunoglobulin, Kunitz and NTR domain-containing protein 2 [Capra hircus]	-	-	-	-	-	GO:0030414//peptidase inhibitor activity;GO:0098772//molecular function regulator;GO:0061134//peptidase regulator activity;GO:0061135//endopeptidase regulator activity;GO:0004857//enzyme inhibitor activity;GO:0004866//endopeptidase inhibitor activity;GO:0030234//enzyme regulator activity	GO:0050896//response to stimulus;GO:0050790//regulation of catalytic activity;GO:0031323//regulation of cellular metabolic process;GO:0051100//negative regulation of binding;GO:0010605//negative regulation of macromolecule metabolic process;GO:0030162//regulation of proteolysis;GO:0032268//regulation of cellular protein metabolic process;GO:0019222//regulation of metabolic process;GO:0051716//cel…
TCONS_00059307	543.66	35.5	6.78	0.38	-4.15721	6.46203e-05	0.00228865	yes	ITGA3	XP_005964715.1 PREDICTED: integrin alpha-3 [Pantholops hodgsonii]	Cellular Processes;Environmental Information Processing;Organismal Systems	Immune system;Cellular commiunity;Signaling molecules and interaction;Cell motility;Signal transduction	ko04151//PI3K-Akt signaling pathway;ko04810//Regulation of actin cytoskeleton;ko04510//Focal adhesion;ko04640//Hematopoietic cell lineage;ko04512//ECM-receptor interaction	K06482	GO:0031982//vesicle;GO:0043226//organelle;GO:0016021//integral component of membrane;GO:0098797//plasma membrane protein complex;GO:0044464//cell part;GO:0031226//intrinsic component of plasma membrane;GO:0071944//cell periphery;GO:0043235//receptor complex;GO:0098805//whole membrane;GO:0042995//cell projection;GO:0070161//anchoring junction;GO:0005912//adherens junction;GO:0032991//macromolecula…	GO:0043167//ion binding;GO:0019899//enzyme binding;GO:0005515//protein binding;GO:0046983//protein dimerization activity;GO:0043169//cation binding;GO:0005488//binding	GO:0050890//cognition;GO:0090092//regulation of transmembrane receptor protein serine/threonine kinase signaling pathway;GO:0048518//positive regulation of biological process;GO:0048522//positive regulation of cellular process;GO:0003008//system process;GO:0050794//regulation of cellular process;GO:0022610//biological adhesion;GO:0030154//cell differentiation;GO:0032501//multicellular organismal …
TCONS_00059414	1477.88	0	17.6833	0.001	-14.1101	5.85008e-19	9.81287e-16	yes	Pip4k2b	NP_001179125.1 phosphatidylinositol 5-phosphate 4-kinase type-2 beta [Bos taurus]	Cellular Processes;Metabolism;Environmental Information Processing	Carbohydrate metabolism;Cell motility;Signal transduction	ko04810//Regulation of actin cytoskeleton;ko04070//Phosphatidylinositol signaling system;ko00562//Inositol phosphate metabolism	K00920	-	GO:0016301//kinase activity;GO:0016772//transferase activity, transferring phosphorus-containing groups;GO:0003824//catalytic activity;GO:0016773//phosphotransferase activity, alcohol group as acceptor;GO:0016740//transferase activity;GO:0016307//phosphatidylinositol phosphate kinase activity	GO:0044255//cellular lipid metabolic process;GO:0071704//organic substance metabolic process;GO:0008152//metabolic process;GO:0009987//cellular process;GO:0006650//glycerophospholipid metabolic process;GO:0019637//organophosphate metabolic process;GO:0006644//phospholipid metabolic process;GO:0044237//cellular metabolic process;GO:0044763//single-organism cellular process;GO:0006793//phosphorus m…
TCONS_00059481	1727.59	38.3867	23.96	0.363333	-6.04319	4.32887e-12	1.06737e-09	yes	TOP2A	XP_012041459.1 PREDICTED: DNA topoisomerase 2-alpha isoform X2 [Ovis aries]	-	-	-	-	-	-	-
TCONS_00059670	0	97.6933	0.001	2.14333	11.0656	0.00142727	0.0279743	yes	Vat1	XP_012007791.1 PREDICTED: synaptic vesicle membrane protein VAT-1 homolog isoform X2 [Ovis aries musimon]	-	-	-	-	GO:0043227//membrane-bounded organelle;GO:0031982//vesicle;GO:0031988//membrane-bounded vesicle;GO:0043226//organelle	GO:0003824//catalytic activity	GO:0050793//regulation of developmental process;GO:0022603//regulation of anatomical structure morphogenesis;GO:0010821//regulation of mitochondrion organization;GO:0008152//metabolic process;GO:0051128//regulation of cellular component organization;GO:0044699//single-organism process;GO:0044710//single-organism metabolic process;GO:0050794//regulation of cellular process;GO:0050789//regulation o…
TCONS_00059674	339.21	0	3.60667	0.001	-11.8165	2.74452e-14	1.22485e-11	yes	BRCA1	XP_017920655.1 PREDICTED: breast cancer type 1 susceptibility protein isoform X2 [Capra hircus]	Environmental Information Processing;Genetic Information Processing	Replication and repair;Folding, sorting and degradation;Signal transduction	ko04151//PI3K-Akt signaling pathway;ko04120//Ubiquitin mediated proteolysis;ko03460//Fanconi anemia pathway	K10605	-	-	-
TCONS_00059800	81.05	0.333333	2.65667	0.00666667	-8.63844	0.000145828	0.00446375	yes	SPATA32	XP_005983820.1 PREDICTED: spermatogenesis-associated protein 32 [Pantholops hodgsonii]	-	-	-	-	-	-	-
TCONS_00059856	1153.29	14.7767	68.16	0.693333	-6.61923	1.0475e-13	4.21161e-11	yes	LIMD2	XP_012041700.1 PREDICTED: LIM domain-containing protein 2 [Ovis aries]	-	-	-	-	-	-	-
TCONS_00059873	9.41333	670.337	0.21	13.39	5.99462	1.86947e-05	0.000790082	yes	SMARCD2	XP_014703449.1 PREDICTED: SWI/SNF-related matrix-associated actin-dependent regulator of chromatin subfamily D member 2 isoform X3 [Equus asinus]	-	-	-	-	-	-	-
TCONS_00059874	995.803	0.0566667	26.06	0.001	-14.6695	8.31517e-21	2.18293e-17	yes	SMARCD2	XP_005976262.1 PREDICTED: SWI/SNF-related matrix-associated actin-dependent regulator of chromatin subfamily D member 2 [Pantholops hodgsonii]	-	-	-	-	-	-	-
TCONS_00059888	394.807	89.7333	10.21	1.55667	-2.71345	0.000393153	0.0101363	yes	ICAM2	XP_017919507.1 PREDICTED: intercellular adhesion molecule 2-like [Capra hircus]	Organismal Systems;Environmental Information Processing	Immune system;Signaling molecules and interaction	ko04514//Cell adhesion molecules (CAMs);ko04650//Natural killer cell mediated cytotoxicity	K06523	-	-	-
TCONS_00060098	6805.9	785.86	30.1433	2.33667	-3.68932	3.03899e-06	0.000163013	yes	RNF213	XP_013827796.2 PREDICTED: E3 ubiquitin-protein ligase RNF213 isoform X3 [Capra hircus]	-	-	-	-	-	-	-
TCONS_00060130	166.257	5.75667	2.46667	0.06	-5.36146	0.00164367	0.0312162	yes	CBX2	XP_017919140.1 PREDICTED: chromobox protein homolog 2 [Capra hircus]	-	-	-	-	-	-	-
TCONS_00060205	1099.36	25.08	20.8967	0.39	-5.74365	5.3807e-09	5.82852e-07	yes	SEPT9	XP_010854539.1 PREDICTED: septin-9 isoform X4 [Bison bison bison]	-	-	-	-	-	-	-
TCONS_00060576	924.633	97.8433	10.65	0.903333	-3.55945	2.0673e-05	0.000864901	yes	NEURL1B	XP_014944221.1 PREDICTED: E3 ubiquitin-protein ligase NEURL1B isoform X2 [Ovis aries musimon]	-	-	-	-	-	-	-
TCONS_00060696	53.87	0	0.56	0.001	-9.12928	0.000126914	0.00399722	yes	ADAMTS6	XP_004016986.1 PREDICTED: A disintegrin and metalloproteinase with thrombospondin motifs 6 isoform X1 [Ovis aries]	-	-	-	-	-	-	-
TCONS_00060979	0	106.417	0.001	0.486667	8.92679	0.00152514	0.0294656	yes	C5orf42	XP_017921153.1 PREDICTED: uncharacterized protein C5orf42 homolog isoform X1 [Capra hircus]	-	-	-	-	-	-	-
TCONS_00061101	4.46	9563.59	0.42	506.083	10.2348	1.92635e-06	0.000110368	yes	-	XP_010796655.1 PREDICTED: odorant-binding protein-like [Bos taurus]	-	-	-	-	-	-	-
TCONS_00061137	40.6733	0	0.963333	0.001	-9.91189	0.00197041	0.0361146	yes	SLC6A3	XP_011980585.1 PREDICTED: sodium-dependent dopamine transporter isoform X2 [Ovis aries musimon]	Organismal Systems	Nervous system	ko04728//Dopaminergic synapse	K05036	-	-	-
TCONS_00061292	0	123.803	0.001	1.12667	10.1378	8.54677e-06	0.000405349	yes	MARVELD2	XP_017921183.1 PREDICTED: MARVEL domain-containing protein 2 [Capra hircus]	-	-	-	-	-	-	-
TCONS_00061362	8.83667	347.213	0.13	2.96667	4.51226	0.00218538	0.0390431	yes	ERBB2IP	XP_013828180.2 PREDICTED: protein LAP2 isoform X13 [Capra hircus]	Organismal Systems	Immune system	ko04621//NOD-like receptor signaling pathway	K12796	-	-	-
TCONS_00061803	0	92.76	0.001	1.18333	10.2086	4.63918e-05	0.00173402	yes	-	XP_005694968.1 PREDICTED: uncharacterized protein LOC102188534 [Capra hircus]	-	-	-	-	-	-	-
TCONS_00061931	0	735.877	0.001	3.09667	11.5965	3.19493e-18	4.45583e-15	yes	AKAP13	XP_017921494.1 PREDICTED: A-kinase anchor protein 13 isoform X4 [Capra hircus]	-	-	-	-	-	-	-
TCONS_00061968	739.993	0.45	5.77333	0.00333333	-10.7582	4.43227e-06	0.000228944	yes	ABHD2	XP_006058254.1 PREDICTED: abhydrolase domain-containing protein 2 isoform X1 [Bubalus bubalis]	-	-	-	-	-	-	-
TCONS_00062120	1038.58	2.79	29.8633	0.0633333	-8.88119	1.82206e-12	4.95834e-10	yes	IL16	XP_013828519.2 PREDICTED: pro-interleukin-16 isoform X2 [Capra hircus]	-	-	-	-	GO:0016020//membrane;GO:0043231//intracellular membrane-bounded organelle;GO:0043227//membrane-bounded organelle;GO:0005622//intracellular;GO:0044424//intracellular part;GO:0005623//cell;GO:0044464//cell part;GO:0043226//organelle;GO:0043229//intracellular organelle	-	GO:0006928//movement of cell or subcellular component;GO:0032101//regulation of response to external stimulus;GO:0048520//positive regulation of behavior;GO:0050920//regulation of chemotaxis;GO:0040017//positive regulation of locomotion;GO:0050789//regulation of biological process;GO:0050795//regulation of behavior;GO:0016477//cell migration;GO:0040011//locomotion;GO:0048870//cell motility;GO:004…
TCONS_00062727	131.933	0.0233333	2.55333	0.001	-11.3182	7.15283e-06	0.000344734	yes	EVL	XP_017921524.1 PREDICTED: ena/VASP-like protein isoform X3 [Capra hircus]	-	-	-	-	GO:0031252//cell leading edge;GO:0043228//non-membrane-bounded organelle;GO:0005623//cell;GO:0043229//intracellular organelle;GO:0030054//cell junction;GO:0070161//anchoring junction;GO:0044424//intracellular part;GO:0005912//adherens junction;GO:0005924//cell-substrate adherens junction;GO:0005622//intracellular;GO:0043232//intracellular non-membrane-bounded organelle;GO:0030055//cell-substrate …	GO:0019904//protein domain specific binding;GO:0005488//binding;GO:0005515//protein binding	GO:0051129//negative regulation of cellular component organization;GO:0043254//regulation of protein complex assembly;GO:0032233//positive regulation of actin filament bundle assembly;GO:0051493//regulation of cytoskeleton organization;GO:0051130//positive regulation of cellular component organization;GO:0032231//regulation of actin filament bundle assembly;GO:0051270//regulation of cellular comp…
TCONS_00062733	913.257	85.9933	24.0267	1.77667	-3.75739	1.46657e-06	8.7269e-05	yes	EVL	XP_017921522.1 PREDICTED: ena/VASP-like protein isoform X1 [Capra hircus]	-	-	-	-	GO:0005912//adherens junction;GO:0043232//intracellular non-membrane-bounded organelle;GO:0005623//cell;GO:0005924//cell-substrate adherens junction;GO:0070161//anchoring junction;GO:0044464//cell part;GO:0030054//cell junction;GO:0005622//intracellular;GO:0043229//intracellular organelle;GO:0043226//organelle;GO:0030055//cell-substrate junction;GO:0044424//intracellular part;GO:0031252//cell lea…	GO:0005488//binding;GO:0005515//protein binding;GO:0019904//protein domain specific binding	GO:0065007//biological regulation;GO:0065008//regulation of biological quality;GO:0051270//regulation of cellular component movement;GO:0044087//regulation of cellular component biogenesis;GO:0051495//positive regulation of cytoskeleton organization;GO:0032233//positive regulation of actin filament bundle assembly;GO:0048522//positive regulation of cellular process;GO:0048518//positive regulation…
TCONS_00062952	838.217	250.81	8.84333	1.98333	-2.15666	0.000893351	0.0194295	yes	Mta1	XP_012022035.2 PREDICTED: metastasis-associated protein MTA1 isoform X2 [Ovis aries musimon]	-	-	-	-	GO:0044424//intracellular part;GO:0043233//organelle lumen;GO:1902494//catalytic complex;GO:0044464//cell part;GO:0005634//nucleus;GO:0000118//histone deacetylase complex;GO:0005654//nucleoplasm;GO:0005622//intracellular;GO:0031974//membrane-enclosed lumen;GO:0070013//intracellular organelle lumen;GO:0043231//intracellular membrane-bounded organelle;GO:0015630//microtubule cytoskeleton;GO:0043226…	GO:0000976//transcription regulatory region sequence-specific DNA binding;GO:0003676//nucleic acid binding;GO:0001071//nucleic acid binding transcription factor activity;GO:0005488//binding;GO:0044212//transcription regulatory region DNA binding;GO:0008134//transcription factor binding;GO:0043167//ion binding;GO:0043565//sequence-specific DNA binding;GO:0003690//double-stranded DNA binding;GO:190…	GO:0006259//DNA metabolic process;GO:0044237//cellular metabolic process;GO:0006996//organelle organization;GO:0031323//regulation of cellular metabolic process;GO:0006807//nitrogen compound metabolic process;GO:0044257//cellular protein catabolic process;GO:0010033//response to organic substance;GO:0009056//catabolic process;GO:0044763//single-organism cellular process;GO:0050794//regulation of …
TCONS_00062992	960.783	0	46.9433	0.001	-15.5186	1.50919e-07	1.15529e-05	yes	Ighv3-6	XP_006039907.1 PREDICTED: uncharacterized protein LOC102396580, partial [Bubalus bubalis]	-	-	-	-	-	-	-
TCONS_00062998	8579.69	265019	559.57	10458.8	4.22426	5.68096e-05	0.00205225	yes	IGHA1	AMP34155.1 immunoglobulin alpha heavy chain, partial [Capra hircus]	Organismal Systems;Environmental Information Processing;Cellular Processes	Signal transduction;Immune system;Transport and catabolism	ko04151//PI3K-Akt signaling pathway;ko04020//Calcium signaling pathway;ko04650//Natural killer cell mediated cytotoxicity;ko04072//Phospholipase D signaling pathway;ko04145//Phagosome;ko04064//NF-kappa B signaling pathway;ko04666//Fc gamma R-mediated phagocytosis;ko04640//Hematopoietic cell lineage;ko04662//B cell receptor signaling pathway;ko04664//Fc epsilon RI signaling pathway;ko04672//Intest…	K06856	GO:0043227//membrane-bounded organelle;GO:0005576//extracellular region;GO:0043226//organelle;GO:0005615//extracellular space;GO:0071749//polymeric IgA immunoglobulin complex;GO:0071750//dimeric IgA immunoglobulin complex;GO:0019814//immunoglobulin complex;GO:0031982//vesicle;GO:0043234//protein complex;GO:0071746//IgA immunoglobulin complex, circulating;GO:0031988//membrane-bounded vesicle;GO:00…	GO:0005515//protein binding;GO:0005488//binding;GO:0005102//receptor binding	GO:0051707//response to other organism;GO:0003014//renal system process;GO:0009607//response to biotic stimulus;GO:0097205//renal filtration;GO:0051234//establishment of localization;GO:0051179//localization;GO:0050789//regulation of biological process;GO:0065007//biological regulation;GO:0006897//endocytosis;GO:0003008//system process;GO:0006810//transport;GO:0098542//defense response to other o…
TCONS_00063167	1491.38	112.13	27.3833	1.75667	-3.96239	1.39488e-05	0.000618196	yes	MYADM	XP_014957263.1 PREDICTED: myeloid-associated differentiation marker-like [Ovis aries]	-	-	-	-	-	-	-
TCONS_00063363	421.043	56.8767	21.9333	2.24	-3.29155	7.02813e-05	0.00244495	yes	CTSH	NP_001301092.1 pro-cathepsin H precursor [Capra hircus]	Cellular Processes	Transport and catabolism	ko04142//Lysosome	K01366	GO:0012505//endomembrane system;GO:0043226//organelle;GO:0005622//intracellular;GO:0030141//secretory granule;GO:0044444//cytoplasmic part;GO:0044424//intracellular part;GO:0016023//cytoplasmic, membrane-bounded vesicle;GO:0042599//lamellar body;GO:0031410//cytoplasmic vesicle;GO:0043227//membrane-bounded organelle;GO:0044421//extracellular region part;GO:0005773//vacuole;GO:0005623//cell;GO:0005…	GO:0016505//peptidase activator activity involved in apoptotic process;GO:0005488//binding;GO:0016787//hydrolase activity;GO:0032393//MHC class I receptor activity;GO:0004175//endopeptidase activity;GO:0099600//transmembrane receptor activity;GO:0098772//molecular function regulator;GO:0042562//hormone binding;GO:0060089//molecular transducer activity;GO:0016504//peptidase activator activity;GO:0…	GO:0031323//regulation of cellular metabolic process;GO:0010467//gene expression;GO:0071704//organic substance metabolic process;GO:0048518//positive regulation of biological process;GO:0032270//positive regulation of cellular protein metabolic process;GO:0061138//morphogenesis of a branching epithelium;GO:0043412//macromolecule modification;GO:0023014//signal transduction by protein phosphorylat…
TCONS_00063401	379.183	87.7833	3.86333	0.67	-2.52761	0.00185044	0.0342953	yes	TJP1	XP_014957438.1 PREDICTED: tight junction protein ZO-1 isoform X8 [Ovis aries]	Cellular Processes	Cellular commiunity	ko04530//Tight junction;ko04540//Gap junction;ko04520//Adherens junction	K05701	-	-	-
TCONS_00063963	0	338.853	0.001	5.62	12.4564	1.36622e-05	0.0006073	yes	HSP90AA1	NP_001012688.1 heat shock protein HSP 90-alpha [Bos taurus]	Environmental Information Processing;Organismal Systems;Genetic Information Processing	Endocrine system;Immune system;Signal transduction;Folding, sorting and degradation	ko04151//PI3K-Akt signaling pathway;ko04141//Protein processing in endoplasmic reticulum;ko04914//Progesterone-mediated oocyte maturation;ko04915//Estrogen signaling pathway;ko04612//Antigen processing and presentation;ko04621//NOD-like receptor signaling pathway	K04079	GO:0043229//intracellular organelle;GO:0031982//vesicle;GO:0043231//intracellular membrane-bounded organelle;GO:0031410//cytoplasmic vesicle;GO:0044464//cell part;GO:0016023//cytoplasmic, membrane-bounded vesicle;GO:0048770//pigment granule;GO:0043226//organelle;GO:0005622//intracellular;GO:0005737//cytoplasm;GO:0031988//membrane-bounded vesicle;GO:0016020//membrane;GO:0043227//membrane-bounded o…	GO:0003823//antigen binding;GO:0044877//macromolecular complex binding;GO:0001882//nucleoside binding;GO:0036094//small molecule binding;GO:1901363//heterocyclic compound binding;GO:0032549//ribonucleoside binding;GO:0005488//binding;GO:0032403//protein complex binding;GO:0046983//protein dimerization activity;GO:0016462//pyrophosphatase activity;GO:0023023//MHC protein complex binding;GO:0030234…	GO:0008152//metabolic process;GO:0044765//single-organism transport;GO:0070271//protein complex biogenesis;GO:0043933//macromolecular complex subunit organization;GO:0071822//protein complex subunit organization;GO:0046907//intracellular transport;GO:0006810//transport;GO:0016043//cellular component organization;GO:0009889//regulation of biosynthetic process;GO:0043623//cellular protein complex a…
TCONS_00064206	105.207	0	1.13333	0.001	-10.1464	0.00048732	0.0119893	yes	GOLGA4	XP_005695601.2 PREDICTED: golgin subfamily A member 4 isoform X2 [Capra hircus]	-	-	-	-	GO:0005622//intracellular;GO:0044464//cell part;GO:0043226//organelle;GO:0043229//intracellular organelle;GO:0043231//intracellular membrane-bounded organelle;GO:0043227//membrane-bounded organelle;GO:0044424//intracellular part;GO:0005623//cell	GO:0005488//binding;GO:0019899//enzyme binding;GO:0005515//protein binding	GO:0070727//cellular macromolecule localization;GO:0051234//establishment of localization;GO:0033036//macromolecule localization;GO:0034613//cellular protein localization;GO:0071702//organic substance transport;GO:0051649//establishment of localization in cell;GO:0008104//protein localization;GO:0046907//intracellular transport;GO:0015031//protein transport;GO:0045184//establishment of protein lo…
TCONS_00064382	32.5633	0	0.333333	0.001	-8.38082	0.00116566	0.0240176	yes	SNRK	XP_011978595.1 PREDICTED: SNF-related serine/threonine-protein kinase isoform X2 [Ovis aries musimon]	-	-	-	-	-	GO:0097159//organic cyclic compound binding;GO:0001882//nucleoside binding;GO:0004672//protein kinase activity;GO:0043169//cation binding;GO:0001883//purine nucleoside binding;GO:0046872//metal ion binding;GO:0032549//ribonucleoside binding;GO:1901363//heterocyclic compound binding;GO:0097367//carbohydrate derivative binding;GO:0032550//purine ribonucleoside binding;GO:0016740//transferase activi…	GO:0008152//metabolic process;GO:0006464//cellular protein modification process;GO:0019538//protein metabolic process;GO:0044260//cellular macromolecule metabolic process;GO:0044237//cellular metabolic process;GO:0043170//macromolecule metabolic process;GO:0043412//macromolecule modification;GO:0044238//primary metabolic process;GO:0071704//organic substance metabolic process;GO:0044267//cellular…
TCONS_00064842	459.58	113.803	19.2633	3.55333	-2.43861	0.000863097	0.0188727	yes	NT5DC2	XP_017922229.1 PREDICTED: 5'-nucleotidase domain-containing protein 2 [Capra hircus]	-	-	-	-	-	-	-
TCONS_00064857	213.4	37.0067	2.36667	0.296667	-2.99594	0.00119236	0.0244549	yes	TLR9	ACE88251.1 toll-like receptor 9 [Capra hircus]	Organismal Systems	Immune system	ko04620//Toll-like receptor signaling pathway	K10161	GO:0031982//vesicle;GO:0000323//lytic vacuole;GO:0005773//vacuole;GO:0031224//intrinsic component of membrane;GO:0043226//organelle;GO:0030139//endocytic vesicle;GO:0031090//organelle membrane;GO:0043229//intracellular organelle;GO:0045335//phagocytic vesicle;GO:0044424//intracellular part;GO:0043227//membrane-bounded organelle;GO:0044425//membrane part;GO:0044444//cytoplasmic part;GO:0016020//me…	GO:0004872//receptor activity;GO:0008329//signaling pattern recognition receptor activity;GO:0003676//nucleic acid binding;GO:0060089//molecular transducer activity;GO:0038023//signaling receptor activity;GO:0038187//pattern recognition receptor activity;GO:0005488//binding;GO:1901363//heterocyclic compound binding;GO:0004871//signal transducer activity;GO:0003723//RNA binding;GO:0097159//organic…	GO:0010468//regulation of gene expression;GO:0050896//response to stimulus;GO:0051249//regulation of lymphocyte activation;GO:0050865//regulation of cell activation;GO:0044699//single-organism process;GO:2001141//regulation of RNA biosynthetic process;GO:0048583//regulation of response to stimulus;GO:0065007//biological regulation;GO:0051716//cellular response to stimulus;GO:0006357//regulation o…
TCONS_00065152	508.91	102.893	7.79	1.03	-2.91898	0.000168095	0.00498134	yes	CCR1	XP_005696099.2 PREDICTED: C-C chemokine receptor type 1 [Capra hircus]	Organismal Systems;Environmental Information Processing	Immune system;Signaling molecules and interaction	ko04060//Cytokine-cytokine receptor interaction;ko04062//Chemokine signaling pathway	K04176	GO:0044425//membrane part;GO:0044459//plasma membrane part;GO:0005623//cell;GO:0071944//cell periphery;GO:0016021//integral component of membrane;GO:0031224//intrinsic component of membrane;GO:0005886//plasma membrane;GO:0016020//membrane;GO:0044464//cell part	GO:0008528//G-protein coupled peptide receptor activity;GO:0060089//molecular transducer activity;GO:0099600//transmembrane receptor activity;GO:0004871//signal transducer activity;GO:0016298//lipase activity;GO:0019956//chemokine binding;GO:0004950//chemokine receptor activity;GO:0001653//peptide receptor activity;GO:0004896//cytokine receptor activity;GO:0004888//transmembrane signaling recepto…	GO:0051246//regulation of protein metabolic process;GO:0050801//ion homeostasis;GO:0060255//regulation of macromolecule metabolic process;GO:0030003//cellular cation homeostasis;GO:0006875//cellular metal ion homeostasis;GO:0030278//regulation of ossification;GO:0050896//response to stimulus;GO:0072503//cellular divalent inorganic cation homeostasis;GO:0051270//regulation of cellular component mo…
TCONS_00065191	709.92	122.827	3.00667	0.376667	-2.9968	8.8426e-06	0.000416362	yes	Slc6a20	XP_017893813.1 PREDICTED: sodium- and chloride-dependent transporter XTRP3 isoform X1 [Capra hircus]	-	-	-	-	GO:0031224//intrinsic component of membrane;GO:0044425//membrane part;GO:0016020//membrane;GO:0016021//integral component of membrane	GO:0005342//organic acid transmembrane transporter activity;GO:0008509//anion transmembrane transporter activity;GO:0022892//substrate-specific transporter activity;GO:0022857//transmembrane transporter activity;GO:0022804//active transmembrane transporter activity;GO:0005326//neurotransmitter transporter activity;GO:0015075//ion transmembrane transporter activity;GO:0015291//secondary active tra…	GO:0006820//anion transport;GO:0071702//organic substance transport;GO:0015711//organic anion transport;GO:0006812//cation transport;GO:0051234//establishment of localization;GO:0046942//carboxylic acid transport;GO:0044765//single-organism transport;GO:0006811//ion transport;GO:0044699//single-organism process;GO:1902578//single-organism localization;GO:0051179//localization;GO:0006810//transpor…
TCONS_00065288	2310.96	380.62	21.28	2.81	-2.92086	5.48251e-05	0.00198764	yes	NUP210	XP_017893757.1 PREDICTED: LOW QUALITY PROTEIN: nuclear pore membrane glycoprotein 210 [Capra hircus]	Genetic Information Processing	Translation	ko03013//RNA transport	K14314	-	-	-
TCONS_00065440	353.227	0	3.10333	0.001	-11.5996	2.6643e-08	2.46691e-06	yes	CLASP2	XP_017922634.1 PREDICTED: CLIP-associating protein 2 isoform X13 [Capra hircus]	-	-	-	-	GO:0043226//organelle;GO:0015630//microtubule cytoskeleton;GO:0044424//intracellular part;GO:0043232//intracellular non-membrane-bounded organelle;GO:0044422//organelle part;GO:0005622//intracellular;GO:0005874//microtubule;GO:0099512//supramolecular fiber;GO:0044446//intracellular organelle part;GO:0005623//cell;GO:0044430//cytoskeletal part;GO:0044464//cell part;GO:0043229//intracellular organe…	GO:0005515//protein binding;GO:0008092//cytoskeletal protein binding;GO:0015631//tubulin binding;GO:0005488//binding	GO:0032886//regulation of microtubule-based process;GO:0010639//negative regulation of organelle organization;GO:0051493//regulation of cytoskeleton organization;GO:0044763//single-organism cellular process;GO:0033043//regulation of organelle organization;GO:0051179//localization;GO:0050794//regulation of cellular process;GO:0009987//cellular process;GO:0031110//regulation of microtubule polymeri…
TCONS_00065664	4397.32	1451.68	53.4933	13.5267	-1.98355	0.00251682	0.0434856	yes	EDEM1	XP_012026064.1 PREDICTED: ER degradation-enhancing alpha-mannosidase-like protein 1 isoform X2 [Ovis aries musimon]	Genetic Information Processing	Folding, sorting and degradation	ko04141//Protein processing in endoplasmic reticulum	K10084	GO:0042175//nuclear outer membrane-endoplasmic reticulum membrane network;GO:0005622//intracellular;GO:0043226//organelle;GO:0043231//intracellular membrane-bounded organelle;GO:0031090//organelle membrane;GO:0031227//intrinsic component of endoplasmic reticulum membrane;GO:0044446//intracellular organelle part;GO:0044444//cytoplasmic part;GO:0005789//endoplasmic reticulum membrane;GO:0044464//ce…	GO:0016798//hydrolase activity, acting on glycosyl bonds;GO:0003824//catalytic activity;GO:0015923//mannosidase activity;GO:0004559//alpha-mannosidase activity;GO:0046872//metal ion binding;GO:0005515//protein binding;GO:0016787//hydrolase activity;GO:0005488//binding;GO:0004553//hydrolase activity, hydrolyzing O-glycosyl compounds;GO:0043169//cation binding;GO:0043167//ion binding;GO:0015924//ma…	GO:0006508//proteolysis;GO:0050790//regulation of catalytic activity;GO:0071310//cellular response to organic substance;GO:0065007//biological regulation;GO:0031325//positive regulation of cellular metabolic process;GO:0019222//regulation of metabolic process;GO:0070887//cellular response to chemical stimulus;GO:0050794//regulation of cellular process;GO:0071704//organic substance metabolic proce…
TCONS_00066168	1766.05	538.707	59.34	13.41	-2.1457	0.000496903	0.012201	yes	GNAI2	XP_008574984.1 PREDICTED: guanine nucleotide-binding protein G(i) subunit alpha-2 isoform X2 [Galeopterus variegatus]	Environmental Information Processing;Cellular Processes;Organismal Systems	Environmental adaptation;Nervous system;Signal transduction;Endocrine system;Development;Cellular commiunity;Immune system;Digestive system;Circulatory system	ko04015//Rap1 signaling pathway;ko04024//cAMP signaling pathway;ko04062//Chemokine signaling pathway;ko04921//Oxytocin signaling pathway;ko04022//cGMP - PKG signaling pathway;ko04261//Adrenergic signaling in cardiomyocytes;ko04530//Tight junction;ko04360//Axon guidance;ko04728//Dopaminergic synapse;ko04611//Platelet activation;ko04670//Leukocyte transendothelial migration;ko04724//Glutamatergic s…	K04630	-	-	-
TCONS_00066245	60.1267	0	1.60667	0.001	-10.6499	0.000130418	0.00409024	yes	ATRIP	XP_017922513.1 PREDICTED: ATR-interacting protein isoform X3 [Capra hircus]	Genetic Information Processing	Replication and repair	ko03460//Fanconi anemia pathway	K10905	GO:0005622//intracellular;GO:0044464//cell part;GO:0044424//intracellular part;GO:0005623//cell;GO:0043228//non-membrane-bounded organelle;GO:0043229//intracellular organelle;GO:0005856//cytoskeleton;GO:0043226//organelle;GO:0043232//intracellular non-membrane-bounded organelle	GO:0005515//protein binding;GO:0005488//binding;GO:0032182//ubiquitin-like protein binding;GO:0031593//polyubiquitin binding;GO:0043130//ubiquitin binding	-
TCONS_00066255	161.217	0	22.6733	0.001	-14.4687	0.000148871	0.00453514	yes	CATHL1A	XP_017893968.1 PREDICTED: cathelicidin-1 [Capra hircus]	Organismal Systems	Digestive system	ko04970//Salivary secretion	K13916	-	-	GO:0051704//multi-organism process;GO:0009617//response to bacterium;GO:0051707//response to other organism;GO:0009607//response to biotic stimulus;GO:0006950//response to stress;GO:0050896//response to stimulus;GO:0043207//response to external biotic stimulus;GO:0009605//response to external stimulus
TCONS_00066308	149.157	1.70333	3.67333	0.0333333	-6.78398	2.4261e-05	0.000988808	yes	PTH1R	XP_017922222.1 PREDICTED: parathyroid hormone/parathyroid hormone-related peptide receptor isoform X3 [Capra hircus]	Environmental Information Processing;Organismal Systems	Excretory system;Signaling molecules and interaction	ko04080//Neuroactive ligand-receptor interaction;ko04961//Endocrine and other factor-regulated calcium reabsorption	K04585	GO:0016020//membrane;GO:0005623//cell;GO:0016021//integral component of membrane;GO:0031224//intrinsic component of membrane;GO:0044425//membrane part;GO:0043226//organelle;GO:0031988//membrane-bounded vesicle;GO:0043227//membrane-bounded organelle;GO:0031982//vesicle;GO:0044464//cell part	GO:0060089//molecular transducer activity;GO:0005515//protein binding;GO:0099600//transmembrane receptor activity;GO:0038023//signaling receptor activity;GO:0004872//receptor activity;GO:0042277//peptide binding;GO:0004888//transmembrane signaling receptor activity;GO:0033218//amide binding;GO:0004871//signal transducer activity;GO:0005488//binding;GO:0004930//G-protein coupled receptor activity	GO:0007187//G-protein coupled receptor signaling pathway, coupled to cyclic nucleotide second messenger;GO:0007188//adenylate cyclase-modulating G-protein coupled receptor signaling pathway;GO:0007154//cell communication;GO:0055080//cation homeostasis;GO:0006875//cellular metal ion homeostasis;GO:0055065//metal ion homeostasis;GO:0050789//regulation of biological process;GO:0001503//ossification;…
TCONS_00067050	551.59	0	77.9233	0.001	-16.2498	5.61299e-13	1.7893e-10	yes	Prss16	XP_005696783.2 PREDICTED: thymus-specific serine protease [Capra hircus]	-	-	-	-	GO:0043226//organelle;GO:0043231//intracellular membrane-bounded organelle;GO:0005622//intracellular;GO:0043227//membrane-bounded organelle;GO:0044464//cell part;GO:0043229//intracellular organelle;GO:0005623//cell;GO:0044424//intracellular part	GO:0003824//catalytic activity;GO:0070011//peptidase activity, acting on L-amino acid peptides;GO:0008233//peptidase activity;GO:0016787//hydrolase activity	GO:0043170//macromolecule metabolic process;GO:0044238//primary metabolic process;GO:0071704//organic substance metabolic process;GO:0019538//protein metabolic process;GO:0008152//metabolic process
TCONS_00067513	408.99	82.9167	4.07667	0.6	-2.76436	0.000497018	0.012201	yes	TRERF1	XP_017894580.1 PREDICTED: transcriptional-regulating factor 1 isoform X2 [Capra hircus]	-	-	-	-	GO:0043226//organelle;GO:0044424//intracellular part;GO:0005623//cell;GO:0005622//intracellular;GO:0044464//cell part;GO:0043227//membrane-bounded organelle;GO:0043231//intracellular membrane-bounded organelle;GO:0043229//intracellular organelle	GO:0043167//ion binding;GO:0005488//binding;GO:0043169//cation binding	-
TCONS_00067746	340.5	76.6667	6.43	0.98	-2.71397	0.000597697	0.0141585	yes	HLA-DOA	XP_019840797.1 PREDICTED: HLA class II histocompatibility antigen, DO alpha chain-like isoform X1 [Bos indicus]	Cellular Processes;Environmental Information Processing;Organismal Systems	Transport and catabolism;Immune system;Signaling molecules and interaction	ko04514//Cell adhesion molecules (CAMs);ko04145//Phagosome;ko04612//Antigen processing and presentation;ko04672//Intestinal immune network for IgA production	K06752	GO:0043234//protein complex;GO:0005623//cell;GO:0071944//cell periphery;GO:0044464//cell part;GO:0032991//macromolecular complex;GO:0044425//membrane part;GO:0016020//membrane;GO:0098796//membrane protein complex;GO:0098797//plasma membrane protein complex;GO:0042611//MHC protein complex;GO:0031224//intrinsic component of membrane;GO:0044459//plasma membrane part;GO:0005886//plasma membrane	GO:0032403//protein complex binding;GO:0005515//protein binding;GO:0003823//antigen binding;GO:0044877//macromolecular complex binding;GO:0005488//binding;GO:0023023//MHC protein complex binding	GO:0019884//antigen processing and presentation of exogenous antigen;GO:1902105//regulation of leukocyte differentiation;GO:0002376//immune system process;GO:0050789//regulation of biological process;GO:0002694//regulation of leukocyte activation;GO:0019882//antigen processing and presentation;GO:0051249//regulation of lymphocyte activation;GO:0048002//antigen processing and presentation of pepti…
TCONS_00068193	381.01	0	4.96	0.001	-12.2761	3.09297e-14	1.3667e-11	yes	FAM65B	XP_012018494.1 PREDICTED: protein FAM65B isoform X1 [Ovis aries musimon]	-	-	-	-	GO:0044464//cell part;GO:0098590//plasma membrane region;GO:0031528//microvillus membrane;GO:0005902//microvillus;GO:0005886//plasma membrane;GO:0098858//actin-based cell projection;GO:0098805//whole membrane;GO:0044425//membrane part;GO:0042995//cell projection;GO:0098589//membrane region;GO:0071944//cell periphery;GO:0005622//intracellular;GO:0044459//plasma membrane part;GO:0044424//intracellu…	-	GO:0032501//multicellular organismal process;GO:0003008//system process;GO:0050877//neurological system process;GO:0050954//sensory perception of mechanical stimulus;GO:0007600//sensory perception
TCONS_00068271	5570.46	261.29	216.943	8.47333	-4.67824	3.2837e-06	0.000174255	yes	HIST1H1C	XP_017893999.1 PREDICTED: histone H1.2 [Capra hircus]	-	-	-	-	GO:0044464//cell part;GO:0000790//nuclear chromatin;GO:0044422//organelle part;GO:0044454//nuclear chromosome part;GO:0070013//intracellular organelle lumen;GO:0043229//intracellular organelle;GO:0032991//macromolecular complex;GO:0031981//nuclear lumen;GO:0031974//membrane-enclosed lumen;GO:0005623//cell;GO:0000785//chromatin;GO:0043232//intracellular non-membrane-bounded organelle;GO:0005622//i…	GO:0003682//chromatin binding;GO:0005488//binding;GO:0044877//macromolecular complex binding;GO:0097159//organic cyclic compound binding;GO:1901363//heterocyclic compound binding;GO:0003676//nucleic acid binding;GO:0003723//RNA binding	GO:0034728//nucleosome organization;GO:0043933//macromolecular complex subunit organization;GO:0006325//chromatin organization;GO:0051276//chromosome organization;GO:0006996//organelle organization;GO:0016043//cellular component organization;GO:0071824//protein-DNA complex subunit organization;GO:0071822//protein complex subunit organization;GO:0071840//cellular component organization or biogenes…
TCONS_00068422	4449.88	1711.54	57.9867	14.4667	-2.00299	0.00262678	0.0448472	yes	-	XP_005696669.2 PREDICTED: BOLA class I histocompatibility antigen, alpha chain BL3-7-like isoform X2 [Capra hircus]	Cellular Processes;Environmental Information Processing;Organismal Systems	Transport and catabolism;Immune system;Signaling molecules and interaction	ko04144//Endocytosis;ko04514//Cell adhesion molecules (CAMs);ko04650//Natural killer cell mediated cytotoxicity;ko04145//Phagosome;ko04612//Antigen processing and presentation	K06751	-	-	-
TCONS_00068432	1979.32	93.0733	31.6433	1.22	-4.69695	1.49601e-08	1.48039e-06	yes	PPP1R18	XP_017894344.1 PREDICTED: LOW QUALITY PROTEIN: phostensin [Capra hircus]	-	-	-	-	GO:0043228//non-membrane-bounded organelle;GO:0005622//intracellular;GO:0005623//cell;GO:0043229//intracellular organelle;GO:0044464//cell part;GO:0043226//organelle;GO:0043232//intracellular non-membrane-bounded organelle;GO:0044424//intracellular part	GO:0005488//binding;GO:0005515//protein binding;GO:0008092//cytoskeletal protein binding	-
[truncated: 2,155 more rows]
