# Supplementary material for: Transcriptome analysis reveals potential immune function-related regulatory genes/pathways of female Lubo goat submandibular glands at different developmental stages
Source: PeerJ. 2020 Oct 7;8:e9947. doi: 10.7717/peerj.9947 (PMC7547598; doi:10.7717/peerj.9947)
Supplement: Table S4 — A1-L, A2-L, A3-L were the samples for goats of 1-month-old (group A), C2-L, C3-L, C5-L were the samples for goats of 24-month-old (group C). [file peerj-08-9947-s004.xlsx]

## Sheet: peerj-45161-Table_S5
id	A_count	C_count	A_fpkm	C_fpkm	log2(FC)	Pvalue	FDR	significant	Symbol	Description	KEGG_A_class	KEGG_B_class	Pathway	K_ID	GO Component	GO Function	GO Process
NM_001285538.1	612.833	81.2633	16.6867	1.42333	-3.55135	0.00238581	0.0439902	yes	ncbi_100861185	-	-	-	-	-	-	-	-
NM_001285545.1	1555.38	0	162.88	0.001	-17.3134	6.80071e-09	9.67092e-07	yes	ncbi_100861191	Bac7.5 protein precursor [Capra hircus]	Organismal Systems;Human Diseases	Digestive system;Infectious diseases	ko05152//Tuberculosis;ko04970//Salivary secretion	K13916	-	-	GO:0051704//multi-organism process;GO:0006950//response to stress;GO:0051707//response to other organism;GO:0050896//response to stimulus;GO:0009607//response to biotic stimulus;GO:0009605//response to external stimulus;GO:0009617//response to bacterium;GO:0043207//response to external biotic stimulus
NM_001285546.1	336.237	0	50.45	0.001	-15.6226	9.53437e-07	7.13235e-05	yes	ncbi_100861192	MAP28 protein precursor [Capra hircus]	Human Diseases;Organismal Systems	Infectious diseases;Digestive system	ko05152//Tuberculosis;ko04970//Salivary secretion	K13916	-	-	GO:0050896//response to stimulus;GO:0051707//response to other organism;GO:0001906//cell killing;GO:0009605//response to external stimulus;GO:0009607//response to biotic stimulus;GO:0043207//response to external biotic stimulus;GO:0006950//response to stress;GO:0009617//response to bacterium;GO:0051704//multi-organism process;GO:0009620//response to fungus
NM_001285577.1	372.323	0.356667	46.6033	0.0266667	-10.7712	1.67966e-08	2.07096e-06	yes	ncbi_100861213	cathelicidin-2 precursor [Capra hircus]	Organismal Systems;Human Diseases	Digestive system;Infectious diseases	ko05152//Tuberculosis;ko04970//Salivary secretion	K13916	-	-	GO:0051707//response to other organism;GO:0009605//response to external stimulus;GO:0043207//response to external biotic stimulus;GO:0051704//multi-organism process;GO:0050896//response to stimulus;GO:0009607//response to biotic stimulus;GO:0009617//response to bacterium;GO:0006950//response to stress
NM_001285587.1	12.0267	434.59	1.23333	22.7833	4.20734	0.00156066	0.031821	yes	ncbi_100861231	kappa-casein precursor [Capra hircus]	-	-	-	-	GO:0005576//extracellular region;GO:0044421//extracellular region part	-	GO:0044699//single-organism process;GO:1902578//single-organism localization;GO:0050878//regulation of body fluid levels;GO:0065008//regulation of biological quality;GO:0007589//body fluid secretion;GO:0031647//regulation of protein stability;GO:0046903//secretion;GO:0006810//transport;GO:0051234//establishment of localization;GO:0044765//single-organism transport;GO:0051179//localization;GO:0065…
NM_001285620.1	619.113	0	43.3167	0.001	-15.4026	1.94348e-07	1.72663e-05	yes	ncbi_100861275	MAP34-B protein precursor [Capra hircus]	Organismal Systems;Human Diseases	Digestive system;Infectious diseases	ko05152//Tuberculosis;ko04970//Salivary secretion	K13916	-	-	GO:0009607//response to biotic stimulus;GO:0043207//response to external biotic stimulus;GO:0009617//response to bacterium;GO:0051704//multi-organism process;GO:0050896//response to stimulus;GO:0006950//response to stress;GO:0009605//response to external stimulus;GO:0051707//response to other organism
NM_001285628.1	549.27	82.4767	14.62	1.29333	-3.49878	1.77205e-05	0.000864847	yes	ncbi_100861282	elongation of very long chain fatty acids protein 5 [Capra hircus]	Metabolism	Lipid metabolism;Global and Overview	ko01212//Fatty acid metabolism;ko00062//Fatty acid elongation;ko01040//Biosynthesis of unsaturated fatty acids	K10244	GO:0043231//intracellular membrane-bounded organelle;GO:0031224//intrinsic component of membrane;GO:0044464//cell part;GO:0042995//cell projection;GO:0097458//neuron part;GO:0044297//cell body;GO:0016020//membrane;GO:0043005//neuron projection;GO:0043226//organelle;GO:0043227//membrane-bounded organelle;GO:0044425//membrane part;GO:0044424//intracellular part;GO:0005622//intracellular;GO:0005623/…	GO:0004312//fatty acid synthase activity;GO:0003824//catalytic activity;GO:0016746//transferase activity, transferring acyl groups;GO:0016747//transferase activity, transferring acyl groups other than amino-acyl groups;GO:0016740//transferase activity	GO:0043436//oxoacid metabolic process;GO:0006633//fatty acid biosynthetic process;GO:0019368//fatty acid elongation, unsaturated fatty acid;GO:0016053//organic acid biosynthetic process;GO:0071704//organic substance metabolic process;GO:0044699//single-organism process;GO:0000038//very long-chain fatty acid metabolic process;GO:0006082//organic acid metabolic process;GO:1901576//organic substance…
NM_001285660.1	291.677	41.4133	12.2033	1.07	-3.51159	0.000213814	0.00667849	yes	ncbi_100861310	-	-	-	-	-	-	-	-
NM_001285726.1	546.833	27.12	33.5433	1.12667	-4.89589	3.03955e-06	0.000188164	yes	ncbi_100861389	signaling lymphocytic activation molecule precursor [Capra hircus]	Human Diseases	Infectious diseases	ko05162//Measles	K06536	GO:0071944//cell periphery;GO:0043229//intracellular organelle;GO:0044459//plasma membrane part;GO:0044444//cytoplasmic part;GO:0005886//plasma membrane;GO:0031410//cytoplasmic vesicle;GO:0016023//cytoplasmic, membrane-bounded vesicle;GO:0031982//vesicle;GO:0044464//cell part;GO:0043227//membrane-bounded organelle;GO:0005737//cytoplasm;GO:0044424//intracellular part;GO:0031224//intrinsic componen…	-	GO:0051128//regulation of cellular component organization;GO:0065007//biological regulation;GO:0001775//cell activation;GO:0044699//single-organism process;GO:0044763//single-organism cellular process;GO:0050789//regulation of biological process;GO:0002376//immune system process;GO:0009987//cellular process;GO:0033043//regulation of organelle organization;GO:0019222//regulation of metabolic proce…
NM_001285730.1	0	66.09	0.001	2.53667	11.3087	0.00166344	0.0335022	yes	ncbi_100861392	-	-	-	-	-	-	-	-
NM_001285741.1	1276.45	49.2667	55.95	1.43333	-5.28669	8.78272e-10	1.72973e-07	yes	ncbi_100860892	solute carrier family 2, facilitated glucose transporter member 3 [Ovis aries]	-	-	-	-	GO:0044464//cell part;GO:0005622//intracellular;GO:0031224//intrinsic component of membrane;GO:0044424//intracellular part;GO:0044425//membrane part;GO:0016020//membrane;GO:0005623//cell	GO:0051183//vitamin transporter activity;GO:0015144//carbohydrate transmembrane transporter activity;GO:0022857//transmembrane transporter activity;GO:0015149//hexose transmembrane transporter activity;GO:1901476//carbohydrate transporter activity;GO:0022891//substrate-specific transmembrane transporter activity;GO:0005215//transporter activity;GO:0022892//substrate-specific transporter activity;…	GO:0015711//organic anion transport;GO:1902578//single-organism localization;GO:0051234//establishment of localization;GO:0008643//carbohydrate transport;GO:0006810//transport;GO:0015749//monosaccharide transport;GO:0044763//single-organism cellular process;GO:0006811//ion transport;GO:0006820//anion transport;GO:0009987//cellular process;GO:0071702//organic substance transport;GO:0008645//hexose…
NM_001285746.1	1991.99	2.34	109.783	0.0866667	-10.3069	2.03469e-15	1.84825e-12	yes	ncbi_100860901	-	-	-	-	-	-	-	-
NM_001285769.1	3867.5	192.653	110.96	3.66333	-4.92074	2.02734e-09	3.50365e-07	yes	ncbi_100860919	-	-	-	-	-	-	-	-
NM_001291297.1	262.34	23.1067	2.86	0.15	-4.25298	3.80848e-05	0.00163931	yes	ncbi_102183389	retrotransposon-derived protein PEG10 isoform 3 [Capra hircus]	-	-	-	-	-	GO:0043169//cation binding;GO:0043167//ion binding;GO:0046914//transition metal ion binding;GO:0005488//binding;GO:0046872//metal ion binding	-
NM_001291298.1	262.34	23.1067	2.86	0.15	-4.25298	3.81193e-05	0.00163931	yes	ncbi_102183389	-	-	-	-	-	-	-	-
NM_001291299.1	967.58	157.117	10.2633	1.04667	-3.29363	8.81016e-06	0.00047214	yes	ncbi_102183389	-	-	-	-	-	-	-	-
NM_001291300.1	967.58	157.117	10.2633	1.04667	-3.29363	8.81484e-06	0.00047214	yes	ncbi_102183389	-	-	-	-	-	-	-	-
NM_001314163.1	479.067	96.63	30.42	4.02	-2.91975	0.000710219	0.0172343	yes	ncbi_102170638	pro-cathepsin H precursor [Capra hircus]	Cellular Processes	Transport and catabolism	ko04142//Lysosome	K01366	GO:0005623//cell;GO:0043229//intracellular organelle;GO:0000323//lytic vacuole;GO:0044464//cell part;GO:0005576//extracellular region;GO:0005622//intracellular;GO:0012505//endomembrane system;GO:0043231//intracellular membrane-bounded organelle;GO:0030141//secretory granule;GO:0099503//secretory vesicle;GO:0005773//vacuole;GO:0005737//cytoplasm;GO:0043226//organelle;GO:0043227//membrane-bounded o…	GO:0070011//peptidase activity, acting on L-amino acid peptides;GO:0042562//hormone binding;GO:0005488//binding;GO:0030234//enzyme regulator activity;GO:0060089//molecular transducer activity;GO:0038023//signaling receptor activity;GO:0061134//peptidase regulator activity;GO:0003824//catalytic activity;GO:0098772//molecular function regulator;GO:0032393//MHC class I receptor activity;GO:0099600//…	GO:0045862//positive regulation of proteolysis;GO:0023056//positive regulation of signaling;GO:0019222//regulation of metabolic process;GO:0043281//regulation of cysteine-type endopeptidase activity involved in apoptotic process;GO:0043068//positive regulation of programmed cell death;GO:0080090//regulation of primary metabolic process;GO:0030334//regulation of cell migration;GO:1901565//organoni…
NM_001314219.1	403.733	44.8633	32.03	1.89333	-4.08042	4.76744e-05	0.00198131	yes	ncbi_102174541	insulin-like growth factor-binding protein 3 precursor [Capra hircus]	Cellular Processes;Human Diseases	Cancers;Cell growth and death	ko05202//Transcriptional misregulation in cancers;ko04115//p53 signaling pathway	K10138	-	-	-
NM_001314269.1	219.76	3.98667	7.13667	0.0733333	-6.60464	3.43131e-06	0.000207229	yes	ncbi_102168469	PREDICTED: matrix metalloproteinase-9 [Ovis aries musimon]	Environmental Information Processing;Organismal Systems;Human Diseases	Cancers;Infectious diseases;Signal transduction;Immune system;Endocrine system	ko05200//Pathways in cancer;ko05205//Proteoglycans in cancer;ko04670//Leukocyte transendothelial migration;ko05202//Transcriptional misregulation in cancers;ko04668//TNF signaling pathway;ko05161//Hepatitis B;ko04915//Estrogen signaling pathway;ko05206//MicroRNAs in cancer;ko05219//Bladder cancer	K01403	GO:0031988//membrane-bounded vesicle;GO:0043226//organelle;GO:0031982//vesicle;GO:0043227//membrane-bounded organelle;GO:0031012//extracellular matrix;GO:0044421//extracellular region part;GO:0005576//extracellular region	GO:0016787//hydrolase activity;GO:0005488//binding;GO:0043169//cation binding;GO:0005515//protein binding;GO:0003824//catalytic activity;GO:0046872//metal ion binding;GO:0046914//transition metal ion binding;GO:0070011//peptidase activity, acting on L-amino acid peptides;GO:0004175//endopeptidase activity;GO:0043167//ion binding;GO:0008233//peptidase activity	GO:2000145//regulation of cell motility;GO:0010632//regulation of epithelial cell migration;GO:0032412//regulation of ion transmembrane transporter activity;GO:0032410//negative regulation of transporter activity;GO:0044092//negative regulation of molecular function;GO:0065009//regulation of molecular function;GO:0044707//single-multicellular organism process;GO:0032501//multicellular organismal …
NM_001314287.1	233.13	13.0367	13.77	0.513333	-4.74549	0.000197965	0.00629387	yes	ncbi_102187190	aldoketoreductase 1B5 [Capra hircus]	Metabolism	Lipid metabolism;Carbohydrate metabolism	ko00561//Glycerolipid metabolism;ko00051//Fructose and mannose metabolism;ko00040//Pentose and glucuronate interconversions;ko00052//Galactose metabolism	K00011	GO:0005623//cell;GO:0044464//cell part;GO:0005622//intracellular;GO:0044424//intracellular part	GO:0033764//steroid dehydrogenase activity, acting on the CH-OH group of donors, NAD or NADP as acceptor;GO:0004033//aldo-keto reductase (NADP) activity;GO:0008106//alcohol dehydrogenase (NADP+) activity;GO:0016229//steroid dehydrogenase activity;GO:0016491//oxidoreductase activity;GO:0016614//oxidoreductase activity, acting on CH-OH group of donors;GO:0003824//catalytic activity;GO:0016616//oxid…	GO:0044699//single-organism process;GO:0008152//metabolic process;GO:0044710//single-organism metabolic process
NM_001314325.1	71.5633	0	1.81	0.001	-10.8218	0.00100421	0.0228049	yes	ncbi_102170590	forkhead box protein M1 [Capra hircus]	-	-	-	-	-	-	-
TCONS_00000202	411.373	0	2.62667	0.001	-11.359	4.66164e-14	2.81617e-11	yes	CFDP2	KHJ39844.1 endonuclease/exonuclease/phosphatase family protein [Trichuris suis]	-	-	-	-	-	-	-
TCONS_00001255	148.713	0	1.87333	0.001	-10.8714	2.51318e-07	2.16786e-05	yes	TOPBP1	XP_005675612.2 PREDICTED: DNA topoisomerase 2-binding protein 1 isoform X1 [Capra hircus]	-	-	-	-	GO:0070013//intracellular organelle lumen;GO:0043232//intracellular non-membrane-bounded organelle;GO:0044422//organelle part;GO:0043227//membrane-bounded organelle;GO:0031974//membrane-enclosed lumen;GO:0005654//nucleoplasm;GO:0005634//nucleus;GO:0043073//germ cell nucleus;GO:0043229//intracellular organelle;GO:0016020//membrane;GO:0043226//organelle;GO:0005623//cell;GO:0043228//non-membrane-bou…	GO:0005515//protein binding;GO:0005488//binding	GO:0051716//cellular response to stimulus;GO:0009628//response to abiotic stimulus;GO:0050896//response to stimulus;GO:0009987//cellular process;GO:0033554//cellular response to stress;GO:0006950//response to stress;GO:0009314//response to radiation
TCONS_00001259	411.02	101.33	8.63667	1.30667	-2.72458	0.00117868	0.0256333	yes	TOPBP1	XP_005675612.2 PREDICTED: DNA topoisomerase 2-binding protein 1 isoform X1 [Capra hircus]	-	-	-	-	GO:0044451//nucleoplasm part;GO:0031981//nuclear lumen;GO:0005654//nucleoplasm;GO:0043233//organelle lumen;GO:0031974//membrane-enclosed lumen;GO:0005634//nucleus;GO:0016604//nuclear body;GO:0044424//intracellular part;GO:0043227//membrane-bounded organelle;GO:0043231//intracellular membrane-bounded organelle;GO:0044428//nuclear part;GO:0016020//membrane;GO:0005622//intracellular;GO:0044422//orga…	GO:0005515//protein binding;GO:0005488//binding	GO:0009628//response to abiotic stimulus;GO:0009987//cellular process;GO:0009314//response to radiation;GO:0033554//cellular response to stress;GO:0051716//cellular response to stimulus;GO:0006950//response to stress;GO:0050896//response to stimulus
TCONS_00002646	225.7	1.14	2.41667	0.00666667	-8.50184	4.96583e-07	3.98251e-05	yes	SKIL	XP_017903349.1 PREDICTED: ski-like protein isoform X1 [Capra hircus]	Cellular Processes	Cellular commiunity	ko04550//Signaling pathways regulating pluripotency of stem cells	K18499	-	-	-
TCONS_00003000	633.483	13.1767	8.24	0.113333	-6.184	6.09984e-09	8.84377e-07	yes	IL20RB	XP_005675586.1 PREDICTED: interleukin-20 receptor subunit beta isoform X1 [Capra hircus]	Environmental Information Processing	Signaling molecules and interaction;Signal transduction	ko04060//Cytokine-cytokine receptor interaction;ko04630//Jak-STAT signaling pathway	K05137	-	GO:0005515//protein binding;GO:0005488//binding;GO:0019955//cytokine binding	GO:0006950//response to stress;GO:0048518//positive regulation of biological process;GO:0023052//signaling;GO:0001894//tissue homeostasis;GO:0002694//regulation of leukocyte activation;GO:0032944//regulation of mononuclear cell proliferation;GO:0034110//regulation of homotypic cell-cell adhesion;GO:0048519//negative regulation of biological process;GO:0050896//response to stimulus;GO:0060249//ana…
TCONS_00003048	93.8633	4.12667	9.23333	0.263333	-5.13189	0.00115533	0.0252696	yes	BFSP2	XP_019817862.1 PREDICTED: phakinin isoform X2 [Bos indicus]	-	-	-	-	GO:0043234//protein complex;GO:0044464//cell part;GO:0043232//intracellular non-membrane-bounded organelle;GO:0005623//cell;GO:0043229//intracellular organelle;GO:0043226//organelle;GO:0044424//intracellular part;GO:0043228//non-membrane-bounded organelle;GO:0032991//macromolecular complex;GO:0005622//intracellular;GO:0016020//membrane	GO:0005198//structural molecule activity	GO:0060429//epithelium development;GO:0032502//developmental process;GO:0044767//single-organism developmental process;GO:0048468//cell development;GO:0007010//cytoskeleton organization;GO:0009888//tissue development;GO:0009987//cellular process;GO:0044763//single-organism cellular process;GO:0016043//cellular component organization;GO:0048856//anatomical structure development;GO:0021700//develop…
TCONS_00003083	1862.09	553.55	7.43333	1.24667	-2.57593	0.000920803	0.0212137	yes	BRWD1	XP_017906996.1 PREDICTED: bromodomain and WD repeat-containing protein 1 [Capra hircus]	-	-	-	-	-	-	-
TCONS_00003096	50.7033	0	0.74	0.001	-9.53138	0.00111213	0.0245696	yes	DSCAM	XP_017907105.1 PREDICTED: Down syndrome cell adhesion molecule [Capra hircus]	-	-	-	-	GO:0043005//neuron projection;GO:0005623//cell;GO:0097458//neuron part;GO:0042995//cell projection;GO:0044464//cell part	-	GO:0045927//positive regulation of growth;GO:0048666//neuron development;GO:0031344//regulation of cell projection organization;GO:0010976//positive regulation of neuron projection development;GO:0048639//positive regulation of developmental growth;GO:0032535//regulation of cellular component size;GO:0051094//positive regulation of developmental process;GO:0050789//regulation of biological proces…
TCONS_00003207	435.29	37.1633	7.04	0.393333	-4.16175	3.73916e-05	0.00161897	yes	ITGB2	XP_017903465.1 PREDICTED: integrin beta-2 isoform X1 [Capra hircus]	Cellular Processes;Environmental Information Processing;Organismal Systems	Transport and catabolism;Immune system;Cell motility;Signal transduction;Signaling molecules and interaction	ko04810//Regulation of actin cytoskeleton;ko04015//Rap1 signaling pathway;ko04514//Cell adhesion molecules (CAMs);ko04650//Natural killer cell mediated cytotoxicity;ko04390//Hippo signaling pathway;ko04145//Phagosome;ko04670//Leukocyte transendothelial migration	K06464	GO:0071944//cell periphery;GO:0043227//membrane-bounded organelle;GO:0016020//membrane;GO:0044459//plasma membrane part;GO:0043235//receptor complex;GO:0098802//plasma membrane receptor complex;GO:0032991//macromolecular complex;GO:0043226//organelle;GO:0044425//membrane part;GO:0098796//membrane protein complex;GO:0031988//membrane-bounded vesicle;GO:0008305//integrin complex;GO:0098797//plasma …	GO:0043169//cation binding;GO:0060089//molecular transducer activity;GO:0099600//transmembrane receptor activity;GO:0005515//protein binding;GO:0038023//signaling receptor activity;GO:0004871//signal transducer activity;GO:0004872//receptor activity;GO:0005488//binding;GO:0004888//transmembrane signaling receptor activity;GO:0019900//kinase binding;GO:0019899//enzyme binding;GO:0043167//ion bindi…	GO:0051179//localization;GO:0040011//locomotion;GO:0051716//cellular response to stimulus;GO:0016477//cell migration;GO:0007154//cell communication;GO:0031399//regulation of protein modification process;GO:0050789//regulation of biological process;GO:0034613//cellular protein localization;GO:0071621//granulocyte chemotaxis;GO:0044707//single-multicellular organism process;GO:0044802//single-organ…
TCONS_00003244	1664.23	8.47667	14.9467	0.05	-8.22368	5.76529e-12	2.13844e-09	yes	RUNX1	XP_011986058.1 PREDICTED: runt-related transcription factor 1 isoform X2 [Ovis aries musimon]	-	-	-	-	-	-	-
TCONS_00003422	1006.11	196.34	30.7733	3.86333	-2.99376	0.000105658	0.00383906	yes	SATB1	XP_012009567.1 PREDICTED: DNA-binding protein SATB1 isoform X3 [Ovis aries musimon]	-	-	-	-	GO:0070013//intracellular organelle lumen;GO:0005654//nucleoplasm;GO:0031974//membrane-enclosed lumen;GO:0032991//macromolecular complex;GO:0043231//intracellular membrane-bounded organelle;GO:0031981//nuclear lumen;GO:0043232//intracellular non-membrane-bounded organelle;GO:0043228//non-membrane-bounded organelle;GO:0043227//membrane-bounded organelle;GO:0044427//chromosomal part;GO:0000785//chr…	GO:0005488//binding;GO:0097159//organic cyclic compound binding;GO:0003676//nucleic acid binding;GO:0044212//transcription regulatory region DNA binding;GO:0003700//transcription factor activity, sequence-specific DNA binding;GO:1990837//sequence-specific double-stranded DNA binding;GO:0043565//sequence-specific DNA binding;GO:0001067//regulatory region nucleic acid binding;GO:0000976//transcript…	GO:0012501//programmed cell death;GO:0044260//cellular macromolecule metabolic process;GO:0036211//protein modification process;GO:0044267//cellular protein metabolic process;GO:0019219//regulation of nucleobase-containing compound metabolic process;GO:0010556//regulation of macromolecule biosynthetic process;GO:0006357//regulation of transcription from RNA polymerase II promoter;GO:0051171//regu…
TCONS_00003647	151.613	2.08333	1.60667	0.0133333	-6.91289	0.000265619	0.00793471	yes	Grhl3	XP_005676903.1 PREDICTED: grainyhead-like protein 3 homolog [Capra hircus]	-	-	-	-	GO:0043229//intracellular organelle;GO:0044424//intracellular part;GO:0043231//intracellular membrane-bounded organelle;GO:0005622//intracellular;GO:0043226//organelle;GO:0005623//cell;GO:0044464//cell part;GO:0043227//membrane-bounded organelle	GO:0097159//organic cyclic compound binding;GO:0005488//binding;GO:0003676//nucleic acid binding;GO:1901363//heterocyclic compound binding	GO:2001141//regulation of RNA biosynthetic process;GO:0010556//regulation of macromolecule biosynthetic process;GO:0009987//cellular process;GO:0050789//regulation of biological process;GO:0006950//response to stress;GO:0001654//eye development;GO:0044700//single organism signaling;GO:0009653//anatomical structure morphogenesis;GO:0006355//regulation of transcription, DNA-templated;GO:0048513//an…
TCONS_00003699	141.883	16.6933	3.84667	0.27	-3.83258	0.00229786	0.0427404	yes	CEP85	XP_005676875.2 PREDICTED: LOW QUALITY PROTEIN: centrosomal protein of 85 kDa [Capra hircus]	-	-	-	-	GO:0043232//intracellular non-membrane-bounded organelle;GO:0005815//microtubule organizing center;GO:0044446//intracellular organelle part;GO:0043229//intracellular organelle;GO:0044422//organelle part;GO:0043228//non-membrane-bounded organelle;GO:0044424//intracellular part;GO:0005623//cell;GO:0005856//cytoskeleton;GO:0043226//organelle;GO:0044464//cell part;GO:0044430//cytoskeletal part;GO:001…	-	-
TCONS_00003839	225.43	1893.74	9.53333	44.2733	2.21539	0.00196354	0.0378998	yes	SERINC2	XP_017912884.1 PREDICTED: serine incorporator 2 isoform X1 [Capra hircus]	-	-	-	-	GO:0031224//intrinsic component of membrane;GO:0031988//membrane-bounded vesicle;GO:0016020//membrane;GO:0044425//membrane part;GO:0043226//organelle;GO:0031982//vesicle;GO:0043227//membrane-bounded organelle	GO:0015171//amino acid transmembrane transporter activity;GO:0005215//transporter activity;GO:0005342//organic acid transmembrane transporter activity;GO:0046943//carboxylic acid transmembrane transporter activity;GO:0022891//substrate-specific transmembrane transporter activity;GO:0022857//transmembrane transporter activity;GO:0008514//organic anion transmembrane transporter activity;GO:0008509/…	GO:0006865//amino acid transport;GO:0071702//organic substance transport;GO:0006811//ion transport;GO:0044238//primary metabolic process;GO:0015849//organic acid transport;GO:0006810//transport;GO:0015807//L-amino acid transport;GO:0008152//metabolic process;GO:1902578//single-organism localization;GO:0044710//single-organism metabolic process;GO:0046942//carboxylic acid transport;GO:0071704//org…
TCONS_00003959	164.857	7.88667	1.34	0.04	-5.06609	0.000234681	0.00720886	yes	GPR55	XP_017913805.1 PREDICTED: G-protein coupled receptor 55 [Capra hircus]	-	-	-	-	GO:0016021//integral component of membrane;GO:0044425//membrane part;GO:0031224//intrinsic component of membrane;GO:0016020//membrane	GO:0060089//molecular transducer activity;GO:0099600//transmembrane receptor activity;GO:0004871//signal transducer activity;GO:0038023//signaling receptor activity;GO:0004872//receptor activity;GO:0004888//transmembrane signaling receptor activity;GO:0004930//G-protein coupled receptor activity	GO:0051247//positive regulation of protein metabolic process;GO:1902106//negative regulation of leukocyte differentiation;GO:2000026//regulation of multicellular organismal development;GO:0023051//regulation of signaling;GO:0045937//positive regulation of phosphate metabolic process;GO:1902105//regulation of leukocyte differentiation;GO:0060191//regulation of lipase activity;GO:0060249//anatomica…
TCONS_00004121	103.017	0.04	0.97	0.001	-9.92184	0.000492395	0.0128921	yes	USP37	XP_005676598.1 PREDICTED: ubiquitin carboxyl-terminal hydrolase 37 isoform X1 [Capra hircus]	-	-	-	-	-	-	-
TCONS_00004174	203.333	18.4367	2.13333	0.11	-4.27753	0.000100619	0.00368301	yes	BARD1	XP_013828006.2 PREDICTED: BRCA1-associated RING domain protein 1 isoform X1 [Capra hircus]	-	-	-	-	GO:0044464//cell part;GO:0005622//intracellular;GO:0044446//intracellular organelle part;GO:1990234//transferase complex;GO:0044428//nuclear part;GO:0043227//membrane-bounded organelle;GO:1902494//catalytic complex;GO:0032991//macromolecular complex;GO:0043234//protein complex;GO:0043232//intracellular non-membrane-bounded organelle;GO:0043231//intracellular membrane-bounded organelle;GO:0000152/…	GO:0043169//cation binding;GO:0046872//metal ion binding;GO:0005488//binding;GO:0043167//ion binding;GO:0046983//protein dimerization activity;GO:0046914//transition metal ion binding;GO:0005515//protein binding	GO:0008152//metabolic process;GO:0051049//regulation of transport;GO:0065007//biological regulation;GO:0044267//cellular protein metabolic process;GO:0060341//regulation of cellular localization;GO:0010941//regulation of cell death;GO:0016567//protein ubiquitination;GO:0006796//phosphate-containing compound metabolic process;GO:0050789//regulation of biological process;GO:0071704//organic substan…
TCONS_00004473	1869.62	569.943	15.5867	3.04333	-2.35659	0.000738788	0.0177923	yes	MGAT5	XP_017917563.1 PREDICTED: alpha-1,6-mannosylglycoprotein 6-beta-N-acetylglucosaminyltransferase A [Capra hircus]	Metabolism	Glycan biosynthesis and metabolism;Global and Overview	ko01100//Metabolic pathways;ko00510//N-Glycan biosynthesis	K00744	GO:0043227//membrane-bounded organelle;GO:0043226//organelle;GO:0031988//membrane-bounded vesicle;GO:0031982//vesicle	GO:0003824//catalytic activity;GO:0016740//transferase activity;GO:0016758//transferase activity, transferring hexosyl groups;GO:0008194//UDP-glycosyltransferase activity;GO:0016757//transferase activity, transferring glycosyl groups;GO:0008375//acetylglucosaminyltransferase activity	GO:0009059//macromolecule biosynthetic process;GO:0009101//glycoprotein biosynthetic process;GO:0044249//cellular biosynthetic process;GO:0009987//cellular process;GO:0070085//glycosylation;GO:0036211//protein modification process;GO:0043170//macromolecule metabolic process;GO:0043412//macromolecule modification;GO:0034645//cellular macromolecule biosynthetic process;GO:0043413//macromolecule gly…
TCONS_00004505	497.25	133.163	7.18333	1.23	-2.546	0.00152228	0.0311836	yes	R3HDM1	XP_017917813.1 PREDICTED: R3H domain-containing protein 1 isoform X9 [Capra hircus]	-	-	-	-	-	GO:1901363//heterocyclic compound binding;GO:0005488//binding;GO:0003723//RNA binding;GO:0003676//nucleic acid binding;GO:0097159//organic cyclic compound binding	-
TCONS_00004539	164.947	10.6333	11.8167	0.416667	-4.82579	0.000103151	0.00375716	yes	ARHGAP15	XP_004004769.1 PREDICTED: rho GTPase-activating protein 15 isoform X1 [Ovis aries]	-	-	-	-	GO:0005623//cell;GO:0044464//cell part;GO:0005622//intracellular;GO:0044424//intracellular part	-	GO:0051128//regulation of cellular component organization;GO:0043087//regulation of GTPase activity;GO:0050794//regulation of cellular process;GO:0050793//regulation of developmental process;GO:0051336//regulation of hydrolase activity;GO:0022603//regulation of anatomical structure morphogenesis;GO:0065007//biological regulation;GO:0022604//regulation of cell morphogenesis;GO:0050790//regulation …
TCONS_00004557	35.6533	0	0.393333	0.001	-8.61961	0.00171446	0.0342507	yes	MBD5	XP_005956062.1 PREDICTED: methyl-CpG-binding domain protein 5 isoform X2 [Pantholops hodgsonii]	-	-	-	-	GO:0043227//membrane-bounded organelle;GO:0044464//cell part;GO:0043229//intracellular organelle;GO:0031988//membrane-bounded vesicle;GO:0044422//organelle part;GO:0031982//vesicle;GO:0043228//non-membrane-bounded organelle;GO:0043226//organelle;GO:0044424//intracellular part;GO:0005622//intracellular;GO:0044446//intracellular organelle part;GO:0043231//intracellular membrane-bounded organelle;GO…	GO:0005488//binding	GO:0044699//single-organism process;GO:0032502//developmental process;GO:0048731//system development;GO:0007275//multicellular organism development;GO:0050794//regulation of cellular process;GO:0010647//positive regulation of cell communication;GO:0023051//regulation of signaling;GO:0050789//regulation of biological process;GO:0065007//biological regulation;GO:0040008//regulation of growth;GO:004…
TCONS_00004617	71.71	0	0.78	0.001	-9.60733	0.000117178	0.0041825	yes	GPD2	XP_004004734.1 PREDICTED: glycerol-3-phosphate dehydrogenase, mitochondrial isoform X1 [Ovis aries]	Metabolism	Global and Overview;Lipid metabolism	ko00564//Glycerophospholipid metabolism;ko01110//Biosynthesis of secondary metabolites	K00111	GO:0044446//intracellular organelle part;GO:0005623//cell;GO:0043227//membrane-bounded organelle;GO:0043226//organelle;GO:0031975//envelope;GO:0044422//organelle part;GO:0043231//intracellular membrane-bounded organelle;GO:0005737//cytoplasm;GO:0043229//intracellular organelle;GO:0005622//intracellular;GO:0044464//cell part;GO:0044424//intracellular part;GO:0019866//organelle inner membrane;GO:00…	GO:0046872//metal ion binding;GO:0016901//oxidoreductase activity, acting on the CH-OH group of donors, quinone or similar compound as acceptor;GO:0003824//catalytic activity;GO:0016491//oxidoreductase activity;GO:0043167//ion binding;GO:0043169//cation binding;GO:0052590//sn-glycerol-3-phosphate:ubiquinone oxidoreductase activity;GO:0004368//glycerol-3-phosphate dehydrogenase activity;GO:0005488…	GO:0006071//glycerol metabolic process;GO:0048513//animal organ development;GO:0044763//single-organism cellular process;GO:0006629//lipid metabolic process;GO:0044723//single-organism carbohydrate metabolic process;GO:0019400//alditol metabolic process;GO:0009987//cellular process;GO:0019751//polyol metabolic process;GO:0008152//metabolic process;GO:0044767//single-organism developmental process…
TCONS_00004683	597.337	198.68	3.24333	0.6	-2.43444	0.00146975	0.0303284	yes	-	XP_012770936.1 hypothetical protein, conserved [Babesia bigemina]	-	-	-	-	GO:0030054//cell junction;GO:0005623//cell;GO:0031252//cell leading edge;GO:0070161//anchoring junction;GO:0044464//cell part	GO:0005515//protein binding;GO:0050839//cell adhesion molecule binding;GO:0003779//actin binding;GO:0008092//cytoskeletal protein binding;GO:0005488//binding	GO:0010468//regulation of gene expression;GO:0098602//single organism cell adhesion;GO:0050789//regulation of biological process;GO:0022610//biological adhesion;GO:0065007//biological regulation;GO:0044699//single-organism process;GO:0060255//regulation of macromolecule metabolic process;GO:0007155//cell adhesion;GO:0019222//regulation of metabolic process
TCONS_00005370	48.49	0	1.4	0.001	-10.4512	0.000494463	0.0129158	yes	CNR2	XP_011970747.1 PREDICTED: cannabinoid receptor 2 isoform X1 [Ovis aries musimon]	Environmental Information Processing	Signaling molecules and interaction	ko04080//Neuroactive ligand-receptor interaction	K04278	GO:0016020//membrane;GO:0031224//intrinsic component of membrane;GO:0044425//membrane part	GO:0004930//G-protein coupled receptor activity;GO:0038023//signaling receptor activity;GO:0099600//transmembrane receptor activity;GO:0060089//molecular transducer activity;GO:0004888//transmembrane signaling receptor activity;GO:0004871//signal transducer activity;GO:0004872//receptor activity	GO:0050794//regulation of cellular process;GO:0050896//response to stimulus;GO:0050789//regulation of biological process;GO:0023052//signaling;GO:0044700//single organism signaling;GO:0007186//G-protein coupled receptor signaling pathway;GO:0051716//cellular response to stimulus;GO:0007154//cell communication;GO:0044763//single-organism cellular process;GO:0009987//cellular process;GO:0007165//si…
TCONS_00005465	122.787	7.95667	1.41	0.0566667	-4.63705	0.00119293	0.0258885	yes	-	-	-	-	-	-	-	-	-
TCONS_00005726	82.9933	0	2.03	0.001	-10.9873	3.57228e-05	0.00156344	yes	SP140L	XP_012003654.1 PREDICTED: nuclear autoantigen Sp-100 isoform X1 [Ovis aries]	-	-	-	-	-	-	-
TCONS_00005727	197.92	10.6567	5.00667	0.16	-4.96771	2.31843e-05	0.00107717	yes	SP140L	XP_005676721.2 PREDICTED: nuclear autoantigen Sp-100 isoform X1 [Capra hircus]	-	-	-	-	-	-	-
TCONS_00006222	868.117	78.5433	6.74333	0.333333	-4.33842	0.000335228	0.00956554	yes	Gls	XP_012009677.1 PREDICTED: glutaminase kidney isoform, mitochondrial isoform X5 [Ovis aries musimon]	Metabolism;Organismal Systems	Global and Overview;Nervous system;Excretory system;Amino acid metabolism;Metabolism of other amino acids	ko01100//Metabolic pathways;ko04724//Glutamatergic synapse;ko04727//GABAergic synapse;ko00250//Alanine, aspartate and glutamate metabolism;ko04964//Proximal tubule bicarbonate reclamation;ko00220//Arginine biosynthesis;ko00471//D-Glutamine and D-glutamate metabolism	K01425	-	GO:0016810//hydrolase activity, acting on carbon-nitrogen (but not peptide) bonds;GO:0003824//catalytic activity;GO:0016787//hydrolase activity;GO:0016811//hydrolase activity, acting on carbon-nitrogen (but not peptide) bonds, in linear amides	GO:0022607//cellular component assembly;GO:0019752//carboxylic acid metabolic process;GO:0016043//cellular component organization;GO:0009987//cellular process;GO:0071840//cellular component organization or biogenesis;GO:0043436//oxoacid metabolic process;GO:0009064//glutamine family amino acid metabolic process;GO:0051259//protein oligomerization;GO:0044238//primary metabolic process;GO:0070271//…
TCONS_00006459	29.3233	0	1.43667	0.001	-10.4885	0.00276334	0.049086	yes	NMI	XP_005676212.1 PREDICTED: N-myc-interactor [Capra hircus]	-	-	-	-	GO:0044424//intracellular part;GO:0005623//cell;GO:0044464//cell part;GO:0005622//intracellular	-	-
TCONS_00006766	716.77	18.6867	9.93333	0.176667	-5.81318	0.000208061	0.00654012	yes	Wipf1	XP_017920376.1 PREDICTED: WAS/WASL-interacting protein family member 1 [Capra hircus]	Cellular Processes	Transport and catabolism	ko04144//Endocytosis	K19475	GO:0005622//intracellular;GO:0043228//non-membrane-bounded organelle;GO:0043229//intracellular organelle;GO:0015629//actin cytoskeleton;GO:0005856//cytoskeleton;GO:0044424//intracellular part;GO:0043232//intracellular non-membrane-bounded organelle;GO:0043226//organelle;GO:0044464//cell part;GO:0005623//cell	-	GO:0006928//movement of cell or subcellular component;GO:0071840//cellular component organization or biogenesis;GO:0050896//response to stimulus;GO:0044763//single-organism cellular process;GO:0007015//actin filament organization;GO:0043933//macromolecular complex subunit organization;GO:1902589//single-organism organelle organization;GO:0071822//protein complex subunit organization;GO:0030029//a…
TCONS_00006850	686.55	10.91	0.496667	0.00333333	-7.21917	2.39848e-06	0.000156077	yes	TTN	XP_017920706.1 PREDICTED: titin isoform X1 [Capra hircus]	-	-	-	-	GO:0044444//cytoplasmic part;GO:0031674//I band;GO:0044449//contractile fiber part;GO:0043229//intracellular organelle;GO:0044464//cell part;GO:0043226//organelle;GO:0043292//contractile fiber;GO:0005623//cell;GO:0044424//intracellular part;GO:0005737//cytoplasm;GO:0005622//intracellular;GO:0044422//organelle part;GO:0030016//myofibril;GO:0030017//sarcomere;GO:0043232//intracellular non-membrane-…	GO:0016301//kinase activity;GO:0016772//transferase activity, transferring phosphorus-containing groups;GO:0032549//ribonucleoside binding;GO:0003824//catalytic activity;GO:0005488//binding;GO:0097159//organic cyclic compound binding;GO:0032550//purine ribonucleoside binding;GO:0001883//purine nucleoside binding;GO:1901363//heterocyclic compound binding;GO:0001882//nucleoside binding;GO:0016740//…	GO:0044767//single-organism developmental process;GO:0030154//cell differentiation;GO:0048869//cellular developmental process;GO:0030029//actin filament-based process;GO:0048468//cell development;GO:0048644//muscle organ morphogenesis;GO:0031032//actomyosin structure organization;GO:0036211//protein modification process;GO:0032989//cellular component morphogenesis;GO:0060415//muscle tissue morpho…
TCONS_00007173	129.913	0	1.19667	0.001	-10.2248	0.000211344	0.00661993	yes	COL6A3	XP_017896216.1 PREDICTED: collagen alpha-3(VI) chain isoform X4 [Capra hircus]	Environmental Information Processing;Cellular Processes;Organismal Systems	Signal transduction;Signaling molecules and interaction;Digestive system;Cellular commiunity	ko04151//PI3K-Akt signaling pathway;ko04510//Focal adhesion;ko04974//Protein digestion and absorption;ko04512//ECM-receptor interaction	K06238	GO:0043227//membrane-bounded organelle;GO:0005576//extracellular region;GO:0044421//extracellular region part;GO:0043226//organelle;GO:0044464//cell part;GO:0005886//plasma membrane;GO:0005623//cell;GO:0016020//membrane;GO:0031982//vesicle;GO:0071944//cell periphery;GO:0031988//membrane-bounded vesicle	-	GO:0048519//negative regulation of biological process;GO:0065009//regulation of molecular function;GO:0050790//regulation of catalytic activity;GO:0043086//negative regulation of catalytic activity;GO:0045861//negative regulation of proteolysis;GO:0051246//regulation of protein metabolic process;GO:0065007//biological regulation;GO:0032269//negative regulation of cellular protein metabolic proces…
TCONS_00007176	126.607	0	1.09333	0.001	-10.0945	0.000235758	0.00723193	yes	COL6A3	XP_017896208.1 PREDICTED: collagen alpha-3(VI) chain isoform X3 [Capra hircus]	Cellular Processes;Environmental Information Processing;Organismal Systems	Digestive system;Cellular commiunity;Signal transduction;Signaling molecules and interaction	ko04151//PI3K-Akt signaling pathway;ko04510//Focal adhesion;ko04974//Protein digestion and absorption;ko04512//ECM-receptor interaction	K06238	GO:0005623//cell;GO:0016020//membrane;GO:0031982//vesicle;GO:0005576//extracellular region;GO:0005886//plasma membrane;GO:0043226//organelle;GO:0044464//cell part;GO:0044421//extracellular region part;GO:0031988//membrane-bounded vesicle;GO:0043227//membrane-bounded organelle;GO:0071944//cell periphery	-	GO:0019222//regulation of metabolic process;GO:0030162//regulation of proteolysis;GO:0065007//biological regulation;GO:0031323//regulation of cellular metabolic process;GO:0050794//regulation of cellular process;GO:0052547//regulation of peptidase activity;GO:0010466//negative regulation of peptidase activity;GO:0050790//regulation of catalytic activity;GO:0043086//negative regulation of catalyti…
TCONS_00007195	1267.76	56.0767	12.45	0.37	-5.07248	1.85027e-08	2.24401e-06	yes	HJURP	XP_014947131.1 PREDICTED: LOW QUALITY PROTEIN: Holliday junction recognition protein isoform X1 [Ovis aries]	-	-	-	-	GO:0098687//chromosomal region;GO:0043234//protein complex;GO:0032991//macromolecular complex;GO:0043227//membrane-bounded organelle;GO:0005694//chromosome;GO:0044422//organelle part;GO:0044424//intracellular part;GO:0043232//intracellular non-membrane-bounded organelle;GO:0043228//non-membrane-bounded organelle;GO:0000775//chromosome, centromeric region;GO:0005623//cell;GO:0044427//chromosomal p…	GO:0005488//binding;GO:0005515//protein binding	GO:0044087//regulation of cellular component biogenesis;GO:0051276//chromosome organization;GO:0006996//organelle organization;GO:0016043//cellular component organization;GO:0044763//single-organism cellular process;GO:0071822//protein complex subunit organization;GO:0043486//histone exchange;GO:0043044//ATP-dependent chromatin remodeling;GO:0009987//cellular process;GO:0065007//biological regula…
TCONS_00007275	158.293	0	2.19667	0.001	-11.1011	0.000273052	0.00810778	yes	THRAP3	XP_005678755.1 PREDICTED: thyroid hormone receptor-associated protein 3 isoform X2 [Capra hircus]	-	-	-	-	GO:0005623//cell;GO:0043227//membrane-bounded organelle;GO:0044464//cell part;GO:0043229//intracellular organelle;GO:0043234//protein complex;GO:0043231//intracellular membrane-bounded organelle;GO:0005622//intracellular;GO:0032991//macromolecular complex;GO:0044424//intracellular part;GO:0043226//organelle	GO:0060089//molecular transducer activity;GO:0005488//binding;GO:0003712//transcription cofactor activity;GO:0003723//RNA binding;GO:0003676//nucleic acid binding;GO:0005515//protein binding;GO:0000988//transcription factor activity, protein binding;GO:0001076//transcription factor activity, RNA polymerase II transcription factor binding;GO:1901363//heterocyclic compound binding;GO:0097159//organ…	GO:0044763//single-organism cellular process;GO:0009755//hormone-mediated signaling pathway;GO:0050794//regulation of cellular process;GO:0009059//macromolecule biosynthetic process;GO:1901360//organic cyclic compound metabolic process;GO:0043487//regulation of RNA stability;GO:0032774//RNA biosynthetic process;GO:0048545//response to steroid hormone;GO:0034654//nucleobase-containing compound bio…
TCONS_00007309	0	946.153	0.001	2.23	11.1228	2.33477e-14	1.57455e-11	yes	Macf1	XP_017897615.1 PREDICTED: microtubule-actin cross-linking factor 1 isoform X5 [Capra hircus]	-	-	-	-	GO:0098589//membrane region;GO:0044424//intracellular part;GO:0043231//intracellular membrane-bounded organelle;GO:0042995//cell projection;GO:0044459//plasma membrane part;GO:0043226//organelle;GO:0031253//cell projection membrane;GO:0005856//cytoskeleton;GO:0043229//intracellular organelle;GO:0005622//intracellular;GO:0005623//cell;GO:0043227//membrane-bounded organelle;GO:0015630//microtubule …	GO:0003723//RNA binding;GO:0005488//binding;GO:0005515//protein binding;GO:0016462//pyrophosphatase activity;GO:0016818//hydrolase activity, acting on acid anhydrides, in phosphorus-containing anhydrides;GO:0017111//nucleoside-triphosphatase activity;GO:0016787//hydrolase activity;GO:0003824//catalytic activity;GO:0015631//tubulin binding;GO:1901363//heterocyclic compound binding;GO:0043167//ion …	GO:0051234//establishment of localization;GO:0007017//microtubule-based process;GO:0007166//cell surface receptor signaling pathway;GO:0007165//signal transduction;GO:1902578//single-organism localization;GO:0070727//cellular macromolecule localization;GO:0033036//macromolecule localization;GO:0045184//establishment of protein localization;GO:0051641//cellular localization;GO:0051716//cellular re…
TCONS_00007311	1845.09	395.773	5.58333	0.72	-2.95506	2.49971e-05	0.00115178	yes	MACF1	XP_017897606.1 PREDICTED: microtubule-actin cross-linking factor 1 isoform X3 [Capra hircus]	-	-	-	-	GO:0043226//organelle;GO:0043227//membrane-bounded organelle;GO:0071944//cell periphery;GO:0005886//plasma membrane;GO:0044425//membrane part;GO:0005623//cell;GO:0043229//intracellular organelle;GO:0098805//whole membrane;GO:0098589//membrane region;GO:0031253//cell projection membrane;GO:0043232//intracellular non-membrane-bounded organelle;GO:0042995//cell projection;GO:0043231//intracellular m…	GO:1901363//heterocyclic compound binding;GO:0016817//hydrolase activity, acting on acid anhydrides;GO:0003723//RNA binding;GO:0097159//organic cyclic compound binding;GO:0003676//nucleic acid binding;GO:0046872//metal ion binding;GO:0008092//cytoskeletal protein binding;GO:0043167//ion binding;GO:0017111//nucleoside-triphosphatase activity;GO:0016462//pyrophosphatase activity;GO:0005488//binding…	GO:0007166//cell surface receptor signaling pathway;GO:0033036//macromolecule localization;GO:0061024//membrane organization;GO:0006810//transport;GO:1902578//single-organism localization;GO:0007017//microtubule-based process;GO:0006612//protein targeting to membrane;GO:0007049//cell cycle;GO:0016043//cellular component organization;GO:0006605//protein targeting;GO:0022402//cell cycle process;GO:…
TCONS_00007780	163.77	0	1.68	0.001	-10.7142	1.07042e-06	7.88069e-05	yes	IL12RB2	XP_017900844.1 PREDICTED: interleukin-12 receptor subunit beta-2 isoform X1 [Capra hircus]	Environmental Information Processing	Signal transduction;Signaling molecules and interaction	ko04060//Cytokine-cytokine receptor interaction;ko04630//Jak-STAT signaling pathway	K05064	GO:0044459//plasma membrane part;GO:0016020//membrane;GO:0043235//receptor complex;GO:0044425//membrane part;GO:0043234//protein complex;GO:0071944//cell periphery;GO:0005623//cell;GO:0044464//cell part;GO:0031224//intrinsic component of membrane;GO:0005886//plasma membrane;GO:0032991//macromolecular complex	GO:0004896//cytokine receptor activity;GO:0004871//signal transducer activity;GO:0019955//cytokine binding;GO:0004872//receptor activity;GO:0019900//kinase binding;GO:0099600//transmembrane receptor activity;GO:0005488//binding;GO:0004888//transmembrane signaling receptor activity;GO:0005515//protein binding;GO:0060089//molecular transducer activity;GO:0038023//signaling receptor activity;GO:0019…	GO:0051239//regulation of multicellular organismal process;GO:0071704//organic substance metabolic process;GO:0051704//multi-organism process;GO:0019538//protein metabolic process;GO:0044700//single organism signaling;GO:0007154//cell communication;GO:0009607//response to biotic stimulus;GO:0044763//single-organism cellular process;GO:0009617//response to bacterium;GO:0009605//response to externa…
TCONS_00007850	594.157	63.24	12.9167	0.72	-4.16509	7.12201e-05	0.00280283	yes	IFI44L	XP_005678306.3 PREDICTED: interferon-induced protein 44-like [Capra hircus]	-	-	-	-	-	-	-
TCONS_00008067	421.867	41.4833	21.3267	1.26	-4.08116	1.95625e-05	0.000935259	yes	SNX7	XP_017901295.1 PREDICTED: sorting nexin-7 isoform X1 [Capra hircus]	-	-	-	-	-	-	-
TCONS_00008283	3.84667	181.293	0.07	1.73667	4.63282	0.00239864	0.044172	yes	-	XP_014953443.1 PREDICTED: glypican-5 isoform X5 [Ovis aries]	-	-	-	-	GO:0044424//intracellular part;GO:0044464//cell part;GO:0043229//intracellular organelle;GO:0043231//intracellular membrane-bounded organelle;GO:0043226//organelle;GO:0016020//membrane;GO:0043227//membrane-bounded organelle;GO:0005622//intracellular;GO:0044425//membrane part;GO:0005623//cell	GO:0005488//binding	GO:0006464//cellular protein modification process;GO:0006091//generation of precursor metabolites and energy;GO:0044238//primary metabolic process;GO:0044763//single-organism cellular process;GO:0043170//macromolecule metabolic process;GO:0043412//macromolecule modification;GO:0071704//organic substance metabolic process;GO:0015980//energy derivation by oxidation of organic compounds;GO:0050794//…
TCONS_00008300	967.51	126.433	4.91	0.353333	-3.79662	7.55461e-06	0.000414241	yes	SPEN	XP_005891342.1 PREDICTED: putative RNA-binding protein 15 isoform X1 [Bos mutus]	-	-	-	-	GO:0031981//nuclear lumen;GO:0044446//intracellular organelle part;GO:0044428//nuclear part;GO:0043231//intracellular membrane-bounded organelle;GO:0043227//membrane-bounded organelle;GO:0031974//membrane-enclosed lumen;GO:0043226//organelle;GO:0044424//intracellular part;GO:0005634//nucleus;GO:0031090//organelle membrane;GO:0005623//cell;GO:0070013//intracellular organelle lumen;GO:0043233//orga…	GO:0036094//small molecule binding;GO:0003676//nucleic acid binding;GO:0003723//RNA binding;GO:0097159//organic cyclic compound binding;GO:1901363//heterocyclic compound binding;GO:0005488//binding	GO:0051173//positive regulation of nitrogen compound metabolic process;GO:0048519//negative regulation of biological process;GO:0080090//regulation of primary metabolic process;GO:0009893//positive regulation of metabolic process;GO:0006355//regulation of transcription, DNA-templated;GO:0048856//anatomical structure development;GO:0010556//regulation of macromolecule biosynthetic process;GO:00650…
TCONS_00008757	697.537	193.517	9.07667	1.53667	-2.56236	0.000903952	0.0209012	yes	ATP8B2	XP_008525133.1 PREDICTED: probable phospholipid-transporting ATPase ID isoform X3 [Equus przewalskii]	-	-	-	-	-	-	-
TCONS_00008894	244.12	29.0533	4.88333	0.3	-4.02483	0.00139245	0.0290432	yes	L1RE1	XP_014946568.1 PREDICTED: SLAM family member 7-like isoform X5 [Ovis aries musimon]	-	-	-	-	-	-	-
TCONS_00008896	1907.39	643.96	7.91	1.44333	-2.45427	0.00265745	0.0477912	yes	Slamf8	XP_013831805.2 PREDICTED: CXADR-like membrane protein isoform X1 [Capra hircus]	-	-	-	-	-	-	-
TCONS_00008930	598.263	18.34	23.1267	0.423333	-5.77162	1.92856e-06	0.000129278	yes	CD1D	ELR50693.1 Spectrin beta chain, brain 2 [Bos mutus]	-	-	-	-	GO:0031224//intrinsic component of membrane;GO:0044464//cell part;GO:0043227//membrane-bounded organelle;GO:0005774//vacuolar membrane;GO:0000323//lytic vacuole;GO:0044425//membrane part;GO:0005623//cell;GO:0044424//intracellular part;GO:0098805//whole membrane;GO:0031090//organelle membrane;GO:0005622//intracellular;GO:0043231//intracellular membrane-bounded organelle;GO:0005773//vacuole;GO:0044…	GO:0030882//lipid antigen binding;GO:0005488//binding;GO:0005515//protein binding;GO:0008289//lipid binding;GO:0003823//antigen binding	GO:0030155//regulation of cell adhesion;GO:0050863//regulation of T cell activation;GO:0002694//regulation of leukocyte activation;GO:0002376//immune system process;GO:0006952//defense response;GO:0002682//regulation of immune system process;GO:0044237//cellular metabolic process;GO:0022407//regulation of cell-cell adhesion;GO:0019882//antigen processing and presentation;GO:0034110//regulation of…
TCONS_00008949	330.51	0	8.32667	0.001	-13.0235	3.72594e-11	1.08393e-08	yes	-	XP_005677343.1 PREDICTED: T-cell surface glycoprotein CD1b-1 [Capra hircus]	Organismal Systems	Immune system	ko04640//Hematopoietic cell lineage	K06448	-	-	-
TCONS_00008954	651.343	0	4.55	0.001	-12.1517	8.68245e-16	8.58791e-13	yes	-	XP_017902083.1 PREDICTED: T-cell surface glycoprotein CD1b-3 [Capra hircus]	Organismal Systems	Immune system	ko04640//Hematopoietic cell lineage	K06448	-	-	-
TCONS_00008955	462.533	0.356667	3.3	0.001	-11.6883	1.07221e-12	4.92e-10	yes	-	XP_017902083.1 PREDICTED: T-cell surface glycoprotein CD1b-3 [Capra hircus]	Organismal Systems	Immune system	ko04640//Hematopoietic cell lineage	K06448	-	-	-
TCONS_00009185	464.07	28.4733	7.60333	0.283333	-4.74606	2.34481e-07	2.03049e-05	yes	RCSD1	XP_017901935.1 PREDICTED: capZ-interacting protein isoform X3 [Capra hircus]	-	-	-	-	-	-	GO:0006950//response to stress;GO:0009628//response to abiotic stimulus;GO:0006972//hyperosmotic response;GO:0006970//response to osmotic stress;GO:0050896//response to stimulus
TCONS_00009329	102.847	0	2.84	0.001	-11.4717	6.53773e-05	0.00260514	yes	Traf3ip1	XP_017895661.1 PREDICTED: TRAF3-interacting protein 1 isoform X1 [Capra hircus]	-	-	-	-	-	-	-
TCONS_00009565	1810.35	582.743	7.77333	1.41	-2.46284	0.000918066	0.0211656	yes	CFDP2	ELR45514.1 Transposon TX1 uncharacterized 149 kDa protein, partial [Bos mutus]	-	-	-	-	-	-	-
TCONS_00009573	902.35	295.297	20.6033	4.28333	-2.26607	0.00169056	0.0339254	yes	INPP5B	XP_017897412.1 PREDICTED: type II inositol 1,4,5-trisphosphate 5-phosphatase isoform X3 [Capra hircus]	Environmental Information Processing;Metabolism	Signal transduction;Carbohydrate metabolism;Global and Overview	ko01100//Metabolic pathways;ko04070//Phosphatidylinositol signaling system;ko00562//Inositol phosphate metabolism	K01099	GO:0044425//membrane part;GO:0005737//cytoplasm;GO:0005622//intracellular;GO:0005623//cell;GO:0016020//membrane;GO:0044424//intracellular part;GO:0043232//intracellular non-membrane-bounded organelle;GO:0043226//organelle;GO:0043229//intracellular organelle;GO:0005856//cytoskeleton;GO:0043228//non-membrane-bounded organelle;GO:0031224//intrinsic component of membrane;GO:0044444//cytoplasmic part;…	GO:0016787//hydrolase activity;GO:0046030//inositol trisphosphate phosphatase activity;GO:0042578//phosphoric ester hydrolase activity;GO:0016791//phosphatase activity;GO:0052745//inositol phosphate phosphatase activity;GO:0003824//catalytic activity;GO:0016788//hydrolase activity, acting on ester bonds;GO:0052866//phosphatidylinositol phosphate phosphatase activity;GO:0034593//phosphatidylinosit…	GO:0006629//lipid metabolic process;GO:0050789//regulation of biological process;GO:0019538//protein metabolic process;GO:0046486//glycerolipid metabolic process;GO:0006650//glycerophospholipid metabolic process;GO:0051674//localization of cell;GO:0008152//metabolic process;GO:0044763//single-organism cellular process;GO:0007276//gamete generation;GO:0044237//cellular metabolic process;GO:0048232…
TCONS_00010052	4256.15	1433.09	61.45	12.54	-2.29288	0.000447152	0.011968	yes	JAK1	XP_017900620.1 PREDICTED: tyrosine-protein kinase JAK1 [Capra hircus]	Organismal Systems;Environmental Information Processing;Cellular Processes	Cellular commiunity;Development;Signal transduction	ko04151//PI3K-Akt signaling pathway;ko04630//Jak-STAT signaling pathway;ko04550//Signaling pathways regulating pluripotency of stem cells;ko04380//Osteoclast differentiation	K11217	-	-	-
TCONS_00010104	137.47	3.84	5.09333	0.08	-5.99247	3.41062e-05	0.00150155	yes	DEPDC1	XP_017900897.1 PREDICTED: DEP domain-containing protein 1A isoform X1 [Capra hircus]	-	-	-	-	GO:0043226//organelle;GO:0043227//membrane-bounded organelle;GO:0043234//protein complex;GO:0044464//cell part;GO:0044424//intracellular part;GO:0043231//intracellular membrane-bounded organelle;GO:0005623//cell;GO:0043229//intracellular organelle;GO:0005622//intracellular;GO:0032991//macromolecular complex	-	GO:0007154//cell communication;GO:0050794//regulation of cellular process;GO:0031323//regulation of cellular metabolic process;GO:0044700//single organism signaling;GO:0050789//regulation of biological process;GO:2001141//regulation of RNA biosynthetic process;GO:0051171//regulation of nitrogen compound metabolic process;GO:0006355//regulation of transcription, DNA-templated;GO:0009987//cellular …
TCONS_00010808	296.233	8.69333	3.18	0.0566667	-5.81038	5.77564e-05	0.00234985	yes	SV2A	XP_019288503.1 PREDICTED: synaptic vesicle glycoprotein 2A isoform X3 [Panthera pardus]	Environmental Information Processing	Signaling molecules and interaction	ko04512//ECM-receptor interaction	K06258	GO:0043229//intracellular organelle;GO:0044444//cytoplasmic part;GO:0031410//cytoplasmic vesicle;GO:0030054//cell junction;GO:0043231//intracellular membrane-bounded organelle;GO:0005622//intracellular;GO:0031988//membrane-bounded vesicle;GO:0044422//organelle part;GO:0042995//cell projection;GO:0005623//cell;GO:0045202//synapse;GO:0043227//membrane-bounded organelle;GO:0016023//cytoplasmic, memb…	GO:0019900//kinase binding;GO:0005488//binding;GO:0005515//protein binding;GO:0019899//enzyme binding;GO:0005215//transporter activity	GO:1902578//single-organism localization;GO:0051234//establishment of localization;GO:0006810//transport;GO:0055082//cellular chemical homeostasis;GO:0098771//inorganic ion homeostasis;GO:0055065//metal ion homeostasis;GO:0065008//regulation of biological quality;GO:0009987//cellular process;GO:0019725//cellular homeostasis;GO:0044699//single-organism process;GO:0030003//cellular cation homeostas…
TCONS_00010857	2182.4	723.133	51.64	10.95	-2.23756	0.00110211	0.0243811	yes	Cdc42se1	EPQ15003.1 CDC42 small effector protein 1 [Myotis brandtii]	-	-	-	-	-	-	-
TCONS_00010908	181.193	0	3.62667	0.001	-11.8244	4.47731e-06	0.000262562	yes	RORC	XP_017901584.1 PREDICTED: nuclear receptor ROR-gamma isoform X4 [Capra hircus]	Organismal Systems	Environmental adaptation	ko04710//Circadian rhythm	K08534	-	-	-
TCONS_00011003	291.617	15.47	12.1633	0.36	-5.0784	0.00184686	0.0362449	yes	ILF2	NP_080650.1 interleukin enhancer-binding factor 2 [Mus musculus]	-	-	-	-	GO:0005622//intracellular;GO:0043232//intracellular non-membrane-bounded organelle;GO:0044422//organelle part;GO:0031974//membrane-enclosed lumen;GO:0044428//nuclear part;GO:0043228//non-membrane-bounded organelle;GO:0043231//intracellular membrane-bounded organelle;GO:0044446//intracellular organelle part;GO:0043227//membrane-bounded organelle;GO:0043233//organelle lumen;GO:0005623//cell;GO:0070…	GO:1901363//heterocyclic compound binding;GO:0003723//RNA binding;GO:0001882//nucleoside binding;GO:0097367//carbohydrate derivative binding;GO:0003676//nucleic acid binding;GO:0005488//binding;GO:0003824//catalytic activity;GO:0001883//purine nucleoside binding;GO:0032549//ribonucleoside binding;GO:0036094//small molecule binding;GO:0032550//purine ribonucleoside binding;GO:0097159//organic cycl…	GO:0031323//regulation of cellular metabolic process;GO:0050794//regulation of cellular process;GO:0009889//regulation of biosynthetic process;GO:0006355//regulation of transcription, DNA-templated;GO:0051171//regulation of nitrogen compound metabolic process;GO:0019219//regulation of nucleobase-containing compound metabolic process;GO:1903506//regulation of nucleic acid-templated transcription;G…
TCONS_00011128	182.713	0	1.82	0.001	-10.8297	3.17796e-08	3.64564e-06	yes	GON4L	XP_017901754.1 PREDICTED: GON-4-like protein isoform X2 [Capra hircus]	-	-	-	-	GO:0043231//intracellular membrane-bounded organelle;GO:0043227//membrane-bounded organelle;GO:0044424//intracellular part;GO:0005623//cell;GO:0005622//intracellular;GO:0043229//intracellular organelle;GO:0044464//cell part;GO:0043226//organelle	GO:0005488//binding	GO:0050789//regulation of biological process;GO:0060255//regulation of macromolecule metabolic process;GO:0010468//regulation of gene expression;GO:0065007//biological regulation;GO:0019222//regulation of metabolic process
TCONS_00011210	64.9867	1.43	1.02	0.0133333	-6.25739	0.00271368	0.0484889	yes	FCRL5	XP_017902016.1 PREDICTED: LOW QUALITY PROTEIN: Fc receptor-like protein 5 [Capra hircus]	-	-	-	-	GO:0043234//protein complex;GO:0032991//macromolecular complex	-	GO:1903650//negative regulation of cytoplasmic transport;GO:0048519//negative regulation of biological process;GO:0048523//negative regulation of cellular process;GO:0010646//regulation of cell communication;GO:0032387//negative regulation of intracellular transport;GO:0065007//biological regulation;GO:0010523//negative regulation of calcium ion transport into cytosol;GO:0032879//regulation of lo…
TCONS_00011211	32.18	0	0.48	0.001	-8.90689	0.00279691	0.0494734	yes	FCRL5	XP_017902016.1 PREDICTED: LOW QUALITY PROTEIN: Fc receptor-like protein 5 [Capra hircus]	-	-	-	-	GO:0032991//macromolecular complex;GO:0043234//protein complex	-	GO:0009966//regulation of signal transduction;GO:0050776//regulation of immune response;GO:0023051//regulation of signaling;GO:0051926//negative regulation of calcium ion transport;GO:0050854//regulation of antigen receptor-mediated signaling pathway;GO:0051924//regulation of calcium ion transport;GO:0032387//negative regulation of intracellular transport;GO:0043271//negative regulation of ion tr…
TCONS_00011219	2315.07	2.47333	9.61667	0.00666667	-10.4944	3.83937e-19	1.13927e-15	yes	gag-pro-pol	XP_014963784.1 PREDICTED: LOW QUALITY PROTEIN: endogenous retrovirus group K member 9 Pol protein-like [Ovis aries musimon]	-	-	-	-	-	GO:0003824//catalytic activity	-
TCONS_00011250	852.05	96.11	62.5467	3.74667	-4.06125	1.13284e-05	0.00058974	yes	MNDA	ALC80151.1 putative interferon-activable protein 203 [Capra hircus]	-	-	-	-	-	-	-
TCONS_00011320	1213.13	97.2467	16.8633	0.756667	-4.47809	0.000308065	0.00892126	yes	CD84	XP_017901869.1 PREDICTED: SLAM family member 5 isoform X2 [Capra hircus]	-	-	-	-	GO:0016020//membrane;GO:0043227//membrane-bounded organelle;GO:0031982//vesicle;GO:0031988//membrane-bounded vesicle;GO:0043226//organelle;GO:0044425//membrane part;GO:0031224//intrinsic component of membrane	-	-
TCONS_00011328	1504.99	122.213	91.9933	4.26	-4.4326	1.00059e-08	1.33342e-06	yes	CD48	XP_017901873.1 PREDICTED: CD48 antigen [Capra hircus]	Organismal Systems	Immune system	ko04650//Natural killer cell mediated cytotoxicity	K06479	GO:0031224//intrinsic component of membrane;GO:0005623//cell;GO:0044425//membrane part;GO:0005886//plasma membrane;GO:0044464//cell part;GO:0044459//plasma membrane part;GO:0016020//membrane;GO:0071944//cell periphery	-	GO:0050789//regulation of biological process;GO:0050794//regulation of cellular process;GO:0044699//single-organism process;GO:0001775//cell activation;GO:0002376//immune system process;GO:0045321//leukocyte activation;GO:0046649//lymphocyte activation;GO:0065007//biological regulation;GO:0044763//single-organism cellular process;GO:0009987//cellular process
TCONS_00011330	344.543	28.0833	20.6267	0.95	-4.44044	8.47004e-06	0.000456972	yes	CD48	XP_017901873.1 PREDICTED: CD48 antigen [Capra hircus]	Organismal Systems	Immune system	ko04650//Natural killer cell mediated cytotoxicity	K06479	GO:0044425//membrane part;GO:0016020//membrane	-	GO:0009987//cellular process;GO:0044699//single-organism process;GO:0044763//single-organism cellular process
TCONS_00011342	249.173	13.1967	20.9333	0.64	-5.03159	0.000235919	0.00723193	yes	CD48	XP_017902031.1 PREDICTED: CD48 antigen-like [Capra hircus]	Organismal Systems	Immune system	ko04650//Natural killer cell mediated cytotoxicity	K06479	GO:0016020//membrane;GO:0044425//membrane part	-	GO:0044763//single-organism cellular process;GO:0044699//single-organism process;GO:0009987//cellular process
TCONS_00011912	923.877	105.85	50.8	3.78667	-3.74583	3.35023e-06	0.000203714	yes	AKR1B1	ELR51182.1 Aldose reductase, partial [Bos mutus]	Metabolism	Carbohydrate metabolism;Global and Overview;Lipid metabolism	ko01100//Metabolic pathways;ko00561//Glycerolipid metabolism;ko00051//Fructose and mannose metabolism;ko00040//Pentose and glucuronate interconversions;ko00052//Galactose metabolism	K00011	GO:0044464//cell part;GO:0044424//intracellular part;GO:0005623//cell;GO:0005622//intracellular	GO:0016229//steroid dehydrogenase activity;GO:0008106//alcohol dehydrogenase (NADP+) activity;GO:0016491//oxidoreductase activity;GO:0033764//steroid dehydrogenase activity, acting on the CH-OH group of donors, NAD or NADP as acceptor;GO:0003824//catalytic activity;GO:0016616//oxidoreductase activity, acting on the CH-OH group of donors, NAD or NADP as acceptor;GO:0016614//oxidoreductase activity…	GO:0044699//single-organism process;GO:0008152//metabolic process;GO:0044710//single-organism metabolic process
TCONS_00012003	67.2333	0	0.59	0.001	-9.20457	7.97885e-05	0.00306521	yes	ZNF800	XP_010830028.1 PREDICTED: zinc finger protein 800 isoform X2 [Bison bison bison]	-	-	-	-	GO:0044424//intracellular part;GO:0043227//membrane-bounded organelle;GO:0043231//intracellular membrane-bounded organelle;GO:0005622//intracellular;GO:0043226//organelle;GO:0005623//cell;GO:0043229//intracellular organelle;GO:0044464//cell part	GO:0005488//binding;GO:0043167//ion binding;GO:0003676//nucleic acid binding;GO:0043169//cation binding;GO:1901363//heterocyclic compound binding;GO:0097159//organic cyclic compound binding	GO:0034645//cellular macromolecule biosynthetic process;GO:0009987//cellular process;GO:0044249//cellular biosynthetic process;GO:0071704//organic substance metabolic process;GO:0065007//biological regulation;GO:0050789//regulation of biological process;GO:0010468//regulation of gene expression;GO:0009059//macromolecule biosynthetic process;GO:0044237//cellular metabolic process;GO:0043170//macro…
TCONS_00012155	580.35	207.22	54.61	11.4367	-2.2555	0.00165745	0.0333966	yes	SRI	XP_005628534.1 PREDICTED: sorcin isoform X1 [Canis lupus familiaris]	-	-	-	-	-	-	-
TCONS_00012362	67.5867	0.39	8.33333	0.0266667	-8.28771	0.000424107	0.0115283	yes	TRGV3	XP_017902686.1 PREDICTED: T-cell receptor gamma-2 chain C region [Capra hircus]	-	-	-	-	-	-	-
TCONS_00012367	166.693	1.52667	5.91667	0.03	-7.62368	1.63554e-06	0.000114282	yes	-	CAA78351.1 TCR gamma, partial [Ovis aries]	-	-	-	-	-	-	-
TCONS_00012370	333.717	5.95	15.9633	0.19	-6.39262	1.71467e-06	0.000118122	yes	-	CAA78311.1 TCR gamma, partial [Ovis aries]	-	-	-	-	-	-	-
TCONS_00012501	203.563	5.49333	5.55	0.0733333	-6.24187	0.0021837	0.0411501	yes	PTPN12	XP_017902757.1 PREDICTED: tyrosine-protein phosphatase non-receptor type 12 isoform X1 [Capra hircus]	-	-	-	-	GO:0005622//intracellular;GO:0016020//membrane;GO:0044444//cytoplasmic part;GO:0044424//intracellular part;GO:0005623//cell;GO:0005737//cytoplasm;GO:0044464//cell part	GO:0019904//protein domain specific binding;GO:0016787//hydrolase activity;GO:0003824//catalytic activity;GO:0016791//phosphatase activity;GO:0004721//phosphoprotein phosphatase activity;GO:0005515//protein binding;GO:0016788//hydrolase activity, acting on ester bonds;GO:0042578//phosphoric ester hydrolase activity;GO:0005488//binding	GO:0016311//dephosphorylation;GO:0006796//phosphate-containing compound metabolic process;GO:0044237//cellular metabolic process;GO:0043412//macromolecule modification;GO:0006470//protein dephosphorylation;GO:0008152//metabolic process;GO:0044260//cellular macromolecule metabolic process;GO:0019538//protein metabolic process;GO:0036211//protein modification process;GO:0009987//cellular process;GO…
TCONS_00012524	232.707	38.7167	0.983333	0.09	-3.44968	0.00218994	0.0412327	yes	-	ABR01162.1 endonuclease/reverse transcriptase [Sus scrofa]	Genetic Information Processing	Replication and repair	ko03420//Nucleotide excision repair	K10838	-	-	-
TCONS_00013112	2840.72	309.847	81.7967	6.09667	-3.74595	0.000150534	0.00507871	yes	Zyx	XP_012016989.1 PREDICTED: zyxin isoform X2 [Ovis aries musimon]	Cellular Processes	Cellular commiunity	ko04510//Focal adhesion	K06273	GO:0043226//organelle;GO:0030055//cell-substrate junction;GO:0005622//intracellular;GO:0070161//anchoring junction;GO:0030054//cell junction;GO:0005623//cell;GO:0044464//cell part;GO:0043228//non-membrane-bounded organelle;GO:0005911//cell-cell junction;GO:0043231//intracellular membrane-bounded organelle;GO:0005924//cell-substrate adherens junction;GO:0043227//membrane-bounded organelle;GO:00059…	GO:1901363//heterocyclic compound binding;GO:0003723//RNA binding;GO:0046914//transition metal ion binding;GO:0097159//organic cyclic compound binding;GO:0043169//cation binding;GO:0046872//metal ion binding;GO:0005488//binding;GO:0043167//ion binding;GO:0003676//nucleic acid binding	GO:0022607//cellular component assembly;GO:0016043//cellular component organization;GO:0007178//transmembrane receptor protein serine/threonine kinase signaling pathway;GO:0007166//cell surface receptor signaling pathway;GO:0044700//single organism signaling;GO:0051716//cellular response to stimulus;GO:0065007//biological regulation;GO:0007010//cytoskeleton organization;GO:0050789//regulation of …
TCONS_00013136	356.68	13.9067	4.98333	0.123333	-5.33648	1.67228e-06	0.000116302	yes	Ephb6	XP_017902335.1 PREDICTED: ephrin type-B receptor 6 [Capra hircus]	Organismal Systems	Development	ko04360//Axon guidance	K05114	GO:0031224//intrinsic component of membrane;GO:0016021//integral component of membrane;GO:0044425//membrane part;GO:0016020//membrane	GO:0060089//molecular transducer activity;GO:0004872//receptor activity;GO:0005488//binding;GO:0001883//purine nucleoside binding;GO:0032549//ribonucleoside binding;GO:0004713//protein tyrosine kinase activity;GO:1901363//heterocyclic compound binding;GO:0016301//kinase activity;GO:0001882//nucleoside binding;GO:0099600//transmembrane receptor activity;GO:0097159//organic cyclic compound binding;…	GO:0006796//phosphate-containing compound metabolic process;GO:0044765//single-organism transport;GO:0044237//cellular metabolic process;GO:0007267//cell-cell signaling;GO:0050789//regulation of biological process;GO:0065007//biological regulation;GO:0007154//cell communication;GO:0044699//single-organism process;GO:0046903//secretion;GO:0098771//inorganic ion homeostasis;GO:0006464//cellular pro…
TCONS_00013142	2348.79	8.06	250.937	0.59	-8.73239	1.65182e-12	7.00215e-10	yes	TRBC2	AAI22730.1 T cell receptor, beta cluster [Bos taurus]	Environmental Information Processing;Organismal Systems	Signal transduction;Signaling molecules and interaction;Immune system	ko04014//Ras signaling pathway;ko04015//Rap1 signaling pathway;ko04020//Calcium signaling pathway;ko04514//Cell adhesion molecules (CAMs);ko04660//T cell receptor signaling pathway;ko04064//NF-kappa B signaling pathway;ko04612//Antigen processing and presentation;ko04672//Intestinal immune network for IgA production	K10785	-	-	-
TCONS_00013144	576.68	2.78667	83.8267	0.293333	-8.15872	1.76386e-07	1.59897e-05	yes	V-TCR	CAX32881.1 T-cell receptor beta chain, partial [Ovis aries]	Organismal Systems;Environmental Information Processing	Signaling molecules and interaction;Signal transduction;Immune system	ko04014//Ras signaling pathway;ko04015//Rap1 signaling pathway;ko04020//Calcium signaling pathway;ko04514//Cell adhesion molecules (CAMs);ko04660//T cell receptor signaling pathway;ko04064//NF-kappa B signaling pathway;ko04612//Antigen processing and presentation;ko04672//Intestinal immune network for IgA production	K10785	-	-	-
TCONS_00013145	1650.4	24.2267	222.33	2.42667	-6.51758	1.41842e-07	1.30757e-05	yes	V-TCR	CAX32936.1 T-cell receptor beta chain, partial [Ovis aries]	Environmental Information Processing;Organismal Systems	Signaling molecules and interaction;Signal transduction;Immune system	ko04014//Ras signaling pathway;ko04015//Rap1 signaling pathway;ko04020//Calcium signaling pathway;ko04514//Cell adhesion molecules (CAMs);ko04660//T cell receptor signaling pathway;ko04064//NF-kappa B signaling pathway;ko04612//Antigen processing and presentation;ko04672//Intestinal immune network for IgA production	K10785	-	-	-
TCONS_00013146	5066.97	17.93	576.747	1.35	-8.73883	7.6874e-12	2.78184e-09	yes	V-TCR	CAX32934.1 T-cell receptor beta chain, partial [Ovis aries]	Environmental Information Processing;Organismal Systems	Signal transduction;Signaling molecules and interaction;Immune system	ko04014//Ras signaling pathway;ko04015//Rap1 signaling pathway;ko04020//Calcium signaling pathway;ko04514//Cell adhesion molecules (CAMs);ko04660//T cell receptor signaling pathway;ko04064//NF-kappa B signaling pathway;ko04612//Antigen processing and presentation;ko04672//Intestinal immune network for IgA production	K10785	-	-	-
TCONS_00013149	2808.96	7.71333	422.107	0.803333	-9.03739	4.7696e-11	1.33662e-08	yes	V-TCR	CAX32903.1 T-cell receptor beta chain, partial [Ovis aries]	Environmental Information Processing;Organismal Systems	Signaling molecules and interaction;Signal transduction;Immune system	ko04014//Ras signaling pathway;ko04015//Rap1 signaling pathway;ko04020//Calcium signaling pathway;ko04514//Cell adhesion molecules (CAMs);ko04660//T cell receptor signaling pathway;ko04064//NF-kappa B signaling pathway;ko04612//Antigen processing and presentation;ko04672//Intestinal immune network for IgA production	K10785	-	-	-
TCONS_00013150	2729.79	3.86333	394.69	0.4	-9.9465	2.68464e-12	1.07652e-09	yes	V-TCR	CAX32951.1 T-cell receptor beta chain, partial [Ovis aries]	Environmental Information Processing;Organismal Systems	Signaling molecules and interaction;Signal transduction;Immune system	ko04014//Ras signaling pathway;ko04015//Rap1 signaling pathway;ko04020//Calcium signaling pathway;ko04514//Cell adhesion molecules (CAMs);ko04660//T cell receptor signaling pathway;ko04064//NF-kappa B signaling pathway;ko04612//Antigen processing and presentation;ko04672//Intestinal immune network for IgA production	K10785	-	-	-
TCONS_00013151	883.117	5.54667	122.35	0.58	-7.72075	1.33989e-06	9.54218e-05	yes	V-TCR	CAX32914.1 T-cell receptor beta chain, partial [Ovis aries]	Environmental Information Processing;Organismal Systems	Immune system;Signaling molecules and interaction;Signal transduction	ko04014//Ras signaling pathway;ko04015//Rap1 signaling pathway;ko04020//Calcium signaling pathway;ko04514//Cell adhesion molecules (CAMs);ko04660//T cell receptor signaling pathway;ko04064//NF-kappa B signaling pathway;ko04612//Antigen processing and presentation;ko04672//Intestinal immune network for IgA production	K10785	-	-	-
TCONS_00013152	1046.25	8.04667	151.53	0.85	-7.47792	5.54219e-07	4.38937e-05	yes	V-TCR	CAX32952.1 T-cell receptor beta chain, partial [Ovis aries]	Environmental Information Processing;Organismal Systems	Signaling molecules and interaction;Signal transduction;Immune system	ko04014//Ras signaling pathway;ko04015//Rap1 signaling pathway;ko04020//Calcium signaling pathway;ko04514//Cell adhesion molecules (CAMs);ko04660//T cell receptor signaling pathway;ko04064//NF-kappa B signaling pathway;ko04612//Antigen processing and presentation;ko04672//Intestinal immune network for IgA production	K10785	-	-	-
TCONS_00013156	46.7633	0	7.49	0.001	-12.8708	0.00173	0.0344838	yes	-	AAB84319.1 T-cell receptor beta chain, partial [Capra hircus]	-	-	-	-	GO:0044421//extracellular region part;GO:0031988//membrane-bounded vesicle;GO:0031982//vesicle;GO:0005576//extracellular region;GO:0043226//organelle;GO:0043227//membrane-bounded organelle	GO:0016787//hydrolase activity;GO:0004175//endopeptidase activity;GO:0008233//peptidase activity;GO:0070011//peptidase activity, acting on L-amino acid peptides;GO:0003824//catalytic activity	GO:0022411//cellular component disassembly;GO:0044281//small molecule metabolic process;GO:0071840//cellular component organization or biogenesis;GO:0044763//single-organism cellular process;GO:0006767//water-soluble vitamin metabolic process;GO:0044710//single-organism metabolic process;GO:0044699//single-organism process;GO:0009987//cellular process;GO:0071704//organic substance metabolic proce…
TCONS_00013157	177.213	0.746667	16.4833	0.0466667	-8.4644	4.80914e-06	0.000280343	yes	-	AAB84318.1 T-cell receptor beta chain, partial [Capra hircus]	Environmental Information Processing;Organismal Systems	Signal transduction;Signaling molecules and interaction;Immune system	ko04014//Ras signaling pathway;ko04015//Rap1 signaling pathway;ko04020//Calcium signaling pathway;ko04514//Cell adhesion molecules (CAMs);ko04660//T cell receptor signaling pathway;ko04064//NF-kappa B signaling pathway;ko04612//Antigen processing and presentation;ko04672//Intestinal immune network for IgA production	K10785	-	-	-
TCONS_00013159	300.543	0	29.49	0.001	-14.8479	4.45669e-09	6.74719e-07	yes	-	AAB84330.1 T-cell receptor beta chain, partial [Capra hircus]	Environmental Information Processing;Organismal Systems	Immune system;Signaling molecules and interaction;Signal transduction	ko04014//Ras signaling pathway;ko04015//Rap1 signaling pathway;ko04020//Calcium signaling pathway;ko04514//Cell adhesion molecules (CAMs);ko04660//T cell receptor signaling pathway;ko04064//NF-kappa B signaling pathway;ko04612//Antigen processing and presentation;ko04672//Intestinal immune network for IgA production	K10785	-	-	-
TCONS_00013160	83.63	0.78	15.5233	0.09	-7.4303	0.000972832	0.0222397	yes	-	AAD33800.1 T-cell receptor beta chain TCRVB12, partial [Capra hircus]	Environmental Information Processing;Organismal Systems	Signaling molecules and interaction;Signal transduction;Immune system	ko04014//Ras signaling pathway;ko04015//Rap1 signaling pathway;ko04020//Calcium signaling pathway;ko04514//Cell adhesion molecules (CAMs);ko04660//T cell receptor signaling pathway;ko04064//NF-kappa B signaling pathway;ko04612//Antigen processing and presentation;ko04672//Intestinal immune network for IgA production	K10785	-	-	-
TCONS_00013162	68.28	0.713333	11.5467	0.0866667	-7.05778	0.00272081	0.0485579	yes	-	AAB84324.1 T-cell receptor beta chain, partial [Capra hircus]	Environmental Information Processing;Organismal Systems	Signal transduction;Signaling molecules and interaction;Immune system	ko04014//Ras signaling pathway;ko04015//Rap1 signaling pathway;ko04020//Calcium signaling pathway;ko04514//Cell adhesion molecules (CAMs);ko04660//T cell receptor signaling pathway;ko04064//NF-kappa B signaling pathway;ko04612//Antigen processing and presentation;ko04672//Intestinal immune network for IgA production	K10785	-	-	-
TCONS_00013166	118.857	0	13.7567	0.001	-13.7478	3.14505e-05	0.00139986	yes	-	ELR46142.1 hypothetical protein M91_17488, partial [Bos mutus]	Environmental Information Processing;Organismal Systems	Immune system;Signaling molecules and interaction;Signal transduction	ko04014//Ras signaling pathway;ko04015//Rap1 signaling pathway;ko04020//Calcium signaling pathway;ko04514//Cell adhesion molecules (CAMs);ko04660//T cell receptor signaling pathway;ko04064//NF-kappa B signaling pathway;ko04612//Antigen processing and presentation;ko04672//Intestinal immune network for IgA production	K10785	-	-	-
TCONS_00013167	102.04	0	9.83	0.001	-13.263	3.02804e-05	0.0013532	yes	-	XP_005981939.1 PREDICTED: uncharacterized protein LOC102332468 [Pantholops hodgsonii]	Environmental Information Processing;Organismal Systems	Signaling molecules and interaction;Signal transduction;Immune system	ko04014//Ras signaling pathway;ko04015//Rap1 signaling pathway;ko04020//Calcium signaling pathway;ko04514//Cell adhesion molecules (CAMs);ko04660//T cell receptor signaling pathway;ko04064//NF-kappa B signaling pathway;ko04612//Antigen processing and presentation;ko04672//Intestinal immune network for IgA production	K10785	-	-	-
TCONS_00013169	274.17	2.72667	4.05333	0.0266667	-7.24793	8.00415e-06	0.00043394	yes	TCRB	ELR45624.1 hypothetical protein M91_02090, partial [Bos mutus]	Environmental Information Processing;Organismal Systems	Immune system;Signaling molecules and interaction;Signal transduction	ko04014//Ras signaling pathway;ko04015//Rap1 signaling pathway;ko04020//Calcium signaling pathway;ko04514//Cell adhesion molecules (CAMs);ko04660//T cell receptor signaling pathway;ko04064//NF-kappa B signaling pathway;ko04612//Antigen processing and presentation;ko04672//Intestinal immune network for IgA production	K10785	-	-	-
TCONS_00013170	158.94	0	2.38667	0.001	-11.2208	5.35415e-07	4.25559e-05	yes	-	ELR45624.1 hypothetical protein M91_02090, partial [Bos mutus]	-	-	-	-	-	-	-
TCONS_00013172	286.697	1.72333	49.43	0.213333	-7.85613	1.07118e-06	7.88069e-05	yes	TRBV12-3	AAB84322.1 T-cell receptor beta chain, partial [Capra hircus]	-	-	-	-	-	-	-
TCONS_00013176	178.957	3.04667	7.58667	0.09	-6.3974	8.71426e-05	0.00327871	yes	TCRB	AAB88431.1 T-cell receptor beta chain, partial [Ovis aries]	-	-	-	-	-	-	-
TCONS_00013181	594.237	3.88	10.8167	0.0466667	-7.85665	4.82607e-10	1.00849e-07	yes	TCRB	EPY80719.1 hypothetical protein CB1_000804044 [Camelus ferus]	-	-	-	-	-	-	-
TCONS_00013187	47.4733	0.356667	2.46667	0.0133333	-7.53138	0.00205204	0.0391833	yes	V-TCR	XP_010853335.1 PREDICTED: uncharacterized protein LOC104999477 [Bison bison bison]	-	-	-	-	-	-	-
TCONS_00013189	154.86	0	1.71333	0.001	-10.7426	1.26524e-07	1.19567e-05	yes	-	XP_015326296.1 PREDICTED: T-cell receptor beta chain V region CTL-F3 [Bos taurus]	-	-	-	-	-	-	-
TCONS_00013213	135.71	0	4.37667	0.001	-12.0956	6.52525e-06	0.000365262	yes	V-TCR	DAA30221.1 TPA: hypothetical protein BOS_4668 [Bos taurus]	-	-	-	-	-	-	-
TCONS_00013228	197.647	0	12.4867	0.001	-13.6081	1.59937e-07	1.46477e-05	yes	-	XP_014950608.1 PREDICTED: uncharacterized protein LOC101114438 isoform X1 [Ovis aries]	-	-	-	-	-	-	-
TCONS_00013229	102.827	0.746667	9.61333	0.0466667	-7.6865	0.000486923	0.0127789	yes	-	AAB84323.1 T-cell receptor beta chain, partial [Capra hircus]	-	-	-	-	-	-	-
TCONS_00013478	767.71	5.73	59.09	0.283333	-7.70427	2.10174e-13	1.12709e-10	yes	-	AAT65837.4 T cell receptor gamma C4, partial [Bos taurus]	-	-	-	-	-	-	-
TCONS_00013487	1170.7	9.86667	59.6933	0.33	-7.49896	1.58373e-14	1.13697e-11	yes	TRGC1	CAA78310.1 TCR gamma, partial [Ovis aries]	-	-	-	-	-	-	-
TCONS_00013495	65.22	0.666667	6.66667	0.0433333	-7.26534	0.000513661	0.0133135	yes	TRGV3	XP_002704170.1 PREDICTED: T-cell receptor gamma chain V region PT-gamma-1/2 [Bos taurus]	-	-	-	-	-	-	-
TCONS_00013497	210.21	2.12667	3.1	0.02	-7.27612	1.81915e-07	1.63907e-05	yes	TRGV3	ELR45386.1 hypothetical protein M91_10029, partial [Bos mutus]	-	-	-	-	-	-	-
TCONS_00013503	469.17	14.3067	21.5133	0.436667	-5.62255	5.4761e-08	5.72201e-06	yes	-	XP_017902987.1 PREDICTED: uncharacterized protein LOC102191204 [Capra hircus]	-	-	-	-	-	-	-
TCONS_00013507	130.813	4.28667	2.83	0.05	-5.82273	0.00131224	0.0278681	yes	AMPH	XP_017902478.1 PREDICTED: amphiphysin [Capra hircus]	Organismal Systems;Cellular Processes	Immune system;Transport and catabolism	ko04144//Endocytosis;ko04666//Fc gamma R-mediated phagocytosis	K12562	GO:0044444//cytoplasmic part;GO:0071944//cell periphery;GO:0043229//intracellular organelle;GO:0043226//organelle;GO:0005623//cell;GO:0044464//cell part;GO:0016023//cytoplasmic, membrane-bounded vesicle;GO:0043227//membrane-bounded organelle;GO:0005622//intracellular;GO:0005737//cytoplasm;GO:0044424//intracellular part;GO:0044459//plasma membrane part;GO:0031982//vesicle;GO:0005886//plasma membra…	-	GO:0007611//learning or memory;GO:0050877//neurological system process;GO:0032501//multicellular organismal process;GO:0050890//cognition;GO:0044708//single-organism behavior;GO:0006810//transport;GO:0044707//single-multicellular organism process;GO:0044699//single-organism process;GO:0003008//system process;GO:0006897//endocytosis;GO:0007610//behavior;GO:0051234//establishment of localization;GO…
TCONS_00013525	1855.57	4.78667	3.32333	0.00333333	-9.96145	1.40497e-09	2.56293e-07	yes	-	ELR48758.1 hypothetical protein M91_16623 [Bos mutus]	-	-	-	-	-	-	-
TCONS_00013526	350.27	0.543333	0.693333	0.001	-9.43741	1.45752e-05	0.000735377	yes	-	ELR48758.1 hypothetical protein M91_16623 [Bos mutus]	-	-	-	-	-	-	-
TCONS_00013579	429.33	69.5433	37.9567	3.94	-3.26809	0.000566779	0.0144321	yes	h2afv	XP_011968542.1 PREDICTED: histone H2A.V isoform X2 [Ovis aries musimon]	-	-	-	-	GO:0044424//intracellular part;GO:0031988//membrane-bounded vesicle;GO:0044464//cell part;GO:0005623//cell;GO:0043231//intracellular membrane-bounded organelle;GO:0043232//intracellular non-membrane-bounded organelle;GO:0005622//intracellular;GO:0043229//intracellular organelle;GO:0031982//vesicle;GO:0043227//membrane-bounded organelle;GO:0043226//organelle;GO:0043228//non-membrane-bounded organe…	GO:1901363//heterocyclic compound binding;GO:0005515//protein binding;GO:0005488//binding;GO:0097159//organic cyclic compound binding;GO:0003676//nucleic acid binding;GO:0046983//protein dimerization activity	-
TCONS_00013776	3135.94	53.54	72.03	0.766667	-6.55385	2.08971e-14	1.45333e-11	yes	AOAH	XP_017902645.1 PREDICTED: acyloxyacyl hydrolase [Capra hircus]	-	-	-	-	-	GO:0016787//hydrolase activity;GO:0016788//hydrolase activity, acting on ester bonds;GO:0052689//carboxylic ester hydrolase activity;GO:0003824//catalytic activity	GO:0044710//single-organism metabolic process;GO:0048583//regulation of response to stimulus;GO:0008152//metabolic process;GO:0080134//regulation of response to stress;GO:0006629//lipid metabolic process;GO:0031348//negative regulation of defense response;GO:0009987//cellular process;GO:0044763//single-organism cellular process;GO:0044237//cellular metabolic process;GO:0044238//primary metabolic …
TCONS_00014037	119.05	0	1.79	0.001	-10.8057	0.000324917	0.00933036	yes	AHR	XP_017902841.1 PREDICTED: aryl hydrocarbon receptor [Capra hircus]	-	-	-	-	-	-	-
TCONS_00014161	13488	2522.54	214.107	21.4533	-3.31906	6.74097e-05	0.00267297	yes	COL1A2	XP_004007775.1 PREDICTED: collagen alpha-2(I) chain isoform X1 [Ovis aries]	Organismal Systems;Environmental Information Processing;Cellular Processes	Immune system;Digestive system;Cellular commiunity;Signaling molecules and interaction;Signal transduction	ko04151//PI3K-Akt signaling pathway;ko04510//Focal adhesion;ko04611//Platelet activation;ko04974//Protein digestion and absorption;ko04512//ECM-receptor interaction	K06236	GO:0043227//membrane-bounded organelle;GO:0005583//fibrillar collagen trimer;GO:0098644//complex of collagen trimers;GO:0031012//extracellular matrix;GO:0044420//extracellular matrix component;GO:0005576//extracellular region;GO:0043234//protein complex;GO:0031982//vesicle;GO:0032991//macromolecular complex;GO:0031988//membrane-bounded vesicle;GO:0005578//proteinaceous extracellular matrix;GO:004…	GO:0005198//structural molecule activity;GO:0005515//protein binding;GO:0005488//binding;GO:0043169//cation binding;GO:0019838//growth factor binding;GO:0043167//ion binding	GO:0043933//macromolecular complex subunit organization;GO:0007178//transmembrane receptor protein serine/threonine kinase signaling pathway;GO:0065007//biological regulation;GO:0010033//response to organic substance;GO:0044700//single organism signaling;GO:0044767//single-organism developmental process;GO:0003008//system process;GO:0008015//blood circulation;GO:0030198//extracellular matrix orga…
TCONS_00014169	143.14	4.31667	1.8	0.0333333	-5.75489	0.000405113	0.0111444	yes	-	XP_005982306.1 PREDICTED: uncharacterized protein LOC102334977 [Pantholops hodgsonii]	-	-	-	-	-	-	-
TCONS_00014527	570.96	45.6733	12.76	0.736667	-4.11447	0.00243535	0.0446447	yes	CALCOCO1	XP_017903148.1 PREDICTED: calcium-binding and coiled-coil domain-containing protein 1 isoform X3 [Capra hircus]	-	-	-	-	GO:0044424//intracellular part;GO:0005623//cell;GO:0005622//intracellular;GO:0043227//membrane-bounded organelle;GO:0043231//intracellular membrane-bounded organelle;GO:0043226//organelle;GO:0044464//cell part;GO:0043229//intracellular organelle	GO:0005515//protein binding;GO:0001067//regulatory region nucleic acid binding;GO:0000975//regulatory region DNA binding;GO:0003677//DNA binding;GO:0000989//transcription factor activity, transcription factor binding;GO:0097159//organic cyclic compound binding;GO:0003712//transcription cofactor activity;GO:0003713//transcription coactivator activity;GO:0005488//binding;GO:1901363//heterocyclic co…	GO:0050789//regulation of biological process;GO:0019222//regulation of metabolic process;GO:0051171//regulation of nitrogen compound metabolic process;GO:0065007//biological regulation;GO:0023052//signaling;GO:0080090//regulation of primary metabolic process;GO:1903506//regulation of nucleic acid-templated transcription;GO:0006357//regulation of transcription from RNA polymerase II promoter;GO:00…
TCONS_00014592	99.0933	1.38	2.87333	0.0266667	-6.75154	0.000419726	0.0114543	yes	Krt6b	XP_017903208.1 PREDICTED: keratin, type II cytoskeletal 6C [Capra hircus]	-	-	-	-	GO:0005856//cytoskeleton;GO:0045111//intermediate filament cytoskeleton;GO:0005622//intracellular;GO:0044446//intracellular organelle part;GO:0043228//non-membrane-bounded organelle;GO:0005623//cell;GO:0044422//organelle part;GO:0043229//intracellular organelle;GO:0044424//intracellular part;GO:0044430//cytoskeletal part;GO:0099513//polymeric cytoskeletal fiber;GO:0005882//intermediate filament;G…	-	-
TCONS_00014610	0	648.92	0.001	6.74333	12.7192	3.33821e-06	0.000203261	yes	GALNT6	XP_017903239.1 PREDICTED: polypeptide N-acetylgalactosaminyltransferase 6 [Capra hircus]	Metabolism	Global and Overview;Glycan biosynthesis and metabolism	ko01100//Metabolic pathways;ko00512//Mucin type O-glycan biosynthesis	K00710	GO:0031224//intrinsic component of membrane;GO:0044424//intracellular part;GO:0043231//intracellular membrane-bounded organelle;GO:0005623//cell;GO:0043226//organelle;GO:0005622//intracellular;GO:0044464//cell part;GO:0043227//membrane-bounded organelle;GO:0044425//membrane part;GO:0044444//cytoplasmic part;GO:0016020//membrane;GO:0043229//intracellular organelle;GO:0005737//cytoplasm	GO:0016740//transferase activity;GO:0016757//transferase activity, transferring glycosyl groups;GO:0003824//catalytic activity;GO:0008194//UDP-glycosyltransferase activity;GO:0043169//cation binding;GO:0005488//binding;GO:0043167//ion binding;GO:0008376//acetylgalactosaminyltransferase activity;GO:0016758//transferase activity, transferring hexosyl groups	GO:0044237//cellular metabolic process;GO:0043412//macromolecule modification;GO:0006464//cellular protein modification process;GO:0044267//cellular protein metabolic process;GO:0019538//protein metabolic process;GO:0043170//macromolecule metabolic process;GO:0044238//primary metabolic process;GO:0044260//cellular macromolecule metabolic process;GO:0071704//organic substance metabolic process;GO:…
TCONS_00014700	423.077	32.0867	6.69	0.35	-4.25658	6.0212e-05	0.00242977	yes	FMNL3	XP_017903314.1 PREDICTED: formin-like protein 3 isoform X5 [Capra hircus]	-	-	-	-	GO:0005622//intracellular;GO:0005623//cell;GO:0044424//intracellular part;GO:0044464//cell part	GO:0031267//small GTPase binding;GO:0019899//enzyme binding;GO:0017016//Ras GTPase binding;GO:0005515//protein binding;GO:0051020//GTPase binding;GO:0005488//binding	GO:0050793//regulation of developmental process;GO:0065007//biological regulation;GO:0006996//organelle organization;GO:0044763//single-organism cellular process;GO:0022604//regulation of cell morphogenesis;GO:0016043//cellular component organization;GO:0022603//regulation of anatomical structure morphogenesis;GO:0050794//regulation of cellular process;GO:0007010//cytoskeleton organization;GO:005…
TCONS_00014787	2988.72	350.257	45.33	3.61667	-3.64773	1.52608e-05	0.0007615	yes	HDAC7	XP_017903367.1 PREDICTED: histone deacetylase 7 isoform X5 [Capra hircus]	-	-	-	-	GO:0005622//intracellular;GO:0005623//cell;GO:0043226//organelle;GO:0043227//membrane-bounded organelle;GO:0043231//intracellular membrane-bounded organelle;GO:0043229//intracellular organelle;GO:0044464//cell part;GO:0044424//intracellular part	GO:0016810//hydrolase activity, acting on carbon-nitrogen (but not peptide) bonds;GO:0019899//enzyme binding;GO:0003712//transcription cofactor activity;GO:0034979//NAD-dependent protein deacetylase activity;GO:0000989//transcription factor activity, transcription factor binding;GO:0005515//protein binding;GO:0043167//ion binding;GO:0000988//transcription factor activity, protein binding;GO:00199…	GO:0034329//cell junction assembly;GO:0006996//organelle organization;GO:0071840//cellular component organization or biogenesis;GO:0044707//single-multicellular organism process;GO:0019219//regulation of nucleobase-containing compound metabolic process;GO:0051252//regulation of RNA metabolic process;GO:0010468//regulation of gene expression;GO:0008152//metabolic process;GO:0043170//macromolecule …
TCONS_00014871	625.633	3.82	8.40667	0.0333333	-7.97842	1.58374e-09	2.87724e-07	yes	ABCD2	XP_012029897.1 PREDICTED: ATP-binding cassette sub-family D member 2 isoform X1 [Ovis aries]	Environmental Information Processing;Cellular Processes	Membrane transport;Transport and catabolism	ko04146//Peroxisome;ko02010//ABC transporters	K05676	GO:0005622//intracellular;GO:0044425//membrane part;GO:0043226//organelle;GO:0031224//intrinsic component of membrane;GO:0043227//membrane-bounded organelle;GO:0044424//intracellular part;GO:0016020//membrane;GO:0043229//intracellular organelle;GO:0044444//cytoplasmic part;GO:0043231//intracellular membrane-bounded organelle;GO:0005623//cell;GO:0044464//cell part;GO:0042579//microbody;GO:0005737/…	GO:0022804//active transmembrane transporter activity;GO:0016817//hydrolase activity, acting on acid anhydrides;GO:0015405//P-P-bond-hydrolysis-driven transmembrane transporter activity;GO:0005215//transporter activity;GO:0097367//carbohydrate derivative binding;GO:0001882//nucleoside binding;GO:0032550//purine ribonucleoside binding;GO:0015399//primary active transmembrane transporter activity;G…	GO:0044237//cellular metabolic process;GO:0031329//regulation of cellular catabolic process;GO:0009894//regulation of catabolic process;GO:0006082//organic acid metabolic process;GO:0009056//catabolic process;GO:0019222//regulation of metabolic process;GO:0044282//small molecule catabolic process;GO:0016042//lipid catabolic process;GO:0072329//monocarboxylic acid catabolic process;GO:0044281//sma…
TCONS_00015104	334.923	29.8833	2.54	0.146667	-4.11422	7.26281e-05	0.00284646	yes	AGAP2	XP_012030037.1 PREDICTED: arf-GAP with GTPase, ANK repeat and PH domain-containing protein 2 isoform X2 [Ovis aries]	Cellular Processes;Environmental Information Processing	Transport and catabolism;Signal transduction	ko04144//Endocytosis;ko04068//FoxO signaling pathway	K17848	GO:0043226//organelle;GO:0031982//vesicle;GO:0043227//membrane-bounded organelle;GO:0044424//intracellular part;GO:0043228//non-membrane-bounded organelle;GO:0031988//membrane-bounded vesicle;GO:0043232//intracellular non-membrane-bounded organelle;GO:0043231//intracellular membrane-bounded organelle;GO:0005622//intracellular;GO:0044464//cell part;GO:0005623//cell;GO:0043229//intracellular organe…	GO:0005488//binding;GO:0043167//ion binding;GO:0019887//protein kinase regulator activity;GO:0036094//small molecule binding;GO:0046914//transition metal ion binding;GO:0030234//enzyme regulator activity;GO:0019899//enzyme binding;GO:0005515//protein binding;GO:0019207//kinase regulator activity;GO:0046872//metal ion binding;GO:0043169//cation binding;GO:0008047//enzyme activator activity;GO:0019…	GO:0044767//single-organism developmental process;GO:0010941//regulation of cell death;GO:0051234//establishment of localization;GO:0048812//neuron projection morphogenesis;GO:0042325//regulation of phosphorylation;GO:0006928//movement of cell or subcellular component;GO:0051239//regulation of multicellular organismal process;GO:0006935//chemotaxis;GO:0097190//apoptotic signaling pathway;GO:00311…
TCONS_00015277	539.787	12.23	19.6567	0.283333	-6.11637	6.58315e-10	1.32586e-07	yes	TESPA1	XP_005680521.1 PREDICTED: protein TESPA1 isoform X2 [Capra hircus]	-	-	-	-	GO:0005623//cell;GO:0044464//cell part;GO:0044424//intracellular part;GO:0005622//intracellular;GO:0043234//protein complex;GO:0032991//macromolecular complex	-	GO:0034110//regulation of homotypic cell-cell adhesion;GO:0002694//regulation of leukocyte activation;GO:0044085//cellular component biogenesis;GO:0045580//regulation of T cell differentiation;GO:0050863//regulation of T cell activation;GO:1903037//regulation of leukocyte cell-cell adhesion;GO:0065003//macromolecular complex assembly;GO:0071840//cellular component organization or biogenesis;GO:00…
TCONS_00015542	51.71	0	1.06333	0.001	-10.0544	0.000648168	0.0160456	yes	APOL3	XP_013832221.1 PREDICTED: apolipoprotein L3 [Capra hircus]	-	-	-	-	-	-	-
TCONS_00015549	286.017	11.4433	5.60667	0.133333	-5.39403	2.21932e-06	0.000145481	yes	APOL3	XP_017903766.1 PREDICTED: apolipoprotein L3-like [Capra hircus]	-	-	-	-	-	-	-
TCONS_00015857	29.1	0	1.35	0.001	-10.3987	0.00278923	0.0493829	yes	CLEC2D	XP_005680916.1 PREDICTED: C-type lectin domain family 2 member F-like [Capra hircus]	-	-	-	-	-	-	-
TCONS_00015866	1266.66	54.4267	5.29333	0.123333	-5.42354	4.02585e-09	6.24874e-07	yes	gag	CAA10770.1 reverse transcriptase-like [Bos taurus]	-	-	-	-	GO:0044464//cell part;GO:0005623//cell;GO:0031252//cell leading edge;GO:0030054//cell junction;GO:0070161//anchoring junction	GO:0008092//cytoskeletal protein binding;GO:0005515//protein binding;GO:0050839//cell adhesion molecule binding;GO:0003779//actin binding;GO:0005488//binding	GO:0007155//cell adhesion;GO:0098602//single organism cell adhesion;GO:0044699//single-organism process;GO:0022610//biological adhesion
TCONS_00015873	835.83	35.46	2.30667	0.0566667	-5.34717	7.04476e-09	9.95435e-07	yes	Clec2h	XP_004007616.2 PREDICTED: C-type lectin domain family 2 member D11-like isoform X1 [Ovis aries]	-	-	-	-	-	-	-
TCONS_00015957	413.42	0	13.1967	0.001	-13.6879	3.61024e-06	0.000216858	yes	C1R	XP_005680978.2 PREDICTED: complement C1r subcomponent [Capra hircus]	Organismal Systems;Cellular Processes	Transport and catabolism;Immune system	ko04145//Phagosome;ko04610//Complement and coagulation cascades	K01330	GO:0043227//membrane-bounded organelle;GO:0005576//extracellular region;GO:0031988//membrane-bounded vesicle;GO:0031982//vesicle;GO:0044421//extracellular region part;GO:0043226//organelle	GO:0005488//binding;GO:0003824//catalytic activity;GO:0016787//hydrolase activity;GO:0043169//cation binding;GO:0043167//ion binding;GO:0046872//metal ion binding	GO:0019538//protein metabolic process;GO:0002252//immune effector process;GO:0044238//primary metabolic process;GO:0008152//metabolic process;GO:0043170//macromolecule metabolic process;GO:0002376//immune system process;GO:0071704//organic substance metabolic process
TCONS_00015995	1306.7	67.5733	11.1233	0.39	-4.83397	4.46487e-08	4.8119e-06	yes	LPAR5	XP_017904063.1 PREDICTED: lysophosphatidic acid receptor 5 [Capra hircus]	Environmental Information Processing	Signal transduction	ko04151//PI3K-Akt signaling pathway;ko04015//Rap1 signaling pathway;ko04072//Phospholipase D signaling pathway	K08390	GO:0031224//intrinsic component of membrane;GO:0044425//membrane part;GO:0016020//membrane	GO:0004871//signal transducer activity	GO:0007154//cell communication;GO:0050789//regulation of biological process;GO:0044763//single-organism cellular process;GO:0050794//regulation of cellular process;GO:0050896//response to stimulus;GO:0009987//cellular process;GO:0044699//single-organism process;GO:0044700//single organism signaling;GO:0007165//signal transduction;GO:0051716//cellular response to stimulus;GO:0023052//signaling;GO:…
TCONS_00016058	478.973	117.627	5.19	0.776667	-2.74037	0.000730059	0.0176315	yes	PARP11	XP_005207248.1 PREDICTED: poly [ADP-ribose] polymerase 11 isoform X2 [Bos taurus]	-	-	-	-	-	-	-
TCONS_00016073	619.343	4.04667	11.53	0.0533333	-7.75614	6.52822e-09	9.37326e-07	yes	Foxm1	XP_011995918.1 PREDICTED: forkhead box protein M1 isoform X1 [Ovis aries musimon]	-	-	-	-	-	-	-
TCONS_00016154	1585.55	73.0333	4.98333	0.14	-5.15361	1.22572e-09	2.2923e-07	yes	CACNA1C	XP_017904188.1 PREDICTED: voltage-dependent L-type calcium channel subunit alpha-1C isoform X9 [Capra hircus]	Organismal Systems;Environmental Information Processing	Circulatory system;Endocrine system;Signal transduction;Environmental adaptation;Nervous system;Sensory system	ko04010//MAPK signaling pathway;ko04024//cAMP signaling pathway;ko04020//Calcium signaling pathway;ko04921//Oxytocin signaling pathway;ko04022//cGMP - PKG signaling pathway;ko04261//Adrenergic signaling in cardiomyocytes;ko04270//Vascular smooth muscle contraction;ko04728//Dopaminergic synapse;ko04724//Glutamatergic synapse;ko04726//Serotonergic synapse;ko04725//Cholinergic synapse;ko04713//Circa…	K04850	-	-	-
TCONS_00016241	291.037	45.1867	9.21	0.913333	-3.33399	0.000756413	0.0181303	yes	APOBEC3C	XP_006071499.1 PREDICTED: uncharacterized protein LOC102405577 [Bubalus bubalis]	-	-	-	-	-	GO:0046872//metal ion binding;GO:0046914//transition metal ion binding;GO:0043167//ion binding;GO:0016810//hydrolase activity, acting on carbon-nitrogen (but not peptide) bonds;GO:0016787//hydrolase activity;GO:0043169//cation binding;GO:0005488//binding;GO:0003824//catalytic activity	GO:0032502//developmental process;GO:0048513//animal organ development;GO:0007275//multicellular organism development;GO:0048534//hematopoietic or lymphoid organ development;GO:0002520//immune system development;GO:0032501//multicellular organismal process;GO:0002376//immune system process;GO:0048731//system development;GO:0044699//single-organism process;GO:0048856//anatomical structure developm…
TCONS_00016379	789.61	11.4633	12.8267	0.133333	-6.58796	1.43256e-06	0.000101051	yes	PARVB	XP_005958527.1 PREDICTED: beta-parvin isoform X1 [Pantholops hodgsonii]	Cellular Processes	Cellular commiunity	ko04510//Focal adhesion	K06275	GO:0044464//cell part;GO:0005912//adherens junction;GO:0031252//cell leading edge;GO:0070161//anchoring junction;GO:0030054//cell junction;GO:0030055//cell-substrate junction;GO:0005924//cell-substrate adherens junction;GO:0005623//cell	-	GO:0071840//cellular component organization or biogenesis;GO:1902589//single-organism organelle organization;GO:0009987//cellular process;GO:0030030//cell projection organization;GO:0006996//organelle organization;GO:0030036//actin cytoskeleton organization;GO:0022610//biological adhesion;GO:0007163//establishment or maintenance of cell polarity;GO:0016043//cellular component organization;GO:0044…
TCONS_00016412	128.537	0.136667	1.20667	0.001	-10.2368	0.000291426	0.00855631	yes	PPARA	XP_017904394.1 PREDICTED: peroxisome proliferator-activated receptor alpha isoform X2 [Capra hircus]	Environmental Information Processing;Organismal Systems	Signal transduction;Endocrine system	ko04024//cAMP signaling pathway;ko04922//Glucagon signaling pathway;ko03320//PPAR signaling pathway;ko04920//Adipocytokine signaling pathway	K07294	GO:0043226//organelle;GO:0044464//cell part;GO:0043227//membrane-bounded organelle;GO:0043229//intracellular organelle;GO:0005623//cell;GO:0044424//intracellular part;GO:0005622//intracellular;GO:0043231//intracellular membrane-bounded organelle	GO:0003676//nucleic acid binding;GO:0008134//transcription factor binding;GO:0043565//sequence-specific DNA binding;GO:0001076//transcription factor activity, RNA polymerase II transcription factor binding;GO:0001012//RNA polymerase II regulatory region DNA binding;GO:0005488//binding;GO:0019899//enzyme binding;GO:0046914//transition metal ion binding;GO:0044390//ubiquitin-like protein conjugatin…	GO:0044699//single-organism process;GO:0009719//response to endogenous stimulus;GO:0009891//positive regulation of biosynthetic process;GO:0032096//negative regulation of response to food;GO:0006357//regulation of transcription from RNA polymerase II promoter;GO:0010888//negative regulation of lipid storage;GO:0045893//positive regulation of transcription, DNA-templated;GO:0032095//regulation of …
TCONS_00016445	1286.11	152.49	7.74333	0.51	-3.92439	1.78861e-05	0.00087197	yes	Clec2d11	XP_017904415.1 PREDICTED: C-type lectin domain family 2 member E [Capra hircus]	-	-	-	-	-	-	-
TCONS_00016446	2155.49	107.717	13.4633	0.373333	-5.17243	1.96684e-10	4.60759e-08	yes	Clec2d11	XP_012770936.1 hypothetical protein, conserved [Babesia bigemina]	-	-	-	-	-	GO:0005515//protein binding;GO:0005488//binding	GO:0022610//biological adhesion;GO:0007155//cell adhesion
TCONS_00017036	148.93	4.20667	2.59333	0.05	-5.69674	0.00017807	0.00578111	yes	ASIC1	XP_004778896.1 PREDICTED: acid-sensing ion channel 1 isoform X3 [Mustela putorius furo]	Organismal Systems	Sensory system	ko04750//Inflammatory mediator regulation of TRP channels	K04829	GO:0016020//membrane;GO:0031224//intrinsic component of membrane;GO:0044425//membrane part;GO:0016021//integral component of membrane	GO:0022892//substrate-specific transporter activity;GO:0005272//sodium channel activity;GO:0005216//ion channel activity;GO:0015075//ion transmembrane transporter activity;GO:0022857//transmembrane transporter activity;GO:0022890//inorganic cation transmembrane transporter activity;GO:0005215//transporter activity;GO:0022836//gated channel activity;GO:0015077//monovalent inorganic cation transmem…	GO:0044699//single-organism process;GO:0065008//regulation of biological quality;GO:0006816//calcium ion transport;GO:0010646//regulation of cell communication;GO:0009628//response to abiotic stimulus;GO:0009268//response to pH;GO:0070838//divalent metal ion transport;GO:0050794//regulation of cellular process;GO:0006814//sodium ion transport;GO:0032501//multicellular organismal process;GO:006034…
TCONS_00017064	32.5433	0	0.946667	0.001	-9.88671	0.00202978	0.0388248	yes	TROAP	XP_017903327.1 PREDICTED: tastin isoform X1 [Capra hircus]	-	-	-	-	-	-	-
TCONS_00017204	760.16	10.6133	5.31667	0.0433333	-6.9389	2.16023e-06	0.000142236	yes	LRRK2	XP_014949420.1 PREDICTED: leucine-rich repeat serine/threonine-protein kinase 2 isoform X1 [Ovis aries]	-	-	-	-	GO:0031975//envelope;GO:0016020//membrane;GO:0005740//mitochondrial envelope;GO:0097458//neuron part;GO:0031982//vesicle;GO:0031966//mitochondrial membrane;GO:0031410//cytoplasmic vesicle;GO:0098589//membrane region;GO:0044429//mitochondrial part;GO:0044464//cell part;GO:0043227//membrane-bounded organelle;GO:0043229//intracellular organelle;GO:0044422//organelle part;GO:0099568//cytoplasmic regi…	GO:0004857//enzyme inhibitor activity;GO:0004674//protein serine/threonine kinase activity;GO:0016818//hydrolase activity, acting on acid anhydrides, in phosphorus-containing anhydrides;GO:0005515//protein binding;GO:0031267//small GTPase binding;GO:0032549//ribonucleoside binding;GO:0017016//Ras GTPase binding;GO:0003824//catalytic activity;GO:0032550//purine ribonucleoside binding;GO:0017111//n…	GO:0044699//single-organism process;GO:0007186//G-protein coupled receptor signaling pathway;GO:0071242//cellular response to ammonium ion;GO:0010647//positive regulation of cell communication;GO:0006793//phosphorus metabolic process;GO:0032501//multicellular organismal process;GO:0065007//biological regulation;GO:0050808//synapse organization;GO:0044708//single-organism behavior;GO:0051649//esta…
TCONS_00018210	116.713	1.08	1.46333	0.01	-7.19311	1.03499e-05	0.00054389	yes	-	ELR51705.1 hypothetical protein M91_10420, partial [Bos mutus]	-	-	-	-	-	-	-
TCONS_00018335	98.13	0	1.00667	0.001	-9.97537	1.4375e-05	0.000729568	yes	GPR162	XP_017904045.1 PREDICTED: probable G-protein coupled receptor 162 [Capra hircus]	-	-	-	-	-	-	-
TCONS_00018353	2205	0	26.0733	0.001	-14.6703	1.04214e-17	1.76051e-14	yes	NCAPD2	XP_017904081.1 PREDICTED: condensin complex subunit 1 [Capra hircus]	-	-	-	-	GO:0005634//nucleus;GO:0044464//cell part;GO:0000793//condensed chromosome;GO:0043229//intracellular organelle;GO:0043232//intracellular non-membrane-bounded organelle;GO:0043227//membrane-bounded organelle;GO:0044424//intracellular part;GO:0043231//intracellular membrane-bounded organelle;GO:0005623//cell;GO:0043226//organelle;GO:0005622//intracellular;GO:0005694//chromosome;GO:0043228//non-memb…	-	GO:0016043//cellular component organization;GO:0044699//single-organism process;GO:0009987//cellular process;GO:0007049//cell cycle;GO:0006996//organelle organization;GO:0051276//chromosome organization;GO:0048285//organelle fission;GO:0000280//nuclear division;GO:0022402//cell cycle process;GO:0071840//cellular component organization or biogenesis;GO:0044763//single-organism cellular process
TCONS_00018359	3298.37	551.713	82.17	9.01667	-3.18795	2.07951e-05	0.000982581	yes	CD27	XP_005681032.1 PREDICTED: CD27 antigen isoform X2 [Capra hircus]	Environmental Information Processing	Signaling molecules and interaction	ko04060//Cytokine-cytokine receptor interaction	K05144	GO:0031982//vesicle;GO:0043226//organelle;GO:0031988//membrane-bounded vesicle;GO:0005623//cell;GO:0044464//cell part;GO:0043227//membrane-bounded organelle	GO:0004869//cysteine-type endopeptidase inhibitor activity;GO:0004857//enzyme inhibitor activity;GO:0061135//endopeptidase regulator activity;GO:0004866//endopeptidase inhibitor activity;GO:0030234//enzyme regulator activity;GO:0030414//peptidase inhibitor activity;GO:0061134//peptidase regulator activity;GO:0098772//molecular function regulator	GO:0048584//positive regulation of response to stimulus;GO:0010562//positive regulation of phosphorus metabolic process;GO:0044700//single organism signaling;GO:0048522//positive regulation of cellular process;GO:0032270//positive regulation of cellular protein metabolic process;GO:0007165//signal transduction;GO:0050789//regulation of biological process;GO:0043066//negative regulation of apoptot…
TCONS_00018379	101.877	1.86667	0.883333	0.01	-6.46489	0.000355603	0.0100686	yes	KCNA1	XP_014961913.1 PREDICTED: potassium voltage-gated channel subfamily A member 1 isoform X2 [Ovis aries musimon]	-	-	-	-	GO:0044463//cell projection part;GO:0043005//neuron projection;GO:0005623//cell;GO:0034702//ion channel complex;GO:0030424//axon;GO:0031224//intrinsic component of membrane;GO:0034703//cation channel complex;GO:0097458//neuron part;GO:0098796//membrane protein complex;GO:0044297//cell body;GO:0034705//potassium channel complex;GO:0016021//integral component of membrane;GO:0044425//membrane part;G…	GO:0046873//metal ion transmembrane transporter activity;GO:0022838//substrate-specific channel activity;GO:0022892//substrate-specific transporter activity;GO:0022803//passive transmembrane transporter activity;GO:0022857//transmembrane transporter activity;GO:0015075//ion transmembrane transporter activity;GO:0008324//cation transmembrane transporter activity;GO:0005267//potassium channel activ…	GO:0071822//protein complex subunit organization;GO:0006812//cation transport;GO:0051259//protein oligomerization;GO:0065003//macromolecular complex assembly;GO:0070271//protein complex biogenesis;GO:0006461//protein complex assembly;GO:0051234//establishment of localization;GO:0071840//cellular component organization or biogenesis;GO:0043933//macromolecular complex subunit organization;GO:001604…
TCONS_00018652	0	98.8133	0.001	0.366667	8.51833	0.000198429	0.00629964	yes	TCF20	XP_017904338.1 PREDICTED: transcription factor 20 isoform X3 [Capra hircus]	-	-	-	-	-	GO:0046872//metal ion binding;GO:0046914//transition metal ion binding;GO:0097159//organic cyclic compound binding;GO:0003676//nucleic acid binding;GO:0005488//binding;GO:1901363//heterocyclic compound binding;GO:0043169//cation binding;GO:0003723//RNA binding;GO:0043167//ion binding	-
TCONS_00018831	1325.46	358.683	40.7933	7.43	-2.4569	0.00154451	0.0315928	yes	Sbf1	XP_011965343.1 PREDICTED: myotubularin-related protein 5 isoform X4 [Ovis aries musimon]	-	-	-	-	-	GO:0016787//hydrolase activity;GO:0005088//Ras guanyl-nucleotide exchange factor activity;GO:0098772//molecular function regulator;GO:0003824//catalytic activity;GO:0005085//guanyl-nucleotide exchange factor activity;GO:0042578//phosphoric ester hydrolase activity;GO:0016788//hydrolase activity, acting on ester bonds	GO:0008152//metabolic process;GO:0044237//cellular metabolic process;GO:0050790//regulation of catalytic activity;GO:0006796//phosphate-containing compound metabolic process;GO:0050789//regulation of biological process;GO:0006793//phosphorus metabolic process;GO:0065007//biological regulation;GO:0065009//regulation of molecular function;GO:0019222//regulation of metabolic process;GO:0051336//regu…
TCONS_00018910	156.74	9.73	13.6233	0.496667	-4.77766	0.000268927	0.00801738	yes	MAD2L1	XP_002815141.1 PREDICTED: mitotic spindle assembly checkpoint protein MAD2A [Pongo abelii]	Organismal Systems;Cellular Processes	Endocrine system;Cell growth and death	ko04110//Cell cycle;ko04114//Oocyte meiosis;ko04914//Progesterone-mediated oocyte maturation	K02537	GO:0044422//organelle part;GO:0044446//intracellular organelle part;GO:0043231//intracellular membrane-bounded organelle;GO:0044427//chromosomal part;GO:0043229//intracellular organelle;GO:0043226//organelle;GO:0044430//cytoskeletal part;GO:0043228//non-membrane-bounded organelle;GO:0043234//protein complex;GO:0044464//cell part;GO:0005623//cell;GO:0043227//membrane-bounded organelle;GO:0016021//…	GO:0005515//protein binding;GO:0046983//protein dimerization activity;GO:0005488//binding	GO:1903362//regulation of cellular protein catabolic process;GO:0045931//positive regulation of mitotic cell cycle;GO:0031329//regulation of cellular catabolic process;GO:1903050//regulation of proteolysis involved in cellular protein catabolic process;GO:0009987//cellular process;GO:0009895//negative regulation of catabolic process;GO:0031577//spindle checkpoint;GO:0031324//negative regulation o…
TCONS_00019436	1829.27	55.77	28.03	0.55	-5.6714	3.01589e-06	0.000187221	yes	RHOH	XP_003364774.1 PREDICTED: rho-related GTP-binding protein RhoH [Equus caballus]	Organismal Systems	Immune system	ko04670//Leukocyte transendothelial migration	K07873	GO:0005886//plasma membrane;GO:0044444//cytoplasmic part;GO:0016020//membrane;GO:0044425//membrane part;GO:0071944//cell periphery;GO:0044459//plasma membrane part;GO:0005622//intracellular;GO:0005737//cytoplasm;GO:0044424//intracellular part;GO:0005623//cell;GO:0044464//cell part	GO:0017016//Ras GTPase binding;GO:0031267//small GTPase binding;GO:0036094//small molecule binding;GO:1901363//heterocyclic compound binding;GO:0004857//enzyme inhibitor activity;GO:0051020//GTPase binding;GO:0032550//purine ribonucleoside binding;GO:0001883//purine nucleoside binding;GO:0097367//carbohydrate derivative binding;GO:0005488//binding;GO:0030234//enzyme regulator activity;GO:0032549/…	GO:0031323//regulation of cellular metabolic process;GO:0032502//developmental process;GO:0044763//single-organism cellular process;GO:0051174//regulation of phosphorus metabolic process;GO:0023051//regulation of signaling;GO:0009892//negative regulation of metabolic process;GO:0048583//regulation of response to stimulus;GO:0010646//regulation of cell communication;GO:0001775//cell activation;GO:…
TCONS_00019482	44.3333	0	0.583333	0.001	-9.18818	0.000640708	0.0158963	yes	ATP10D	XP_017904907.1 PREDICTED: probable phospholipid-transporting ATPase VD isoform X1 [Capra hircus]	-	-	-	-	-	-	-
TCONS_00019771	494.753	70.9667	3.26	0.26	-3.64829	0.000391997	0.0108777	yes	-	ELR61013.1 hypothetical protein M91_09415, partial [Bos mutus]	-	-	-	-	-	-	-
TCONS_00020016	64.2133	0	0.883333	0.001	-9.78681	0.000231693	0.00713678	yes	SORCS2	XP_017905263.1 PREDICTED: VPS10 domain-containing receptor SorCS2 [Capra hircus]	-	-	-	-	GO:0031224//intrinsic component of membrane;GO:0044425//membrane part;GO:0016020//membrane	GO:0060089//molecular transducer activity;GO:0004871//signal transducer activity;GO:0004872//receptor activity;GO:0001653//peptide receptor activity;GO:0099600//transmembrane receptor activity;GO:0004930//G-protein coupled receptor activity;GO:0004888//transmembrane signaling receptor activity;GO:0008528//G-protein coupled peptide receptor activity;GO:0038023//signaling receptor activity	GO:0050794//regulation of cellular process;GO:0050789//regulation of biological process;GO:0044700//single organism signaling;GO:0051716//cellular response to stimulus;GO:0007154//cell communication;GO:0009987//cellular process;GO:0044699//single-organism process;GO:0007186//G-protein coupled receptor signaling pathway;GO:0044763//single-organism cellular process;GO:0023052//signaling;GO:0050896/…
TCONS_00020056	87.5567	0	0.86	0.001	-9.74819	2.77006e-05	0.00124793	yes	Dok7	XP_017905418.1 PREDICTED: protein Dok-7 [Capra hircus]	-	-	-	-	GO:0045202//synapse	GO:0019899//enzyme binding;GO:0005515//protein binding;GO:0005543//phospholipid binding;GO:0008289//lipid binding;GO:0005488//binding;GO:0019900//kinase binding;GO:0043168//anion binding;GO:0043167//ion binding	GO:1902580//single-organism cellular localization;GO:0031323//regulation of cellular metabolic process;GO:0051246//regulation of protein metabolic process;GO:0044763//single-organism cellular process;GO:0044093//positive regulation of molecular function;GO:0001934//positive regulation of protein phosphorylation;GO:0009893//positive regulation of metabolic process;GO:0051247//positive regulation o…
TCONS_00020057	158.11	8.34333	14.1367	0.49	-4.85052	0.00195453	0.0377752	yes	TACC3	XP_017905295.1 PREDICTED: transforming acidic coiled-coil-containing protein 3 [Capra hircus]	Genetic Information Processing	Translation	ko03013//RNA transport	K14283	GO:0044464//cell part;GO:0044430//cytoskeletal part;GO:0044446//intracellular organelle part;GO:0043228//non-membrane-bounded organelle;GO:0005623//cell;GO:0044422//organelle part;GO:0005815//microtubule organizing center;GO:0005622//intracellular;GO:0005856//cytoskeleton;GO:0044424//intracellular part;GO:0015630//microtubule cytoskeleton;GO:0043232//intracellular non-membrane-bounded organelle;G…	GO:0005488//binding;GO:0005515//protein binding	GO:0051640//organelle localization;GO:1903533//regulation of protein targeting;GO:0065007//biological regulation;GO:1903650//negative regulation of cytoplasmic transport;GO:0048856//anatomical structure development;GO:1903827//regulation of cellular protein localization;GO:0044767//single-organism developmental process;GO:0007010//cytoskeleton organization;GO:0032387//negative regulation of intra…
TCONS_00020061	673.643	138.117	16.8367	2.31	-2.86564	0.00128961	0.0275633	yes	WHSC1	XP_017905306.1 PREDICTED: histone-lysine N-methyltransferase NSD2 isoform X2 [Capra hircus]	Metabolism	Amino acid metabolism	ko00310//Lysine degradation	K11424	GO:0043226//organelle;GO:0043229//intracellular organelle;GO:0043228//non-membrane-bounded organelle;GO:0005623//cell;GO:0016020//membrane;GO:0031090//organelle membrane;GO:0044464//cell part;GO:0043232//intracellular non-membrane-bounded organelle;GO:0044422//organelle part;GO:0005622//intracellular;GO:0044424//intracellular part;GO:0043231//intracellular membrane-bounded organelle;GO:0043227//m…	GO:0003676//nucleic acid binding;GO:0043169//cation binding;GO:0005488//binding;GO:0016279//protein-lysine N-methyltransferase activity;GO:0008757//S-adenosylmethionine-dependent methyltransferase activity;GO:0008168//methyltransferase activity;GO:0043167//ion binding;GO:0016741//transferase activity, transferring one-carbon groups;GO:1901363//heterocyclic compound binding;GO:0046872//metal ion b…	GO:0065007//biological regulation;GO:0072358//cardiovascular system development;GO:0045935//positive regulation of nucleobase-containing compound metabolic process;GO:0080090//regulation of primary metabolic process;GO:0048513//animal organ development;GO:0003283//atrial septum development;GO:0044699//single-organism process;GO:0044260//cellular macromolecule metabolic process;GO:0002705//positiv…
TCONS_00020063	288.39	26.4833	2.52333	0.146667	-4.10472	4.66372e-05	0.00194913	yes	WHSC1	XP_017905307.1 PREDICTED: histone-lysine N-methyltransferase NSD2 isoform X3 [Capra hircus]	Metabolism	Amino acid metabolism	ko00310//Lysine degradation	K11424	GO:0005622//intracellular;GO:0043231//intracellular membrane-bounded organelle;GO:0044424//intracellular part;GO:0031090//organelle membrane;GO:0043232//intracellular non-membrane-bounded organelle;GO:0044422//organelle part;GO:0043229//intracellular organelle;GO:0043226//organelle;GO:0043228//non-membrane-bounded organelle;GO:0044464//cell part;GO:0016020//membrane;GO:0005623//cell;GO:0043227//m…	GO:0005488//binding;GO:0016740//transferase activity;GO:1901363//heterocyclic compound binding;GO:0003677//DNA binding;GO:0003824//catalytic activity;GO:0043169//cation binding;GO:0003676//nucleic acid binding;GO:0043167//ion binding;GO:0046914//transition metal ion binding;GO:0016279//protein-lysine N-methyltransferase activity;GO:0008757//S-adenosylmethionine-dependent methyltransferase activit…	GO:0051052//regulation of DNA metabolic process;GO:0048856//anatomical structure development;GO:0002821//positive regulation of adaptive immune response;GO:0050865//regulation of cell activation;GO:0016570//histone modification;GO:0044699//single-organism process;GO:0002714//positive regulation of B cell mediated immunity;GO:0006464//cellular protein modification process;GO:0006259//DNA metabolic…
TCONS_00020216	182.793	2896.31	1.27667	10.45	3.03305	0.00131543	0.027894	yes	ANK2	XP_017904694.1 PREDICTED: ankyrin-2 isoform X1 [Capra hircus]	-	-	-	-	GO:0044449//contractile fiber part;GO:0005737//cytoplasm;GO:0005623//cell;GO:0016020//membrane;GO:0044459//plasma membrane part;GO:0005886//plasma membrane;GO:0044425//membrane part;GO:0005622//intracellular;GO:0043229//intracellular organelle;GO:0044464//cell part;GO:0030017//sarcomere;GO:0071944//cell periphery;GO:0044422//organelle part;GO:0005911//cell-cell junction;GO:0044291//cell-cell cont…	GO:0008092//cytoskeletal protein binding;GO:0098772//molecular function regulator;GO:0005488//binding;GO:0019900//kinase binding;GO:0016247//channel regulator activity;GO:0019899//enzyme binding;GO:0005515//protein binding	GO:0044699//single-organism process;GO:0044707//single-multicellular organism process;GO:0086065//cell communication involved in cardiac conduction;GO:0006813//potassium ion transport;GO:0032844//regulation of homeostatic process;GO:0060048//cardiac muscle contraction;GO:0006936//muscle contraction;GO:0044767//single-organism developmental process;GO:0006605//protein targeting;GO:0065009//regulat…
TCONS_00020218	5.63667	786.917	0.04	2.83	6.14466	7.44938e-05	0.00290107	yes	ANK2	XP_017904694.1 PREDICTED: ankyrin-2 isoform X1 [Capra hircus]	-	-	-	-	GO:0044459//plasma membrane part;GO:0044291//cell-cell contact zone;GO:0043228//non-membrane-bounded organelle;GO:0044422//organelle part;GO:0005911//cell-cell junction;GO:0044444//cytoplasmic part;GO:0005737//cytoplasm;GO:0044464//cell part;GO:0043292//contractile fiber;GO:0016021//integral component of membrane;GO:0031674//I band;GO:0016020//membrane;GO:0043229//intracellular organelle;GO:00300…	GO:0005488//binding;GO:0019900//kinase binding;GO:0098772//molecular function regulator;GO:0016247//channel regulator activity;GO:0019899//enzyme binding;GO:0008092//cytoskeletal protein binding;GO:0005515//protein binding	GO:0003013//circulatory system process;GO:0086001//cardiac muscle cell action potential;GO:0044763//single-organism cellular process;GO:0051641//cellular localization;GO:1990778//protein localization to cell periphery;GO:0072359//circulatory system development;GO:0008015//blood circulation;GO:0032411//positive regulation of transporter activity;GO:0090150//establishment of protein localization to…
TCONS_00020219	0	383.267	0.001	1.38	10.4305	1.41891e-07	1.30757e-05	yes	ANK2	XP_017904695.1 PREDICTED: ankyrin-2 isoform X2 [Capra hircus]	-	-	-	-	GO:0043232//intracellular non-membrane-bounded organelle;GO:0043292//contractile fiber;GO:0005623//cell;GO:0016021//integral component of membrane;GO:0044291//cell-cell contact zone;GO:0016020//membrane;GO:0031224//intrinsic component of membrane;GO:0005622//intracellular;GO:0043226//organelle;GO:0005886//plasma membrane;GO:0044444//cytoplasmic part;GO:0044424//intracellular part;GO:0030016//myof…	GO:0008092//cytoskeletal protein binding;GO:0098772//molecular function regulator;GO:0005515//protein binding;GO:0005488//binding;GO:0016247//channel regulator activity;GO:0019900//kinase binding;GO:0019899//enzyme binding	GO:0031647//regulation of protein stability;GO:0044802//single-organism membrane organization;GO:0051050//positive regulation of transport;GO:0048522//positive regulation of cellular process;GO:0044700//single organism signaling;GO:0044707//single-multicellular organism process;GO:0007154//cell communication;GO:0007275//multicellular organism development;GO:0050896//response to stimulus;GO:000320…
TCONS_00020499	1081.89	207.257	9.69	1.06	-3.19243	2.44953e-05	0.00112983	yes	ARAP2	XP_013820031.2 PREDICTED: arf-GAP with Rho-GAP domain, ANK repeat and PH domain-containing protein 2 isoform X3 [Capra hircus]	Cellular Processes	Transport and catabolism	ko04144//Endocytosis	K18440	GO:0005623//cell;GO:0044464//cell part	GO:0005543//phospholipid binding;GO:0008289//lipid binding;GO:0035091//phosphatidylinositol binding;GO:0005488//binding;GO:1901981//phosphatidylinositol phosphate binding;GO:0046872//metal ion binding;GO:0043169//cation binding;GO:0043167//ion binding;GO:0043168//anion binding;GO:0046914//transition metal ion binding	GO:0050790//regulation of catalytic activity;GO:0043087//regulation of GTPase activity;GO:0065007//biological regulation;GO:0050789//regulation of biological process;GO:0051336//regulation of hydrolase activity;GO:0065009//regulation of molecular function;GO:0019222//regulation of metabolic process
TCONS_00020604	332.193	31.27	2.85667	0.16	-4.15819	0.00131796	0.0279346	yes	ATP8A1	ELK03632.1 Putative phospholipid-transporting ATPase IA [Pteropus alecto]	-	-	-	-	-	-	-
TCONS_00020734	322.363	45.51	4.53333	0.38	-3.5765	0.000135694	0.00468197	yes	PPAT	XP_017904978.1 PREDICTED: amidophosphoribosyltransferase [Capra hircus]	Metabolism	Nucleotide metabolism;Amino acid metabolism;Global and Overview	ko01100//Metabolic pathways;ko00230//Purine metabolism;ko01110//Biosynthesis of secondary metabolites;ko01130//Biosynthesis of antibiotics;ko00250//Alanine, aspartate and glutamate metabolism	K00764	-	GO:0043169//cation binding;GO:0005488//binding;GO:0003824//catalytic activity;GO:0051540//metal cluster binding;GO:0016740//transferase activity;GO:0043167//ion binding	GO:0018130//heterocycle biosynthetic process;GO:0009156//ribonucleoside monophosphate biosynthetic process;GO:0019693//ribose phosphate metabolic process;GO:0009123//nucleoside monophosphate metabolic process;GO:0008152//metabolic process;GO:0009987//cellular process;GO:0009058//biosynthetic process;GO:1901360//organic cyclic compound metabolic process;GO:0055086//nucleobase-containing small mole…
TCONS_00021015	639.573	78.49	11.48	0.81	-3.82506	2.34204e-06	0.00015285	yes	SEC31A	XP_017905144.1 PREDICTED: protein transport protein Sec31A isoform X2 [Capra hircus]	Genetic Information Processing	Folding, sorting and degradation	ko04141//Protein processing in endoplasmic reticulum	K14005	GO:0031988//membrane-bounded vesicle;GO:0043234//protein complex;GO:0031982//vesicle;GO:0044425//membrane part;GO:0005623//cell;GO:0005622//intracellular;GO:0044444//cytoplasmic part;GO:0044432//endoplasmic reticulum part;GO:0005737//cytoplasm;GO:0044446//intracellular organelle part;GO:0043229//intracellular organelle;GO:0044422//organelle part;GO:0005783//endoplasmic reticulum;GO:0016023//cytop…	GO:0005488//binding;GO:0005515//protein binding	GO:0010035//response to inorganic substance;GO:0050896//response to stimulus;GO:0042221//response to chemical;GO:0010038//response to metal ion
TCONS_00021164	28.3433	1158.39	0.416667	9.27	4.4756	0.000797062	0.018901	yes	PROM1	XP_017905242.1 PREDICTED: prominin-1 isoform X5 [Capra hircus]	-	-	-	-	GO:0005902//microvillus;GO:0071944//cell periphery;GO:0031982//vesicle;GO:0031090//organelle membrane;GO:0044464//cell part;GO:0042995//cell projection;GO:0031988//membrane-bounded vesicle;GO:0005886//plasma membrane;GO:0098588//bounding membrane of organelle;GO:0005623//cell;GO:0016021//integral component of membrane;GO:0044424//intracellular part;GO:0031224//intrinsic component of membrane;GO:0…	GO:0050839//cell adhesion molecule binding;GO:0005488//binding;GO:0008092//cytoskeletal protein binding;GO:0005515//protein binding	GO:0007275//multicellular organism development;GO:0061326//renal tubule development;GO:0035850//epithelial cell differentiation involved in kidney development;GO:0072311//glomerular epithelial cell differentiation;GO:0048513//animal organ development;GO:0032501//multicellular organismal process;GO:0001655//urogenital system development;GO:0032502//developmental process;GO:0072010//glomerular epit…
TCONS_00021243	476.593	31.84	14.01	0.66	-4.40785	0.000125178	0.00439254	yes	TACC3	XP_017905295.1 PREDICTED: transforming acidic coiled-coil-containing protein 3 [Capra hircus]	Genetic Information Processing	Translation	ko03013//RNA transport	K14283	GO:0043226//organelle;GO:0044446//intracellular organelle part;GO:0015630//microtubule cytoskeleton;GO:0043229//intracellular organelle;GO:0005622//intracellular;GO:0044424//intracellular part;GO:0044422//organelle part;GO:0005815//microtubule organizing center;GO:0005623//cell;GO:0043232//intracellular non-membrane-bounded organelle;GO:0043228//non-membrane-bounded organelle;GO:0005856//cytoskel…	GO:0005488//binding;GO:0005515//protein binding	GO:1903827//regulation of cellular protein localization;GO:0032879//regulation of localization;GO:0048856//anatomical structure development;GO:0016043//cellular component organization;GO:0007017//microtubule-based process;GO:0046822//regulation of nucleocytoplasmic transport;GO:0009987//cellular process;GO:0051179//localization;GO:1903828//negative regulation of cellular protein localization;GO:0…
TCONS_00021415	1113.53	239.203	13.5333	1.8	-2.91045	4.526e-05	0.00190049	yes	ERAP1	XP_005683508.2 PREDICTED: endoplasmic reticulum aminopeptidase 1 [Capra hircus]	-	-	-	-	GO:0005576//extracellular region;GO:0005622//intracellular;GO:0005623//cell;GO:0031982//vesicle;GO:0043226//organelle;GO:0043227//membrane-bounded organelle;GO:0031988//membrane-bounded vesicle;GO:0044424//intracellular part;GO:0044421//extracellular region part;GO:0044464//cell part	GO:0008233//peptidase activity;GO:0046914//transition metal ion binding;GO:0043167//ion binding;GO:0005102//receptor binding;GO:0005126//cytokine receptor binding;GO:0070011//peptidase activity, acting on L-amino acid peptides;GO:0046872//metal ion binding;GO:0003824//catalytic activity;GO:0005515//protein binding;GO:0005488//binding;GO:0016787//hydrolase activity;GO:0043169//cation binding;GO:00…	GO:0008152//metabolic process;GO:0051704//multi-organism process;GO:0043207//response to external biotic stimulus;GO:0044238//primary metabolic process;GO:0019538//protein metabolic process;GO:0006508//proteolysis;GO:0043170//macromolecule metabolic process;GO:0065007//biological regulation;GO:0009607//response to biotic stimulus;GO:0022603//regulation of anatomical structure morphogenesis;GO:000…
TCONS_00021463	595.453	20.3467	10.5633	0.21	-5.65253	9.15995e-09	1.25064e-06	yes	MCTP1	XP_012034352.1 PREDICTED: multiple C2 and transmembrane domain-containing protein 1 isoform X7 [Ovis aries]	-	-	-	-	GO:0016020//membrane;GO:0031224//intrinsic component of membrane;GO:0044425//membrane part	-	-
TCONS_00021570	523.177	9.87	4.39333	0.0566667	-6.27667	3.4646e-06	0.000208673	yes	ATP10B	XP_017905573.1 PREDICTED: probable phospholipid-transporting ATPase VB isoform X1 [Capra hircus]	-	-	-	-	GO:0043229//intracellular organelle;GO:0043231//intracellular membrane-bounded organelle;GO:0016020//membrane;GO:0044425//membrane part;GO:0005623//cell;GO:0043226//organelle;GO:0031224//intrinsic component of membrane;GO:0044424//intracellular part;GO:0005622//intracellular;GO:0043227//membrane-bounded organelle;GO:0044464//cell part	GO:0001883//purine nucleoside binding;GO:0032549//ribonucleoside binding;GO:0043167//ion binding;GO:0022892//substrate-specific transporter activity;GO:0001882//nucleoside binding;GO:0003824//catalytic activity;GO:0005548//phospholipid transporter activity;GO:1901363//heterocyclic compound binding;GO:0097367//carbohydrate derivative binding;GO:0097159//organic cyclic compound binding;GO:0046872//…	GO:0015914//phospholipid transport;GO:0010876//lipid localization;GO:0006869//lipid transport;GO:0006820//anion transport;GO:0051179//localization;GO:0071702//organic substance transport;GO:0044765//single-organism transport;GO:0044699//single-organism process;GO:0015748//organophosphate ester transport;GO:0006810//transport;GO:0051234//establishment of localization;GO:1902578//single-organism lo…
TCONS_00021588	1732.82	83.39	14.5833	0.45	-5.01825	1.06177e-08	1.39409e-06	yes	Ccnjl	XP_017905578.1 PREDICTED: cyclin-J-like protein [Capra hircus]	-	-	-	-	-	-	-
TCONS_00021612	337.993	64.81	11.5267	1.26667	-3.18587	0.0013638	0.0286571	yes	RNF145	XP_017905584.1 PREDICTED: RING finger protein 145 [Capra hircus]	-	-	-	-	-	GO:0043167//ion binding;GO:0005488//binding;GO:0043169//cation binding	-
TCONS_00021643	125.737	0	7.07	0.001	-12.7875	5.82529e-05	0.00236416	yes	Havcr1	XP_017907129.1 PREDICTED: hepatitis A virus cellular receptor 1 homolog [Capra hircus]	-	-	-	-	-	-	-
TCONS_00021645	745.297	6.81	19.3767	0.0866667	-7.80463	6.46181e-06	0.000362923	yes	HAVCR1	XP_012026069.1 PREDICTED: hepatitis A virus cellular receptor 1 isoform X3 [Ovis aries musimon]	-	-	-	-	-	-	-
TCONS_00021647	113.603	0	2.85667	0.001	-11.4801	8.62646e-06	0.000464285	yes	Havcr1	XP_017907129.1 PREDICTED: hepatitis A virus cellular receptor 1 homolog [Capra hircus]	-	-	-	-	-	-	-
TCONS_00021903	101.86	0	2.22667	0.001	-11.1207	7.94699e-06	0.000431893	yes	Slc23a1	XP_012006068.1 PREDICTED: solute carrier family 23 member 1 isoform X5 [Ovis aries musimon]	-	-	-	-	GO:0044464//cell part;GO:0005623//cell;GO:0005886//plasma membrane;GO:0016020//membrane;GO:0043226//organelle;GO:0044424//intracellular part;GO:0031982//vesicle;GO:0043227//membrane-bounded organelle;GO:0031988//membrane-bounded vesicle;GO:0005622//intracellular;GO:0071944//cell periphery	GO:0015075//ion transmembrane transporter activity;GO:0015145//monosaccharide transmembrane transporter activity;GO:0022890//inorganic cation transmembrane transporter activity;GO:0015293//symporter activity;GO:0022891//substrate-specific transmembrane transporter activity;GO:0015291//secondary active transmembrane transporter activity;GO:0005343//organic acid:sodium symporter activity;GO:0015077…	GO:0030001//metal ion transport;GO:1902578//single-organism localization;GO:0044767//single-organism developmental process;GO:0044763//single-organism cellular process;GO:0048856//anatomical structure development;GO:0006812//cation transport;GO:0044707//single-multicellular organism process;GO:0048513//animal organ development;GO:0007399//nervous system development;GO:0044699//single-organism pro…
TCONS_00022257	373.877	105.747	3.15333	0.503333	-2.64729	0.00276023	0.049086	yes	FAM193B	XP_017906074.1 PREDICTED: protein FAM193B isoform X1 [Capra hircus]	-	-	-	-	GO:0044424//intracellular part;GO:0005622//intracellular;GO:0043226//organelle;GO:0043231//intracellular membrane-bounded organelle;GO:0044464//cell part;GO:0043229//intracellular organelle;GO:0043227//membrane-bounded organelle;GO:0005623//cell	-	-
TCONS_00022398	793.653	247.443	12.8767	2.3	-2.48505	0.000580904	0.0147412	yes	CSNK1G3	XP_012033605.1 PREDICTED: casein kinase I isoform gamma-3 isoform X8 [Ovis aries]	Environmental Information Processing	Signal transduction	ko04340//Hedgehog signaling pathway	K08958	-	-	-
TCONS_00022406	317.26	36.2533	4.67	0.306667	-3.92868	0.00023161	0.00713678	yes	Csnk1g3	XP_012033605.1 PREDICTED: casein kinase I isoform gamma-3 isoform X8 [Ovis aries]	Environmental Information Processing	Signal transduction	ko04340//Hedgehog signaling pathway	K08958	-	-	-
TCONS_00022427	433.26	28.65	14.0767	0.583333	-4.59284	0.000179067	0.00580079	yes	LMNB1	XP_003123930.2 PREDICTED: lamin-B1 [Sus scrofa]	-	-	-	-	GO:0031981//nuclear lumen;GO:0019866//organelle inner membrane;GO:0005882//intermediate filament;GO:0005622//intracellular;GO:0099512//supramolecular fiber;GO:0044446//intracellular organelle part;GO:0031975//envelope;GO:0043228//non-membrane-bounded organelle;GO:0043231//intracellular membrane-bounded organelle;GO:0012505//endomembrane system;GO:0005856//cytoskeleton;GO:0044428//nuclear part;GO:…	GO:0005515//protein binding;GO:0005488//binding;GO:0019899//enzyme binding	-
TCONS_00022633	369.32	15.1967	8.47667	0.206667	-5.35812	0.00139714	0.0291137	yes	TNFAIP8L1	XP_011994956.1 PREDICTED: tumor necrosis factor alpha-induced protein 8-like protein 1 isoform X1 [Ovis aries musimon]	-	-	-	-	-	-	GO:0048583//regulation of response to stimulus;GO:0009966//regulation of signal transduction;GO:0023051//regulation of signaling;GO:0065007//biological regulation;GO:0050794//regulation of cellular process;GO:0010646//regulation of cell communication;GO:0032006//regulation of TOR signaling;GO:0050789//regulation of biological process;GO:1902531//regulation of intracellular signal transduction
TCONS_00022720	222.727	0	2.1	0.001	-11.0362	5.2681e-09	7.71326e-07	yes	PRR36	XP_017906463.1 PREDICTED: proline-rich protein 36 isoform X1 [Capra hircus]	-	-	-	-	-	-	-
TCONS_00022732	48.7567	0	1.22333	0.001	-10.2566	0.000868019	0.0202386	yes	FCER2	XP_011991630.1 PREDICTED: low affinity immunoglobulin epsilon Fc receptor isoform X4 [Ovis aries musimon]	Organismal Systems	Immune system	ko04640//Hematopoietic cell lineage	K06468	GO:0044464//cell part;GO:0016020//membrane;GO:0044425//membrane part;GO:0044459//plasma membrane part;GO:0043227//membrane-bounded organelle;GO:0071944//cell periphery;GO:0031982//vesicle;GO:0005886//plasma membrane;GO:0043226//organelle;GO:0031988//membrane-bounded vesicle;GO:0005623//cell	-	GO:0043085//positive regulation of catalytic activity;GO:0010604//positive regulation of macromolecule metabolic process;GO:0019222//regulation of metabolic process;GO:0010556//regulation of macromolecule biosynthetic process;GO:0051341//regulation of oxidoreductase activity;GO:0060255//regulation of macromolecule metabolic process;GO:0065009//regulation of molecular function;GO:0065007//biologic…
TCONS_00022736	85.3133	0	1.61333	0.001	-10.6558	1.82176e-05	0.000885223	yes	Tnfsf14	XP_017907161.1 PREDICTED: tumor necrosis factor ligand superfamily member 14-like [Capra hircus]	Environmental Information Processing	Signal transduction;Signaling molecules and interaction	ko04060//Cytokine-cytokine receptor interaction;ko04064//NF-kappa B signaling pathway	K05477	GO:0031224//intrinsic component of membrane;GO:0016020//membrane;GO:0044425//membrane part;GO:0044421//extracellular region part;GO:0005576//extracellular region	GO:0061135//endopeptidase regulator activity;GO:0004869//cysteine-type endopeptidase inhibitor activity;GO:0004866//endopeptidase inhibitor activity;GO:0098772//molecular function regulator;GO:0061134//peptidase regulator activity;GO:0032813//tumor necrosis factor receptor superfamily binding;GO:0005126//cytokine receptor binding;GO:0005515//protein binding;GO:0030234//enzyme regulator activity;G…	GO:1904591//positive regulation of protein import;GO:0042981//regulation of apoptotic process;GO:1902533//positive regulation of intracellular signal transduction;GO:0051049//regulation of transport;GO:0050793//regulation of developmental process;GO:0009967//positive regulation of signal transduction;GO:0043069//negative regulation of programmed cell death;GO:0050795//regulation of behavior;GO:00…
TCONS_00022865	1805.82	37.04	14.2433	0.196667	-6.17839	6.49761e-09	9.35951e-07	yes	ARHGEF18	XP_011991568.2 PREDICTED: rho guanine nucleotide exchange factor 18 isoform X2 [Ovis aries musimon]	-	-	-	-	-	GO:0005488//binding;GO:0043169//cation binding;GO:0043167//ion binding	GO:0065009//regulation of molecular function;GO:0019222//regulation of metabolic process;GO:0050789//regulation of biological process;GO:0051336//regulation of hydrolase activity;GO:0043087//regulation of GTPase activity;GO:0050790//regulation of catalytic activity;GO:0065007//biological regulation
TCONS_00023141	164.993	1.07	3.06	0.0133333	-7.84235	1.93848e-05	0.000927761	yes	ANKLE1	XP_617670.4 PREDICTED: ankyrin repeat and LEM domain-containing protein 1 isoform X2 [Bos taurus]	-	-	-	-	-	-	-
TCONS_00023440	435.91	22.2	31.3233	1.02	-4.9406	5.89639e-05	0.00238589	yes	CAMK4	XP_002691060.1 PREDICTED: calcium/calmodulin-dependent protein kinase type IV isoform X2 [Bos taurus]	Organismal Systems;Environmental Information Processing	Signal transduction;Nervous system;Aging;Development;Endocrine system	ko04024//cAMP signaling pathway;ko04020//Calcium signaling pathway;ko04921//Oxytocin signaling pathway;ko04722//Neurotrophin signaling pathway;ko04380//Osteoclast differentiation;ko04725//Cholinergic synapse;ko04211//Longevity regulating pathway - mammal;ko04925//Aldosterone synthesis and secretion;ko04720//Long-term potentiation	K05869	-	-	-
TCONS_00023506	157.433	0.516667	2.64667	0.00333333	-9.633	1.42582e-06	0.000100736	yes	PAM	XP_017905490.1 PREDICTED: peptidyl-glycine alpha-amidating monooxygenase isoform X3 [Capra hircus]	-	-	-	-	GO:0012506//vesicle membrane;GO:0016023//cytoplasmic, membrane-bounded vesicle;GO:0030659//cytoplasmic vesicle membrane;GO:0031988//membrane-bounded vesicle;GO:0016020//membrane;GO:0005623//cell;GO:0031090//organelle membrane;GO:0044444//cytoplasmic part;GO:0043227//membrane-bounded organelle;GO:0043231//intracellular membrane-bounded organelle;GO:0043229//intracellular organelle;GO:0031410//cyto…	GO:0046872//metal ion binding;GO:0016705//oxidoreductase activity, acting on paired donors, with incorporation or reduction of molecular oxygen;GO:0016491//oxidoreductase activity;GO:0003824//catalytic activity;GO:0016842//amidine-lyase activity;GO:0043167//ion binding;GO:0019842//vitamin binding;GO:0036094//small molecule binding;GO:0016840//carbon-nitrogen lyase activity;GO:0043169//cation bind…	GO:0043603//cellular amide metabolic process;GO:0006807//nitrogen compound metabolic process;GO:0044237//cellular metabolic process;GO:0044699//single-organism process;GO:0034641//cellular nitrogen compound metabolic process;GO:0044710//single-organism metabolic process;GO:0009987//cellular process;GO:0008152//metabolic process
TCONS_00024037	99.02	1.17	1.32333	0.01	-7.04803	0.000136518	0.00470313	yes	PCDHB1	XP_005683112.1 PREDICTED: protocadherin beta-1 [Capra hircus]	-	-	-	-	GO:0031224//intrinsic component of membrane;GO:0044425//membrane part;GO:0016020//membrane	-	GO:0007155//cell adhesion;GO:0098609//cell-cell adhesion;GO:0098742//cell-cell adhesion via plasma-membrane adhesion molecules;GO:0022610//biological adhesion
TCONS_00024269	5016.75	21.45	102.47	0.323333	-8.30796	3.80291e-06	0.00022751	yes	TCF7	XP_011971424.1 PREDICTED: transcription factor 7 isoform X12 [Ovis aries musimon]	Organismal Systems;Cellular Processes;Environmental Information Processing	Signal transduction;Cellular commiunity;Endocrine system	ko04390//Hippo signaling pathway;ko04310//Wnt signaling pathway;ko04916//Melanogenesis;ko04520//Adherens junction	K02620	-	-	-
TCONS_00024363	94.28	0	0.98	0.001	-9.93664	1.26461e-05	0.000652991	yes	ABCA7	XP_017905963.1 PREDICTED: ATP-binding cassette sub-family A member 7 isoform X4 [Capra hircus]	Environmental Information Processing	Membrane transport	ko02010//ABC transporters	K05645	-	-	-
TCONS_00024383	143.24	0	15.9433	0.001	-13.9607	1.2109e-05	0.000627441	yes	AZU1	XP_004009519.1 PREDICTED: azurocidin [Ovis aries]	-	-	-	-	-	-	-
TCONS_00024658	82.14	0	1.06	0.001	-10.0498	2.57689e-05	0.00118245	yes	ACSL6	XP_017906214.1 PREDICTED: long-chain-fatty-acid--CoA ligase 6 isoform X2 [Capra hircus]	Organismal Systems;Metabolism;Cellular Processes	Global and Overview;Lipid metabolism;Endocrine system;Transport and catabolism	ko01100//Metabolic pathways;ko03320//PPAR signaling pathway;ko04146//Peroxisome;ko04920//Adipocytokine signaling pathway;ko01212//Fatty acid metabolism;ko00071//Fatty acid degradation;ko00061//Fatty acid biosynthesis	K01897	GO:0005623//cell;GO:0043227//membrane-bounded organelle;GO:0044424//intracellular part;GO:0043226//organelle;GO:0043231//intracellular membrane-bounded organelle;GO:0043229//intracellular organelle;GO:0044464//cell part;GO:0005622//intracellular	GO:0005488//binding;GO:0005515//protein binding;GO:0016877//ligase activity, forming carbon-sulfur bonds;GO:0015645//fatty acid ligase activity;GO:0046983//protein dimerization activity;GO:0016874//ligase activity;GO:0003824//catalytic activity	GO:0061351//neural precursor cell proliferation;GO:0008283//cell proliferation;GO:0044699//single-organism process
TCONS_00024786	284.177	30.8867	4.99667	0.32	-3.96482	5.08453e-05	0.00210132	yes	CACTIN	XP_017906321.1 PREDICTED: cactin [Capra hircus]	-	-	-	-	GO:0043227//membrane-bounded organelle;GO:0043226//organelle;GO:0044424//intracellular part;GO:0005623//cell;GO:0005622//intracellular;GO:0044464//cell part	-	GO:0048583//regulation of response to stimulus;GO:0071310//cellular response to organic substance;GO:0009987//cellular process;GO:0009966//regulation of signal transduction;GO:0065007//biological regulation;GO:0070887//cellular response to chemical stimulus;GO:0050794//regulation of cellular process;GO:0051241//negative regulation of multicellular organismal process;GO:0034097//response to cytoki…
TCONS_00024994	586.413	78.9833	9.23	0.75	-3.62137	3.65509e-05	0.0015903	yes	ZNF557	XP_014334088.1 PREDICTED: zinc finger protein 333-like [Bos mutus]	-	-	-	-	-	-	-
TCONS_00025171	70.8967	0	1.00667	0.001	-9.97537	0.0028231	0.049824	yes	NACC1	XP_017906729.1 PREDICTED: nucleus accumbens-associated protein 1 [Capra hircus]	-	-	-	-	GO:0043231//intracellular membrane-bounded organelle;GO:0043233//organelle lumen;GO:0005623//cell;GO:0044446//intracellular organelle part;GO:0005634//nucleus;GO:0044451//nucleoplasm part;GO:0044424//intracellular part;GO:0031974//membrane-enclosed lumen;GO:0005622//intracellular;GO:0043226//organelle;GO:0043229//intracellular organelle;GO:0005654//nucleoplasm;GO:0044422//organelle part;GO:004442…	-	GO:0050794//regulation of cellular process;GO:0016043//cellular component organization;GO:0071822//protein complex subunit organization;GO:0019222//regulation of metabolic process;GO:1903506//regulation of nucleic acid-templated transcription;GO:0065003//macromolecular complex assembly;GO:0010468//regulation of gene expression;GO:0031326//regulation of cellular biosynthetic process;GO:0071840//ce…
TCONS_00025177	0	174.933	0.001	1.39333	10.4443	0.00113885	0.0249828	yes	NFIX	XP_008577535.1 PREDICTED: nuclear factor 1 X-type isoform X4 [Galeopterus variegatus]	-	-	-	-	-	-	-
TCONS_00025217	0	317.847	0.001	0.623333	9.28386	4.54672e-07	3.68067e-05	yes	MUC16	XP_017906772.1 PREDICTED: mucin-16 isoform X1 [Capra hircus]	-	-	-	-	-	-	-
TCONS_00025399	663.833	68.2667	12.4433	0.82	-3.92361	1.87128e-06	0.000126193	yes	JAK3	XP_017906892.1 PREDICTED: tyrosine-protein kinase JAK3 [Capra hircus]	Organismal Systems;Cellular Processes;Environmental Information Processing	Signal transduction;Cellular commiunity;Immune system	ko04151//PI3K-Akt signaling pathway;ko04062//Chemokine signaling pathway;ko04630//Jak-STAT signaling pathway;ko04550//Signaling pathways regulating pluripotency of stem cells	K11218	-	-	-
TCONS_00025451	765.337	156.163	8.73667	1.06333	-3.03849	0.000311209	0.00900644	yes	SUGP2	XP_017906957.1 PREDICTED: SURP and G-patch domain-containing protein 2 isoform X2 [Capra hircus]	-	-	-	-	-	GO:0003723//RNA binding;GO:0005488//binding;GO:0097159//organic cyclic compound binding;GO:0003676//nucleic acid binding;GO:1901363//heterocyclic compound binding	GO:0010467//gene expression;GO:0008152//metabolic process;GO:0071704//organic substance metabolic process;GO:0043170//macromolecule metabolic process
TCONS_00025484	252.673	3.10667	3.72	0.0333333	-6.80219	4.41079e-05	0.00186443	yes	LPAR2	XP_014951047.1 PREDICTED: lysophosphatidic acid receptor 2 isoform X1 [Ovis aries]	Environmental Information Processing	Signaling molecules and interaction;Signal transduction	ko04151//PI3K-Akt signaling pathway;ko04080//Neuroactive ligand-receptor interaction;ko04015//Rap1 signaling pathway;ko04072//Phospholipase D signaling pathway	K04291	GO:0031988//membrane-bounded vesicle;GO:0044425//membrane part;GO:0005737//cytoplasm;GO:0016023//cytoplasmic, membrane-bounded vesicle;GO:0031410//cytoplasmic vesicle;GO:0031224//intrinsic component of membrane;GO:0044444//cytoplasmic part;GO:0005623//cell;GO:0005622//intracellular;GO:0044464//cell part;GO:0016020//membrane;GO:0043229//intracellular organelle;GO:0044424//intracellular part;GO:003…	GO:0038023//signaling receptor activity;GO:0004930//G-protein coupled receptor activity;GO:0004888//transmembrane signaling receptor activity;GO:0005488//binding;GO:0099600//transmembrane receptor activity;GO:0045125//bioactive lipid receptor activity;GO:0019904//protein domain specific binding;GO:0060089//molecular transducer activity;GO:0004871//signal transducer activity;GO:0005515//protein bi…	GO:0007166//cell surface receptor signaling pathway;GO:0019222//regulation of metabolic process;GO:0010562//positive regulation of phosphorus metabolic process;GO:0007154//cell communication;GO:0050896//response to stimulus;GO:0042325//regulation of phosphorylation;GO:0010646//regulation of cell communication;GO:0065007//biological regulation;GO:0031325//positive regulation of cellular metabolic …
TCONS_00025821	619.767	135.857	5.97667	0.746667	-3.0008	0.000119924	0.00425665	yes	HAUS6	XP_013821349.2 PREDICTED: HAUS augmin-like complex subunit 6 [Capra hircus]	-	-	-	-	GO:0005856//cytoskeleton;GO:0044430//cytoskeletal part;GO:0043229//intracellular organelle;GO:0005875//microtubule associated complex;GO:0005622//intracellular;GO:0015630//microtubule cytoskeleton;GO:0044446//intracellular organelle part;GO:0043226//organelle;GO:0043234//protein complex;GO:0043232//intracellular non-membrane-bounded organelle;GO:0044464//cell part;GO:0043228//non-membrane-bounded…	-	GO:0022607//cellular component assembly;GO:0007017//microtubule-based process;GO:0071840//cellular component organization or biogenesis;GO:0070271//protein complex biogenesis;GO:0044085//cellular component biogenesis;GO:0044699//single-organism process;GO:0006996//organelle organization;GO:0009987//cellular process;GO:0071822//protein complex subunit organization;GO:1902589//single-organism organ…
TCONS_00026144	234.833	24.7633	4.22333	0.27	-3.96735	0.00012229	0.00431653	yes	Tle4	XP_010806227.1 PREDICTED: transducin-like enhancer protein 4 isoform X2 [Bos taurus]	-	-	-	-	GO:0005622//intracellular;GO:0043227//membrane-bounded organelle;GO:0044424//intracellular part;GO:0005623//cell;GO:0043229//intracellular organelle;GO:0044464//cell part;GO:0043226//organelle;GO:0043231//intracellular membrane-bounded organelle	GO:0000989//transcription factor activity, transcription factor binding;GO:0005488//binding;GO:0008134//transcription factor binding;GO:0000981//RNA polymerase II transcription factor activity, sequence-specific DNA binding;GO:0003700//transcription factor activity, sequence-specific DNA binding;GO:0000988//transcription factor activity, protein binding;GO:0003712//transcription cofactor activity…	GO:2001141//regulation of RNA biosynthetic process;GO:0023052//signaling;GO:0051716//cellular response to stimulus;GO:0031326//regulation of cellular biosynthetic process;GO:0006355//regulation of transcription, DNA-templated;GO:0007165//signal transduction;GO:0007166//cell surface receptor signaling pathway;GO:0019222//regulation of metabolic process;GO:0019219//regulation of nucleobase-containi…
TCONS_00026309	71.79	1210.31	0.826667	9.41	3.50882	0.00210371	0.0399384	yes	NR4A3	XP_017907727.1 PREDICTED: nuclear receptor subfamily 4 group A member 3 isoform X1 [Capra hircus]	-	-	-	-	GO:0005623//cell;GO:0044424//intracellular part;GO:0043226//organelle;GO:0032991//macromolecular complex;GO:0043229//intracellular organelle;GO:0043234//protein complex;GO:0043227//membrane-bounded organelle;GO:0005622//intracellular;GO:0043231//intracellular membrane-bounded organelle;GO:0044464//cell part	GO:0005488//binding;GO:1901363//heterocyclic compound binding;GO:0003677//DNA binding;GO:0043167//ion binding;GO:0004871//signal transducer activity;GO:0043169//cation binding;GO:0003676//nucleic acid binding;GO:0046914//transition metal ion binding;GO:0097159//organic cyclic compound binding;GO:0004872//receptor activity;GO:0001071//nucleic acid binding transcription factor activity;GO:0000982//…	GO:0065007//biological regulation;GO:0043068//positive regulation of programmed cell death;GO:0048856//anatomical structure development;GO:0070887//cellular response to chemical stimulus;GO:0030030//cell projection organization;GO:0001704//formation of primary germ layer;GO:0048598//embryonic morphogenesis;GO:0060548//negative regulation of cell death;GO:0007417//central nervous system developmen…
TCONS_00026471	879.883	261.913	67.5367	11.1133	-2.60338	0.00051842	0.0133923	yes	DNAJA1	XP_014315873.1 PREDICTED: LOW QUALITY PROTEIN: dnaJ homolog subfamily A member 1-like [Myotis lucifugus]	Genetic Information Processing	Folding, sorting and degradation	ko04141//Protein processing in endoplasmic reticulum	K09502	-	-	-
TCONS_00026624	336.273	0	5.93667	0.001	-12.5354	1.43684e-08	1.82725e-06	yes	FGD3	XP_011988905.1 PREDICTED: FYVE, RhoGEF and PH domain-containing protein 3 isoform X3 [Ovis aries musimon]	Cellular Processes	Cell motility	ko04810//Regulation of actin cytoskeleton	K05722	-	GO:0043169//cation binding;GO:0043167//ion binding;GO:0005488//binding	GO:0050790//regulation of catalytic activity;GO:0043087//regulation of GTPase activity;GO:0051336//regulation of hydrolase activity;GO:0050789//regulation of biological process;GO:0065009//regulation of molecular function;GO:0065007//biological regulation;GO:0019222//regulation of metabolic process
TCONS_00026628	144.707	6.43667	9.47	0.25	-5.24336	0.000526812	0.0135715	yes	SUSD3	DAA26572.1 TPA: sushi domain containing 3-like [Bos taurus]	-	-	-	-	-	-	-
TCONS_00026634	198.063	1907.73	2.32	12.41	2.41931	0.00194062	0.0376042	yes	WNK2	XP_017907990.1 PREDICTED: LOW QUALITY PROTEIN: serine/threonine-protein kinase WNK2 [Capra hircus]	-	-	-	-	GO:0044424//intracellular part;GO:0005623//cell;GO:0005622//intracellular;GO:0044464//cell part	GO:0032549//ribonucleoside binding;GO:0016301//kinase activity;GO:0097367//carbohydrate derivative binding;GO:0001882//nucleoside binding;GO:0001883//purine nucleoside binding;GO:0032550//purine ribonucleoside binding;GO:0016740//transferase activity;GO:0003824//catalytic activity;GO:0097159//organic cyclic compound binding;GO:1901363//heterocyclic compound binding;GO:0005488//binding;GO:0036094/…	GO:0023051//regulation of signaling;GO:0010648//negative regulation of cell communication;GO:0065008//regulation of biological quality;GO:0051246//regulation of protein metabolic process;GO:0044699//single-organism process;GO:0032268//regulation of cellular protein metabolic process;GO:0048585//negative regulation of response to stimulus;GO:0009968//negative regulation of signal transduction;GO:0…
TCONS_00026882	85.5133	0	0.89	0.001	-9.79766	3.63841e-05	0.0015846	yes	Col27a1	XP_017908151.1 PREDICTED: collagen alpha-1(XXVII) chain isoform X2 [Capra hircus]	Organismal Systems	Digestive system	ko04974//Protein digestion and absorption	K19721	GO:0032991//macromolecular complex;GO:0043234//protein complex;GO:0005581//collagen trimer	GO:0005198//structural molecule activity	GO:0009987//cellular process;GO:0071840//cellular component organization or biogenesis;GO:0043062//extracellular structure organization;GO:0044763//single-organism cellular process;GO:0044699//single-organism process;GO:0016043//cellular component organization
TCONS_00027194	85.2567	1171.9	1.75667	13.8133	2.97515	8.22106e-05	0.00312752	yes	FOCAD	XP_017907398.1 PREDICTED: focadhesin isoform X1 [Capra hircus]	-	-	-	-	-	-	-
TCONS_00027223	64.4	0	0.78	0.001	-9.60733	0.000114961	0.00412654	yes	CCDC171	XP_005683707.1 PREDICTED: coiled-coil domain-containing protein 171 [Capra hircus]	-	-	-	-	-	-	-
TCONS_00027254	55.4867	0	1.70333	0.001	-10.7341	0.000232424	0.00715435	yes	IL33	XP_005683738.1 PREDICTED: interleukin-33 isoform X1 [Capra hircus]	Organismal Systems	Immune system	ko04623//Cytosolic DNA-sensing pathway	K12967	-	-	-
TCONS_00027375	154.94	0	1.62	0.001	-10.6618	0.00170023	0.0340353	yes	TMEM2	XP_005683802.1 PREDICTED: transmembrane protein 2 [Capra hircus]	-	-	-	-	-	-	-
TCONS_00027563	271.623	10.3367	2.35333	0.0533333	-5.46352	1.32221e-05	0.000678602	yes	PAX5	XP_012003150.1 PREDICTED: paired box protein Pax-5 isoform X4 [Ovis aries musimon]	-	-	-	-	GO:0043229//intracellular organelle;GO:0043227//membrane-bounded organelle;GO:0043234//protein complex;GO:0044464//cell part;GO:0043231//intracellular membrane-bounded organelle;GO:0005622//intracellular;GO:0032991//macromolecular complex;GO:0044424//intracellular part;GO:0043226//organelle;GO:0005623//cell	GO:0000981//RNA polymerase II transcription factor activity, sequence-specific DNA binding;GO:0097159//organic cyclic compound binding;GO:0044212//transcription regulatory region DNA binding;GO:0001067//regulatory region nucleic acid binding;GO:1901363//heterocyclic compound binding;GO:0000982//transcription factor activity, RNA polymerase II core promoter proximal region sequence-specific bindin…	GO:0050794//regulation of cellular process;GO:0060538//skeletal muscle organ development;GO:2001141//regulation of RNA biosynthetic process;GO:0007517//muscle organ development;GO:0048731//system development;GO:0080090//regulation of primary metabolic process;GO:0009889//regulation of biosynthetic process;GO:0006355//regulation of transcription, DNA-templated;GO:0031399//regulation of protein mod…
TCONS_00027674	124.463	10.5067	1.68667	0.09	-4.22811	0.00166659	0.0335353	yes	HR	XP_017907761.1 PREDICTED: lysine-specific demethylase hairless isoform X2 [Capra hircus]	-	-	-	-	GO:0043233//organelle lumen;GO:0044428//nuclear part;GO:0044451//nucleoplasm part;GO:0043231//intracellular membrane-bounded organelle;GO:0043229//intracellular organelle;GO:0044464//cell part;GO:0044446//intracellular organelle part;GO:0044424//intracellular part;GO:0005654//nucleoplasm;GO:0043227//membrane-bounded organelle;GO:0005623//cell;GO:0031981//nuclear lumen;GO:0031974//membrane-enclose…	-	GO:0019219//regulation of nucleobase-containing compound metabolic process;GO:0006355//regulation of transcription, DNA-templated;GO:0060255//regulation of macromolecule metabolic process;GO:2001141//regulation of RNA biosynthetic process;GO:0050789//regulation of biological process;GO:0031326//regulation of cellular biosynthetic process;GO:0009889//regulation of biosynthetic process;GO:1903506//…
TCONS_00027784	268.867	50.32	4.54667	0.52	-3.12823	0.00133427	0.0282264	yes	UBAP2	XP_013821594.2 PREDICTED: ubiquitin-associated protein 2 isoform X1 [Capra hircus]	-	-	-	-	-	-	-
TCONS_00027995	2177.49	162.63	31.53	1.51667	-4.37775	2.74845e-08	3.2278e-06	yes	SYK	ELR62626.1 Tyrosine-protein kinase SYK, partial [Bos mutus]	Organismal Systems;Environmental Information Processing	Development;Immune system;Signal transduction	ko04151//PI3K-Akt signaling pathway;ko04650//Natural killer cell mediated cytotoxicity;ko04072//Phospholipase D signaling pathway;ko04611//Platelet activation;ko04380//Osteoclast differentiation;ko04064//NF-kappa B signaling pathway;ko04666//Fc gamma R-mediated phagocytosis;ko04662//B cell receptor signaling pathway;ko04664//Fc epsilon RI signaling pathway	K05855	-	-	-
TCONS_00028063	87.6767	0	0.666667	0.001	-9.38082	1.8013e-05	0.000876239	yes	ABCA1	XP_005684320.2 PREDICTED: ATP-binding cassette sub-family A member 1 isoform X1 [Capra hircus]	Organismal Systems;Environmental Information Processing	Membrane transport;Digestive system	ko02010//ABC transporters;ko04975//Fat digestion and absorption	K05641	-	-	-
TCONS_00028191	0	90.29	0.001	0.68	9.40939	0.000396022	0.0109757	yes	WDR31	XP_017908115.1 PREDICTED: WD repeat-containing protein 31 isoform X2 [Capra hircus]	-	-	-	-	-	-	-
TCONS_00028244	1494.69	183.493	15.8033	1.27	-3.63733	1.87346e-06	0.000126193	yes	TNC	XP_017908171.1 PREDICTED: tenascin isoform X4 [Capra hircus]	Environmental Information Processing;Cellular Processes	Signal transduction;Signaling molecules and interaction;Cellular commiunity	ko04151//PI3K-Akt signaling pathway;ko04510//Focal adhesion;ko04512//ECM-receptor interaction	K06252	GO:0044421//extracellular region part;GO:0005912//adherens junction;GO:0030054//cell junction;GO:0005576//extracellular region;GO:0031012//extracellular matrix;GO:0005924//cell-substrate adherens junction;GO:0005578//proteinaceous extracellular matrix;GO:0070161//anchoring junction;GO:0030055//cell-substrate junction;GO:0044420//extracellular matrix component	GO:0005488//binding;GO:0005515//protein binding	GO:0001503//ossification;GO:0001763//morphogenesis of a branching structure;GO:0016043//cellular component organization;GO:0031102//neuron projection regeneration;GO:0048699//generation of neurons;GO:0048589//developmental growth;GO:0022008//neurogenesis;GO:0031175//neuron projection development;GO:0048732//gland development;GO:0044763//single-organism cellular process;GO:0042476//odontogenesis;G…
TCONS_00028387	311.16	0	3.61333	0.001	-11.8191	8.33404e-06	0.000450442	yes	MYO6	XP_017908373.1 PREDICTED: unconventional myosin-VI isoform X3 [Capra hircus]	-	-	-	-	GO:0044446//intracellular organelle part;GO:0005623//cell;GO:0044444//cytoplasmic part;GO:0015629//actin cytoskeleton;GO:0043228//non-membrane-bounded organelle;GO:0031252//cell leading edge;GO:0044464//cell part;GO:0043231//intracellular membrane-bounded organelle;GO:0043005//neuron projection;GO:0031974//membrane-enclosed lumen;GO:0044422//organelle part;GO:0044297//cell body;GO:0044424//intrac…	GO:0001883//purine nucleoside binding;GO:0003824//catalytic activity;GO:0032549//ribonucleoside binding;GO:0097367//carbohydrate derivative binding;GO:0036094//small molecule binding;GO:0017111//nucleoside-triphosphatase activity;GO:0016817//hydrolase activity, acting on acid anhydrides;GO:0001882//nucleoside binding;GO:1901363//heterocyclic compound binding;GO:0097159//organic cyclic compound bi…	GO:0035315//hair cell differentiation;GO:0046942//carboxylic acid transport;GO:0048513//animal organ development;GO:0010468//regulation of gene expression;GO:0048869//cellular developmental process;GO:0030182//neuron differentiation;GO:0044763//single-organism cellular process;GO:0019222//regulation of metabolic process;GO:0051602//response to electrical stimulus;GO:0065007//biological regulation…
TCONS_00028402	39.4033	0	0.583333	0.001	-9.18818	0.00161197	0.0327172	yes	TTK	XP_017908395.1 PREDICTED: dual specificity protein kinase TTK isoform X3 [Capra hircus]	Cellular Processes	Cell growth and death	ko04110//Cell cycle	K08866	-	GO:0036094//small molecule binding;GO:0003824//catalytic activity;GO:0097367//carbohydrate derivative binding;GO:0016740//transferase activity;GO:0032550//purine ribonucleoside binding;GO:0001882//nucleoside binding;GO:0005488//binding;GO:0016773//phosphotransferase activity, alcohol group as acceptor;GO:0016301//kinase activity;GO:0097159//organic cyclic compound binding;GO:0032549//ribonucleosi…	GO:0044699//single-organism process;GO:0006464//cellular protein modification process;GO:0019538//protein metabolic process;GO:0071704//organic substance metabolic process;GO:0044238//primary metabolic process;GO:0044267//cellular protein metabolic process;GO:0044763//single-organism cellular process;GO:0009987//cellular process;GO:0043170//macromolecule metabolic process;GO:0044237//cellular met…
TCONS_00028586	368.523	12.4367	6.96333	0.153333	-5.50503	2.00471e-07	1.76692e-05	yes	FYN	XP_012971238.1 PREDICTED: tyrosine-protein kinase Fyn isoform X1 [Mesocricetus auratus]	Organismal Systems;Environmental Information Processing;Cellular Processes	Development;Cellular commiunity;Immune system;Signal transduction;Nervous system	ko04510//Focal adhesion;ko04650//Natural killer cell mediated cytotoxicity;ko04072//Phospholipase D signaling pathway;ko04360//Axon guidance;ko04611//Platelet activation;ko04380//Osteoclast differentiation;ko04660//T cell receptor signaling pathway;ko04071//Sphingolipid signaling pathway;ko04725//Cholinergic synapse;ko04520//Adherens junction;ko04664//Fc epsilon RI signaling pathway	K05703	-	-	-
TCONS_00028717	242.943	7.43667	3.99667	0.07	-5.8353	8.67799e-07	6.59142e-05	yes	BVES	XP_004011290.1 PREDICTED: blood vessel epicardial substance isoform X1 [Ovis aries]	-	-	-	-	GO:0005886//plasma membrane;GO:0044464//cell part;GO:0005623//cell;GO:0031224//intrinsic component of membrane;GO:0044459//plasma membrane part;GO:0016020//membrane;GO:0043296//apical junction complex;GO:0030054//cell junction;GO:0044425//membrane part;GO:0071944//cell periphery;GO:0005911//cell-cell junction	GO:0030551//cyclic nucleotide binding;GO:1901265//nucleoside phosphate binding;GO:1901363//heterocyclic compound binding;GO:0097159//organic cyclic compound binding;GO:0005488//binding;GO:0036094//small molecule binding;GO:0000166//nucleotide binding	GO:0098602//single organism cell adhesion;GO:0042692//muscle cell differentiation;GO:0051234//establishment of localization;GO:0048738//cardiac muscle tissue development;GO:0048468//cell development;GO:0000904//cell morphogenesis involved in differentiation;GO:0035051//cardiocyte differentiation;GO:1903522//regulation of blood circulation;GO:0055001//muscle cell development;GO:0051239//regulation…
TCONS_00028759	364.02	102.89	3.23667	0.533333	-2.6014	0.00247541	0.0452859	yes	MMS22L	XP_017908628.1 PREDICTED: protein MMS22-like isoform X2 [Capra hircus]	-	-	-	-	GO:0005654//nucleoplasm;GO:0005657//replication fork;GO:0008023//transcription elongation factor complex;GO:0044428//nuclear part;GO:0005622//intracellular;GO:0043227//membrane-bounded organelle;GO:0044451//nucleoplasm part;GO:0044427//chromosomal part;GO:0043226//organelle;GO:0044446//intracellular organelle part;GO:0044464//cell part;GO:0070013//intracellular organelle lumen;GO:0043232//intrace…	-	GO:0071704//organic substance metabolic process;GO:0044763//single-organism cellular process;GO:0090304//nucleic acid metabolic process;GO:0006725//cellular aromatic compound metabolic process;GO:1901360//organic cyclic compound metabolic process;GO:0044237//cellular metabolic process;GO:0008152//metabolic process;GO:0043170//macromolecule metabolic process;GO:0044238//primary metabolic process;G…
TCONS_00028892	719.33	0	15.2067	0.001	-13.8924	5.63273e-17	7.59736e-14	yes	MYB	XP_017908724.1 PREDICTED: transcriptional activator Myb isoform X4 [Capra hircus]	Environmental Information Processing	Signal transduction	ko04151//PI3K-Akt signaling pathway	K09420	GO:0044464//cell part;GO:0043227//membrane-bounded organelle;GO:0043226//organelle;GO:0044424//intracellular part;GO:0043229//intracellular organelle;GO:0044444//cytoplasmic part;GO:0005737//cytoplasm;GO:0005622//intracellular;GO:0005623//cell;GO:0043231//intracellular membrane-bounded organelle	GO:0000981//RNA polymerase II transcription factor activity, sequence-specific DNA binding;GO:0005488//binding;GO:0097159//organic cyclic compound binding;GO:1901363//heterocyclic compound binding;GO:0003700//transcription factor activity, sequence-specific DNA binding;GO:0001071//nucleic acid binding transcription factor activity;GO:0003676//nucleic acid binding;GO:0000982//transcription factor …	GO:0031399//regulation of protein modification process;GO:0051252//regulation of RNA metabolic process;GO:0002521//leukocyte differentiation;GO:0048513//animal organ development;GO:1902275//regulation of chromatin organization;GO:0019219//regulation of nucleobase-containing compound metabolic process;GO:0048869//cellular developmental process;GO:0050789//regulation of biological process;GO:007083…
TCONS_00028925	230.913	0	22.7167	0.001	-14.4715	5.72468e-10	1.17966e-07	yes	ABRACL	XP_008689265.1 PREDICTED: costars family protein ABRACL [Ursus maritimus]	-	-	-	-	-	-	-
TCONS_00029279	51.29	0	1.12	0.001	-10.1293	0.000432827	0.0116758	yes	CCR6	XP_015328423.1 PREDICTED: C-C chemokine receptor type 6 isoform X1 [Bos taurus]	Organismal Systems;Environmental Information Processing	Signaling molecules and interaction;Immune system	ko04060//Cytokine-cytokine receptor interaction;ko04062//Chemokine signaling pathway	K04181	GO:0005623//cell;GO:0016020//membrane;GO:0044464//cell part;GO:0031224//intrinsic component of membrane;GO:0044425//membrane part	GO:0004888//transmembrane signaling receptor activity;GO:0008528//G-protein coupled peptide receptor activity;GO:0099600//transmembrane receptor activity;GO:0004930//G-protein coupled receptor activity;GO:0004896//cytokine receptor activity;GO:0001653//peptide receptor activity;GO:0038023//signaling receptor activity;GO:0060089//molecular transducer activity;GO:0001637//G-protein coupled chemoatt…	GO:0007154//cell communication;GO:0070887//cellular response to chemical stimulus;GO:0050896//response to stimulus;GO:0071345//cellular response to cytokine stimulus;GO:0010033//response to organic substance;GO:0044699//single-organism process;GO:0009987//cellular process;GO:0051716//cellular response to stimulus;GO:0007166//cell surface receptor signaling pathway;GO:0007165//signal transduction;…
TCONS_00029479	1809.19	5.70667	62.4367	0.143333	-8.76688	3.43229e-11	1.02531e-08	yes	UBE3D	XP_017908415.1 PREDICTED: E3 ubiquitin-protein ligase E3D isoform X1 [Capra hircus]	-	-	-	-	-	GO:0003824//catalytic activity	GO:0009987//cellular process;GO:0043412//macromolecule modification;GO:0070647//protein modification by small protein conjugation or removal;GO:0044237//cellular metabolic process;GO:0032446//protein modification by small protein conjugation;GO:0008152//metabolic process;GO:0043170//macromolecule metabolic process;GO:0071704//organic substance metabolic process;GO:0044238//primary metabolic proce…
TCONS_00029852	1102.56	7.83	44.4733	0.216667	-7.68132	9.66238e-11	2.47168e-08	yes	THEMIS	XP_006058911.1 PREDICTED: protein THEMIS isoform X5 [Bubalus bubalis]	-	-	-	-	GO:0044464//cell part;GO:0043229//intracellular organelle;GO:0043227//membrane-bounded organelle;GO:0005622//intracellular;GO:0032991//macromolecular complex;GO:0030054//cell junction;GO:0043226//organelle;GO:0043231//intracellular membrane-bounded organelle;GO:0005623//cell;GO:0044424//intracellular part;GO:0043234//protein complex	-	GO:0044763//single-organism cellular process;GO:0007155//cell adhesion;GO:0023052//signaling;GO:0030097//hemopoiesis;GO:0002684//positive regulation of immune system process;GO:0048584//positive regulation of response to stimulus;GO:0002764//immune response-regulating signaling pathway;GO:0022610//biological adhesion;GO:0098609//cell-cell adhesion;GO:0044699//single-organism process;GO:0002768//i…
TCONS_00029853	753.15	2.80333	26.49	0.06	-8.78627	1.64213e-12	7.00215e-10	yes	THEMIS	XP_005684781.2 PREDICTED: protein THEMIS [Capra hircus]	-	-	-	-	GO:0043234//protein complex;GO:0032991//macromolecular complex;GO:0043227//membrane-bounded organelle;GO:0005622//intracellular;GO:0043226//organelle;GO:0005623//cell;GO:0044424//intracellular part;GO:0044464//cell part;GO:0043229//intracellular organelle;GO:0043231//intracellular membrane-bounded organelle;GO:0030054//cell junction	-	GO:0051716//cellular response to stimulus;GO:0007165//signal transduction;GO:0042110//T cell activation;GO:0045058//T cell selection;GO:0002376//immune system process;GO:0007159//leukocyte cell-cell adhesion;GO:0007275//multicellular organism development;GO:0070489//T cell aggregation;GO:0048584//positive regulation of response to stimulus;GO:0071593//lymphocyte aggregation;GO:0007154//cell commu…
TCONS_00029894	49.85	0	0.74	0.001	-9.53138	0.000398643	0.0110315	yes	MED23	XP_017908713.1 PREDICTED: mediator of RNA polymerase II transcription subunit 23 isoform X3 [Capra hircus]	-	-	-	-	GO:0032991//macromolecular complex;GO:0043234//protein complex	-	GO:0019222//regulation of metabolic process;GO:0050789//regulation of biological process;GO:0010468//regulation of gene expression;GO:0065007//biological regulation;GO:0060255//regulation of macromolecule metabolic process
TCONS_00030111	232.183	2.39667	2.19667	0.0166667	-7.04221	1.84061e-07	1.6484e-05	yes	ULBP3	XP_014960633.1 PREDICTED: LOW QUALITY PROTEIN: NKG2D ligand 1-like isoform X1 [Ovis aries]	Organismal Systems	Immune system	ko04650//Natural killer cell mediated cytotoxicity	K07986	-	-	-
TCONS_00030150	994.163	0	2.94333	0.001	-11.5232	2.61566e-14	1.73766e-11	yes	SYNE1	XP_017908867.1 PREDICTED: nesprin-1 isoform X9 [Capra hircus]	-	-	-	-	GO:0043226//organelle;GO:0005622//intracellular;GO:0031975//envelope;GO:0098805//whole membrane;GO:0071944//cell periphery;GO:0031967//organelle envelope;GO:0045202//synapse;GO:0043231//intracellular membrane-bounded organelle;GO:0044422//organelle part;GO:0044428//nuclear part;GO:0005737//cytoplasm;GO:0043232//intracellular non-membrane-bounded organelle;GO:0097060//synaptic membrane;GO:0043228/…	GO:0046983//protein dimerization activity;GO:0003676//nucleic acid binding;GO:0005488//binding;GO:0008092//cytoskeletal protein binding;GO:0005515//protein binding;GO:0097159//organic cyclic compound binding;GO:0003779//actin binding;GO:0003723//RNA binding;GO:1901363//heterocyclic compound binding	GO:0043578//nuclear matrix organization;GO:0051641//cellular localization;GO:0044699//single-organism process;GO:0051647//nucleus localization;GO:0051640//organelle localization;GO:0051179//localization;GO:0006997//nucleus organization;GO:0044763//single-organism cellular process;GO:0016043//cellular component organization;GO:0044767//single-organism developmental process;GO:0006996//organelle or…
TCONS_00030240	62.8533	0	1.56	0.001	-10.6073	0.000182894	0.00589821	yes	EZR	XP_011988234.1 PREDICTED: ezrin isoform X2 [Ovis aries musimon]	Organismal Systems;Cellular Processes	Immune system;Digestive system;Cell motility	ko04810//Regulation of actin cytoskeleton;ko04670//Leukocyte transendothelial migration;ko04971//Gastric acid secretion	K08007	GO:0005576//extracellular region;GO:0015629//actin cytoskeleton;GO:0044430//cytoskeletal part;GO:0005912//adherens junction;GO:0031982//vesicle;GO:0044422//organelle part;GO:0098805//whole membrane;GO:0005924//cell-substrate adherens junction;GO:0098589//membrane region;GO:0030055//cell-substrate junction;GO:0031988//membrane-bounded vesicle;GO:0005902//microvillus;GO:0005815//microtubule organiz…	GO:0008092//cytoskeletal protein binding;GO:0005488//binding;GO:0005515//protein binding;GO:0003779//actin binding;GO:1901363//heterocyclic compound binding;GO:0003676//nucleic acid binding;GO:0003723//RNA binding;GO:0097159//organic cyclic compound binding	GO:0045446//endothelial cell differentiation;GO:0051128//regulation of cellular component organization;GO:0016337//single organismal cell-cell adhesion;GO:0098602//single organism cell adhesion;GO:0001885//endothelial cell development;GO:0071704//organic substance metabolic process;GO:0044085//cellular component biogenesis;GO:0030855//epithelial cell differentiation;GO:0050789//regulation of biol…
TCONS_00030683	101.827	0.0233333	0.846667	0.001	-9.72565	0.000463729	0.0123301	yes	CCDC177	XP_017909527.1 PREDICTED: coiled-coil domain-containing protein 177 [Capra hircus]	-	-	-	-	-	-	-
TCONS_00030740	220.98	8.06	2.93667	0.0666667	-5.46107	0.000118759	0.00422876	yes	TMEM229B	XP_012037262.1 PREDICTED: transmembrane protein 229B isoform X1 [Ovis aries]	-	-	-	-	-	-	-
TCONS_00030769	190.367	1.89667	1.66333	0.01	-7.37793	0.000251718	0.00761138	yes	SPTB	XP_017909555.1 PREDICTED: LOW QUALITY PROTEIN: spectrin beta chain, erythrocytic [Capra hircus]	-	-	-	-	GO:0009898//cytoplasmic side of plasma membrane;GO:0044424//intracellular part;GO:0044444//cytoplasmic part;GO:0032991//macromolecular complex;GO:0005623//cell;GO:0044422//organelle part;GO:0044446//intracellular organelle part;GO:0005886//plasma membrane;GO:0043229//intracellular organelle;GO:0044430//cytoskeletal part;GO:0016020//membrane;GO:0071944//cell periphery;GO:0098562//cytoplasmic side …	GO:0005515//protein binding;GO:0003779//actin binding;GO:0008289//lipid binding;GO:0046983//protein dimerization activity;GO:0005198//structural molecule activity;GO:0005488//binding;GO:0008092//cytoskeletal protein binding	GO:0042330//taxis;GO:1901880//negative regulation of protein depolymerization;GO:1901879//regulation of protein depolymerization;GO:0006935//chemotaxis;GO:0044767//single-organism developmental process;GO:0071840//cellular component organization or biogenesis;GO:0030832//regulation of actin filament length;GO:0030834//regulation of actin filament depolymerization;GO:0051128//regulation of cellula…
TCONS_00031058	188.397	0	2.67333	0.001	-11.3844	8.36196e-05	0.0031622	yes	TCF12	XP_017909749.1 PREDICTED: transcription factor 12 isoform X3 [Capra hircus]	-	-	-	-	GO:0043229//intracellular organelle;GO:0044464//cell part;GO:0043234//protein complex;GO:0032991//macromolecular complex;GO:0005623//cell;GO:0044424//intracellular part;GO:0043227//membrane-bounded organelle;GO:0043231//intracellular membrane-bounded organelle;GO:0043226//organelle;GO:0005622//intracellular	GO:0044212//transcription regulatory region DNA binding;GO:0046983//protein dimerization activity;GO:0008134//transcription factor binding;GO:0003676//nucleic acid binding;GO:0005488//binding;GO:0097159//organic cyclic compound binding;GO:0000975//regulatory region DNA binding;GO:0001071//nucleic acid binding transcription factor activity;GO:0003677//DNA binding;GO:0005515//protein binding;GO:190…	GO:0009889//regulation of biosynthetic process;GO:0010468//regulation of gene expression;GO:2000112//regulation of cellular macromolecule biosynthetic process;GO:2001141//regulation of RNA biosynthetic process;GO:0019222//regulation of metabolic process;GO:0050793//regulation of developmental process;GO:0010556//regulation of macromolecule biosynthetic process;GO:0045595//regulation of cell diffe…
TCONS_00031559	20.3933	882.943	1.25333	27.57	4.45926	0.00131913	0.0279459	yes	EDDM3B	XP_017909265.1 PREDICTED: epididymal secretory protein E3-beta-like [Capra hircus]	-	-	-	-	-	-	-
TCONS_00031609	63.5833	0.666667	1.38667	0.01	-7.11548	0.00125514	0.0269815	yes	-	ELR44680.1 T-cell receptor alpha chain V region 2B4, partial [Bos mutus]	Environmental Information Processing;Organismal Systems	Immune system;Signaling molecules and interaction;Signal transduction	ko04014//Ras signaling pathway;ko04015//Rap1 signaling pathway;ko04020//Calcium signaling pathway;ko04514//Cell adhesion molecules (CAMs);ko04660//T cell receptor signaling pathway;ko04064//NF-kappa B signaling pathway;ko04612//Antigen processing and presentation;ko04672//Intestinal immune network for IgA production	K10784	-	-	-
TCONS_00031708	46.9333	0	6.33333	0.001	-12.6287	0.00188679	0.0367532	yes	-	AAK09293.1 T-cell receptor alpha chain, partial [Capra hircus]	-	-	-	-	-	-	-
TCONS_00031729	656.557	14.5967	27.1767	0.373333	-6.18576	1.14934e-06	8.34537e-05	yes	TRDC	XP_014945977.1 PREDICTED: uncharacterized protein LOC101106528 isoform X3 [Ovis aries musimon]	-	-	-	-	-	-	-
TCONS_00031734	2011.63	47.9733	96.2533	1.43333	-6.06939	1.31441e-12	5.7925e-10	yes	TRDC	CAA78307.1 TCR delta, partial [Ovis aries]	-	-	-	-	-	-	-
TCONS_00031745	2541.58	26.1833	155.7	1.14667	-7.08518	3.56489e-05	0.00156174	yes	TRAC	AAA63518.1 T-cell receptor alpha [Ovis aries]	-	-	-	-	-	-	-
TCONS_00031749	615.097	0	39.0867	0.001	-15.2544	6.64968e-15	5.10306e-12	yes	TRAC	AAA63518.1 T-cell receptor alpha [Ovis aries]	-	-	-	-	-	-	-
TCONS_00031752	138.973	1.36	8	0.0466667	-7.42146	2.65706e-05	0.00121119	yes	TRAC	AAA63518.1 T-cell receptor alpha [Ovis aries]	-	-	-	-	-	-	-
TCONS_00031755	259.58	0	14.9567	0.001	-13.8685	6.63574e-07	5.16358e-05	yes	TRAC	AAA63518.1 T-cell receptor alpha [Ovis aries]	-	-	-	-	-	-	-
TCONS_00031757	152.73	0	11.05	0.001	-13.4318	1.37697e-07	1.2822e-05	yes	TRAC	AAA63518.1 T-cell receptor alpha [Ovis aries]	-	-	-	-	-	-	-
TCONS_00032057	36.17	0	0.733333	0.001	-9.51833	0.00137925	0.0288625	yes	CLPX	XP_005685159.1 PREDICTED: ATP-dependent Clp protease ATP-binding subunit clpX-like, mitochondrial [Capra hircus]	-	-	-	-	GO:0009295//nucleoid;GO:0043226//organelle;GO:0005623//cell;GO:0031975//envelope;GO:0016020//membrane;GO:0044444//cytoplasmic part;GO:0043229//intracellular organelle;GO:0005622//intracellular;GO:0031090//organelle membrane;GO:0044424//intracellular part;GO:0031967//organelle envelope;GO:0009368//endopeptidase Clp complex;GO:0044422//organelle part;GO:0044429//mitochondrial part;GO:0043231//intra…	GO:0016887//ATPase activity;GO:0016462//pyrophosphatase activity;GO:0030234//enzyme regulator activity;GO:0097367//carbohydrate derivative binding;GO:0032549//ribonucleoside binding;GO:0008047//enzyme activator activity;GO:0016818//hydrolase activity, acting on acid anhydrides, in phosphorus-containing anhydrides;GO:0016817//hydrolase activity, acting on acid anhydrides;GO:0098772//molecular func…	GO:0051246//regulation of protein metabolic process;GO:0030162//regulation of proteolysis;GO:0048522//positive regulation of cellular process;GO:0032270//positive regulation of cellular protein metabolic process;GO:0032268//regulation of cellular protein metabolic process;GO:0019222//regulation of metabolic process;GO:0009893//positive regulation of metabolic process;GO:0060255//regulation of mac…
TCONS_00032334	44.01	0	0.53	0.001	-9.04985	0.00101259	0.0229365	yes	Nrxn3	XP_017909394.1 PREDICTED: neurexin 3 isoform X7 [Capra hircus]	Environmental Information Processing	Signaling molecules and interaction	ko04514//Cell adhesion molecules (CAMs)	K07377	-	-	GO:0022607//cellular component assembly;GO:0001505//regulation of neurotransmitter levels;GO:0007610//behavior;GO:0044700//single organism signaling;GO:0044699//single-organism process;GO:0007611//learning or memory;GO:0065008//regulation of biological quality;GO:0016043//cellular component organization;GO:0048518//positive regulation of biological process;GO:0044708//single-organism behavior;GO:…
TCONS_00032363	0	122	0.001	1.34667	10.3952	0.00209607	0.0398532	yes	CIPC	XP_017909415.1 PREDICTED: CLOCK-interacting pacemaker [Capra hircus]	-	-	-	-	-	-	-
TCONS_00032823	139.52	0	0.796667	0.001	-9.63783	0.000355878	0.01007	yes	MYEF2	XP_006077893.1 PREDICTED: myelin expression factor 2 isoform X1 [Bubalus bubalis]	-	-	-	-	-	GO:0005488//binding;GO:0097159//organic cyclic compound binding	-
TCONS_00032884	636.66	67.06	3.97333	0.236667	-4.06942	0.0007622	0.0182535	yes	MYO5A	XP_011974040.1 PREDICTED: unconventional myosin-Va isoform X2 [Ovis aries musimon]	-	-	-	-	GO:0005622//intracellular;GO:0044424//intracellular part;GO:0031513//nonmotile primary cilium;GO:0044446//intracellular organelle part;GO:0098858//actin-based cell projection;GO:0044430//cytoskeletal part;GO:0099503//secretory vesicle;GO:0031410//cytoplasmic vesicle;GO:0043231//intracellular membrane-bounded organelle;GO:0005856//cytoskeleton;GO:0005929//cilium;GO:0031252//cell leading edge;GO:00…	GO:0017016//Ras GTPase binding;GO:0003824//catalytic activity;GO:1901363//heterocyclic compound binding;GO:0046872//metal ion binding;GO:0016817//hydrolase activity, acting on acid anhydrides;GO:0016462//pyrophosphatase activity;GO:0003676//nucleic acid binding;GO:0003723//RNA binding;GO:0032550//purine ribonucleoside binding;GO:0043167//ion binding;GO:0005488//binding;GO:0019899//enzyme binding;…	GO:0048869//cellular developmental process;GO:0043434//response to peptide hormone;GO:0040011//locomotion;GO:0071840//cellular component organization or biogenesis;GO:0007275//multicellular organism development;GO:1901615//organic hydroxy compound metabolic process;GO:0010033//response to organic substance;GO:0032940//secretion by cell;GO:0030048//actin filament-based movement;GO:0043473//pigment…
TCONS_00032959	232.46	0	4.41667	0.001	-12.1087	1.06106e-09	2.04449e-07	yes	MNS1	XP_005685785.1 PREDICTED: meiosis-specific nuclear structural protein 1 [Capra hircus]	-	-	-	-	GO:0031514//motile cilium;GO:0043229//intracellular organelle;GO:0044422//organelle part;GO:0042995//cell projection;GO:0043227//membrane-bounded organelle;GO:0005622//intracellular;GO:0005929//cilium;GO:0043226//organelle;GO:0043234//protein complex;GO:0044464//cell part;GO:0044441//ciliary part;GO:0043231//intracellular membrane-bounded organelle;GO:0044463//cell projection part;GO:0044424//int…	GO:0005488//binding;GO:0005515//protein binding	GO:0016043//cellular component organization;GO:0009987//cellular process;GO:0044763//single-organism cellular process;GO:0007389//pattern specification process;GO:0044767//single-organism developmental process;GO:0044699//single-organism process;GO:0009798//axis specification;GO:0032501//multicellular organismal process;GO:0071840//cellular component organization or biogenesis;GO:0032502//develop…
TCONS_00033138	75.8667	2.75	1.63333	0.0333333	-5.61471	0.00140627	0.0292492	yes	PTGDR	XP_005956315.1 PREDICTED: prostaglandin D2 receptor-like [Pantholops hodgsonii]	Environmental Information Processing	Signaling molecules and interaction	ko04080//Neuroactive ligand-receptor interaction	K04332	GO:0016020//membrane;GO:0044425//membrane part;GO:0031224//intrinsic component of membrane	GO:0004953//icosanoid receptor activity;GO:0004930//G-protein coupled receptor activity;GO:0060089//molecular transducer activity;GO:0099600//transmembrane receptor activity;GO:0004954//prostanoid receptor activity;GO:0004871//signal transducer activity;GO:0004872//receptor activity;GO:0038023//signaling receptor activity;GO:0004888//transmembrane signaling receptor activity;GO:0004955//prostagla…	GO:0007154//cell communication;GO:0003006//developmental process involved in reproduction;GO:0055086//nucleobase-containing small molecule metabolic process;GO:0044763//single-organism cellular process;GO:0008152//metabolic process;GO:0033993//response to lipid;GO:0050896//response to stimulus;GO:0072521//purine-containing compound metabolic process;GO:0007166//cell surface receptor signaling pat…
TCONS_00033139	191.177	11.4667	5.22667	0.186667	-4.80735	9.52225e-05	0.00351439	yes	PTGDR	XP_005956315.1 PREDICTED: prostaglandin D2 receptor-like [Pantholops hodgsonii]	Environmental Information Processing	Signaling molecules and interaction	ko04080//Neuroactive ligand-receptor interaction	K04332	GO:0044425//membrane part;GO:0031224//intrinsic component of membrane;GO:0016020//membrane	GO:0004953//icosanoid receptor activity;GO:0004871//signal transducer activity;GO:0099600//transmembrane receptor activity;GO:0004872//receptor activity;GO:0004954//prostanoid receptor activity;GO:0004930//G-protein coupled receptor activity;GO:0004888//transmembrane signaling receptor activity;GO:0060089//molecular transducer activity;GO:0038023//signaling receptor activity;GO:0004955//prostagla…	GO:0071704//organic substance metabolic process;GO:0007154//cell communication;GO:0070542//response to fatty acid;GO:0044237//cellular metabolic process;GO:0006807//nitrogen compound metabolic process;GO:0009116//nucleoside metabolic process;GO:0042278//purine nucleoside metabolic process;GO:0071310//cellular response to organic substance;GO:0007166//cell surface receptor signaling pathway;GO:000…
TCONS_00033495	50.64	0	2.30667	0.001	-11.1716	0.000398853	0.0110315	yes	HNRNPC	XP_013974949.1 PREDICTED: heterogeneous nuclear ribonucleoproteins C1/C2 isoform X5 [Canis lupus familiaris]	Genetic Information Processing	Transcription	ko03040//Spliceosome	K12884	GO:0043229//intracellular organelle;GO:0044424//intracellular part;GO:0043226//organelle;GO:0005623//cell;GO:0032991//macromolecular complex;GO:0044464//cell part;GO:1990904//ribonucleoprotein complex;GO:0030529//intracellular ribonucleoprotein complex;GO:0005622//intracellular;GO:0043227//membrane-bounded organelle;GO:0043231//intracellular membrane-bounded organelle	GO:1901363//heterocyclic compound binding;GO:0003676//nucleic acid binding;GO:0097159//organic cyclic compound binding;GO:0005488//binding	GO:0044238//primary metabolic process;GO:0044237//cellular metabolic process;GO:0046483//heterocycle metabolic process;GO:0010467//gene expression;GO:0090304//nucleic acid metabolic process;GO:0006725//cellular aromatic compound metabolic process;GO:0043170//macromolecule metabolic process;GO:0034641//cellular nitrogen compound metabolic process;GO:0008152//metabolic process;GO:0044260//cellular …
TCONS_00033763	211.27	0	4.36333	0.001	-12.0912	4.6727e-09	7.00276e-07	yes	KIF23	XP_015328522.1 PREDICTED: kinesin-like protein KIF23 isoform X4 [Bos taurus]	-	-	-	-	-	-	-
TCONS_00033780	107.087	0	1.40333	0.001	-10.4546	0.000547334	0.0140091	yes	GLCE	XP_012008331.1 PREDICTED: D-glucuronyl C5-epimerase isoform X2 [Ovis aries musimon]	Metabolism	Global and Overview;Glycan biosynthesis and metabolism	ko01100//Metabolic pathways;ko00534//Glycosaminoglycan biosynthesis - heparan sulfate / heparin	K01793	GO:0044425//membrane part;GO:0016020//membrane;GO:0031224//intrinsic component of membrane;GO:0043226//organelle;GO:0043229//intracellular organelle;GO:0005623//cell;GO:0043227//membrane-bounded organelle;GO:0043231//intracellular membrane-bounded organelle;GO:0044464//cell part;GO:0005622//intracellular;GO:0044424//intracellular part	GO:0003824//catalytic activity;GO:0016853//isomerase activity;GO:0016854//racemase and epimerase activity;GO:0016857//racemase and epimerase activity, acting on carbohydrates and derivatives	GO:0030166//proteoglycan biosynthetic process;GO:0006029//proteoglycan metabolic process;GO:0034645//cellular macromolecule biosynthetic process;GO:0006023//aminoglycan biosynthetic process;GO:1901135//carbohydrate derivative metabolic process;GO:0009059//macromolecule biosynthetic process;GO:1901564//organonitrogen compound metabolic process;GO:0044710//single-organism metabolic process;GO:00442…
TCONS_00034056	29.63	0	0.63	0.001	-9.29921	0.0027015	0.0482906	yes	BUB1	XP_017910304.1 PREDICTED: mitotic checkpoint serine/threonine-protein kinase BUB1 isoform X3 [Capra hircus]	Organismal Systems;Cellular Processes	Cell growth and death;Endocrine system	ko04110//Cell cycle;ko04114//Oocyte meiosis;ko04914//Progesterone-mediated oocyte maturation	K02178	GO:0005694//chromosome;GO:0044446//intracellular organelle part;GO:0043227//membrane-bounded organelle;GO:0032991//macromolecular complex;GO:0044464//cell part;GO:0005623//cell;GO:0043234//protein complex;GO:0000776//kinetochore;GO:0044427//chromosomal part;GO:0043232//intracellular non-membrane-bounded organelle;GO:0043228//non-membrane-bounded organelle;GO:0000779//condensed chromosome, centrom…	GO:0097367//carbohydrate derivative binding;GO:0004672//protein kinase activity;GO:0032549//ribonucleoside binding;GO:0001882//nucleoside binding;GO:0036094//small molecule binding;GO:1901363//heterocyclic compound binding;GO:0016772//transferase activity, transferring phosphorus-containing groups;GO:0032550//purine ribonucleoside binding;GO:0016740//transferase activity;GO:0001883//purine nucleo…	GO:0009987//cellular process;GO:0000278//mitotic cell cycle;GO:0010564//regulation of cell cycle process;GO:0065007//biological regulation;GO:0006915//apoptotic process;GO:0035556//intracellular signal transduction;GO:0050896//response to stimulus;GO:0050789//regulation of biological process;GO:0051726//regulation of cell cycle;GO:0007049//cell cycle;GO:0043412//macromolecule modification;GO:0097…
TCONS_00034109	254.38	1.34	5.47667	0.0166667	-8.36019	3.9673e-08	4.36011e-06	yes	Zap70	XP_017910370.1 PREDICTED: tyrosine-protein kinase ZAP-70 [Capra hircus]	Organismal Systems;Environmental Information Processing	Immune system;Signal transduction	ko04014//Ras signaling pathway;ko04650//Natural killer cell mediated cytotoxicity;ko04660//T cell receptor signaling pathway;ko04064//NF-kappa B signaling pathway	K07360	-	-	-
TCONS_00034165	562.69	120.077	5.69	0.753333	-2.91707	0.000243734	0.00743523	yes	MAP4K4	XP_017910443.1 PREDICTED: mitogen-activated protein kinase kinase kinase kinase 4 isoform X24 [Capra hircus]	Environmental Information Processing	Signal transduction	ko04010//MAPK signaling pathway	K04407	-	GO:0097367//carbohydrate derivative binding;GO:0005488//binding;GO:0003824//catalytic activity;GO:0097159//organic cyclic compound binding;GO:1901363//heterocyclic compound binding;GO:0016772//transferase activity, transferring phosphorus-containing groups;GO:0016301//kinase activity;GO:0001882//nucleoside binding;GO:0036094//small molecule binding;GO:0004672//protein kinase activity;GO:0001883//…	GO:0036211//protein modification process;GO:0008152//metabolic process;GO:0043170//macromolecule metabolic process;GO:0071704//organic substance metabolic process;GO:0044267//cellular protein metabolic process;GO:0044237//cellular metabolic process;GO:0009987//cellular process;GO:0006464//cellular protein modification process;GO:0043412//macromolecule modification;GO:0044260//cellular macromolecu…
TCONS_00034168	314.947	12.55	2.8	0.0766667	-5.19068	0.0021521	0.0407096	yes	Tnik	XP_017910434.1 PREDICTED: mitogen-activated protein kinase kinase kinase kinase 4 isoform X16 [Capra hircus]	Environmental Information Processing	Signal transduction	ko04010//MAPK signaling pathway	K04407	-	GO:0016773//phosphotransferase activity, alcohol group as acceptor;GO:0001883//purine nucleoside binding;GO:0016301//kinase activity;GO:0004672//protein kinase activity;GO:0016740//transferase activity;GO:0097367//carbohydrate derivative binding;GO:0003824//catalytic activity;GO:0005488//binding;GO:0032550//purine ribonucleoside binding;GO:0032549//ribonucleoside binding;GO:0036094//small molecul…	GO:0006464//cellular protein modification process;GO:0019538//protein metabolic process;GO:0044237//cellular metabolic process;GO:0044267//cellular protein metabolic process;GO:0043170//macromolecule metabolic process;GO:0044238//primary metabolic process;GO:0044260//cellular macromolecule metabolic process;GO:0036211//protein modification process;GO:0008152//metabolic process;GO:0043412//macromo…
TCONS_00034169	234.88	12.15	2.40333	0.0766667	-4.97029	0.00276416	0.049086	yes	Map4k4	XP_017910431.1 PREDICTED: mitogen-activated protein kinase kinase kinase kinase 4 isoform X13 [Capra hircus]	Environmental Information Processing	Signal transduction	ko04010//MAPK signaling pathway	K04407	-	GO:0016301//kinase activity;GO:0097367//carbohydrate derivative binding;GO:1901363//heterocyclic compound binding;GO:0003824//catalytic activity;GO:0036094//small molecule binding;GO:0097159//organic cyclic compound binding;GO:0005488//binding;GO:0001882//nucleoside binding;GO:0016740//transferase activity;GO:0032550//purine ribonucleoside binding;GO:0016772//transferase activity, transferring ph…	GO:0019538//protein metabolic process;GO:0044267//cellular protein metabolic process;GO:0044238//primary metabolic process;GO:0044237//cellular metabolic process;GO:0009987//cellular process;GO:0071704//organic substance metabolic process;GO:0008152//metabolic process;GO:0043170//macromolecule metabolic process;GO:0036211//protein modification process;GO:0043412//macromolecule modification;GO:004…
TCONS_00034848	4433.36	29.63	119.72	0.566667	-7.72295	1.65603e-08	2.0532e-06	yes	CD8A	XP_017910842.1 PREDICTED: T-cell surface glycoprotein CD8 alpha chain [Capra hircus]	Organismal Systems;Environmental Information Processing	Signaling molecules and interaction;Immune system	ko04514//Cell adhesion molecules (CAMs);ko04660//T cell receptor signaling pathway;ko04640//Hematopoietic cell lineage;ko04612//Antigen processing and presentation	K06458	GO:0044425//membrane part;GO:0016020//membrane;GO:0005623//cell;GO:0005886//plasma membrane;GO:0044464//cell part;GO:0031224//intrinsic component of membrane;GO:0044459//plasma membrane part;GO:0071944//cell periphery	GO:0046983//protein dimerization activity;GO:0005488//binding;GO:0005515//protein binding	GO:0009987//cellular process;GO:0002252//immune effector process;GO:0030217//T cell differentiation;GO:0042110//T cell activation;GO:0044707//single-multicellular organism process;GO:0048534//hematopoietic or lymphoid organ development;GO:0070486//leukocyte aggregation;GO:0032502//developmental process;GO:0065007//biological regulation;GO:0001775//cell activation;GO:0002376//immune system process…
TCONS_00035907	46.2133	0	0.606667	0.001	-9.24476	0.0019974	0.0383822	yes	ENTPD8	XP_017911715.1 PREDICTED: ectonucleoside triphosphate diphosphohydrolase 8 isoform X1 [Capra hircus]	Metabolism	Nucleotide metabolism	ko00230//Purine metabolism;ko00240//Pyrimidine metabolism	K01510	GO:0031224//intrinsic component of membrane;GO:0016020//membrane;GO:0044425//membrane part	GO:0036094//small molecule binding;GO:0043167//ion binding;GO:0005488//binding;GO:0003824//catalytic activity;GO:0043169//cation binding;GO:0016787//hydrolase activity;GO:0016818//hydrolase activity, acting on acid anhydrides, in phosphorus-containing anhydrides;GO:0016817//hydrolase activity, acting on acid anhydrides;GO:0016462//pyrophosphatase activity	GO:0009132//nucleoside diphosphate metabolic process;GO:1901360//organic cyclic compound metabolic process;GO:0044238//primary metabolic process;GO:0006139//nucleobase-containing compound metabolic process;GO:0044281//small molecule metabolic process;GO:0055086//nucleobase-containing small molecule metabolic process;GO:0044237//cellular metabolic process;GO:0008152//metabolic process;GO:0009123//…
TCONS_00035971	118.98	2.99333	3.55	0.0533333	-6.05664	0.00132607	0.0280662	yes	ACOXL	XP_012029285.1 PREDICTED: acyl-coenzyme A oxidase-like protein isoform X1 [Ovis aries]	-	-	-	-	GO:0043226//organelle;GO:0043229//intracellular organelle;GO:0005623//cell;GO:0044464//cell part;GO:0042579//microbody;GO:0005737//cytoplasm;GO:0043227//membrane-bounded organelle;GO:0044424//intracellular part;GO:0043231//intracellular membrane-bounded organelle;GO:0044444//cytoplasmic part;GO:0005622//intracellular	GO:0036094//small molecule binding;GO:0097159//organic cyclic compound binding;GO:0005488//binding;GO:0003824//catalytic activity;GO:0016627//oxidoreductase activity, acting on the CH-CH group of donors;GO:1901363//heterocyclic compound binding;GO:0016634//oxidoreductase activity, acting on the CH-CH group of donors, oxygen as acceptor;GO:0000166//nucleotide binding;GO:1901265//nucleoside phospha…	GO:0044281//small molecule metabolic process;GO:0044238//primary metabolic process;GO:0032787//monocarboxylic acid metabolic process;GO:0006629//lipid metabolic process;GO:0043436//oxoacid metabolic process;GO:0044248//cellular catabolic process;GO:0016054//organic acid catabolic process;GO:0044237//cellular metabolic process;GO:0006082//organic acid metabolic process;GO:0006631//fatty acid metab…
TCONS_00036045	61.14	0	1.47667	0.001	-10.5281	0.00223283	0.0418387	yes	SEMA4C	XP_017910360.1 PREDICTED: semaphorin-4C isoform X1 [Capra hircus]	Organismal Systems	Development	ko04360//Axon guidance	K06521	GO:0045202//synapse;GO:0044422//organelle part;GO:0044421//extracellular region part;GO:0043229//intracellular organelle;GO:0005622//intracellular;GO:0043226//organelle;GO:0031982//vesicle;GO:0044424//intracellular part;GO:0044464//cell part;GO:0044433//cytoplasmic vesicle part;GO:0005737//cytoplasm;GO:0005623//cell;GO:0044446//intracellular organelle part;GO:0005576//extracellular region;GO:0031…	GO:0060089//molecular transducer activity	GO:0023052//signaling;GO:0031323//regulation of cellular metabolic process;GO:0070302//regulation of stress-activated protein kinase signaling cascade;GO:0043408//regulation of MAPK cascade;GO:0007165//signal transduction;GO:0048583//regulation of response to stimulus;GO:0042325//regulation of phosphorylation;GO:0032268//regulation of cellular protein metabolic process;GO:0044767//single-organism…
TCONS_00036096	1567.69	162.5	9.58333	0.61	-3.97365	2.08598e-06	0.000138371	yes	AFF3	XP_014962108.1 PREDICTED: AF4/FMR2 family member 3 isoform X6 [Ovis aries musimon]	-	-	-	-	GO:0043231//intracellular membrane-bounded organelle;GO:0005622//intracellular;GO:0043229//intracellular organelle;GO:0043227//membrane-bounded organelle;GO:0043226//organelle;GO:0044464//cell part;GO:0005623//cell;GO:0044424//intracellular part	-	GO:0044767//single-organism developmental process;GO:0050896//response to stimulus;GO:0042221//response to chemical;GO:0035108//limb morphogenesis;GO:0009790//embryo development;GO:0048598//embryonic morphogenesis;GO:0034097//response to cytokine;GO:0048736//appendage development;GO:0044699//single-organism process;GO:0032502//developmental process;GO:0030326//embryonic limb morphogenesis;GO:0010…
TCONS_00036107	231.407	23.66	3.75	0.216667	-4.11334	0.000157142	0.00525894	yes	X-element\ORF2	ELR61013.1 hypothetical protein M91_09415, partial [Bos mutus]	-	-	-	-	-	-	-
TCONS_00036230	170.167	0	2.13333	0.001	-11.0589	0.00139204	0.0290432	yes	DYSF	XP_017910543.1 PREDICTED: dysferlin isoform X4 [Capra hircus]	-	-	-	-	GO:0044464//cell part;GO:0044422//organelle part;GO:0031982//vesicle;GO:0016020//membrane;GO:0031252//cell leading edge;GO:0043226//organelle;GO:0031224//intrinsic component of membrane;GO:0043227//membrane-bounded organelle;GO:0031988//membrane-bounded vesicle;GO:0005623//cell;GO:0031090//organelle membrane;GO:0071944//cell periphery;GO:0012506//vesicle membrane;GO:0005886//plasma membrane;GO:00…	GO:0005488//binding;GO:0043167//ion binding;GO:0043168//anion binding;GO:0043169//cation binding;GO:0005543//phospholipid binding;GO:0008289//lipid binding;GO:0046872//metal ion binding	GO:0016050//vesicle organization;GO:0009987//cellular process;GO:0071840//cellular component organization or biogenesis;GO:0016043//cellular component organization;GO:0006996//organelle organization
TCONS_00036276	54.6833	0	1.34	0.001	-10.388	0.000925158	0.021281	yes	NLRC4	XP_005686455.2 PREDICTED: NLR family CARD domain-containing protein 4 [Capra hircus]	Organismal Systems	Immune system	ko04621//NOD-like receptor signaling pathway	K12805	-	-	-
TCONS_00036733	1452.8	365.957	30.9667	4.36	-2.82832	0.00181267	0.0357317	yes	MAT2A	EDK98983.1 mCG129313, isoform CRA_b, partial [Mus musculus]	Metabolism	Amino acid metabolism;Global and Overview	ko01100//Metabolic pathways;ko01110//Biosynthesis of secondary metabolites;ko01230//Biosynthesis of amino acids;ko00270//Cysteine and methionine metabolism	K00789	-	-	-
TCONS_00036955	37.87	0	1.82667	0.001	-10.835	0.00149568	0.0307442	yes	SPDYA	XP_014963996.1 PREDICTED: speedy protein A isoform X1 [Ovis aries musimon]	Cellular Processes;Organismal Systems	Endocrine system;Cell growth and death	ko04114//Oocyte meiosis;ko04914//Progesterone-mediated oocyte maturation	K08694	GO:0043227//membrane-bounded organelle;GO:0005622//intracellular;GO:0044464//cell part;GO:0044424//intracellular part;GO:0043226//organelle;GO:0043229//intracellular organelle;GO:0043231//intracellular membrane-bounded organelle;GO:0005623//cell	GO:0019899//enzyme binding;GO:0019900//kinase binding;GO:0005488//binding;GO:0005515//protein binding	GO:0080090//regulation of primary metabolic process;GO:0022414//reproductive process;GO:0006996//organelle organization;GO:0000003//reproduction;GO:0000079//regulation of cyclin-dependent protein serine/threonine kinase activity;GO:0051726//regulation of cell cycle;GO:0048285//organelle fission;GO:0051716//cellular response to stimulus;GO:0031399//regulation of protein modification process;GO:000…
TCONS_00037035	325.343	1.35	5.35333	0.0133333	-8.64926	4.69992e-09	7.01991e-07	yes	CENPA	EAX00671.1 centromere protein A, 17kDa, isoform CRA_b [Homo sapiens]	-	-	-	-	GO:0005737//cytoplasm;GO:0031981//nuclear lumen;GO:0000775//chromosome, centromeric region;GO:0000776//kinetochore;GO:0005623//cell;GO:0044428//nuclear part;GO:0044444//cytoplasmic part;GO:0043234//protein complex;GO:0044427//chromosomal part;GO:0031974//membrane-enclosed lumen;GO:0044422//organelle part;GO:0032991//macromolecular complex;GO:0044446//intracellular organelle part;GO:0043232//intra…	GO:0003676//nucleic acid binding;GO:0005515//protein binding;GO:0046983//protein dimerization activity;GO:0097159//organic cyclic compound binding;GO:1901363//heterocyclic compound binding;GO:0005488//binding	GO:0044700//single organism signaling;GO:0016568//chromatin modification;GO:0033365//protein localization to organelle;GO:0065007//biological regulation;GO:0022403//cell cycle phase;GO:0070727//cellular macromolecule localization;GO:0043623//cellular protein complex assembly;GO:0007017//microtubule-based process;GO:0051656//establishment of organelle localization;GO:0051649//establishment of loca…
TCONS_00037513	1710.06	138.11	24.3167	1.25	-4.28195	3.03356e-07	2.54762e-05	yes	FNBP1	XP_017911468.1 PREDICTED: formin-binding protein 1 isoform X12 [Capra hircus]	-	-	-	-	-	GO:0005488//binding;GO:0005515//protein binding	-
TCONS_00037584	185.953	0	3	0.001	-11.5507	1.1242e-05	0.000585929	yes	Ralgds	XP_011973534.1 PREDICTED: ral guanine nucleotide dissociation stimulator isoform X6 [Ovis aries musimon]	Environmental Information Processing	Signal transduction	ko04014//Ras signaling pathway;ko04015//Rap1 signaling pathway;ko04072//Phospholipase D signaling pathway	K08732	GO:0005623//cell;GO:0044464//cell part	-	GO:0051336//regulation of hydrolase activity;GO:0050790//regulation of catalytic activity;GO:0050789//regulation of biological process;GO:0043087//regulation of GTPase activity;GO:0065009//regulation of molecular function;GO:0019222//regulation of metabolic process;GO:0065007//biological regulation
TCONS_00037808	0	110.37	0.001	1.35333	10.4023	0.000159416	0.00532304	yes	SLC34A3	XP_012016452.1 PREDICTED: sodium-dependent phosphate transport protein 2C isoform X2 [Ovis aries musimon]	-	-	-	-	GO:0071944//cell periphery;GO:0005903//brush border;GO:0016020//membrane;GO:0005623//cell;GO:0098862//cluster of actin-based cell projections;GO:0044464//cell part;GO:0005886//plasma membrane	GO:0015103//inorganic anion transmembrane transporter activity;GO:0005215//transporter activity;GO:0022892//substrate-specific transporter activity;GO:0008509//anion transmembrane transporter activity;GO:0022857//transmembrane transporter activity;GO:0015075//ion transmembrane transporter activity;GO:0022891//substrate-specific transmembrane transporter activity;GO:0015114//phosphate ion transmem…	GO:0044763//single-organism cellular process;GO:0019725//cellular homeostasis;GO:0006811//ion transport;GO:1902578//single-organism localization;GO:0098771//inorganic ion homeostasis;GO:0030002//cellular anion homeostasis;GO:0009987//cellular process;GO:0015672//monovalent inorganic cation transport;GO:0072505//divalent inorganic anion homeostasis;GO:0006812//cation transport;GO:0065008//regulati…
TCONS_00037915	176.23	0	2.00667	0.001	-10.9706	2.10125e-06	0.000139177	yes	GPR183	XP_011974714.1 PREDICTED: G-protein coupled receptor 183-A-like [Ovis aries musimon]	-	-	-	-	-	-	-
TCONS_00038085	1027.19	119.977	6.88	0.486667	-3.8214	0.00201308	0.0385717	yes	KLF12	XP_005687749.2 PREDICTED: Krueppel-like factor 12 [Capra hircus]	-	-	-	-	-	GO:1901363//heterocyclic compound binding;GO:0000976//transcription regulatory region sequence-specific DNA binding;GO:0003690//double-stranded DNA binding;GO:0005488//binding;GO:0044212//transcription regulatory region DNA binding;GO:0000981//RNA polymerase II transcription factor activity, sequence-specific DNA binding;GO:0003676//nucleic acid binding;GO:0000975//regulatory region DNA binding;G…	GO:0009889//regulation of biosynthetic process;GO:0065007//biological regulation;GO:0031323//regulation of cellular metabolic process;GO:1903506//regulation of nucleic acid-templated transcription;GO:2001141//regulation of RNA biosynthetic process;GO:0051252//regulation of RNA metabolic process;GO:0031326//regulation of cellular biosynthetic process;GO:0080090//regulation of primary metabolic pro…
TCONS_00038194	64.4333	0	1.7	0.001	-10.7313	0.00024941	0.00756215	yes	-	XP_012770936.1 hypothetical protein, conserved [Babesia bigemina]	-	-	-	-	-	-	-
TCONS_00038811	0	460.253	0.001	3.39	11.7271	8.27736e-11	2.18003e-08	yes	Spata13	XP_017912051.1 PREDICTED: spermatogenesis-associated protein 13 isoform X1 [Capra hircus]	-	-	-	-	-	-	GO:0065009//regulation of molecular function;GO:0050790//regulation of catalytic activity;GO:0043087//regulation of GTPase activity;GO:0050789//regulation of biological process;GO:0065007//biological regulation;GO:0019222//regulation of metabolic process;GO:0051336//regulation of hydrolase activity
TCONS_00038812	1172.86	65.5	12.92	0.49	-4.72068	0.000470906	0.0124392	yes	SPATA13	XP_017912051.1 PREDICTED: spermatogenesis-associated protein 13 isoform X1 [Capra hircus]	-	-	-	-	-	-	GO:0065009//regulation of molecular function;GO:0050790//regulation of catalytic activity;GO:0065007//biological regulation;GO:0019222//regulation of metabolic process;GO:0051336//regulation of hydrolase activity;GO:0050789//regulation of biological process;GO:0043087//regulation of GTPase activity
TCONS_00039002	114.673	0	1.43333	0.001	-10.4852	0.000879029	0.0204098	yes	FOXO1	XP_017912175.1 PREDICTED: forkhead box protein O1 [Capra hircus]	Environmental Information Processing;Organismal Systems	Endocrine system;Aging;Signal transduction	ko04910//Insulin signaling pathway;ko04068//FoxO signaling pathway;ko04152//AMPK signaling pathway;ko04919//Thyroid hormone signaling pathway;ko04211//Longevity regulating pathway - mammal;ko04922//Glucagon signaling pathway;ko04213//Longevity regulating pathway - multiple species	K07201	-	-	-
TCONS_00039065	486.773	117.573	5.83667	0.816667	-2.83733	0.000472471	0.0124731	yes	SETDB2	XP_005687517.2 PREDICTED: histone-lysine N-methyltransferase SETDB2 isoform X2 [Capra hircus]	Metabolism	Amino acid metabolism	ko00310//Lysine degradation	K18494	GO:0043232//intracellular non-membrane-bounded organelle;GO:0043231//intracellular membrane-bounded organelle;GO:0005623//cell;GO:0043227//membrane-bounded organelle;GO:0043226//organelle;GO:0043229//intracellular organelle;GO:0005622//intracellular;GO:0043228//non-membrane-bounded organelle;GO:0044464//cell part;GO:0044424//intracellular part	GO:0016741//transferase activity, transferring one-carbon groups;GO:0016740//transferase activity;GO:0043169//cation binding;GO:0016278//lysine N-methyltransferase activity;GO:0046872//metal ion binding;GO:0042054//histone methyltransferase activity;GO:0008168//methyltransferase activity;GO:0046914//transition metal ion binding;GO:0003824//catalytic activity;GO:0005488//binding;GO:0043167//ion bi…	GO:0043170//macromolecule metabolic process;GO:0018205//peptidyl-lysine modification;GO:0009987//cellular process;GO:1902589//single-organism organelle organization;GO:0044699//single-organism process;GO:0044260//cellular macromolecule metabolic process;GO:0051276//chromosome organization;GO:0008152//metabolic process;GO:0044763//single-organism cellular process;GO:0044267//cellular protein metab…
TCONS_00039102	51.0833	0	0.8	0.001	-9.64386	0.0004315	0.0116573	yes	COG3	XP_012017588.1 PREDICTED: conserved oligomeric Golgi complex subunit 3 isoform X3 [Ovis aries musimon]	-	-	-	-	-	-	-
TCONS_00039148	267.767	0	2.13667	0.001	-11.0611	6.66754e-11	1.81239e-08	yes	AKAP11	XP_017912277.1 PREDICTED: A-kinase anchor protein 11 isoform X2 [Capra hircus]	-	-	-	-	-	-	-
TCONS_00039154	79.6467	0	0.633333	0.001	-9.30682	0.00115394	0.0252516	yes	AKAP11	XP_017912277.1 PREDICTED: A-kinase anchor protein 11 isoform X2 [Capra hircus]	-	-	-	-	-	-	-
TCONS_00039166	93.6967	0	1.59333	0.001	-10.6378	0.000520598	0.0134329	yes	NAA16	XP_017912292.1 PREDICTED: N-alpha-acetyltransferase 16, NatA auxiliary subunit isoform X6 [Capra hircus]	-	-	-	-	GO:0031988//membrane-bounded vesicle;GO:0005622//intracellular;GO:0031248//protein acetyltransferase complex;GO:0043226//organelle;GO:0005623//cell;GO:0032991//macromolecular complex;GO:1902493//acetyltransferase complex;GO:0031414//N-terminal protein acetyltransferase complex;GO:0005737//cytoplasm;GO:1902494//catalytic complex;GO:0043227//membrane-bounded organelle;GO:0044464//cell part;GO:19902…	GO:0043021//ribonucleoprotein complex binding;GO:0044877//macromolecular complex binding;GO:0005488//binding;GO:0003824//catalytic activity	GO:0065008//regulation of biological quality;GO:0042981//regulation of apoptotic process;GO:0031647//regulation of protein stability;GO:0043067//regulation of programmed cell death;GO:0050789//regulation of biological process;GO:0010941//regulation of cell death;GO:0050794//regulation of cellular process;GO:0065007//biological regulation
TCONS_00039311	1175.39	138.427	20.1233	1.64333	-3.61417	5.74518e-05	0.0023396	yes	GATA3	NP_001070272.1 trans-acting T-cell-specific transcription factor GATA-3 [Bos taurus]	-	-	-	-	GO:0043227//membrane-bounded organelle;GO:0043232//intracellular non-membrane-bounded organelle;GO:0005694//chromosome;GO:0032991//macromolecular complex;GO:0044464//cell part;GO:0044424//intracellular part;GO:0005623//cell;GO:0044446//intracellular organelle part;GO:0043231//intracellular membrane-bounded organelle;GO:0043226//organelle;GO:0000785//chromatin;GO:0044422//organelle part;GO:0005622…	GO:0019904//protein domain specific binding;GO:0003676//nucleic acid binding;GO:0046872//metal ion binding;GO:0003712//transcription cofactor activity;GO:0097159//organic cyclic compound binding;GO:0003690//double-stranded DNA binding;GO:0005102//receptor binding;GO:0005515//protein binding;GO:0000977//RNA polymerase II regulatory region sequence-specific DNA binding;GO:0044212//transcription reg…	GO:1901615//organic hydroxy compound metabolic process;GO:0031399//regulation of protein modification process;GO:0034097//response to cytokine;GO:0042221//response to chemical;GO:0006355//regulation of transcription, DNA-templated;GO:0003205//cardiac chamber development;GO:0048015//phosphatidylinositol-mediated signaling;GO:0032268//regulation of cellular protein metabolic process;GO:0046631//alp…
TCONS_00039384	3062.01	196.987	8.71333	0.323333	-4.75213	9.38601e-10	1.83233e-07	yes	Pol	ELR50693.1 Spectrin beta chain, brain 2 [Bos mutus]	-	-	-	-	GO:0044464//cell part;GO:0043227//membrane-bounded organelle;GO:0043226//organelle;GO:0043231//intracellular membrane-bounded organelle;GO:0005623//cell;GO:0044424//intracellular part;GO:0016020//membrane;GO:0044425//membrane part;GO:0005622//intracellular;GO:0031224//intrinsic component of membrane;GO:0043229//intracellular organelle	GO:0005488//binding	GO:0015980//energy derivation by oxidation of organic compounds;GO:0044699//single-organism process;GO:0050896//response to stimulus;GO:0006091//generation of precursor metabolites and energy;GO:0023052//signaling;GO:0044237//cellular metabolic process;GO:0044700//single organism signaling;GO:0050789//regulation of biological process;GO:0055114//oxidation-reduction process;GO:0009987//cellular pr…
TCONS_00039543	375.833	78.1033	2.56	0.306667	-3.0614	0.000498358	0.0130099	yes	MCM10	XP_013823967.2 PREDICTED: protein MCM10 homolog [Capra hircus]	-	-	-	-	GO:0005622//intracellular;GO:0043228//non-membrane-bounded organelle;GO:0043226//organelle;GO:0043229//intracellular organelle;GO:0044424//intracellular part;GO:0043232//intracellular non-membrane-bounded organelle;GO:0044464//cell part;GO:0005623//cell;GO:0043227//membrane-bounded organelle;GO:0043231//intracellular membrane-bounded organelle	GO:0005515//protein binding;GO:0005488//binding	GO:0008152//metabolic process;GO:0034641//cellular nitrogen compound metabolic process;GO:0090304//nucleic acid metabolic process;GO:0006725//cellular aromatic compound metabolic process;GO:0044699//single-organism process;GO:0043170//macromolecule metabolic process;GO:0071704//organic substance metabolic process;GO:0046483//heterocycle metabolic process;GO:0009987//cellular process;GO:0044237//c…
TCONS_00040310	401.103	54.71	10.2433	0.806667	-3.66657	4.67292e-05	0.00195114	yes	TPX2	XP_005688420.2 PREDICTED: targeting protein for Xklp2 isoform X3 [Capra hircus]	-	-	-	-	GO:0030424//axon;GO:0043228//non-membrane-bounded organelle;GO:0043232//intracellular non-membrane-bounded organelle;GO:0043229//intracellular organelle;GO:0044464//cell part;GO:0005622//intracellular;GO:0033267//axon part;GO:0005856//cytoskeleton;GO:0042995//cell projection;GO:0043227//membrane-bounded organelle;GO:0005623//cell;GO:0097458//neuron part;GO:0044424//intracellular part;GO:0043005//…	GO:0019899//enzyme binding;GO:0019900//kinase binding;GO:0005515//protein binding;GO:0005488//binding	GO:0044699//single-organism process;GO:0019222//regulation of metabolic process;GO:0000278//mitotic cell cycle;GO:0019220//regulation of phosphate metabolic process;GO:0008219//cell death;GO:0051246//regulation of protein metabolic process;GO:0051174//regulation of phosphorus metabolic process;GO:0007010//cytoskeleton organization;GO:0065007//biological regulation;GO:0016043//cellular component o…
TCONS_00040328	226.26	23.49	12.3533	0.69	-4.16216	0.000622934	0.0155856	yes	HCK	NP_001103664.1 tyrosine-protein kinase HCK isoform 1 [Bos taurus]	Organismal Systems	Immune system	ko04062//Chemokine signaling pathway;ko04666//Fc gamma R-mediated phagocytosis	K08893	-	GO:0032550//purine ribonucleoside binding;GO:0097367//carbohydrate derivative binding;GO:0004713//protein tyrosine kinase activity;GO:0016773//phosphotransferase activity, alcohol group as acceptor;GO:0036094//small molecule binding;GO:0005488//binding;GO:0001882//nucleoside binding;GO:0032549//ribonucleoside binding;GO:0016772//transferase activity, transferring phosphorus-containing groups;GO:0…	GO:0071840//cellular component organization or biogenesis;GO:0009987//cellular process;GO:0043412//macromolecule modification;GO:0050896//response to stimulus;GO:0051179//localization;GO:0006793//phosphorus metabolic process;GO:0051707//response to other organism;GO:0050789//regulation of biological process;GO:0008152//metabolic process;GO:0009607//response to biotic stimulus;GO:0019538//protein …
TCONS_00040349	2211.35	298.783	21.29	1.95333	-3.44617	1.89076e-05	0.000912772	yes	Asx	XP_017913188.1 PREDICTED: putative Polycomb group protein ASXL1 isoform X2 [Capra hircus]	-	-	-	-	GO:0044446//intracellular organelle part;GO:0043232//intracellular non-membrane-bounded organelle;GO:0044422//organelle part;GO:0031982//vesicle;GO:0043234//protein complex;GO:0043229//intracellular organelle;GO:0044427//chromosomal part;GO:0000785//chromatin;GO:0005623//cell;GO:0043228//non-membrane-bounded organelle;GO:0031519//PcG protein complex;GO:0005694//chromosome;GO:0043227//membrane-bou…	GO:0005102//receptor binding;GO:0003676//nucleic acid binding;GO:0000988//transcription factor activity, protein binding;GO:0005488//binding;GO:0008134//transcription factor binding;GO:0097159//organic cyclic compound binding;GO:0000989//transcription factor activity, transcription factor binding;GO:0003712//transcription cofactor activity;GO:0005515//protein binding;GO:1901363//heterocyclic comp…	GO:0044699//single-organism process;GO:0010556//regulation of macromolecule biosynthetic process;GO:0006508//proteolysis;GO:0010648//negative regulation of cell communication;GO:0051093//negative regulation of developmental process;GO:0048731//system development;GO:0048856//anatomical structure development;GO:0019222//regulation of metabolic process;GO:0016570//histone modification;GO:0051276//ch…
TCONS_00040407	2.69667	1335.45	0.06	22.48	8.54946	5.59801e-06	0.000321506	yes	-	XP_013824342.2 PREDICTED: vomeromodulin-like isoform X2 [Capra hircus]	-	-	-	-	-	-	-
TCONS_00040579	50.4033	0	3.16	0.001	-11.6257	0.00107425	0.0239513	yes	Pol	BAA25253.1 unnamed protein product [Canis lupus familiaris]	-	-	-	-	-	-	-
TCONS_00040624	122.71	0	1.5	0.001	-10.5507	2.17901e-06	0.000143075	yes	PLCG1	XP_017913357.1 PREDICTED: 1-phosphatidylinositol 4,5-bisphosphate phosphodiesterase gamma-1 isoform X1 [Capra hircus]	Organismal Systems;Environmental Information Processing;Metabolism	Immune system;Endocrine system;Signal transduction;Carbohydrate metabolism;Global and Overview;Sensory system;Nervous system	ko01100//Metabolic pathways;ko04014//Ras signaling pathway;ko04015//Rap1 signaling pathway;ko04020//Calcium signaling pathway;ko04650//Natural killer cell mediated cytotoxicity;ko04072//Phospholipase D signaling pathway;ko04722//Neurotrophin signaling pathway;ko04919//Thyroid hormone signaling pathway;ko04670//Leukocyte transendothelial migration;ko04660//T cell receptor signaling pathway;ko04750…	K01116	GO:0005622//intracellular;GO:0030054//cell junction;GO:0044444//cytoplasmic part;GO:0044464//cell part;GO:0005737//cytoplasm;GO:0031252//cell leading edge;GO:0043234//protein complex;GO:0016020//membrane;GO:0032991//macromolecular complex;GO:0005623//cell;GO:0044424//intracellular part	GO:0016787//hydrolase activity;GO:0042578//phosphoric ester hydrolase activity;GO:0005167//neurotrophin TRK receptor binding;GO:0060089//molecular transducer activity;GO:0016788//hydrolase activity, acting on ester bonds;GO:0004620//phospholipase activity;GO:0016298//lipase activity;GO:0043169//cation binding;GO:0019899//enzyme binding;GO:0005488//binding;GO:0046872//metal ion binding;GO:0005126/…	GO:0006629//lipid metabolic process;GO:1903651//positive regulation of cytoplasmic transport;GO:0051270//regulation of cellular component movement;GO:0010632//regulation of epithelial cell migration;GO:0050794//regulation of cellular process;GO:0022603//regulation of anatomical structure morphogenesis;GO:0060341//regulation of cellular localization;GO:0010595//positive regulation of endothelial c…
TCONS_00040654	338.703	19.9567	8.11	0.306667	-4.72496	4.13915e-05	0.00176638	yes	MYBL2	XP_017913382.1 PREDICTED: myb-related protein B [Capra hircus]	-	-	-	-	GO:0005623//cell;GO:0043227//membrane-bounded organelle;GO:0043226//organelle;GO:0032991//macromolecular complex;GO:0044424//intracellular part;GO:0043229//intracellular organelle;GO:0043234//protein complex;GO:0005622//intracellular;GO:0043231//intracellular membrane-bounded organelle;GO:0044464//cell part	GO:0001071//nucleic acid binding transcription factor activity;GO:0000982//transcription factor activity, RNA polymerase II core promoter proximal region sequence-specific binding;GO:0003700//transcription factor activity, sequence-specific DNA binding;GO:0000981//RNA polymerase II transcription factor activity, sequence-specific DNA binding;GO:0097159//organic cyclic compound binding;GO:1901363/…	GO:0044763//single-organism cellular process;GO:0031323//regulation of cellular metabolic process;GO:0065007//biological regulation;GO:0043933//macromolecular complex subunit organization;GO:0080090//regulation of primary metabolic process;GO:0060255//regulation of macromolecule metabolic process;GO:0019219//regulation of nucleobase-containing compound metabolic process;GO:0000226//microtubule cy…
TCONS_00040707	240.993	3.36	21.5767	0.15	-7.16837	2.99528e-05	0.0013399	yes	-	XP_005688658.1 PREDICTED: spleen trypsin inhibitor I [Capra hircus]	-	-	-	-	-	-	GO:0009892//negative regulation of metabolic process;GO:0010466//negative regulation of peptidase activity;GO:0048519//negative regulation of biological process;GO:0050794//regulation of cellular process;GO:0045861//negative regulation of proteolysis;GO:0065007//biological regulation;GO:0065009//regulation of molecular function;GO:0031324//negative regulation of cellular metabolic process;GO:0052…
TCONS_00040878	228.947	6.61	3.42667	0.0633333	-5.7577	1.96909e-05	0.000938964	yes	PRKCQ	XP_004014222.1 PREDICTED: protein kinase C theta type isoform X1 [Ovis aries]	Organismal Systems;Environmental Information Processing;Cellular Processes	Cellular commiunity;Circulatory system;Endocrine system;Immune system;Signal transduction;Sensory system	ko04530//Tight junction;ko04270//Vascular smooth muscle contraction;ko04660//T cell receptor signaling pathway;ko04750//Inflammatory mediator regulation of TRP channels;ko04064//NF-kappa B signaling pathway;ko04920//Adipocytokine signaling pathway	K18052	GO:0005886//plasma membrane;GO:0044444//cytoplasmic part;GO:0044424//intracellular part;GO:0005622//intracellular;GO:0005737//cytoplasm;GO:0005623//cell;GO:0071944//cell periphery;GO:0044425//membrane part;GO:0016020//membrane;GO:0044459//plasma membrane part;GO:0044464//cell part	GO:0016773//phosphotransferase activity, alcohol group as acceptor;GO:1901363//heterocyclic compound binding;GO:0032550//purine ribonucleoside binding;GO:0043167//ion binding;GO:0036094//small molecule binding;GO:0001882//nucleoside binding;GO:0016740//transferase activity;GO:0005488//binding;GO:0016301//kinase activity;GO:0032549//ribonucleoside binding;GO:0097367//carbohydrate derivative bindin…	GO:0060255//regulation of macromolecule metabolic process;GO:0044267//cellular protein metabolic process;GO:1903037//regulation of leukocyte cell-cell adhesion;GO:0031325//positive regulation of cellular metabolic process;GO:0034110//regulation of homotypic cell-cell adhesion;GO:0006793//phosphorus metabolic process;GO:0007602//phototransduction;GO:0032502//developmental process;GO:0070486//leuko…
TCONS_00040879	608.507	6.78	12.1167	0.0933333	-7.02038	3.53922e-09	5.56645e-07	yes	PRKCQ	XP_004014222.1 PREDICTED: protein kinase C theta type isoform X1 [Ovis aries]	Cellular Processes;Environmental Information Processing;Organismal Systems	Immune system;Endocrine system;Cellular commiunity;Circulatory system;Sensory system;Signal transduction	ko04530//Tight junction;ko04270//Vascular smooth muscle contraction;ko04660//T cell receptor signaling pathway;ko04750//Inflammatory mediator regulation of TRP channels;ko04064//NF-kappa B signaling pathway;ko04920//Adipocytokine signaling pathway	K18052	GO:0005623//cell;GO:0071944//cell periphery;GO:0044459//plasma membrane part;GO:0044424//intracellular part;GO:0005737//cytoplasm;GO:0016020//membrane;GO:0005622//intracellular;GO:0044444//cytoplasmic part;GO:0044425//membrane part;GO:0005886//plasma membrane;GO:0044464//cell part	GO:0097367//carbohydrate derivative binding;GO:0016772//transferase activity, transferring phosphorus-containing groups;GO:0016301//kinase activity;GO:0043169//cation binding;GO:0032549//ribonucleoside binding;GO:0016740//transferase activity;GO:0019787//ubiquitin-like protein transferase activity;GO:0005488//binding;GO:0016773//phosphotransferase activity, alcohol group as acceptor;GO:0004674//p…	GO:0007602//phototransduction;GO:0032663//regulation of interleukin-2 production;GO:1903037//regulation of leukocyte cell-cell adhesion;GO:0009893//positive regulation of metabolic process;GO:0002682//regulation of immune system process;GO:0060548//negative regulation of cell death;GO:0007166//cell surface receptor signaling pathway;GO:0048812//neuron projection morphogenesis;GO:0044237//cellular…
TCONS_00040974	58.3367	0	0.923333	0.001	-9.85071	0.000508266	0.0132066	yes	APBB1IP	XP_017912531.1 PREDICTED: amyloid beta A4 precursor protein-binding family B member 1-interacting protein [Capra hircus]	Organismal Systems;Environmental Information Processing	Immune system;Signal transduction	ko04015//Rap1 signaling pathway;ko04611//Platelet activation	K17704	-	-	-
TCONS_00040977	3430.3	40.3933	55.45	0.426667	-7.02193	6.26592e-15	4.89291e-12	yes	APBB1IP	XP_017912531.1 PREDICTED: amyloid beta A4 precursor protein-binding family B member 1-interacting protein [Capra hircus]	Environmental Information Processing;Organismal Systems	Immune system;Signal transduction	ko04015//Rap1 signaling pathway;ko04611//Platelet activation	K17704	-	-	-
TCONS_00041054	165.27	0	1.66	0.001	-10.697	4.56111e-06	0.000267125	yes	ARHGAP21	XP_017912595.1 PREDICTED: rho GTPase-activating protein 21 isoform X2 [Capra hircus]	-	-	-	-	-	-	-
TCONS_00041381	245.947	0	3.54333	0.001	-11.7909	1.4017e-08	1.78767e-06	yes	RASSF2	XP_004014386.1 PREDICTED: ras association domain-containing protein 2 [Ovis aries]	-	-	-	-	GO:0043226//organelle;GO:0043229//intracellular organelle;GO:0043227//membrane-bounded organelle;GO:0005622//intracellular;GO:0044464//cell part;GO:0043231//intracellular membrane-bounded organelle;GO:0005623//cell;GO:0044424//intracellular part	-	GO:0044699//single-organism process;GO:0007165//signal transduction;GO:0051239//regulation of multicellular organismal process;GO:0065008//regulation of biological quality;GO:1903706//regulation of hemopoiesis;GO:0048583//regulation of response to stimulus;GO:0002761//regulation of myeloid leukocyte differentiation;GO:0050793//regulation of developmental process;GO:0023051//regulation of signalin…
TCONS_00041384	435.043	87.9167	5.69667	0.66	-3.10958	0.000633347	0.015784	yes	RASSF2	XP_004014386.1 PREDICTED: ras association domain-containing protein 2 [Ovis aries]	-	-	-	-	GO:0043227//membrane-bounded organelle;GO:0005623//cell;GO:0005622//intracellular;GO:0044464//cell part;GO:0043226//organelle;GO:0043229//intracellular organelle;GO:0043231//intracellular membrane-bounded organelle;GO:0044424//intracellular part	-	GO:0045637//regulation of myeloid cell differentiation;GO:1901222//regulation of NIK/NF-kappaB signaling;GO:0010646//regulation of cell communication;GO:0007167//enzyme linked receptor protein signaling pathway;GO:1902105//regulation of leukocyte differentiation;GO:0044699//single-organism process;GO:0009966//regulation of signal transduction;GO:0009987//cellular process;GO:0038167//epidermal gro…
TCONS_00041563	264.4	2.27333	7.08	0.0433333	-7.35213	1.16202e-06	8.42371e-05	yes	Lime1	XP_017913002.1 PREDICTED: lck-interacting transmembrane adapter 1 isoform X2 [Capra hircus]	-	-	-	-	-	-	-
TCONS_00041564	256.223	16.0467	7.91667	0.323333	-4.6138	0.000182388	0.00588695	yes	Lime1	XP_017913001.1 PREDICTED: lck-interacting transmembrane adapter 1 isoform X1 [Capra hircus]	-	-	-	-	-	-	-
TCONS_00041805	67.0467	0	1.74667	0.001	-10.7704	0.00198974	0.0382727	yes	FOXS1	XP_017913175.1 PREDICTED: forkhead box protein S1 [Capra hircus]	-	-	-	-	-	-	-
TCONS_00041827	619.463	2.10418e+06	46.8333	94222.8	10.9743	7.37482e-22	5.14513e-18	yes	SPLUNC2B	XP_017912356.1 PREDICTED: short palate, lung and nasal epithelium carcinoma-associated protein 2B-like [Capra hircus]	-	-	-	-	-	-	-
TCONS_00042178	138.237	0	1.57	0.001	-10.6165	0.00025976	0.00779105	yes	NFATC2	XP_011985040.1 PREDICTED: nuclear factor of activated T-cells, cytoplasmic 2 isoform X3 [Ovis aries musimon]	Environmental Information Processing;Organismal Systems	Signal transduction;Development;Endocrine system;Immune system	ko04650//Natural killer cell mediated cytotoxicity;ko04921//Oxytocin signaling pathway;ko04022//cGMP - PKG signaling pathway;ko04310//Wnt signaling pathway;ko04360//Axon guidance;ko04380//Osteoclast differentiation;ko04660//T cell receptor signaling pathway;ko04662//B cell receptor signaling pathway;ko04370//VEGF signaling pathway	K17332	GO:0043232//intracellular non-membrane-bounded organelle;GO:0016020//membrane;GO:0005667//transcription factor complex;GO:0005623//cell;GO:0005622//intracellular;GO:0044444//cytoplasmic part;GO:0032991//macromolecular complex;GO:0043227//membrane-bounded organelle;GO:0043234//protein complex;GO:0005737//cytoplasm;GO:0043228//non-membrane-bounded organelle;GO:0044464//cell part;GO:0005856//cytoske…	GO:0097159//organic cyclic compound binding;GO:0000975//regulatory region DNA binding;GO:0043565//sequence-specific DNA binding;GO:0001012//RNA polymerase II regulatory region DNA binding;GO:0003690//double-stranded DNA binding;GO:0003677//DNA binding;GO:0003700//transcription factor activity, sequence-specific DNA binding;GO:0005488//binding;GO:0044212//transcription regulatory region DNA bindin…	GO:0010556//regulation of macromolecule biosynthetic process;GO:0050851//antigen receptor-mediated signaling pathway;GO:0002376//immune system process;GO:0042221//response to chemical;GO:0007165//signal transduction;GO:0002684//positive regulation of immune system process;GO:1903506//regulation of nucleic acid-templated transcription;GO:0033554//cellular response to stress;GO:0044707//single-mult…
TCONS_00042448	83.6267	0.0933333	2.68	0.001	-11.388	0.000695298	0.0169763	yes	PLEKHF2	XP_004011876.1 PREDICTED: pleckstrin homology domain-containing family F member 2 [Ovis aries]	-	-	-	-	-	GO:0043169//cation binding;GO:0005488//binding;GO:0043167//ion binding	-
TCONS_00042617	1335.23	485.233	8.93667	1.88	-2.249	0.000766051	0.018312	yes	PAG1	XP_005689183.2 PREDICTED: phosphoprotein associated with glycosphingolipid-enriched microdomains 1 [Capra hircus]	-	-	-	-	GO:0098805//whole membrane;GO:0098589//membrane region;GO:0044425//membrane part;GO:0016020//membrane	GO:0005515//protein binding;GO:0005488//binding;GO:0019904//protein domain specific binding	GO:0022408//negative regulation of cell-cell adhesion;GO:0044700//single organism signaling;GO:0034111//negative regulation of homotypic cell-cell adhesion;GO:0034110//regulation of homotypic cell-cell adhesion;GO:0050789//regulation of biological process;GO:0051716//cellular response to stimulus;GO:0048523//negative regulation of cellular process;GO:0050896//response to stimulus;GO:0007162//nega…
TCONS_00042732	192.607	1.38	1.52667	0.00666667	-7.8392	1.77655e-07	1.60611e-05	yes	-	XP_011981301.1 PREDICTED: AP-3 complex subunit mu-2 isoform X2 [Ovis aries musimon]	Genetic Information Processing	Replication and repair	ko03420//Nucleotide excision repair	K10838	GO:0005623//cell;GO:0005737//cytoplasm;GO:0044424//intracellular part;GO:0005622//intracellular;GO:0044444//cytoplasmic part;GO:0044464//cell part	GO:0016647//oxidoreductase activity, acting on the CH-NH group of donors, oxygen as acceptor;GO:0016491//oxidoreductase activity;GO:0016645//oxidoreductase activity, acting on the CH-NH group of donors;GO:0003824//catalytic activity;GO:0005488//binding	GO:0044106//cellular amine metabolic process;GO:0044237//cellular metabolic process;GO:0051649//establishment of localization in cell;GO:0009058//biosynthetic process;GO:0006807//nitrogen compound metabolic process;GO:0008152//metabolic process;GO:0009987//cellular process;GO:0034641//cellular nitrogen compound metabolic process;GO:0006576//cellular biogenic amine metabolic process;GO:0071704//or…
TCONS_00042887	46.4967	0	2.2	0.001	-11.1033	0.0026213	0.0473131	yes	CFC1	XP_006066002.1 PREDICTED: cryptic protein-like [Bubalus bubalis]	-	-	-	-	-	-	GO:0065007//biological regulation;GO:0044763//single-organism cellular process;GO:0032502//developmental process;GO:0044707//single-multicellular organism process;GO:0048513//animal organ development;GO:0072358//cardiovascular system development;GO:0050794//regulation of cellular process;GO:0009887//organ morphogenesis;GO:0044700//single organism signaling;GO:0072359//circulatory system developme…
TCONS_00043268	79.0733	0	0.7	0.001	-9.45121	5.23677e-05	0.00215424	yes	OGFRL1	XP_017914317.1 PREDICTED: opioid growth factor receptor-like protein 1 isoform X1 [Capra hircus]	-	-	-	-	-	-	-
TCONS_00043270	159.92	0	1.78667	0.001	-10.8031	0.00158151	0.0321723	yes	OGFRL1	XP_017914318.1 PREDICTED: opioid growth factor receptor-like protein 1 isoform X2 [Capra hircus]	-	-	-	-	-	-	-
TCONS_00043684	106.07	0	2.39333	0.001	-11.2248	0.000469994	0.0124298	yes	RAD21	ELR55302.1 Double-strand-break repair protein rad21-like protein, partial [Bos mutus]	Cellular Processes	Cell growth and death	ko04110//Cell cycle	K06670	GO:0044422//organelle part;GO:0031981//nuclear lumen;GO:0043226//organelle;GO:0043234//protein complex;GO:0070013//intracellular organelle lumen;GO:0005694//chromosome;GO:0044446//intracellular organelle part;GO:0044428//nuclear part;GO:0043232//intracellular non-membrane-bounded organelle;GO:0043233//organelle lumen;GO:0043228//non-membrane-bounded organelle;GO:0000798//nuclear cohesin complex;G…	-	GO:0046483//heterocycle metabolic process;GO:0008152//metabolic process;GO:0050896//response to stimulus;GO:0033036//macromolecule localization;GO:0009987//cellular process;GO:0008219//cell death;GO:0033365//protein localization to organelle;GO:0044238//primary metabolic process;GO:0051171//regulation of nitrogen compound metabolic process;GO:0012501//programmed cell death;GO:0031326//regulation …
TCONS_00044023	386.767	61.9367	25.02	2.28333	-3.45387	0.000406292	0.011163	yes	FAM49B	KYO45186.1 hypothetical protein Y1Q_0014652 [Alligator mississippiensis]	-	-	-	-	GO:0031988//membrane-bounded vesicle;GO:0005623//cell;GO:0044464//cell part;GO:0031982//vesicle;GO:0043227//membrane-bounded organelle;GO:0042995//cell projection;GO:0043226//organelle	-	-
TCONS_00044042	561.9	0	11.6733	0.001	-13.5109	2.24517e-15	1.95946e-12	yes	SLA	XP_013824590.1 PREDICTED: src-like-adapter isoform X2 [Capra hircus]	-	-	-	-	-	-	-
TCONS_00044185	0	86.1333	0.001	0.603333	9.23681	0.000416462	0.0113862	yes	OPLAH	XP_017914189.1 PREDICTED: 5-oxoprolinase isoform X1 [Capra hircus]	Metabolism	Metabolism of other amino acids	ko00480//Glutathione metabolism	K01469	GO:0005737//cytoplasm;GO:0044424//intracellular part;GO:0044444//cytoplasmic part;GO:0005622//intracellular;GO:0044464//cell part;GO:0005623//cell	GO:0005488//binding;GO:0032550//purine ribonucleoside binding;GO:0016812//hydrolase activity, acting on carbon-nitrogen (but not peptide) bonds, in cyclic amides;GO:0001883//purine nucleoside binding;GO:0016810//hydrolase activity, acting on carbon-nitrogen (but not peptide) bonds;GO:0032549//ribonucleoside binding;GO:0003824//catalytic activity;GO:0097367//carbohydrate derivative binding;GO:0036…	GO:0006518//peptide metabolic process;GO:0006749//glutathione metabolic process;GO:0034641//cellular nitrogen compound metabolic process;GO:0071704//organic substance metabolic process;GO:0044272//sulfur compound biosynthetic process;GO:0044249//cellular biosynthetic process;GO:0044237//cellular metabolic process;GO:0044699//single-organism process;GO:0009058//biosynthetic process;GO:0006790//sul…
TCONS_00044264	88.9267	0	1.16667	0.001	-10.1882	0.000991138	0.0226002	yes	NCAPD3	XP_017914496.1 PREDICTED: condensin-2 complex subunit D3 isoform X2 [Capra hircus]	-	-	-	-	GO:0044422//organelle part;GO:0044464//cell part;GO:0044446//intracellular organelle part;GO:0043227//membrane-bounded organelle;GO:0032991//macromolecular complex;GO:0043233//organelle lumen;GO:0005622//intracellular;GO:0031981//nuclear lumen;GO:0044427//chromosomal part;GO:0043226//organelle;GO:0044424//intracellular part;GO:0070013//intracellular organelle lumen;GO:0001674//female germ cell nu…	GO:0005515//protein binding;GO:0005488//binding;GO:0042393//histone binding	GO:0044763//single-organism cellular process;GO:0022402//cell cycle process;GO:0009987//cellular process;GO:0007049//cell cycle;GO:0044699//single-organism process
TCONS_00044367	234.44	0	17.7967	0.001	-14.1193	2.93951e-06	0.000183246	yes	Prg3	XP_017914430.1 PREDICTED: proteoglycan 3-like [Capra hircus]	-	-	-	-	-	-	-
TCONS_00044368	2013.19	0	192.233	0.001	-17.5525	1.05834e-10	2.67652e-08	yes	Prg3	XP_017914430.1 PREDICTED: proteoglycan 3-like [Capra hircus]	-	-	-	-	-	-	-
TCONS_00044370	527.447	0	53.02	0.001	-15.6942	3.60734e-08	4.05461e-06	yes	Prg3	XP_005957603.1 PREDICTED: proteoglycan 3-like [Pantholops hodgsonii]	-	-	-	-	-	-	-
TCONS_00044445	82.6433	0	1.29	0.001	-10.3332	0.00111228	0.0245696	yes	CELF1	XP_006057437.1 PREDICTED: CUGBP Elav-like family member 1 isoform X7 [Bubalus bubalis]	-	-	-	-	-	-	-
TCONS_00044666	2654.58	1.78333	40.3333	0.0166667	-11.2408	4.87764e-20	2.15007e-16	yes	RAG2	XP_005690152.1 PREDICTED: V(D)J recombination-activating protein 2 [Capra hircus]	Environmental Information Processing	Signal transduction	ko04068//FoxO signaling pathway	K10988	GO:0043227//membrane-bounded organelle;GO:0043229//intracellular organelle;GO:0043231//intracellular membrane-bounded organelle;GO:0043226//organelle;GO:0044464//cell part;GO:0044424//intracellular part;GO:0005622//intracellular;GO:0005623//cell	GO:1902936//phosphatidylinositol bisphosphate binding;GO:0016787//hydrolase activity;GO:0016788//hydrolase activity, acting on ester bonds;GO:0004518//nuclease activity;GO:1901363//heterocyclic compound binding;GO:0005543//phospholipid binding;GO:0043168//anion binding;GO:1901981//phosphatidylinositol phosphate binding;GO:0005488//binding;GO:0046872//metal ion binding;GO:0035091//phosphatidylinos…	GO:0032501//multicellular organismal process;GO:0007159//leukocyte cell-cell adhesion;GO:0034109//homotypic cell-cell adhesion;GO:0048731//system development;GO:0044260//cellular macromolecule metabolic process;GO:0043170//macromolecule metabolic process;GO:1901360//organic cyclic compound metabolic process;GO:0071704//organic substance metabolic process;GO:0002521//leukocyte differentiation;GO:0…
TCONS_00044845	556.46	146.897	5.42333	0.873333	-2.63458	0.00107137	0.0239031	yes	C2CD3	XP_005690022.2 PREDICTED: C2 domain-containing protein 3 isoform X1 [Capra hircus]	-	-	-	-	GO:0043228//non-membrane-bounded organelle;GO:0005622//intracellular;GO:0015630//microtubule cytoskeleton;GO:0044430//cytoskeletal part;GO:0005815//microtubule organizing center;GO:0005737//cytoplasm;GO:0044424//intracellular part;GO:0005856//cytoskeleton;GO:0043226//organelle;GO:0043232//intracellular non-membrane-bounded organelle;GO:0044444//cytoplasmic part;GO:0044422//organelle part;GO:00056…	-	GO:0030030//cell projection organization;GO:0032502//developmental process;GO:0009880//embryonic pattern specification;GO:0048646//anatomical structure formation involved in morphogenesis;GO:0030031//cell projection assembly;GO:0050794//regulation of cellular process;GO:0048736//appendage development;GO:0003007//heart morphogenesis;GO:0044380//protein localization to cytoskeleton;GO:0060562//epit…
TCONS_00045006	557.74	80.1133	8.31667	0.653333	-3.67011	1.5957e-05	0.000790917	yes	TRIM5	XP_013832381.2 PREDICTED: tripartite motif-containing protein 5 isoform X1 [Capra hircus]	-	-	-	-	-	-	-
TCONS_00045011	43.9867	0.356667	0.813333	0.00333333	-7.93074	0.00209191	0.0398422	yes	TRIM5	ELR58989.1 Tripartite motif-containing protein 5, partial [Bos mutus]	-	-	-	-	-	-	-
TCONS_00045012	55.5067	1.46	0.676667	0.01	-6.08037	0.00261365	0.0472324	yes	TRIM5	XP_015330212.1 PREDICTED: LOW QUALITY PROTEIN: tripartite motif-containing protein 5-like [Bos taurus]	-	-	-	-	-	-	-
TCONS_00045402	77.5633	979.823	7.84333	52.9467	2.755	0.00200239	0.0384498	yes	CRYAB	XP_010984284.1 PREDICTED: alpha-crystallin B chain [Camelus dromedarius]	Genetic Information Processing;Organismal Systems	Aging;Folding, sorting and degradation	ko04141//Protein processing in endoplasmic reticulum;ko04213//Longevity regulating pathway - multiple species	K09542	GO:0030017//sarcomere;GO:0044422//organelle part;GO:0044424//intracellular part;GO:0031988//membrane-bounded vesicle;GO:0005623//cell;GO:0043292//contractile fiber;GO:0043228//non-membrane-bounded organelle;GO:0044464//cell part;GO:0031982//vesicle;GO:0043227//membrane-bounded organelle;GO:0044446//intracellular organelle part;GO:0043232//intracellular non-membrane-bounded organelle;GO:0005622//i…	GO:0043167//ion binding;GO:0046983//protein dimerization activity;GO:0043169//cation binding;GO:0008092//cytoskeletal protein binding;GO:0005198//structural molecule activity;GO:0015631//tubulin binding;GO:0005488//binding;GO:0005515//protein binding	GO:0032879//regulation of localization;GO:0060548//negative regulation of cell death;GO:0044700//single organism signaling;GO:0034622//cellular macromolecular complex assembly;GO:0007275//multicellular organism development;GO:0006979//response to oxidative stress;GO:0006793//phosphorus metabolic process;GO:0006996//organelle organization;GO:0000165//MAPK cascade;GO:0050794//regulation of cellular…
TCONS_00045457	125.19	0.00333333	1.8	0.001	-10.8138	0.000199915	0.00633325	yes	NPAT	XP_017915327.1 PREDICTED: protein NPAT isoform X2 [Capra hircus]	-	-	-	-	-	-	-
TCONS_00045466	32.19	0	1.14	0.001	-10.1548	0.00266785	0.0479044	yes	SLC35F2	XP_004016045.1 PREDICTED: solute carrier family 35 member F2 isoform X1 [Ovis aries]	-	-	-	-	GO:0016020//membrane;GO:0031224//intrinsic component of membrane;GO:0044425//membrane part	-	-
TCONS_00045535	435.997	0	6.67333	0.001	-12.7042	3.3574e-14	2.13482e-11	yes	BIRC2	XP_017915383.1 PREDICTED: baculoviral IAP repeat-containing protein 2 isoform X1 [Capra hircus]	Organismal Systems;Genetic Information Processing;Cellular Processes;Environmental Information Processing	Signal transduction;Folding, sorting and degradation;Cell growth and death;Cellular commiunity;Immune system	ko04510//Focal adhesion;ko04120//Ubiquitin mediated proteolysis;ko04064//NF-kappa B signaling pathway;ko04668//TNF signaling pathway;ko04210//Apoptosis;ko04621//NOD-like receptor signaling pathway	K16060	GO:0043229//intracellular organelle;GO:0043235//receptor complex;GO:0016020//membrane;GO:0044424//intracellular part;GO:0005886//plasma membrane;GO:0005623//cell;GO:0043231//intracellular membrane-bounded organelle;GO:0043226//organelle;GO:0032991//macromolecular complex;GO:0043234//protein complex;GO:0005622//intracellular;GO:0044464//cell part;GO:0071944//cell periphery;GO:0043227//membrane-bou…	GO:0003712//transcription cofactor activity;GO:0000989//transcription factor activity, transcription factor binding;GO:0016740//transferase activity;GO:0003824//catalytic activity;GO:0046914//transition metal ion binding;GO:0000988//transcription factor activity, protein binding;GO:0043169//cation binding;GO:0005488//binding;GO:0019787//ubiquitin-like protein transferase activity;GO:0043167//ion …	GO:0000003//reproduction;GO:0043170//macromolecule metabolic process;GO:0060255//regulation of macromolecule metabolic process;GO:0051171//regulation of nitrogen compound metabolic process;GO:0031399//regulation of protein modification process;GO:0080090//regulation of primary metabolic process;GO:0031398//positive regulation of protein ubiquitination;GO:1902914//regulation of protein polyubiquit…
TCONS_00045589	142.933	0	6.63	0.001	-12.6948	0.00013993	0.00480207	yes	MS4A3	XP_013825430.2 PREDICTED: membrane-spanning 4-domains subfamily A member 3 [Capra hircus]	-	-	-	-	-	-	-
TCONS_00045880	899.837	63.2067	8.67	0.42	-4.36757	6.39798e-06	0.00036093	yes	SLC35C1	XP_011951696.1 PREDICTED: GDP-fucose transporter 1 isoform X2 [Ovis aries]	-	-	-	-	GO:0044425//membrane part;GO:0043231//intracellular membrane-bounded organelle;GO:0005622//intracellular;GO:0031224//intrinsic component of membrane;GO:0005623//cell;GO:0043229//intracellular organelle;GO:0043226//organelle;GO:0044464//cell part;GO:0016020//membrane;GO:0044424//intracellular part;GO:0043227//membrane-bounded organelle	-	GO:0044238//primary metabolic process;GO:0008593//regulation of Notch signaling pathway;GO:0006629//lipid metabolic process;GO:0050794//regulation of cellular process;GO:0050789//regulation of biological process;GO:0009987//cellular process;GO:0051179//localization;GO:0010646//regulation of cell communication;GO:0023051//regulation of signaling;GO:0071704//organic substance metabolic process;GO:0…
TCONS_00045973	27147.2	4.11	184.86	0.02	-13.1741	9.17748e-26	4.0849e-21	yes	RAG1	XP_005690149.2 PREDICTED: V(D)J recombination-activating protein 1 [Capra hircus]	Environmental Information Processing	Signal transduction	ko04068//FoxO signaling pathway	K10628	GO:0005623//cell;GO:0043226//organelle;GO:0043229//intracellular organelle;GO:0044424//intracellular part;GO:0044464//cell part;GO:0005622//intracellular;GO:0043231//intracellular membrane-bounded organelle;GO:0043227//membrane-bounded organelle	GO:0016788//hydrolase activity, acting on ester bonds;GO:0003676//nucleic acid binding;GO:0005515//protein binding;GO:0016879//ligase activity, forming carbon-nitrogen bonds;GO:0046872//metal ion binding;GO:0019787//ubiquitin-like protein transferase activity;GO:0016787//hydrolase activity;GO:0046983//protein dimerization activity;GO:0043169//cation binding;GO:1901363//heterocyclic compound bindi…	GO:0006139//nucleobase-containing compound metabolic process;GO:0022610//biological adhesion;GO:0006259//DNA metabolic process;GO:0070232//regulation of T cell apoptotic process;GO:0030154//cell differentiation;GO:0065007//biological regulation;GO:0043067//regulation of programmed cell death;GO:0070486//leukocyte aggregation;GO:0044237//cellular metabolic process;GO:0051249//regulation of lymphoc…
TCONS_00046052	460.863	92.87	3.42333	0.403333	-3.08536	0.000345541	0.00982122	yes	TCP11L1	XP_017914761.1 PREDICTED: T-complex protein 11-like protein 1 isoform X1 [Capra hircus]	-	-	-	-	-	-	-
TCONS_00046238	39.3567	0	0.49	0.001	-8.93664	0.00109782	0.0243623	yes	ATG16L2	XP_017914875.1 PREDICTED: autophagy-related protein 16-2 isoform X3 [Capra hircus]	Cellular Processes	Transport and catabolism	ko04140//Regulation of autophagy	K17890	-	-	GO:0044260//cellular macromolecule metabolic process;GO:0043170//macromolecule metabolic process;GO:0071704//organic substance metabolic process;GO:0034641//cellular nitrogen compound metabolic process;GO:0046483//heterocycle metabolic process;GO:0006807//nitrogen compound metabolic process;GO:0044238//primary metabolic process;GO:0006725//cellular aromatic compound metabolic process;GO:0044271//…
TCONS_00046394	200.033	1507.95	8.78667	38.3533	2.12596	0.00235545	0.0435567	yes	ARFIP2	XP_011809712.1 PREDICTED: arfaptin-2 isoform X1 [Colobus angolensis palliatus]	-	-	-	-	-	GO:0005515//protein binding;GO:0005488//binding	-
TCONS_00046605	102.78	2.54333	12.8467	0.206667	-5.95794	0.00186464	0.0365251	yes	Rps13	XP_009903474.1 PREDICTED: 40S ribosomal protein S13 [Picoides pubescens]	Genetic Information Processing	Translation	ko03010//Ribosome	K02953	-	-	-
TCONS_00046642	726.437	70.1033	8.57333	0.483333	-4.14877	2.07915e-07	1.82531e-05	yes	UBASH3B	NP_001193057.1 ubiquitin-associated and SH3 domain-containing protein B [Bos taurus]	-	-	-	-	-	-	GO:0051049//regulation of transport;GO:0032101//regulation of response to external stimulus;GO:1900046//regulation of hemostasis;GO:0051241//negative regulation of multicellular organismal process;GO:0032844//regulation of homeostatic process;GO:0044267//cellular protein metabolic process;GO:0061045//negative regulation of wound healing;GO:0009987//cellular process;GO:1900047//negative regulation…
TCONS_00046749	702.227	12.17	58.3567	0.6	-6.60379	1.15754e-12	5.20424e-10	yes	CD3G	XP_005977124.1 PREDICTED: T-cell surface glycoprotein CD3 gamma chain [Pantholops hodgsonii]	Organismal Systems	Immune system	ko04660//T cell receptor signaling pathway;ko04640//Hematopoietic cell lineage	K06452	GO:0071944//cell periphery;GO:0044464//cell part;GO:0005623//cell;GO:0044425//membrane part;GO:0044459//plasma membrane part;GO:0031224//intrinsic component of membrane;GO:0016020//membrane;GO:0042101//T cell receptor complex;GO:0043235//receptor complex;GO:0098797//plasma membrane protein complex;GO:0043234//protein complex;GO:0098796//membrane protein complex;GO:0005886//plasma membrane;GO:0098…	GO:0005488//binding;GO:0046983//protein dimerization activity;GO:0060089//molecular transducer activity;GO:0004872//receptor activity;GO:0004871//signal transducer activity;GO:0005515//protein binding;GO:0038023//signaling receptor activity	GO:0042981//regulation of apoptotic process;GO:0023052//signaling;GO:0007165//signal transduction;GO:0009987//cellular process;GO:0051179//localization;GO:0010941//regulation of cell death;GO:0051716//cellular response to stimulus;GO:0033036//macromolecule localization;GO:0065007//biological regulation;GO:0050794//regulation of cellular process;GO:0008104//protein localization;GO:0044700//single …
TCONS_00046890	62.1033	0	0.61	0.001	-9.25267	0.0021924	0.0412467	yes	ZC3H12C	XP_017915307.1 PREDICTED: probable ribonuclease ZC3H12C isoform X1 [Capra hircus]	-	-	-	-	-	-	-
TCONS_00047138	1048.9	13.14	8.48667	0.0766667	-6.79045	4.95313e-08	5.29961e-06	yes	CNTN2	XP_017915528.1 PREDICTED: contactin-2 isoform X2 [Capra hircus]	Environmental Information Processing	Signaling molecules and interaction	ko04514//Cell adhesion molecules (CAMs)	K06760	GO:0043005//neuron projection;GO:0031224//intrinsic component of membrane;GO:0034702//ion channel complex;GO:0044464//cell part;GO:0044463//cell projection part;GO:0034705//potassium channel complex;GO:0033267//axon part;GO:0016020//membrane;GO:0044297//cell body;GO:0005623//cell;GO:0034703//cation channel complex;GO:0032991//macromolecular complex;GO:1902495//transmembrane transporter complex;GO…	GO:0005488//binding;GO:0005515//protein binding	GO:0016477//cell migration;GO:0044767//single-organism developmental process;GO:0051246//regulation of protein metabolic process;GO:0009967//positive regulation of signal transduction;GO:0048518//positive regulation of biological process;GO:0048522//positive regulation of cellular process;GO:0007611//learning or memory;GO:0048583//regulation of response to stimulus;GO:0048519//negative regulation…
TCONS_00047168	603.273	1.02667	5.57667	0.00666667	-9.70822	6.53221e-06	0.000365262	yes	-	XP_017915559.1 PREDICTED: uncharacterized protein LOC108637764 [Capra hircus]	-	-	-	-	-	-	-
TCONS_00047484	93.7133	0	1.1	0.001	-10.1033	2.32654e-05	0.00107951	yes	-	XP_013825535.1 PREDICTED: uncharacterized protein LOC102188068 [Capra hircus]	-	-	-	-	-	-	-
TCONS_00047939	134.887	3.65333	10.0567	0.18	-5.80401	0.000360917	0.0101867	yes	TNFRSF18	XP_017916041.1 PREDICTED: tumor necrosis factor receptor superfamily member 18 isoform X1 [Capra hircus]	Environmental Information Processing	Signaling molecules and interaction	ko04060//Cytokine-cytokine receptor interaction	K05154	GO:0071944//cell periphery;GO:0044464//cell part;GO:0005886//plasma membrane;GO:0044459//plasma membrane part;GO:0016020//membrane;GO:0044425//membrane part;GO:0005623//cell	-	-
TCONS_00048025	965.157	240.783	4.03667	0.576667	-2.80735	0.000231556	0.00713678	yes	ZBTB37	XP_015347283.1 PREDICTED: zinc finger and BTB domain-containing protein 37 [Marmota marmota marmota]	-	-	-	-	GO:0044424//intracellular part;GO:0043227//membrane-bounded organelle;GO:0043229//intracellular organelle;GO:0043226//organelle;GO:0044464//cell part;GO:0005623//cell;GO:0043231//intracellular membrane-bounded organelle;GO:0005622//intracellular	GO:0043167//ion binding;GO:0043169//cation binding;GO:0005488//binding	-
TCONS_00048062	68.6067	0	0.76	0.001	-9.56986	0.00150842	0.030945	yes	RALGPS2	XP_005909926.1 PREDICTED: ras-specific guanine nucleotide-releasing factor RalGPS2 isoform X2 [Bos mutus]	-	-	-	-	GO:0005622//intracellular;GO:0016020//membrane;GO:0005623//cell;GO:0044464//cell part;GO:0044424//intracellular part	-	GO:0051336//regulation of hydrolase activity;GO:0043087//regulation of GTPase activity;GO:0065009//regulation of molecular function;GO:0050789//regulation of biological process;GO:0065007//biological regulation;GO:0050790//regulation of catalytic activity;GO:0019222//regulation of metabolic process
TCONS_00048125	64.52	2.29	1.85667	0.0366667	-5.6621	0.00190961	0.0371164	yes	NPL	XP_017916182.1 PREDICTED: N-acetylneuraminate lyase isoform X2 [Capra hircus]	Metabolism	Carbohydrate metabolism	ko00520//Amino sugar and nucleotide sugar metabolism	K01639	-	GO:0003824//catalytic activity;GO:0016833//oxo-acid-lyase activity;GO:0016829//lyase activity;GO:0016830//carbon-carbon lyase activity	-
TCONS_00048187	150.44	0	1.07	0.001	-10.0634	0.0018934	0.0368659	yes	PTPN14	XP_017916222.1 PREDICTED: tyrosine-protein phosphatase non-receptor type 14 [Capra hircus]	-	-	-	-	GO:0044464//cell part;GO:0043231//intracellular membrane-bounded organelle;GO:0043227//membrane-bounded organelle;GO:0043226//organelle;GO:0043229//intracellular organelle;GO:0043228//non-membrane-bounded organelle;GO:0043232//intracellular non-membrane-bounded organelle;GO:0044424//intracellular part;GO:0005623//cell;GO:0005622//intracellular	GO:0016791//phosphatase activity;GO:0003824//catalytic activity;GO:0000989//transcription factor activity, transcription factor binding;GO:0016787//hydrolase activity;GO:0005488//binding;GO:0005515//protein binding;GO:0016788//hydrolase activity, acting on ester bonds;GO:0042578//phosphoric ester hydrolase activity;GO:0004721//phosphoprotein phosphatase activity;GO:0000988//transcription factor a…	GO:0044238//primary metabolic process;GO:0051252//regulation of RNA metabolic process;GO:0008283//cell proliferation;GO:2001141//regulation of RNA biosynthetic process;GO:0031323//regulation of cellular metabolic process;GO:0009889//regulation of biosynthetic process;GO:0008152//metabolic process;GO:0050794//regulation of cellular process;GO:0006470//protein dephosphorylation;GO:0044699//single-o…
TCONS_00048420	395.243	9.44667	3.28333	0.0566667	-5.85652	0.000542057	0.013906	yes	Plekha6	XP_017915498.1 PREDICTED: pleckstrin homology domain-containing family A member 6 isoform X3 [Capra hircus]	-	-	-	-	-	-	-
TCONS_00048432	112.677	0	1.01	0.001	-9.98014	0.000627638	0.0156681	yes	PIK3C2B	XP_017915505.1 PREDICTED: phosphatidylinositol 4-phosphate 3-kinase C2 domain-containing subunit beta [Capra hircus]	Metabolism;Environmental Information Processing	Signal transduction;Carbohydrate metabolism;Global and Overview	ko01100//Metabolic pathways;ko04070//Phosphatidylinositol signaling system;ko00562//Inositol phosphate metabolism	K00923	GO:0005737//cytoplasm;GO:0043226//organelle;GO:0044444//cytoplasmic part;GO:0031410//cytoplasmic vesicle;GO:0044424//intracellular part;GO:0043227//membrane-bounded organelle;GO:0043229//intracellular organelle;GO:0005623//cell;GO:0031982//vesicle;GO:0016023//cytoplasmic, membrane-bounded vesicle;GO:0031988//membrane-bounded vesicle;GO:0005622//intracellular;GO:0043231//intracellular membrane-bou…	GO:0016301//kinase activity;GO:0001882//nucleoside binding;GO:0016772//transferase activity, transferring phosphorus-containing groups;GO:0036094//small molecule binding;GO:1901363//heterocyclic compound binding;GO:0001883//purine nucleoside binding;GO:0003824//catalytic activity;GO:0097367//carbohydrate derivative binding;GO:0032549//ribonucleoside binding;GO:0016740//transferase activity;GO:004…	GO:0050794//regulation of cellular process;GO:0044255//cellular lipid metabolic process;GO:0044700//single organism signaling;GO:0019637//organophosphate metabolic process;GO:0008152//metabolic process;GO:0007154//cell communication;GO:0044699//single-organism process;GO:0044763//single-organism cellular process;GO:0044238//primary metabolic process;GO:0046488//phosphatidylinositol metabolic proc…
TCONS_00048471	2494.08	881.167	18.88	3.99	-2.2424	0.000582702	0.0147784	yes	ELK4	XP_004013607.2 PREDICTED: ETS domain-containing protein Elk-4 isoform X2 [Ovis aries]	Environmental Information Processing	Signal transduction	ko04010//MAPK signaling pathway	K04376	-	-	-
TCONS_00048957	294.31	0	11.11	0.001	-13.4396	4.35441e-10	9.31802e-08	yes	CCDC181	XP_005690674.1 PREDICTED: coiled-coil domain-containing protein 181 [Capra hircus]	-	-	-	-	-	-	-
TCONS_00049036	197.913	0	0.906667	0.001	-9.82443	7.11854e-09	1.00268e-06	yes	VPS13D	XP_017915808.1 PREDICTED: vacuolar protein sorting-associated protein 13D isoform X1 [Capra hircus]	-	-	-	-	-	-	-
TCONS_00049040	283.513	67.3033	2.28	0.31	-2.87869	0.00188089	0.0367026	yes	TNFRSF8	XP_014963136.1 PREDICTED: tumor necrosis factor receptor superfamily member 8 [Ovis aries musimon]	Environmental Information Processing	Signaling molecules and interaction	ko04060//Cytokine-cytokine receptor interaction	K05145	GO:0043227//membrane-bounded organelle;GO:0031988//membrane-bounded vesicle;GO:0031982//vesicle;GO:0043226//organelle	-	GO:0009612//response to mechanical stimulus;GO:0050896//response to stimulus;GO:0009628//response to abiotic stimulus;GO:0001819//positive regulation of cytokine production;GO:0050789//regulation of biological process;GO:0043067//regulation of programmed cell death;GO:0065007//biological regulation;GO:0010941//regulation of cell death;GO:0051240//positive regulation of multicellular organismal pr…
TCONS_00049248	57.8667	0	0.45	0.001	-8.81378	0.000421704	0.0115013	yes	PRDM16	XP_017915960.1 PREDICTED: PR domain zinc finger protein 16 isoform X2 [Capra hircus]	-	-	-	-	GO:0005622//intracellular;GO:0043227//membrane-bounded organelle;GO:0044464//cell part;GO:0043226//organelle;GO:0043229//intracellular organelle;GO:0044424//intracellular part;GO:0005623//cell;GO:0043234//protein complex;GO:0043231//intracellular membrane-bounded organelle;GO:0032991//macromolecular complex	GO:0005488//binding;GO:0005515//protein binding;GO:0097159//organic cyclic compound binding;GO:0043167//ion binding;GO:0000988//transcription factor activity, protein binding;GO:1901363//heterocyclic compound binding;GO:0003677//DNA binding;GO:0003676//nucleic acid binding;GO:0043169//cation binding;GO:0003712//transcription cofactor activity;GO:0000989//transcription factor activity, transcripti…	GO:0017015//regulation of transforming growth factor beta receptor signaling pathway;GO:0043467//regulation of generation of precursor metabolites and energy;GO:0045637//regulation of myeloid cell differentiation;GO:0048856//anatomical structure development;GO:0050794//regulation of cellular process;GO:0051093//negative regulation of developmental process;GO:0009987//cellular process;GO:0002761//…
TCONS_00049465	0	377.63	0.001	1.41	10.4615	0.00130734	0.0278287	yes	ABL2	XP_004013883.1 PREDICTED: Abelson tyrosine-protein kinase 2 isoform X1 [Ovis aries]	Environmental Information Processing	Signal transduction	ko04014//Ras signaling pathway;ko04012//ErbB signaling pathway	K08887	-	-	-
TCONS_00049537	400.317	134.38	2.87667	0.536667	-2.4223	0.00281439	0.04969	yes	RNASEL	XP_017916177.1 PREDICTED: LOW QUALITY PROTEIN: 2-5A-dependent ribonuclease [Capra hircus]	-	-	-	-	-	GO:0016787//hydrolase activity;GO:0097159//organic cyclic compound binding;GO:0004518//nuclease activity;GO:1901363//heterocyclic compound binding;GO:0001882//nucleoside binding;GO:0036094//small molecule binding;GO:0016772//transferase activity, transferring phosphorus-containing groups;GO:0032550//purine ribonucleoside binding;GO:0032549//ribonucleoside binding;GO:0003824//catalytic activity;GO…	GO:0044237//cellular metabolic process;GO:1903900//regulation of viral life cycle;GO:0019538//protein metabolic process;GO:0043170//macromolecule metabolic process;GO:1901360//organic cyclic compound metabolic process;GO:0010467//gene expression;GO:0008152//metabolic process;GO:0019222//regulation of metabolic process;GO:1903506//regulation of nucleic acid-templated transcription;GO:0006464//cell…
TCONS_00049707	954.127	23.5967	7.21	0.11	-6.03442	1.52686e-11	5.10982e-09	yes	ASPM	XP_012007292.1 PREDICTED: abnormal spindle-like microcephaly-associated protein homolog isoform X2 [Ovis aries musimon]	-	-	-	-	GO:0043226//organelle;GO:0044424//intracellular part;GO:0044446//intracellular organelle part;GO:0043231//intracellular membrane-bounded organelle;GO:0044430//cytoskeletal part;GO:0005622//intracellular;GO:0015630//microtubule cytoskeleton;GO:0005819//spindle;GO:0043228//non-membrane-bounded organelle;GO:0043227//membrane-bounded organelle;GO:0044422//organelle part;GO:0043232//intracellular non-…	GO:0005488//binding;GO:0005515//protein binding	GO:0055057//neuroblast division;GO:0051321//meiotic cell cycle;GO:0071822//protein complex subunit organization;GO:0048609//multicellular organismal reproductive process;GO:0022412//cellular process involved in reproduction in multicellular organism;GO:0044707//single-multicellular organism process;GO:0000280//nuclear division;GO:0051704//multi-organism process;GO:0030111//regulation of Wnt signa…
TCONS_00050254	1885.23	700.777	52.5533	11.1	-2.24322	0.00111287	0.0245704	yes	Ppp1cc	XP_005403222.1 PREDICTED: serine/threonine-protein phosphatase PP1-gamma catalytic subunit [Chinchilla lanigera]	Environmental Information Processing;Cellular Processes;Genetic Information Processing;Organismal Systems	Nervous system;Sensory system;Signal transduction;Translation;Cell motility;Endocrine system;Cellular commiunity;Cell growth and death;Immune system;Circulatory system	ko04810//Regulation of actin cytoskeleton;ko04024//cAMP signaling pathway;ko04510//Focal adhesion;ko04921//Oxytocin signaling pathway;ko04022//cGMP - PKG signaling pathway;ko04261//Adrenergic signaling in cardiomyocytes;ko04390//Hippo signaling pathway;ko04910//Insulin signaling pathway;ko04270//Vascular smooth muscle contraction;ko04728//Dopaminergic synapse;ko04611//Platelet activation;ko04750/…	K06269	GO:0031981//nuclear lumen;GO:0030054//cell junction;GO:0016020//membrane;GO:0005654//nucleoplasm;GO:0034708//methyltransferase complex;GO:0031967//organelle envelope;GO:0005912//adherens junction;GO:0005623//cell;GO:0043231//intracellular membrane-bounded organelle;GO:0005737//cytoplasm;GO:0043227//membrane-bounded organelle;GO:0000776//kinetochore;GO:0097458//neuron part;GO:0005740//mitochondria…	GO:0019900//kinase binding;GO:1901363//heterocyclic compound binding;GO:0042578//phosphoric ester hydrolase activity;GO:0097159//organic cyclic compound binding;GO:0005488//binding;GO:0003824//catalytic activity;GO:0043167//ion binding;GO:0019899//enzyme binding;GO:0003676//nucleic acid binding;GO:0043169//cation binding;GO:0016787//hydrolase activity;GO:0016791//phosphatase activity;GO:0016788//…	GO:0044255//cellular lipid metabolic process;GO:0048646//anatomical structure formation involved in morphogenesis;GO:0032502//developmental process;GO:0035556//intracellular signal transduction;GO:0051179//localization;GO:0048856//anatomical structure development;GO:0006629//lipid metabolic process;GO:0051649//establishment of localization in cell;GO:0043170//macromolecule metabolic process;GO:00…
TCONS_00050307	2159.37	223.85	36.1533	2.54	-3.83123	8.49859e-06	0.000457957	yes	BCL7A	XP_011965653.1 PREDICTED: B-cell CLL/lymphoma 7 protein family member A isoform X4 [Ovis aries musimon]	-	-	-	-	-	GO:0005488//binding	GO:0019219//regulation of nucleobase-containing compound metabolic process;GO:0060255//regulation of macromolecule metabolic process;GO:0019222//regulation of metabolic process;GO:0010556//regulation of macromolecule biosynthetic process;GO:2001141//regulation of RNA biosynthetic process;GO:0031323//regulation of cellular metabolic process;GO:2000112//regulation of cellular macromolecule biosynth…
TCONS_00050430	6692.07	1023.75	32.66	3.32667	-3.29538	1.60472e-05	0.000794507	yes	EP400	XP_017916928.1 PREDICTED: E1A-binding protein p400 isoform X2 [Capra hircus]	-	-	-	-	GO:0044422//organelle part;GO:0043189//H4/H2A histone acetyltransferase complex;GO:0005623//cell;GO:0043226//organelle;GO:0044424//intracellular part;GO:0032991//macromolecular complex;GO:0043227//membrane-bounded organelle;GO:0044451//nucleoplasm part;GO:0000123//histone acetyltransferase complex;GO:0031981//nuclear lumen;GO:0005654//nucleoplasm;GO:0005634//nucleus;GO:1902562//H4 histone acetylt…	GO:0005488//binding;GO:1901363//heterocyclic compound binding;GO:0003676//nucleic acid binding;GO:0001882//nucleoside binding;GO:0032549//ribonucleoside binding;GO:0097367//carbohydrate derivative binding;GO:0036094//small molecule binding;GO:0001883//purine nucleoside binding;GO:0032550//purine ribonucleoside binding;GO:0097159//organic cyclic compound binding	GO:0006473//protein acetylation;GO:0071704//organic substance metabolic process;GO:0044237//cellular metabolic process;GO:0006325//chromatin organization;GO:0006996//organelle organization;GO:0044763//single-organism cellular process;GO:0036211//protein modification process;GO:0044699//single-organism process;GO:0006475//internal protein amino acid acetylation;GO:0043412//macromolecule modificati…
TCONS_00050559	39.0067	0	1.30667	0.001	-10.3517	0.00114894	0.0251547	yes	Spata5	DAA20833.1 TPA: spermatogenesis associated 5-like [Bos taurus]	Genetic Information Processing	Translation	ko03008//Ribosome biogenesis in eukaryotes	K14575	GO:0044464//cell part;GO:0005622//intracellular;GO:0044424//intracellular part;GO:0005623//cell	GO:0036094//small molecule binding;GO:0005488//binding	-
TCONS_00050588	45.7967	0	0.896667	0.001	-9.80843	0.000993058	0.0226322	yes	PLK4	XP_013825986.2 PREDICTED: serine/threonine-protein kinase PLK4 isoform X1 [Capra hircus]	Environmental Information Processing	Signal transduction	ko04068//FoxO signaling pathway	K08863	GO:0044430//cytoskeletal part;GO:0044422//organelle part;GO:0015630//microtubule cytoskeleton;GO:0044424//intracellular part;GO:0043226//organelle;GO:0043232//intracellular non-membrane-bounded organelle;GO:0043228//non-membrane-bounded organelle;GO:0043229//intracellular organelle;GO:0005815//microtubule organizing center;GO:0044464//cell part;GO:0005856//cytoskeleton;GO:0044446//intracellular o…	GO:0032550//purine ribonucleoside binding;GO:0097159//organic cyclic compound binding;GO:0005515//protein binding;GO:0004672//protein kinase activity;GO:0016740//transferase activity;GO:0016772//transferase activity, transferring phosphorus-containing groups;GO:0003824//catalytic activity;GO:0032549//ribonucleoside binding;GO:0001882//nucleoside binding;GO:0036094//small molecule binding;GO:00167…	GO:0051130//positive regulation of cellular component organization;GO:0051128//regulation of cellular component organization;GO:0044238//primary metabolic process;GO:0022607//cellular component assembly;GO:0051495//positive regulation of cytoskeleton organization;GO:0006996//organelle organization;GO:0060706//cell differentiation involved in embryonic placenta development;GO:0006793//phosphorus m…
TCONS_00050803	905.477	252.977	13.2733	2.32667	-2.51219	0.000427392	0.0115841	yes	-	XP_017917109.1 PREDICTED: transmembrane protein 131-like [Capra hircus]	-	-	-	-	-	-	-
TCONS_00050804	48.7967	0	0.553333	0.001	-9.11201	0.00104057	0.0233683	yes	-	XP_017917109.1 PREDICTED: transmembrane protein 131-like [Capra hircus]	-	-	-	-	-	-	-
TCONS_00050903	12.3067	2219.77	1.86	204.483	6.78054	2.99184e-06	0.000186247	yes	-	XP_005959731.1 PREDICTED: uncharacterized protein LOC102337103 [Pantholops hodgsonii]	-	-	-	-	GO:0016020//membrane	GO:0005488//binding	GO:0044710//single-organism metabolic process;GO:0002684//positive regulation of immune system process;GO:0044238//primary metabolic process;GO:0007165//signal transduction;GO:0050778//positive regulation of immune response;GO:0002764//immune response-regulating signaling pathway;GO:0002429//immune response-activating cell surface receptor signaling pathway;GO:0007154//cell communication;GO:00230…
TCONS_00050966	89.0467	0.0766667	2.91667	0.001	-11.5101	0.000791481	0.0188188	yes	TCN2	XP_005691691.2 PREDICTED: transcobalamin-2 [Capra hircus]	Organismal Systems	Digestive system	ko04977//Vitamin digestion and absorption	K14619	-	-	-
TCONS_00051062	0	199.737	0.001	2.69667	11.397	0.000476956	0.0125617	yes	ASPHD2	XP_011967921.1 PREDICTED: aspartate beta-hydroxylase domain-containing protein 2 [Ovis aries musimon]	-	-	-	-	-	-	GO:0044260//cellular macromolecule metabolic process;GO:0044238//primary metabolic process;GO:0036211//protein modification process;GO:0043412//macromolecule modification;GO:0009987//cellular process;GO:0006464//cellular protein modification process;GO:0043170//macromolecule metabolic process;GO:0044267//cellular protein metabolic process;GO:0008152//metabolic process;GO:0019538//protein metaboli…
TCONS_00051068	239.64	1	2.32333	0.00666667	-8.44501	1.65297e-06	0.000115319	yes	MYO18B	XP_017916558.1 PREDICTED: unconventional myosin-XVIIIb isoform X2 [Capra hircus]	-	-	-	-	GO:0005737//cytoplasm;GO:0005623//cell;GO:0030017//sarcomere;GO:0044424//intracellular part;GO:0044444//cytoplasmic part;GO:0044449//contractile fiber part;GO:0043292//contractile fiber;GO:0032991//macromolecular complex;GO:0043229//intracellular organelle;GO:0005622//intracellular;GO:0043226//organelle;GO:0043232//intracellular non-membrane-bounded organelle;GO:0031674//I band;GO:0015629//actin …	GO:0032550//purine ribonucleoside binding;GO:1901363//heterocyclic compound binding;GO:0001883//purine nucleoside binding;GO:0005488//binding;GO:0032549//ribonucleoside binding;GO:0001882//nucleoside binding;GO:0016462//pyrophosphatase activity;GO:0016787//hydrolase activity;GO:0016818//hydrolase activity, acting on acid anhydrides, in phosphorus-containing anhydrides;GO:0097159//organic cyclic c…	GO:0061061//muscle structure development;GO:0048747//muscle fiber development;GO:0042692//muscle cell differentiation;GO:0044707//single-multicellular organism process;GO:0055001//muscle cell development;GO:0009792//embryo development ending in birth or egg hatching;GO:0043009//chordate embryonic development;GO:0048468//cell development;GO:0051146//striated muscle cell differentiation;GO:0030154/…
TCONS_00051330	485.9	22.9	3.1	0.0833333	-5.21723	0.000891663	0.0206708	yes	NOS1	XP_017916710.1 PREDICTED: nitric oxide synthase, brain [Capra hircus]	Metabolism;Cellular Processes;Environmental Information Processing;Organismal Systems	Transport and catabolism;Digestive system;Amino acid metabolism;Signal transduction;Global and Overview;Nervous system;Environmental adaptation	ko01100//Metabolic pathways;ko04020//Calcium signaling pathway;ko04145//Phagosome;ko04713//Circadian entrainment;ko01110//Biosynthesis of secondary metabolites;ko04970//Salivary secretion;ko04730//Long-term depression;ko00330//Arginine and proline metabolism;ko00220//Arginine biosynthesis	K13240	GO:0044309//neuron spine;GO:0098589//membrane region;GO:0005737//cytoplasm;GO:0005623//cell;GO:0043228//non-membrane-bounded organelle;GO:0043231//intracellular membrane-bounded organelle;GO:0005886//plasma membrane;GO:0012505//endomembrane system;GO:0043232//intracellular non-membrane-bounded organelle;GO:0098805//whole membrane;GO:0043229//intracellular organelle;GO:0042995//cell projection;GO:…	GO:0043169//cation binding;GO:0043167//ion binding;GO:0005488//binding;GO:0003824//catalytic activity;GO:0005515//protein binding	GO:0010648//negative regulation of cell communication;GO:0019538//protein metabolic process;GO:0044699//single-organism process;GO:0031401//positive regulation of protein modification process;GO:0008152//metabolic process;GO:0010556//regulation of macromolecule biosynthetic process;GO:0010959//regulation of metal ion transport;GO:0002026//regulation of the force of heart contraction;GO:0015672//m…
TCONS_00051353	704.6	20.98	5.32667	0.103333	-5.68786	0.000282841	0.00833174	yes	Cit	XP_017916720.1 PREDICTED: citron Rho-interacting kinase isoform X3 [Capra hircus]	-	-	-	-	GO:0043232//intracellular non-membrane-bounded organelle;GO:0044464//cell part;GO:0005623//cell;GO:0005856//cytoskeleton;GO:0031252//cell leading edge;GO:0043229//intracellular organelle;GO:0043231//intracellular membrane-bounded organelle;GO:0043228//non-membrane-bounded organelle;GO:0043227//membrane-bounded organelle;GO:0044424//intracellular part;GO:0005622//intracellular;GO:0043226//organelle	GO:0004672//protein kinase activity;GO:0036094//small molecule binding;GO:0032549//ribonucleoside binding;GO:0001882//nucleoside binding;GO:0032550//purine ribonucleoside binding;GO:0005488//binding;GO:0097367//carbohydrate derivative binding;GO:1901363//heterocyclic compound binding;GO:0043169//cation binding;GO:0019904//protein domain specific binding;GO:0003824//catalytic activity;GO:0001883//…	GO:0023052//signaling;GO:0048523//negative regulation of cellular process;GO:0019953//sexual reproduction;GO:0050794//regulation of cellular process;GO:0044267//cellular protein metabolic process;GO:0060284//regulation of cell development;GO:0048731//system development;GO:0048609//multicellular organismal reproductive process;GO:0000003//reproduction;GO:0032504//multicellular organism reproductio…
TCONS_00051435	874.193	10.1867	29.1667	0.243333	-6.90524	6.95435e-06	0.00038644	yes	RHOF	ELR49827.1 Rho-related GTP-binding protein RhoF, partial [Bos mutus]	-	-	-	-	GO:0016020//membrane;GO:0043232//intracellular non-membrane-bounded organelle;GO:0043227//membrane-bounded organelle;GO:0044424//intracellular part;GO:0005623//cell;GO:0031982//vesicle;GO:0043229//intracellular organelle;GO:0043226//organelle;GO:0043228//non-membrane-bounded organelle;GO:0044464//cell part;GO:0031988//membrane-bounded vesicle;GO:0005622//intracellular	GO:1901363//heterocyclic compound binding;GO:0005488//binding;GO:0097367//carbohydrate derivative binding;GO:0032550//purine ribonucleoside binding;GO:0036094//small molecule binding;GO:0001882//nucleoside binding;GO:0001883//purine nucleoside binding;GO:0032549//ribonucleoside binding;GO:0097159//organic cyclic compound binding	GO:0050896//response to stimulus;GO:0050794//regulation of cellular process;GO:0035556//intracellular signal transduction;GO:0023052//signaling;GO:0007154//cell communication;GO:0044700//single organism signaling;GO:0016043//cellular component organization;GO:0007165//signal transduction;GO:0065007//biological regulation;GO:0044699//single-organism process;GO:0044763//single-organism cellular pro…
TCONS_00051495	1221.53	29.4	11.4133	0.18	-5.98658	1.18042e-06	8.52927e-05	yes	PITPNM2	XP_017916829.1 PREDICTED: membrane-associated phosphatidylinositol transfer protein 2 isoform X3 [Capra hircus]	-	-	-	-	GO:0043226//organelle;GO:0005623//cell;GO:0044464//cell part;GO:0043227//membrane-bounded organelle	GO:0005488//binding;GO:0043167//ion binding;GO:0043169//cation binding	GO:0051234//establishment of localization;GO:0051179//localization
TCONS_00051675	64.6767	0	0.643333	0.001	-9.32942	0.000110651	0.00398468	yes	ZNF84	XP_005961786.1 PREDICTED: zinc finger protein 84 [Pantholops hodgsonii]	-	-	-	-	-	-	-
TCONS_00052088	796.57	50.9967	8.00667	0.323333	-4.63011	5.91708e-08	6.15348e-06	yes	ZNRF1	EDL11501.1 zinc and ring finger 1, isoform CRA_a, partial [Mus musculus]	-	-	-	-	GO:0000323//lytic vacuole;GO:0044422//organelle part;GO:0043226//organelle;GO:0043231//intracellular membrane-bounded organelle;GO:0044446//intracellular organelle part;GO:0044444//cytoplasmic part;GO:0043227//membrane-bounded organelle;GO:0005737//cytoplasm;GO:0005623//cell;GO:0043229//intracellular organelle;GO:0005622//intracellular;GO:0044464//cell part;GO:0044433//cytoplasmic vesicle part;GO…	GO:0046914//transition metal ion binding;GO:0043167//ion binding;GO:0016879//ligase activity, forming carbon-nitrogen bonds;GO:0070739//protein-glutamic acid ligase activity;GO:0016740//transferase activity;GO:0003824//catalytic activity;GO:0004842//ubiquitin-protein transferase activity;GO:0043169//cation binding;GO:0019787//ubiquitin-like protein transferase activity;GO:0005488//binding;GO:0070…	GO:0009057//macromolecule catabolic process;GO:0044237//cellular metabolic process;GO:0043632//modification-dependent macromolecule catabolic process;GO:0006996//organelle organization;GO:0030163//protein catabolic process;GO:0000209//protein polyubiquitination;GO:0071704//organic substance metabolic process;GO:0043412//macromolecule modification;GO:0044257//cellular protein catabolic process;GO:…
TCONS_00052111	1170.22	11.8933	2.97333	0.02	-7.21594	6.23698e-07	4.88746e-05	yes	pol	XP_012770936.1 hypothetical protein, conserved [Babesia bigemina]	-	-	-	-	-	-	-
TCONS_00052112	1428.81	52.8367	3.81667	0.0866667	-5.46069	4.51573e-10	9.617e-08	yes	Pol	XP_012770936.1 hypothetical protein, conserved [Babesia bigemina]	-	-	-	-	-	-	-
TCONS_00052129	371.09	80.57	1.37	0.17	-3.01057	0.00054719	0.0140091	yes	WWOX	XP_005905762.2 PREDICTED: WW domain-containing oxidoreductase [Bos mutus]	-	-	-	-	GO:0005622//intracellular;GO:0005737//cytoplasm;GO:0043229//intracellular organelle;GO:0044464//cell part;GO:0044444//cytoplasmic part;GO:0043226//organelle;GO:0042995//cell projection;GO:0043231//intracellular membrane-bounded organelle;GO:0044424//intracellular part;GO:0016020//membrane;GO:0043227//membrane-bounded organelle;GO:0005623//cell	GO:0003824//catalytic activity;GO:0005515//protein binding;GO:0005488//binding	GO:0023052//signaling;GO:0032502//developmental process;GO:0080090//regulation of primary metabolic process;GO:0006915//apoptotic process;GO:0071310//cellular response to organic substance;GO:0048585//negative regulation of response to stimulus;GO:0007275//multicellular organism development;GO:0044700//single organism signaling;GO:0072331//signal transduction by p53 class mediator;GO:0010648//neg…
TCONS_00052244	152.413	0	2.69	0.001	-11.3934	1.80807e-06	0.000123054	yes	ZC3H18	XP_017917335.1 PREDICTED: zinc finger CCCH domain-containing protein 18 isoform X1 [Capra hircus]	-	-	-	-	GO:0005623//cell;GO:0043226//organelle;GO:0043229//intracellular organelle;GO:0005622//intracellular;GO:0044424//intracellular part;GO:0044464//cell part;GO:0043231//intracellular membrane-bounded organelle;GO:0043227//membrane-bounded organelle	GO:0005488//binding;GO:0043169//cation binding;GO:0043167//ion binding	-
TCONS_00052381	180.423	8.65333	1.18	0.0333333	-5.14568	0.00242834	0.044553	yes	CHD9	XP_005692032.2 PREDICTED: chromodomain-helicase-DNA-binding protein 9 isoform X5 [Capra hircus]	-	-	-	-	GO:0043226//organelle;GO:0043231//intracellular membrane-bounded organelle;GO:0044424//intracellular part;GO:0005623//cell;GO:0043227//membrane-bounded organelle;GO:0005622//intracellular;GO:0044464//cell part;GO:0043229//intracellular organelle	GO:0097159//organic cyclic compound binding;GO:0001882//nucleoside binding;GO:0005488//binding;GO:0032550//purine ribonucleoside binding;GO:1901363//heterocyclic compound binding;GO:0036094//small molecule binding;GO:0097367//carbohydrate derivative binding;GO:0016787//hydrolase activity;GO:0001883//purine nucleoside binding;GO:0032549//ribonucleoside binding;GO:0003824//catalytic activity	-
TCONS_00052615	87.3667	0	0.756667	0.001	-9.56351	3.34381e-05	0.00147505	yes	FAM65A	XP_017917640.1 PREDICTED: protein FAM65A isoform X1 [Capra hircus]	-	-	-	-	GO:0043226//organelle;GO:0031988//membrane-bounded vesicle;GO:0043227//membrane-bounded organelle;GO:0031982//vesicle	-	-
TCONS_00052619	350.087	53.86	5.44	0.466667	-3.54314	0.000204313	0.00644506	yes	Ctcf	XP_006072096.1 PREDICTED: transcriptional repressor CTCF isoform X6 [Bubalus bubalis]	-	-	-	-	GO:0043231//intracellular membrane-bounded organelle;GO:0044464//cell part;GO:0005623//cell;GO:0005622//intracellular;GO:0043227//membrane-bounded organelle;GO:0043228//non-membrane-bounded organelle;GO:0044427//chromosomal part;GO:0044428//nuclear part;GO:0044422//organelle part;GO:0031974//membrane-enclosed lumen;GO:0098687//chromosomal region;GO:0044424//intracellular part;GO:0043226//organell…	GO:0001012//RNA polymerase II regulatory region DNA binding;GO:0043565//sequence-specific DNA binding;GO:0000981//RNA polymerase II transcription factor activity, sequence-specific DNA binding;GO:0003712//transcription cofactor activity;GO:0003677//DNA binding;GO:0003690//double-stranded DNA binding;GO:0005488//binding;GO:0001071//nucleic acid binding transcription factor activity;GO:0000976//tra…	GO:0071840//cellular component organization or biogenesis;GO:0006304//DNA modification;GO:0032268//regulation of cellular protein metabolic process;GO:0031326//regulation of cellular biosynthetic process;GO:0044238//primary metabolic process;GO:0006355//regulation of transcription, DNA-templated;GO:0033045//regulation of sister chromatid segregation;GO:0006996//organelle organization;GO:0006305//…
TCONS_00052626	992.497	17.5133	13.7867	0.166667	-6.37016	4.71641e-10	9.99643e-08	yes	RLTPR	XP_017917653.1 PREDICTED: LOW QUALITY PROTEIN: capping protein, Arp2/3 and myosin-I linker protein 2 [Capra hircus]	-	-	-	-	GO:0030054//cell junction;GO:0044424//intracellular part;GO:0043228//non-membrane-bounded organelle;GO:0044464//cell part;GO:0043226//organelle;GO:0015629//actin cytoskeleton;GO:0005623//cell;GO:0043232//intracellular non-membrane-bounded organelle;GO:0005856//cytoskeleton;GO:0005622//intracellular;GO:0043229//intracellular organelle	-	GO:0030155//regulation of cell adhesion;GO:0002764//immune response-regulating signaling pathway;GO:0033036//macromolecule localization;GO:0051240//positive regulation of multicellular organismal process;GO:0050870//positive regulation of T cell activation;GO:1903039//positive regulation of leukocyte cell-cell adhesion;GO:0050793//regulation of developmental process;GO:0042592//homeostatic proces…
TCONS_00053001	132.4	2.14	1.94	0.02	-6.59991	0.000169406	0.00558443	yes	ARHGAP33	XP_017918780.1 PREDICTED: LOW QUALITY PROTEIN: rho GTPase-activating protein 33 [Capra hircus]	-	-	-	-	GO:0044464//cell part;GO:0005623//cell;GO:0044424//intracellular part;GO:0016020//membrane;GO:0005622//intracellular	GO:0043168//anion binding;GO:0008289//lipid binding;GO:0043167//ion binding;GO:0005543//phospholipid binding;GO:0005488//binding	GO:0065007//biological regulation;GO:0050789//regulation of biological process;GO:0050794//regulation of cellular process
TCONS_00053016	42.9667	0	0.483333	0.001	-8.91687	0.000733914	0.0176962	yes	WDR62	XP_005692571.3 PREDICTED: WD repeat-containing protein 62 [Capra hircus]	-	-	-	-	GO:0005622//intracellular;GO:0044464//cell part;GO:0043229//intracellular organelle;GO:0043227//membrane-bounded organelle;GO:0044424//intracellular part;GO:0043226//organelle;GO:0043231//intracellular membrane-bounded organelle;GO:0005623//cell	-	GO:0030154//cell differentiation;GO:0032502//developmental process;GO:0048869//cellular developmental process;GO:0009987//cellular process;GO:0044699//single-organism process;GO:0044763//single-organism cellular process;GO:0044767//single-organism developmental process
TCONS_00053647	43.84	0	0.826667	0.001	-9.69116	0.00072659	0.0175764	yes	CPT1C	XP_017918291.1 PREDICTED: carnitine O-palmitoyltransferase 1, brain isoform isoform X1 [Capra hircus]	Organismal Systems;Metabolism;Environmental Information Processing	Signal transduction;Global and Overview;Endocrine system;Lipid metabolism	ko04152//AMPK signaling pathway;ko04922//Glucagon signaling pathway;ko03320//PPAR signaling pathway;ko04920//Adipocytokine signaling pathway;ko01212//Fatty acid metabolism;ko00071//Fatty acid degradation	K19524	GO:0008328//ionotropic glutamate receptor complex;GO:0044425//membrane part;GO:0031224//intrinsic component of membrane;GO:0034702//ion channel complex;GO:0098796//membrane protein complex;GO:0098797//plasma membrane protein complex;GO:0016021//integral component of membrane;GO:1902495//transmembrane transporter complex;GO:0016020//membrane;GO:0044464//cell part;GO:0032991//macromolecular complex…	GO:0003824//catalytic activity;GO:0016740//transferase activity	-
TCONS_00053678	137.85	3.80667	4.58	0.08	-5.8392	0.000183002	0.00589821	yes	Spib	XP_017918373.1 PREDICTED: transcription factor Spi-B isoform X3 [Capra hircus]	-	-	-	-	GO:0005623//cell;GO:0044424//intracellular part;GO:0044464//cell part;GO:0005622//intracellular;GO:0043226//organelle;GO:0043229//intracellular organelle;GO:0043227//membrane-bounded organelle;GO:0043231//intracellular membrane-bounded organelle	GO:0097159//organic cyclic compound binding;GO:0005488//binding;GO:0003676//nucleic acid binding;GO:0001071//nucleic acid binding transcription factor activity;GO:0003677//DNA binding;GO:1901363//heterocyclic compound binding	GO:0002376//immune system process;GO:0002520//immune system development;GO:0048869//cellular developmental process;GO:0010468//regulation of gene expression;GO:0032501//multicellular organismal process;GO:0032502//developmental process;GO:0044767//single-organism developmental process;GO:0044699//single-organism process;GO:0048731//system development;GO:0050789//regulation of biological process;G…
TCONS_00053813	709.203	0	15.83	0.001	-13.9504	8.29113e-19	2.05021e-15	yes	SLC7A3	XP_014337801.1 PREDICTED: cationic amino acid transporter 3-like [Bos mutus]	-	-	-	-	-	-	-
TCONS_00053823	270.083	36.98	5.99667	0.546667	-3.45543	0.00107074	0.0239011	yes	SLC7A3	XP_017918516.1 PREDICTED: cationic amino acid transporter 3 isoform X2 [Capra hircus]	-	-	-	-	GO:0016020//membrane;GO:0044425//membrane part;GO:0031224//intrinsic component of membrane	GO:0008509//anion transmembrane transporter activity;GO:0022891//substrate-specific transmembrane transporter activity;GO:0022857//transmembrane transporter activity;GO:0005342//organic acid transmembrane transporter activity;GO:0005215//transporter activity;GO:0008514//organic anion transmembrane transporter activity;GO:0046943//carboxylic acid transmembrane transporter activity;GO:0015075//ion …	-
TCONS_00053836	490.877	0	7.19	0.001	-12.8118	1.27036e-15	1.20306e-12	yes	SLC7A3	XP_017918521.1 PREDICTED: cationic amino acid transporter 3-like [Capra hircus]	-	-	-	-	GO:0016020//membrane;GO:0044425//membrane part;GO:0031224//intrinsic component of membrane	GO:0005215//transporter activity;GO:0046943//carboxylic acid transmembrane transporter activity;GO:0022891//substrate-specific transmembrane transporter activity;GO:0008509//anion transmembrane transporter activity;GO:0008514//organic anion transmembrane transporter activity;GO:0015075//ion transmembrane transporter activity;GO:0005342//organic acid transmembrane transporter activity;GO:0022892//…	GO:0006811//ion transport;GO:0006810//transport;GO:0046942//carboxylic acid transport;GO:0006820//anion transport;GO:0015849//organic acid transport;GO:1902578//single-organism localization;GO:0051179//localization;GO:0044699//single-organism process;GO:0071702//organic substance transport;GO:0015711//organic anion transport;GO:0044765//single-organism transport;GO:0051234//establishment of local…
TCONS_00053840	743.61	4.64	4.65	0.0166667	-8.12412	1.26226e-09	2.35077e-07	yes	SLC7A3	XP_014946695.1 PREDICTED: cationic amino acid transporter 3-like isoform X1 [Ovis aries musimon]	-	-	-	-	GO:0016020//membrane;GO:0031224//intrinsic component of membrane;GO:0044425//membrane part	GO:0046943//carboxylic acid transmembrane transporter activity;GO:0005342//organic acid transmembrane transporter activity;GO:0022891//substrate-specific transmembrane transporter activity;GO:0005215//transporter activity;GO:0008509//anion transmembrane transporter activity;GO:0022857//transmembrane transporter activity;GO:0015075//ion transmembrane transporter activity;GO:0022892//substrate-spec…	-
TCONS_00053879	720.207	182.69	54.5567	9.22667	-2.56387	0.00129027	0.0275633	yes	UBE2S	XP_015313870.1 PREDICTED: ubiquitin-conjugating enzyme E2 S isoform X1 [Bos taurus]	Genetic Information Processing	Folding, sorting and degradation	ko04120//Ubiquitin mediated proteolysis	K10583	GO:0005622//intracellular;GO:0005634//nucleus;GO:0044446//intracellular organelle part;GO:0044424//intracellular part;GO:0043226//organelle;GO:1990234//transferase complex;GO:0005623//cell;GO:0044464//cell part;GO:0043227//membrane-bounded organelle;GO:0044428//nuclear part;GO:0032991//macromolecular complex;GO:0000151//ubiquitin ligase complex;GO:0043231//intracellular membrane-bounded organelle…	GO:1901363//heterocyclic compound binding;GO:0003824//catalytic activity;GO:0005488//binding;GO:0036094//small molecule binding;GO:0097159//organic cyclic compound binding;GO:0001883//purine nucleoside binding;GO:0032549//ribonucleoside binding;GO:0001882//nucleoside binding;GO:0016740//transferase activity;GO:0032550//purine ribonucleoside binding;GO:0019787//ubiquitin-like protein transferase a…	GO:0051247//positive regulation of protein metabolic process;GO:1903322//positive regulation of protein modification by small protein conjugation or removal;GO:0044260//cellular macromolecule metabolic process;GO:0009987//cellular process;GO:0031396//regulation of protein ubiquitination;GO:0032270//positive regulation of cellular protein metabolic process;GO:0006464//cellular protein modification…
TCONS_00053935	560.983	105.853	8.70333	0.923333	-3.23664	0.000637473	0.0158425	yes	Leng8	XP_017918619.1 PREDICTED: leukocyte receptor cluster member 8 isoform X1 [Capra hircus]	-	-	-	-	-	-	-
TCONS_00054358	409.223	47.61	20.6467	1.24333	-4.05362	0.00243038	0.044572	yes	COTL1	XP_006045774.1 PREDICTED: coactosin-like protein [Bubalus bubalis]	-	-	-	-	GO:0031982//vesicle;GO:0044464//cell part;GO:0043226//organelle;GO:0043227//membrane-bounded organelle;GO:0044424//intracellular part;GO:0016020//membrane;GO:0043231//intracellular membrane-bounded organelle;GO:0005622//intracellular;GO:0043232//intracellular non-membrane-bounded organelle;GO:0043228//non-membrane-bounded organelle;GO:0044422//organelle part;GO:0043229//intracellular organelle;GO…	GO:0005515//protein binding;GO:0005488//binding	GO:0043207//response to external biotic stimulus;GO:0051707//response to other organism;GO:0009607//response to biotic stimulus;GO:0051704//multi-organism process;GO:0009605//response to external stimulus;GO:0009620//response to fungus;GO:0050896//response to stimulus
TCONS_00054768	569.133	105.667	4.55	0.503333	-3.17628	0.00241413	0.0443837	yes	ATXN1L	XP_005692272.2 PREDICTED: ataxin-1-like [Capra hircus]	-	-	-	-	-	GO:0097159//organic cyclic compound binding;GO:0003676//nucleic acid binding;GO:0005488//binding;GO:1901363//heterocyclic compound binding	GO:0071840//cellular component organization or biogenesis;GO:0072091//regulation of stem cell proliferation;GO:0044699//single-organism process;GO:0044763//single-organism cellular process;GO:0002682//regulation of immune system process;GO:0050789//regulation of biological process;GO:0065007//biological regulation;GO:2000026//regulation of multicellular organismal development;GO:0050794//regulati…
TCONS_00054907	214.223	0	11.9767	0.001	-13.5479	1.19716e-07	1.14424e-05	yes	-	XP_005908255.1 PREDICTED: uncharacterized protein LOC102273771 [Bos mutus]	-	-	-	-	-	-	-
TCONS_00054916	293.95	28.77	11.2033	0.713333	-3.97321	0.000305467	0.00886332	yes	IGFLR1	XP_006068851.1 PREDICTED: IGF-like family receptor 1 [Bubalus bubalis]	-	-	-	-	GO:0031224//intrinsic component of membrane;GO:0016020//membrane;GO:0044425//membrane part	-	-
TCONS_00055044	585.257	116.637	15.1167	1.95667	-2.94967	0.000804329	0.0190328	yes	RINL	XP_011986592.1 PREDICTED: ras and Rab interactor-like protein isoform X2 [Ovis aries musimon]	-	-	-	-	GO:0043232//intracellular non-membrane-bounded organelle;GO:0043226//organelle;GO:0005856//cytoskeleton;GO:0043228//non-membrane-bounded organelle;GO:0005622//intracellular;GO:0044464//cell part;GO:0005623//cell;GO:0044424//intracellular part;GO:0043229//intracellular organelle	-	GO:0050790//regulation of catalytic activity;GO:0051336//regulation of hydrolase activity;GO:0051234//establishment of localization;GO:0019222//regulation of metabolic process;GO:0006810//transport;GO:0050789//regulation of biological process;GO:0016192//vesicle-mediated transport;GO:0043087//regulation of GTPase activity;GO:0065007//biological regulation;GO:0051179//localization;GO:0065009//regu…
TCONS_00055193	606.047	117.48	3.86667	0.453333	-3.09245	0.000199799	0.00633325	yes	Megf8	XP_017917953.1 PREDICTED: multiple epidermal growth factor-like domains protein 8 [Capra hircus]	-	-	-	-	GO:0043227//membrane-bounded organelle;GO:0016020//membrane;GO:0043229//intracellular organelle;GO:0044464//cell part;GO:0005622//intracellular;GO:0044425//membrane part;GO:0043231//intracellular membrane-bounded organelle;GO:0005623//cell;GO:0044424//intracellular part;GO:0031224//intrinsic component of membrane;GO:0031988//membrane-bounded vesicle;GO:0031982//vesicle;GO:0043226//organelle	GO:0043167//ion binding;GO:0046872//metal ion binding;GO:0043169//cation binding;GO:0005488//binding;GO:0060089//molecular transducer activity	GO:0048736//appendage development;GO:0060972//left/right pattern formation;GO:0007167//enzyme linked receptor protein signaling pathway;GO:0045773//positive regulation of axon extension;GO:0032501//multicellular organismal process;GO:0023052//signaling;GO:0009987//cellular process;GO:0045927//positive regulation of growth;GO:0044707//single-multicellular organism process;GO:0016043//cellular comp…
TCONS_00055238	104.593	3.71333	1.87	0.04	-5.54689	0.00139442	0.0290705	yes	Ceacam1	XP_017918671.1 PREDICTED: LOW QUALITY PROTEIN: carcinoembryonic antigen-related cell adhesion molecule 21 [Capra hircus]	-	-	-	-	-	-	-
TCONS_00055353	428.647	126.307	3.53667	0.643333	-2.45875	0.00215906	0.0408066	yes	DMPK	XP_011830507.1 PREDICTED: myotonin-protein kinase isoform X1 [Mandrillus leucophaeus]	-	-	-	-	GO:0098573//intrinsic component of mitochondrial membrane;GO:0044422//organelle part;GO:0044425//membrane part;GO:0098805//whole membrane;GO:0043231//intracellular membrane-bounded organelle;GO:0031966//mitochondrial membrane;GO:0031967//organelle envelope;GO:0044446//intracellular organelle part;GO:0005789//endoplasmic reticulum membrane;GO:0031306//intrinsic component of mitochondrial outer mem…	GO:0016301//kinase activity;GO:0005488//binding;GO:0001882//nucleoside binding;GO:0097367//carbohydrate derivative binding;GO:0001883//purine nucleoside binding;GO:0036094//small molecule binding;GO:0016740//transferase activity;GO:1901363//heterocyclic compound binding;GO:0032550//purine ribonucleoside binding;GO:0004672//protein kinase activity;GO:0097159//organic cyclic compound binding;GO:001…	GO:0071840//cellular component organization or biogenesis;GO:0044260//cellular macromolecule metabolic process;GO:0019538//protein metabolic process;GO:1902578//single-organism localization;GO:0044237//cellular metabolic process;GO:0006464//cellular protein modification process;GO:0044802//single-organism membrane organization;GO:0044700//single organism signaling;GO:0051716//cellular response to…
TCONS_00055478	0	143.017	0.001	0.41	8.67948	0.00130864	0.027841	yes	MAMSTR	XP_012046016.1 PREDICTED: MEF2-activating motif and SAP domain-containing transcriptional regulator isoform X1 [Ovis aries]	-	-	-	-	GO:0044464//cell part;GO:0043226//organelle;GO:0005622//intracellular;GO:0043227//membrane-bounded organelle;GO:0044424//intracellular part;GO:0043231//intracellular membrane-bounded organelle;GO:0005623//cell;GO:0043229//intracellular organelle	-	GO:0050789//regulation of biological process;GO:0010468//regulation of gene expression;GO:0006357//regulation of transcription from RNA polymerase II promoter;GO:0031326//regulation of cellular biosynthetic process;GO:0051171//regulation of nitrogen compound metabolic process;GO:0031323//regulation of cellular metabolic process;GO:0050794//regulation of cellular process;GO:0060255//regulation of …
TCONS_00055670	140.447	10.44	7.45333	0.273333	-4.76915	0.0018377	0.0360971	yes	SIGLEC14	XP_017918436.1 PREDICTED: LOW QUALITY PROTEIN: sialic acid-binding Ig-like lectin 14 [Capra hircus]	-	-	-	-	-	-	-
TCONS_00055859	48.6167	0	6.14	0.001	-12.584	0.000512269	0.0132911	yes	SLC7A3	ELR47339.1 hypothetical protein M91_03249, partial [Bos mutus]	-	-	-	-	GO:0016020//membrane	-	-
TCONS_00055918	178.663	16.4167	4.41667	0.236667	-4.22203	0.000305077	0.00885777	yes	LILRA5	XP_017918729.1 PREDICTED: leukocyte immunoglobulin-like receptor subfamily A member 6 [Capra hircus]	-	-	-	-	-	-	-
TCONS_00056107	432.383	134.393	5.49667	0.983333	-2.4828	0.00149485	0.0307442	yes	ZNF606	XP_005693087.1 PREDICTED: zinc finger protein 606 [Capra hircus]	-	-	-	-	-	-	-
TCONS_00056218	110.92	83110.8	3.03	1361.64	8.81181	7.52995e-08	7.59996e-06	yes	LPO	XP_017919048.1 PREDICTED: lactoperoxidase isoform X1 [Capra hircus]	Organismal Systems	Digestive system	ko04970//Salivary secretion	K12550	GO:0044421//extracellular region part;GO:0044464//cell part;GO:0016020//membrane;GO:0043226//organelle;GO:0044424//intracellular part;GO:0031988//membrane-bounded vesicle;GO:0043227//membrane-bounded organelle;GO:0005576//extracellular region;GO:0031982//vesicle;GO:0005622//intracellular;GO:0005623//cell	GO:0043169//cation binding;GO:1901363//heterocyclic compound binding;GO:0043167//ion binding;GO:0003824//catalytic activity;GO:0097159//organic cyclic compound binding;GO:0005488//binding;GO:0016209//antioxidant activity;GO:0016491//oxidoreductase activity;GO:0016684//oxidoreductase activity, acting on peroxide as acceptor;GO:0046872//metal ion binding;GO:0004601//peroxidase activity;GO:0046906//…	GO:0006790//sulfur compound metabolic process;GO:0042742//defense response to bacterium;GO:0009617//response to bacterium;GO:0072593//reactive oxygen species metabolic process;GO:0009607//response to biotic stimulus;GO:0098542//defense response to other organism;GO:0006952//defense response;GO:0051707//response to other organism;GO:0044237//cellular metabolic process;GO:0043207//response to exter…
TCONS_00056283	164.753	0.02	2.45	0.001	-11.2586	0.00148427	0.0305714	yes	INTS2	XP_004012470.2 PREDICTED: integrator complex subunit 2 isoform X2 [Ovis aries]	-	-	-	-	GO:0032991//macromolecular complex;GO:0043234//protein complex;GO:0044464//cell part;GO:0005623//cell	-	GO:0071704//organic substance metabolic process;GO:0044260//cellular macromolecule metabolic process;GO:0008152//metabolic process;GO:0006725//cellular aromatic compound metabolic process;GO:0006807//nitrogen compound metabolic process;GO:0016073//snRNA metabolic process;GO:0009987//cellular process;GO:0034641//cellular nitrogen compound metabolic process;GO:0090304//nucleic acid metabolic proces…
TCONS_00056367	171.603	3.30333	2.62333	0.03	-6.45029	0.000115844	0.00415153	yes	SLFN12	XP_012040706.1 PREDICTED: schlafen family member 12 [Ovis aries]	-	-	-	-	-	-	-
TCONS_00056399	545.763	69.33	32.3033	2.63667	-3.6149	0.000115234	0.00413299	yes	Crlf3	XP_017919752.1 PREDICTED: cytokine receptor-like factor 3 [Capra hircus]	-	-	-	-	GO:0005623//cell;GO:0005622//intracellular;GO:0044464//cell part;GO:0044424//intracellular part	-	GO:0031326//regulation of cellular biosynthetic process;GO:0080090//regulation of primary metabolic process;GO:1903047//mitotic cell cycle process;GO:0009966//regulation of signal transduction;GO:0050789//regulation of biological process;GO:0006357//regulation of transcription from RNA polymerase II promoter;GO:2001141//regulation of RNA biosynthetic process;GO:1904892//regulation of STAT cascade…
TCONS_00056402	704.353	121.72	20.12	2.14	-3.23295	1.90127e-05	0.000916853	yes	CRLF3	XP_005896753.1 PREDICTED: cytokine receptor-like factor 3 [Bos mutus]	-	-	-	-	GO:0005622//intracellular;GO:0044424//intracellular part;GO:0044464//cell part;GO:0005623//cell	-	GO:0040008//regulation of growth;GO:0010556//regulation of macromolecule biosynthetic process;GO:0001558//regulation of cell growth;GO:0051726//regulation of cell cycle;GO:2001141//regulation of RNA biosynthetic process;GO:1904892//regulation of STAT cascade;GO:0022402//cell cycle process;GO:0010468//regulation of gene expression;GO:0031326//regulation of cellular biosynthetic process;GO:1903047/…
TCONS_00056464	86.6067	0.666667	1.76	0.01	-7.45943	0.000293581	0.00858336	yes	Foxn1	XP_017919786.1 PREDICTED: forkhead box protein N1 isoform X2 [Capra hircus]	-	-	-	-	-	-	-
TCONS_00056558	236.687	0	5.07667	0.001	-12.3097	7.72372e-05	0.00299202	yes	RPA1	XP_017919891.1 PREDICTED: replication protein A 70 kDa DNA-binding subunit [Capra hircus]	Genetic Information Processing	Replication and repair	ko03420//Nucleotide excision repair;ko03460//Fanconi anemia pathway;ko03440//Homologous recombination;ko03030//DNA replication;ko03430//Mismatch repair	K07466	GO:0005694//chromosome;GO:0005634//nucleus;GO:0044427//chromosomal part;GO:0032991//macromolecular complex;GO:0043234//protein complex;GO:0070013//intracellular organelle lumen;GO:0044451//nucleoplasm part;GO:0031974//membrane-enclosed lumen;GO:0005856//cytoskeleton;GO:0043226//organelle;GO:0000228//nuclear chromosome;GO:0043228//non-membrane-bounded organelle;GO:0005622//intracellular;GO:0043227…	GO:0043566//structure-specific DNA binding;GO:0005488//binding;GO:0097159//organic cyclic compound binding;GO:0003677//DNA binding;GO:0003676//nucleic acid binding;GO:1901363//heterocyclic compound binding	GO:0042592//homeostatic process;GO:0034641//cellular nitrogen compound metabolic process;GO:0048731//system development;GO:0032501//multicellular organismal process;GO:0048534//hematopoietic or lymphoid organ development;GO:0006139//nucleobase-containing compound metabolic process;GO:0051716//cellular response to stimulus;GO:0009790//embryo development;GO:0006950//response to stress;GO:0033554//c…
TCONS_00056798	424.27	0	3.53	0.001	-11.7855	0.000271607	0.00807612	yes	KDM6B	XP_017920085.1 PREDICTED: LOW QUALITY PROTEIN: lysine-specific demethylase 6B [Capra hircus]	-	-	-	-	GO:0005623//cell;GO:0044424//intracellular part;GO:0044446//intracellular organelle part;GO:0044422//organelle part;GO:0043227//membrane-bounded organelle;GO:0044464//cell part;GO:0031974//membrane-enclosed lumen;GO:0070013//intracellular organelle lumen;GO:0044428//nuclear part;GO:0005622//intracellular;GO:0005634//nucleus;GO:0043229//intracellular organelle;GO:0031981//nuclear lumen;GO:0043226/…	GO:0005515//protein binding;GO:0003677//DNA binding;GO:0003676//nucleic acid binding;GO:1901363//heterocyclic compound binding;GO:0032451//demethylase activity;GO:0043169//cation binding;GO:0097159//organic cyclic compound binding;GO:0016491//oxidoreductase activity;GO:0043167//ion binding;GO:0032452//histone demethylase activity;GO:0005488//binding;GO:0003824//catalytic activity	GO:1902589//single-organism organelle organization;GO:0070887//cellular response to chemical stimulus;GO:0006325//chromatin organization;GO:0010468//regulation of gene expression;GO:0016043//cellular component organization;GO:0006464//cellular protein modification process;GO:0042221//response to chemical;GO:1901701//cellular response to oxygen-containing compound;GO:0050896//response to stimulus;…
TCONS_00056800	1075.2	255.263	10.8133	1.64333	-2.71811	0.000609338	0.0153316	yes	KDM6B	XP_017920085.1 PREDICTED: LOW QUALITY PROTEIN: lysine-specific demethylase 6B [Capra hircus]	-	-	-	-	GO:0044464//cell part;GO:0043231//intracellular membrane-bounded organelle;GO:0043226//organelle;GO:0043233//organelle lumen;GO:0005623//cell;GO:0044422//organelle part;GO:0031974//membrane-enclosed lumen;GO:0031981//nuclear lumen;GO:0043227//membrane-bounded organelle;GO:0044428//nuclear part;GO:0005622//intracellular;GO:0043229//intracellular organelle;GO:0044424//intracellular part;GO:0044446/…	GO:0003824//catalytic activity;GO:0043167//ion binding;GO:0016491//oxidoreductase activity;GO:1901363//heterocyclic compound binding;GO:0003677//DNA binding;GO:0005515//protein binding;GO:0003676//nucleic acid binding;GO:0032452//histone demethylase activity;GO:0097159//organic cyclic compound binding;GO:0005488//binding;GO:0043169//cation binding;GO:0032451//demethylase activity	GO:0009888//tissue development;GO:0050794//regulation of cellular process;GO:0031326//regulation of cellular biosynthetic process;GO:0060429//epithelium development;GO:0006950//response to stress;GO:0072358//cardiovascular system development;GO:0048731//system development;GO:0006355//regulation of transcription, DNA-templated;GO:0044767//single-organism developmental process;GO:0007275//multicell…
TCONS_00057113	179.673	0	2.07	0.001	-11.0154	2.44479e-05	0.00112881	yes	COL1A1	XP_005964709.1 PREDICTED: collagen alpha-1(I) chain-like [Pantholops hodgsonii]	Organismal Systems;Environmental Information Processing;Cellular Processes	Signaling molecules and interaction;Signal transduction;Immune system;Cellular commiunity;Digestive system	ko04151//PI3K-Akt signaling pathway;ko04510//Focal adhesion;ko04611//Platelet activation;ko04974//Protein digestion and absorption;ko04512//ECM-receptor interaction	K06236	GO:0098643//banded collagen fibril;GO:0044464//cell part;GO:0032991//macromolecular complex;GO:0005578//proteinaceous extracellular matrix;GO:0005583//fibrillar collagen trimer;GO:0005622//intracellular;GO:0005581//collagen trimer;GO:0044420//extracellular matrix component;GO:0005576//extracellular region;GO:0005623//cell;GO:0044424//intracellular part;GO:0044421//extracellular region part;GO:004…	GO:0019838//growth factor binding;GO:0005198//structural molecule activity;GO:0005515//protein binding;GO:0043167//ion binding;GO:0043169//cation binding;GO:0005488//binding	GO:0048646//anatomical structure formation involved in morphogenesis;GO:2000145//regulation of cell motility;GO:0048522//positive regulation of cellular process;GO:0050954//sensory perception of mechanical stimulus;GO:0044085//cellular component biogenesis;GO:0023051//regulation of signaling;GO:0031214//biomineral tissue development;GO:0007600//sensory perception;GO:0003008//system process;GO:001…
TCONS_00057120	2483.17	778.007	60.75	12.1933	-2.31679	0.00116256	0.0254029	yes	PPP1R9B	XP_014938835.1 PREDICTED: LOW QUALITY PROTEIN: neurabin-1-like [Acinonyx jubatus]	-	-	-	-	GO:0044444//cytoplasmic part;GO:0031253//cell projection membrane;GO:0005737//cytoplasm;GO:0030863//cortical cytoskeleton;GO:0098805//whole membrane;GO:0044463//cell projection part;GO:0016020//membrane;GO:0043227//membrane-bounded organelle;GO:0043229//intracellular organelle;GO:0044448//cell cortex part;GO:0043231//intracellular membrane-bounded organelle;GO:0044428//nuclear part;GO:0005938//ce…	GO:0019903//protein phosphatase binding;GO:0019902//phosphatase binding;GO:0005488//binding;GO:0019899//enzyme binding;GO:0008092//cytoskeletal protein binding;GO:0005515//protein binding	GO:0050794//regulation of cellular process;GO:0008277//regulation of G-protein coupled receptor protein signaling pathway;GO:0007010//cytoskeleton organization;GO:0022607//cellular component assembly;GO:0050896//response to stimulus;GO:0014072//response to isoquinoline alkaloid;GO:0006996//organelle organization;GO:0051716//cellular response to stimulus;GO:0048870//cell motility;GO:0008283//cell …
TCONS_00057132	1160.64	77.16	34.72	1.54	-4.49476	8.65253e-07	6.58332e-05	yes	FAM117A	XP_017920394.1 PREDICTED: protein FAM117A [Capra hircus]	-	-	-	-	-	-	-
TCONS_00057526	2045.29	177.077	32.7567	1.91667	-4.09512	1.48728e-05	0.00074548	yes	Fmnl1	XP_017920754.1 PREDICTED: formin-like protein 1 isoform X2 [Capra hircus]	-	-	-	-	-	-	-
TCONS_00057679	260.35	25.1733	16.5	0.87	-4.24531	0.000848918	0.0198452	yes	Sectm1a	XP_014954381.1 PREDICTED: secreted and transmembrane protein 1A-like isoform X2 [Ovis aries]	Organismal Systems	Immune system	ko04640//Hematopoietic cell lineage	K06457	-	-	-
TCONS_00057836	776.053	26.6933	16.1267	0.393333	-5.35755	2.6113e-05	0.00119331	yes	TMC6	XP_017919186.1 PREDICTED: transmembrane channel-like protein 6 isoform X5 [Capra hircus]	-	-	-	-	-	-	-
TCONS_00058103	398.687	99.09	2.56333	0.356667	-2.84537	0.00157704	0.0320961	yes	ABCA5	XP_017919405.1 PREDICTED: ATP-binding cassette sub-family A member 5 isoform X2 [Capra hircus]	Environmental Information Processing	Membrane transport	ko02010//ABC transporters	K05648	-	-	-
TCONS_00058281	1099.15	329.723	15.8367	2.62	-2.59563	0.000400192	0.01105	yes	SRSF1	XP_003912847.1 PREDICTED: serine/arginine-rich splicing factor 1 [Papio anubis]	Genetic Information Processing	Transcription	ko03040//Spliceosome	K12890	GO:0005622//intracellular;GO:0005681//spliceosomal complex;GO:0043227//membrane-bounded organelle;GO:0030529//intracellular ribonucleoprotein complex;GO:0005654//nucleoplasm;GO:0043231//intracellular membrane-bounded organelle;GO:1990904//ribonucleoprotein complex;GO:0043234//protein complex;GO:0044422//organelle part;GO:0031982//vesicle;GO:0044428//nuclear part;GO:0043233//organelle lumen;GO:004…	GO:1901363//heterocyclic compound binding;GO:0005488//binding;GO:0019904//protein domain specific binding;GO:0097159//organic cyclic compound binding;GO:0003676//nucleic acid binding;GO:0005515//protein binding;GO:0044822//poly(A) RNA binding;GO:0003723//RNA binding	GO:0071704//organic substance metabolic process;GO:0031323//regulation of cellular metabolic process;GO:0009059//macromolecule biosynthetic process;GO:0006807//nitrogen compound metabolic process;GO:0015931//nucleobase-containing compound transport;GO:0022607//cellular component assembly;GO:0043009//chordate embryonic development;GO:0097659//nucleic acid-templated transcription;GO:0006913//nucleo…
TCONS_00058288	1691.9	4.33333	57.8567	0.08	-9.49827	7.94303e-06	0.000431893	yes	MPO	XP_017919060.1 PREDICTED: myeloperoxidase isoform X1 [Capra hircus]	Cellular Processes	Transport and catabolism	ko04145//Phagosome	K10789	GO:0043226//organelle;GO:0043231//intracellular membrane-bounded organelle;GO:0005576//extracellular region;GO:0000323//lytic vacuole;GO:0005622//intracellular;GO:0044421//extracellular region part;GO:0005773//vacuole;GO:0005764//lysosome;GO:0031988//membrane-bounded vesicle;GO:0031982//vesicle;GO:0005766//primary lysosome;GO:0044424//intracellular part;GO:0044464//cell part;GO:0044444//cytoplasm…	GO:0046906//tetrapyrrole binding;GO:0016209//antioxidant activity;GO:0005539//glycosaminoglycan binding;GO:0097159//organic cyclic compound binding;GO:0097367//carbohydrate derivative binding;GO:0005488//binding;GO:1901363//heterocyclic compound binding	GO:0034367//macromolecular complex remodeling;GO:0002148//hypochlorous acid metabolic process;GO:0072593//reactive oxygen species metabolic process;GO:0042743//hydrogen peroxide metabolic process;GO:0006082//organic acid metabolic process;GO:0043207//response to external biotic stimulus;GO:0051704//multi-organism process;GO:0071825//protein-lipid complex subunit organization;GO:0009987//cellular …
TCONS_00058293	669.503	23.17	4.91667	0.106667	-5.5265	2.0417e-09	3.50365e-07	yes	BZRAP1	XP_017919604.1 PREDICTED: peripheral-type benzodiazepine receptor-associated protein 1 isoform X2 [Capra hircus]	-	-	-	-	GO:0043227//membrane-bounded organelle;GO:0044464//cell part;GO:0043231//intracellular membrane-bounded organelle;GO:0044424//intracellular part;GO:0005623//cell;GO:0043226//organelle;GO:0005622//intracellular;GO:0043229//intracellular organelle	GO:0005488//binding;GO:0005515//protein binding;GO:0005102//receptor binding	-
TCONS_00058377	0	255.47	0.001	1.35	10.3987	0.000179026	0.00580079	yes	ACACA	XP_017919660.1 PREDICTED: acetyl-CoA carboxylase 1 isoform X3 [Capra hircus]	Environmental Information Processing;Metabolism;Organismal Systems	Signal transduction;Global and Overview;Carbohydrate metabolism;Lipid metabolism;Endocrine system	ko01100//Metabolic pathways;ko04910//Insulin signaling pathway;ko04152//AMPK signaling pathway;ko01110//Biosynthesis of secondary metabolites;ko04922//Glucagon signaling pathway;ko01212//Fatty acid metabolism;ko00620//Pyruvate metabolism;ko00640//Propanoate metabolism;ko00061//Fatty acid biosynthesis	K11262	GO:0043229//intracellular organelle;GO:0043226//organelle;GO:0005623//cell;GO:0043227//membrane-bounded organelle;GO:0044424//intracellular part;GO:0005622//intracellular;GO:0043231//intracellular membrane-bounded organelle;GO:0005737//cytoplasm;GO:0044444//cytoplasmic part;GO:0031988//membrane-bounded vesicle;GO:0044464//cell part;GO:0031982//vesicle	GO:0016879//ligase activity, forming carbon-nitrogen bonds;GO:0001882//nucleoside binding;GO:0032550//purine ribonucleoside binding;GO:0003824//catalytic activity;GO:0097367//carbohydrate derivative binding;GO:1901363//heterocyclic compound binding;GO:0097159//organic cyclic compound binding;GO:0001883//purine nucleoside binding;GO:0036094//small molecule binding;GO:0016874//ligase activity;GO:00…	GO:0015937//coenzyme A biosynthetic process;GO:1901576//organic substance biosynthetic process;GO:0051186//cofactor metabolic process;GO:0019693//ribose phosphate metabolic process;GO:0043170//macromolecule metabolic process;GO:0009150//purine ribonucleotide metabolic process;GO:0006139//nucleobase-containing compound metabolic process;GO:0015936//coenzyme A metabolic process;GO:0006461//protein …
TCONS_00058385	0	110.043	0.001	0.53	9.04985	0.00264713	0.047644	yes	ACACA	XP_017919657.1 PREDICTED: acetyl-CoA carboxylase 1 isoform X1 [Capra hircus]	Environmental Information Processing;Metabolism;Organismal Systems	Global and Overview;Carbohydrate metabolism;Signal transduction;Endocrine system;Lipid metabolism	ko01100//Metabolic pathways;ko04910//Insulin signaling pathway;ko04152//AMPK signaling pathway;ko01110//Biosynthesis of secondary metabolites;ko04922//Glucagon signaling pathway;ko01212//Fatty acid metabolism;ko00620//Pyruvate metabolism;ko00640//Propanoate metabolism;ko00061//Fatty acid biosynthesis	K11262	GO:0043231//intracellular membrane-bounded organelle;GO:0043227//membrane-bounded organelle;GO:0044464//cell part;GO:0005622//intracellular;GO:0031982//vesicle;GO:0005623//cell;GO:0043229//intracellular organelle;GO:0044424//intracellular part;GO:0031988//membrane-bounded vesicle;GO:0044444//cytoplasmic part;GO:0005737//cytoplasm;GO:0043226//organelle	GO:0016885//ligase activity, forming carbon-carbon bonds;GO:0001883//purine nucleoside binding;GO:0043169//cation binding;GO:0016879//ligase activity, forming carbon-nitrogen bonds;GO:0005488//binding;GO:0032549//ribonucleoside binding;GO:0016421//CoA carboxylase activity;GO:0001882//nucleoside binding;GO:0036094//small molecule binding;GO:0097159//organic cyclic compound binding;GO:0097367//carb…	GO:0046390//ribose phosphate biosynthetic process;GO:0034033//purine nucleoside bisphosphate biosynthetic process;GO:0044085//cellular component biogenesis;GO:0006461//protein complex assembly;GO:0006793//phosphorus metabolic process;GO:0090407//organophosphate biosynthetic process;GO:1901135//carbohydrate derivative metabolic process;GO:0015936//coenzyme A metabolic process;GO:0009987//cellular …
TCONS_00058613	44.3033	0	0.85	0.001	-9.73132	0.000973518	0.022244	yes	GIT1	XP_017919837.1 PREDICTED: ARF GTPase-activating protein GIT1 isoform X3 [Capra hircus]	Cellular Processes	Cell motility;Transport and catabolism	ko04144//Endocytosis;ko04810//Regulation of actin cytoskeleton	K05737	GO:0030054//cell junction;GO:0005622//intracellular;GO:0044424//intracellular part;GO:0005737//cytoplasm;GO:0005924//cell-substrate adherens junction;GO:0016234//inclusion body;GO:0044444//cytoplasmic part;GO:0070161//anchoring junction;GO:0005623//cell;GO:0044464//cell part;GO:0005912//adherens junction;GO:0030055//cell-substrate junction	GO:0016772//transferase activity, transferring phosphorus-containing groups;GO:0046914//transition metal ion binding;GO:0005488//binding;GO:0008047//enzyme activator activity;GO:0043169//cation binding;GO:0016740//transferase activity;GO:0046872//metal ion binding;GO:0043167//ion binding;GO:0003824//catalytic activity;GO:0030234//enzyme regulator activity;GO:0098772//molecular function regulator	GO:0007165//signal transduction;GO:0032502//developmental process;GO:0051336//regulation of hydrolase activity;GO:0043087//regulation of GTPase activity;GO:0097485//neuron projection guidance;GO:0042221//response to chemical;GO:0019222//regulation of metabolic process;GO:0023052//signaling;GO:0065009//regulation of molecular function;GO:0071840//cellular component organization or biogenesis;GO:00…
TCONS_00058828	0	147.823	0.001	1.33667	10.3844	0.00110139	0.0243774	yes	MINK1	XP_011978144.1 PREDICTED: misshapen-like kinase 1 isoform X8 [Ovis aries musimon]	-	-	-	-	-	-	-
TCONS_00058890	592.337	65.28	19.3067	1.35333	-3.83451	8.67534e-05	0.00326683	yes	PHF23	XP_017920043.1 PREDICTED: PHD finger protein 23 [Capra hircus]	-	-	-	-	-	GO:0043167//ion binding;GO:0043169//cation binding;GO:0005488//binding	-
TCONS_00058947	71.0433	1818.8	1.24667	16.9467	3.76485	0.000115975	0.00415291	yes	PER1	XP_017920102.1 PREDICTED: period circadian protein homolog 1 isoform X2 [Capra hircus]	Organismal Systems	Environmental adaptation	ko04713//Circadian entrainment;ko04710//Circadian rhythm	K02633	GO:0044464//cell part;GO:0043226//organelle;GO:0005623//cell;GO:0005622//intracellular;GO:0043229//intracellular organelle;GO:0044424//intracellular part;GO:0043231//intracellular membrane-bounded organelle;GO:0043227//membrane-bounded organelle	GO:1901363//heterocyclic compound binding;GO:0000988//transcription factor activity, protein binding;GO:0005515//protein binding;GO:0001067//regulatory region nucleic acid binding;GO:0019899//enzyme binding;GO:0003682//chromatin binding;GO:0044877//macromolecular complex binding;GO:0043565//sequence-specific DNA binding;GO:0001012//RNA polymerase II regulatory region DNA binding;GO:0044389//ubiqu…	GO:0044699//single-organism process;GO:0051246//regulation of protein metabolic process;GO:0006476//protein deacetylation;GO:0006325//chromatin organization;GO:0006357//regulation of transcription from RNA polymerase II promoter;GO:0006355//regulation of transcription, DNA-templated;GO:0043170//macromolecule metabolic process;GO:0010556//regulation of macromolecule biosynthetic process;GO:0050896…
TCONS_00059307	543.66	23.3567	6.78	0.206667	-5.03591	9.1122e-06	0.00048573	yes	ITGA3	XP_005964715.1 PREDICTED: integrin alpha-3 [Pantholops hodgsonii]	Cellular Processes;Environmental Information Processing;Organismal Systems	Immune system;Cellular commiunity;Signaling molecules and interaction;Cell motility;Signal transduction	ko04151//PI3K-Akt signaling pathway;ko04810//Regulation of actin cytoskeleton;ko04510//Focal adhesion;ko04640//Hematopoietic cell lineage;ko04512//ECM-receptor interaction	K06482	GO:0031982//vesicle;GO:0043226//organelle;GO:0016021//integral component of membrane;GO:0098797//plasma membrane protein complex;GO:0044464//cell part;GO:0031226//intrinsic component of plasma membrane;GO:0071944//cell periphery;GO:0043235//receptor complex;GO:0098805//whole membrane;GO:0042995//cell projection;GO:0070161//anchoring junction;GO:0005912//adherens junction;GO:0032991//macromolecula…	GO:0043167//ion binding;GO:0019899//enzyme binding;GO:0005515//protein binding;GO:0046983//protein dimerization activity;GO:0043169//cation binding;GO:0005488//binding	GO:0050890//cognition;GO:0090092//regulation of transmembrane receptor protein serine/threonine kinase signaling pathway;GO:0048518//positive regulation of biological process;GO:0048522//positive regulation of cellular process;GO:0003008//system process;GO:0050794//regulation of cellular process;GO:0022610//biological adhesion;GO:0030154//cell differentiation;GO:0032501//multicellular organismal …
TCONS_00059481	1727.59	30.9667	23.96	0.25	-6.58256	5.89159e-15	4.68276e-12	yes	TOP2A	XP_012041459.1 PREDICTED: DNA topoisomerase 2-alpha isoform X2 [Ovis aries]	-	-	-	-	-	-	-
TCONS_00059674	339.21	0	3.60667	0.001	-11.8165	1.62812e-12	7.00215e-10	yes	BRCA1	XP_017920655.1 PREDICTED: breast cancer type 1 susceptibility protein isoform X2 [Capra hircus]	Environmental Information Processing;Genetic Information Processing	Replication and repair;Folding, sorting and degradation;Signal transduction	ko04151//PI3K-Akt signaling pathway;ko04120//Ubiquitin mediated proteolysis;ko03460//Fanconi anemia pathway	K10605	-	-	-
TCONS_00059856	1153.29	34.6333	68.16	1.42667	-5.57821	8.01527e-06	0.000434014	yes	LIMD2	XP_012041700.1 PREDICTED: LIM domain-containing protein 2 [Ovis aries]	-	-	-	-	-	-	-
TCONS_00059888	394.807	77.6467	10.21	1.14333	-3.15866	0.000240108	0.0073401	yes	ICAM2	XP_017919507.1 PREDICTED: intercellular adhesion molecule 2-like [Capra hircus]	Organismal Systems;Environmental Information Processing	Immune system;Signaling molecules and interaction	ko04514//Cell adhesion molecules (CAMs);ko04650//Natural killer cell mediated cytotoxicity	K06523	-	-	-
TCONS_00059962	245.563	14.6	2.49667	0.103333	-4.59463	0.00101656	0.0229798	yes	PITPNC1	XP_013827722.1 PREDICTED: cytoplasmic phosphatidylinositol transfer protein 1 isoform X4 [Capra hircus]	-	-	-	-	-	-	-
TCONS_00060037	50.18	0	0.47	0.001	-8.87652	0.000465286	0.0123445	yes	CCDC137	XP_004013123.1 PREDICTED: coiled-coil domain-containing protein 137 [Ovis aries]	-	-	-	-	-	-	-
TCONS_00060098	6805.9	1611.11	30.1433	3.9	-2.95029	0.000270522	0.00805953	yes	RNF213	XP_013827796.2 PREDICTED: E3 ubiquitin-protein ligase RNF213 isoform X3 [Capra hircus]	-	-	-	-	-	-	-
TCONS_00060140	67.3233	0	2.14	0.001	-11.0634	0.00156357	0.0318657	yes	C1QTNF1	XP_017919153.1 PREDICTED: complement C1q tumor necrosis factor-related protein 1 [Capra hircus]	-	-	-	-	-	-	-
TCONS_00060205	1099.36	14.4067	20.8967	0.193333	-6.75604	3.83663e-08	4.24797e-06	yes	SEPT9	XP_010854539.1 PREDICTED: septin-9 isoform X4 [Bison bison bison]	-	-	-	-	-	-	-
TCONS_00060576	924.633	69.5567	10.65	0.516667	-4.36548	0.000669146	0.0164642	yes	NEURL1B	XP_014944221.1 PREDICTED: E3 ubiquitin-protein ligase NEURL1B isoform X2 [Ovis aries musimon]	-	-	-	-	-	-	-
TCONS_00060696	53.87	0	0.56	0.001	-9.12928	0.000292133	0.00856146	yes	ADAMTS6	XP_004016986.1 PREDICTED: A disintegrin and metalloproteinase with thrombospondin motifs 6 isoform X1 [Ovis aries]	-	-	-	-	-	-	-
TCONS_00060697	56.2233	0	0.596667	0.001	-9.22078	0.000221239	0.00687183	yes	ADAMTS6	XP_004016986.1 PREDICTED: A disintegrin and metalloproteinase with thrombospondin motifs 6 isoform X1 [Ovis aries]	-	-	-	-	-	-	-
TCONS_00061101	4.46	3456.84	0.42	171.307	8.67198	0.000723754	0.0175173	yes	-	XP_010796655.1 PREDICTED: odorant-binding protein-like [Bos taurus]	-	-	-	-	-	-	-
TCONS_00061676	686.403	243.187	4.07	0.816667	-2.31721	0.00225424	0.0421227	yes	OTULIN	XP_014924341.1 PREDICTED: ubiquitin thioesterase otulin isoform X3 [Acinonyx jubatus]	-	-	-	-	-	-	-
TCONS_00061931	0	1599.56	0.001	5.7	12.4767	6.48955e-18	1.1554e-14	yes	AKAP13	XP_017921494.1 PREDICTED: A-kinase anchor protein 13 isoform X4 [Capra hircus]	-	-	-	-	-	-	-
TCONS_00062001	616.797	0.326667	10.5833	0.00333333	-11.6325	2.8468e-14	1.8634e-11	yes	SEMA4B	XP_017921738.1 PREDICTED: semaphorin-4B [Capra hircus]	Organismal Systems	Development	ko04360//Axon guidance	K06521	-	-	-
TCONS_00062120	1038.58	24.9467	29.8633	0.496667	-5.90995	2.98869e-09	4.85498e-07	yes	IL16	XP_013828519.2 PREDICTED: pro-interleukin-16 isoform X2 [Capra hircus]	-	-	-	-	GO:0016020//membrane;GO:0043231//intracellular membrane-bounded organelle;GO:0043227//membrane-bounded organelle;GO:0005622//intracellular;GO:0044424//intracellular part;GO:0005623//cell;GO:0044464//cell part;GO:0043226//organelle;GO:0043229//intracellular organelle	-	GO:0006928//movement of cell or subcellular component;GO:0032101//regulation of response to external stimulus;GO:0048520//positive regulation of behavior;GO:0050920//regulation of chemotaxis;GO:0040017//positive regulation of locomotion;GO:0050789//regulation of biological process;GO:0050795//regulation of behavior;GO:0016477//cell migration;GO:0040011//locomotion;GO:0048870//cell motility;GO:004…
TCONS_00062173	77.9267	0	1.06667	0.001	-10.0589	3.30086e-05	0.00146045	yes	ADAMTS7	XP_017921614.1 PREDICTED: A disintegrin and metalloproteinase with thrombospondin motifs 7 [Capra hircus]	-	-	-	-	GO:0005623//cell;GO:0031012//extracellular matrix;GO:0044464//cell part	GO:0003824//catalytic activity;GO:0046914//transition metal ion binding;GO:0046872//metal ion binding;GO:0005488//binding;GO:0008233//peptidase activity;GO:0016787//hydrolase activity;GO:0070011//peptidase activity, acting on L-amino acid peptides;GO:0043169//cation binding;GO:0043167//ion binding	GO:0032330//regulation of chondrocyte differentiation;GO:0010033//response to organic substance;GO:0043170//macromolecule metabolic process;GO:0070555//response to interleukin-1;GO:0008152//metabolic process;GO:0050793//regulation of developmental process;GO:2000026//regulation of multicellular organismal development;GO:0071704//organic substance metabolic process;GO:0009987//cellular process;GO:…
TCONS_00062727	131.933	3.24	2.55333	0.0466667	-5.77385	0.00193661	0.0375592	yes	EVL	XP_017921524.1 PREDICTED: ena/VASP-like protein isoform X3 [Capra hircus]	-	-	-	-	GO:0031252//cell leading edge;GO:0043228//non-membrane-bounded organelle;GO:0005623//cell;GO:0043229//intracellular organelle;GO:0030054//cell junction;GO:0070161//anchoring junction;GO:0044424//intracellular part;GO:0005912//adherens junction;GO:0005924//cell-substrate adherens junction;GO:0005622//intracellular;GO:0043232//intracellular non-membrane-bounded organelle;GO:0030055//cell-substrate …	GO:0019904//protein domain specific binding;GO:0005488//binding;GO:0005515//protein binding	GO:0051129//negative regulation of cellular component organization;GO:0043254//regulation of protein complex assembly;GO:0032233//positive regulation of actin filament bundle assembly;GO:0051493//regulation of cytoskeleton organization;GO:0051130//positive regulation of cellular component organization;GO:0032231//regulation of actin filament bundle assembly;GO:0051270//regulation of cellular comp…
TCONS_00062733	913.257	4.41667	24.0267	0.0766667	-8.29182	4.4128e-13	2.23197e-10	yes	EVL	XP_017921522.1 PREDICTED: ena/VASP-like protein isoform X1 [Capra hircus]	-	-	-	-	GO:0005912//adherens junction;GO:0043232//intracellular non-membrane-bounded organelle;GO:0005623//cell;GO:0005924//cell-substrate adherens junction;GO:0070161//anchoring junction;GO:0044464//cell part;GO:0030054//cell junction;GO:0005622//intracellular;GO:0043229//intracellular organelle;GO:0043226//organelle;GO:0030055//cell-substrate junction;GO:0044424//intracellular part;GO:0031252//cell lea…	GO:0005488//binding;GO:0005515//protein binding;GO:0019904//protein domain specific binding	GO:0065007//biological regulation;GO:0065008//regulation of biological quality;GO:0051270//regulation of cellular component movement;GO:0044087//regulation of cellular component biogenesis;GO:0051495//positive regulation of cytoskeleton organization;GO:0032233//positive regulation of actin filament bundle assembly;GO:0048522//positive regulation of cellular process;GO:0048518//positive regulation…
TCONS_00062992	960.783	0	46.9433	0.001	-15.5186	2.6853e-07	2.30294e-05	yes	Ighv3-6	XP_006039907.1 PREDICTED: uncharacterized protein LOC102396580, partial [Bubalus bubalis]	-	-	-	-	-	-	-
TCONS_00062998	8579.69	292970	559.57	9867.49	4.14029	0.000143573	0.00490065	yes	IGHA1	AMP34155.1 immunoglobulin alpha heavy chain, partial [Capra hircus]	Organismal Systems;Environmental Information Processing;Cellular Processes	Signal transduction;Immune system;Transport and catabolism	ko04151//PI3K-Akt signaling pathway;ko04020//Calcium signaling pathway;ko04650//Natural killer cell mediated cytotoxicity;ko04072//Phospholipase D signaling pathway;ko04145//Phagosome;ko04064//NF-kappa B signaling pathway;ko04666//Fc gamma R-mediated phagocytosis;ko04640//Hematopoietic cell lineage;ko04662//B cell receptor signaling pathway;ko04664//Fc epsilon RI signaling pathway;ko04672//Intest…	K06856	GO:0043227//membrane-bounded organelle;GO:0005576//extracellular region;GO:0043226//organelle;GO:0005615//extracellular space;GO:0071749//polymeric IgA immunoglobulin complex;GO:0071750//dimeric IgA immunoglobulin complex;GO:0019814//immunoglobulin complex;GO:0031982//vesicle;GO:0043234//protein complex;GO:0071746//IgA immunoglobulin complex, circulating;GO:0031988//membrane-bounded vesicle;GO:00…	GO:0005515//protein binding;GO:0005488//binding;GO:0005102//receptor binding	GO:0051707//response to other organism;GO:0003014//renal system process;GO:0009607//response to biotic stimulus;GO:0097205//renal filtration;GO:0051234//establishment of localization;GO:0051179//localization;GO:0050789//regulation of biological process;GO:0065007//biological regulation;GO:0006897//endocytosis;GO:0003008//system process;GO:0006810//transport;GO:0098542//defense response to other o…
TCONS_00063167	1491.38	200.813	27.3833	2.64333	-3.37287	0.000311715	0.00901523	yes	MYADM	XP_014957263.1 PREDICTED: myeloid-associated differentiation marker-like [Ovis aries]	-	-	-	-	-	-	-
TCONS_00063363	421.043	82.4667	21.9333	2.79	-2.97479	0.00102263	0.0230702	yes	CTSH	NP_001301092.1 pro-cathepsin H precursor [Capra hircus]	Cellular Processes	Transport and catabolism	ko04142//Lysosome	K01366	GO:0012505//endomembrane system;GO:0043226//organelle;GO:0005622//intracellular;GO:0030141//secretory granule;GO:0044444//cytoplasmic part;GO:0044424//intracellular part;GO:0016023//cytoplasmic, membrane-bounded vesicle;GO:0042599//lamellar body;GO:0031410//cytoplasmic vesicle;GO:0043227//membrane-bounded organelle;GO:0044421//extracellular region part;GO:0005773//vacuole;GO:0005623//cell;GO:0005…	GO:0016505//peptidase activator activity involved in apoptotic process;GO:0005488//binding;GO:0016787//hydrolase activity;GO:0032393//MHC class I receptor activity;GO:0004175//endopeptidase activity;GO:0099600//transmembrane receptor activity;GO:0098772//molecular function regulator;GO:0042562//hormone binding;GO:0060089//molecular transducer activity;GO:0016504//peptidase activator activity;GO:0…	GO:0031323//regulation of cellular metabolic process;GO:0010467//gene expression;GO:0071704//organic substance metabolic process;GO:0048518//positive regulation of biological process;GO:0032270//positive regulation of cellular protein metabolic process;GO:0061138//morphogenesis of a branching epithelium;GO:0043412//macromolecule modification;GO:0023014//signal transduction by protein phosphorylat…
TCONS_00063401	379.183	77.14	3.86333	0.49	-2.97899	0.000710512	0.0172343	yes	TJP1	XP_014957438.1 PREDICTED: tight junction protein ZO-1 isoform X8 [Ovis aries]	Cellular Processes	Cellular commiunity	ko04530//Tight junction;ko04540//Gap junction;ko04520//Adherens junction	K05701	-	-	-
TCONS_00063748	0	256.853	0.001	1.59667	10.6408	1.86785e-07	1.66943e-05	yes	CCDC88C	XP_017921620.1 PREDICTED: protein Daple isoform X2 [Capra hircus]	-	-	-	-	-	GO:0005488//binding;GO:0001071//nucleic acid binding transcription factor activity;GO:0097159//organic cyclic compound binding;GO:0003677//DNA binding;GO:0005515//protein binding;GO:1901363//heterocyclic compound binding;GO:0019904//protein domain specific binding;GO:0003676//nucleic acid binding	GO:0044700//single organism signaling;GO:0051716//cellular response to stimulus;GO:0022607//cellular component assembly;GO:0071822//protein complex subunit organization;GO:0071840//cellular component organization or biogenesis;GO:0007165//signal transduction;GO:0051259//protein oligomerization;GO:0050896//response to stimulus;GO:0065007//biological regulation;GO:0044763//single-organism cellular …
TCONS_00064206	105.207	0	1.13333	0.001	-10.1464	0.000733931	0.0176962	yes	GOLGA4	XP_005695601.2 PREDICTED: golgin subfamily A member 4 isoform X2 [Capra hircus]	-	-	-	-	GO:0005622//intracellular;GO:0044464//cell part;GO:0043226//organelle;GO:0043229//intracellular organelle;GO:0043231//intracellular membrane-bounded organelle;GO:0043227//membrane-bounded organelle;GO:0044424//intracellular part;GO:0005623//cell	GO:0005488//binding;GO:0019899//enzyme binding;GO:0005515//protein binding	GO:0070727//cellular macromolecule localization;GO:0051234//establishment of localization;GO:0033036//macromolecule localization;GO:0034613//cellular protein localization;GO:0071702//organic substance transport;GO:0051649//establishment of localization in cell;GO:0008104//protein localization;GO:0046907//intracellular transport;GO:0015031//protein transport;GO:0045184//establishment of protein lo…
TCONS_00065152	508.91	60.91	7.79	0.51	-3.93305	0.00170926	0.0341775	yes	CCR1	XP_005696099.2 PREDICTED: C-C chemokine receptor type 1 [Capra hircus]	Organismal Systems;Environmental Information Processing	Immune system;Signaling molecules and interaction	ko04060//Cytokine-cytokine receptor interaction;ko04062//Chemokine signaling pathway	K04176	GO:0044425//membrane part;GO:0044459//plasma membrane part;GO:0005623//cell;GO:0071944//cell periphery;GO:0016021//integral component of membrane;GO:0031224//intrinsic component of membrane;GO:0005886//plasma membrane;GO:0016020//membrane;GO:0044464//cell part	GO:0008528//G-protein coupled peptide receptor activity;GO:0060089//molecular transducer activity;GO:0099600//transmembrane receptor activity;GO:0004871//signal transducer activity;GO:0016298//lipase activity;GO:0019956//chemokine binding;GO:0004950//chemokine receptor activity;GO:0001653//peptide receptor activity;GO:0004896//cytokine receptor activity;GO:0004888//transmembrane signaling recepto…	GO:0051246//regulation of protein metabolic process;GO:0050801//ion homeostasis;GO:0060255//regulation of macromolecule metabolic process;GO:0030003//cellular cation homeostasis;GO:0006875//cellular metal ion homeostasis;GO:0030278//regulation of ossification;GO:0050896//response to stimulus;GO:0072503//cellular divalent inorganic cation homeostasis;GO:0051270//regulation of cellular component mo…
TCONS_00065191	709.92	49.4367	3.00667	0.126667	-4.56906	3.66771e-06	0.000220013	yes	Slc6a20	XP_017893813.1 PREDICTED: sodium- and chloride-dependent transporter XTRP3 isoform X1 [Capra hircus]	-	-	-	-	GO:0031224//intrinsic component of membrane;GO:0044425//membrane part;GO:0016020//membrane;GO:0016021//integral component of membrane	GO:0005342//organic acid transmembrane transporter activity;GO:0008509//anion transmembrane transporter activity;GO:0022892//substrate-specific transporter activity;GO:0022857//transmembrane transporter activity;GO:0022804//active transmembrane transporter activity;GO:0005326//neurotransmitter transporter activity;GO:0015075//ion transmembrane transporter activity;GO:0015291//secondary active tra…	GO:0006820//anion transport;GO:0071702//organic substance transport;GO:0015711//organic anion transport;GO:0006812//cation transport;GO:0051234//establishment of localization;GO:0046942//carboxylic acid transport;GO:0044765//single-organism transport;GO:0006811//ion transport;GO:0044699//single-organism process;GO:1902578//single-organism localization;GO:0051179//localization;GO:0006810//transpor…
TCONS_00065440	353.227	0	3.10333	0.001	-11.5996	9.3314e-08	9.18895e-06	yes	CLASP2	XP_017922634.1 PREDICTED: CLIP-associating protein 2 isoform X13 [Capra hircus]	-	-	-	-	GO:0043226//organelle;GO:0015630//microtubule cytoskeleton;GO:0044424//intracellular part;GO:0043232//intracellular non-membrane-bounded organelle;GO:0044422//organelle part;GO:0005622//intracellular;GO:0005874//microtubule;GO:0099512//supramolecular fiber;GO:0044446//intracellular organelle part;GO:0005623//cell;GO:0044430//cytoskeletal part;GO:0044464//cell part;GO:0043229//intracellular organe…	GO:0005515//protein binding;GO:0008092//cytoskeletal protein binding;GO:0015631//tubulin binding;GO:0005488//binding	GO:0032886//regulation of microtubule-based process;GO:0010639//negative regulation of organelle organization;GO:0051493//regulation of cytoskeleton organization;GO:0044763//single-organism cellular process;GO:0033043//regulation of organelle organization;GO:0051179//localization;GO:0050794//regulation of cellular process;GO:0009987//cellular process;GO:0031110//regulation of microtubule polymeri…
TCONS_00065664	4397.32	1385.51	53.4933	10.95	-2.28843	0.00142328	0.0295443	yes	EDEM1	XP_012026064.1 PREDICTED: ER degradation-enhancing alpha-mannosidase-like protein 1 isoform X2 [Ovis aries musimon]	Genetic Information Processing	Folding, sorting and degradation	ko04141//Protein processing in endoplasmic reticulum	K10084	GO:0042175//nuclear outer membrane-endoplasmic reticulum membrane network;GO:0005622//intracellular;GO:0043226//organelle;GO:0043231//intracellular membrane-bounded organelle;GO:0031090//organelle membrane;GO:0031227//intrinsic component of endoplasmic reticulum membrane;GO:0044446//intracellular organelle part;GO:0044444//cytoplasmic part;GO:0005789//endoplasmic reticulum membrane;GO:0044464//ce…	GO:0016798//hydrolase activity, acting on glycosyl bonds;GO:0003824//catalytic activity;GO:0015923//mannosidase activity;GO:0004559//alpha-mannosidase activity;GO:0046872//metal ion binding;GO:0005515//protein binding;GO:0016787//hydrolase activity;GO:0005488//binding;GO:0004553//hydrolase activity, hydrolyzing O-glycosyl compounds;GO:0043169//cation binding;GO:0043167//ion binding;GO:0015924//ma…	GO:0006508//proteolysis;GO:0050790//regulation of catalytic activity;GO:0071310//cellular response to organic substance;GO:0065007//biological regulation;GO:0031325//positive regulation of cellular metabolic process;GO:0019222//regulation of metabolic process;GO:0070887//cellular response to chemical stimulus;GO:0050794//regulation of cellular process;GO:0071704//organic substance metabolic proce…
TCONS_00065687	161.567	4.79	1.97333	0.04	-5.62449	0.00136163	0.0286571	yes	CNTN4	XP_017893910.1 PREDICTED: contactin-4 isoform X2 [Capra hircus]	-	-	-	-	-	-	GO:0051093//negative regulation of developmental process;GO:0048519//negative regulation of biological process;GO:0032501//multicellular organismal process;GO:0045596//negative regulation of cell differentiation;GO:0048856//anatomical structure development;GO:0065007//biological regulation;GO:0032502//developmental process;GO:0007275//multicellular organism development;GO:0050794//regulation of c…
TCONS_00066255	161.217	0	22.6733	0.001	-14.4687	0.000226388	0.00700856	yes	CATHL1A	XP_017893968.1 PREDICTED: cathelicidin-1 [Capra hircus]	Organismal Systems	Digestive system	ko04970//Salivary secretion	K13916	-	-	GO:0051704//multi-organism process;GO:0009617//response to bacterium;GO:0051707//response to other organism;GO:0009607//response to biotic stimulus;GO:0006950//response to stress;GO:0050896//response to stimulus;GO:0043207//response to external biotic stimulus;GO:0009605//response to external stimulus
TCONS_00066268	56.55	0	1.03	0.001	-10.0084	0.000205293	0.00647137	yes	DHX36	XP_017922273.1 PREDICTED: putative ATP-dependent RNA helicase DHX30 isoform X1 [Capra hircus]	-	-	-	-	-	-	-
TCONS_00066308	149.157	4.74333	3.67333	0.0766667	-5.58235	0.000273273	0.00810893	yes	PTH1R	XP_017922222.1 PREDICTED: parathyroid hormone/parathyroid hormone-related peptide receptor isoform X3 [Capra hircus]	Environmental Information Processing;Organismal Systems	Excretory system;Signaling molecules and interaction	ko04080//Neuroactive ligand-receptor interaction;ko04961//Endocrine and other factor-regulated calcium reabsorption	K04585	GO:0016020//membrane;GO:0005623//cell;GO:0016021//integral component of membrane;GO:0031224//intrinsic component of membrane;GO:0044425//membrane part;GO:0043226//organelle;GO:0031988//membrane-bounded vesicle;GO:0043227//membrane-bounded organelle;GO:0031982//vesicle;GO:0044464//cell part	GO:0060089//molecular transducer activity;GO:0005515//protein binding;GO:0099600//transmembrane receptor activity;GO:0038023//signaling receptor activity;GO:0004872//receptor activity;GO:0042277//peptide binding;GO:0004888//transmembrane signaling receptor activity;GO:0033218//amide binding;GO:0004871//signal transducer activity;GO:0005488//binding;GO:0004930//G-protein coupled receptor activity	GO:0007187//G-protein coupled receptor signaling pathway, coupled to cyclic nucleotide second messenger;GO:0007188//adenylate cyclase-modulating G-protein coupled receptor signaling pathway;GO:0007154//cell communication;GO:0055080//cation homeostasis;GO:0006875//cellular metal ion homeostasis;GO:0055065//metal ion homeostasis;GO:0050789//regulation of biological process;GO:0001503//ossification;…
TCONS_00066340	218.277	36.49	4.38333	0.383333	-3.51536	0.00183503	0.0360925	yes	Ccr2	XP_005696096.1 PREDICTED: C-C chemokine receptor type 2 [Capra hircus]	Environmental Information Processing;Organismal Systems	Immune system;Signaling molecules and interaction	ko04060//Cytokine-cytokine receptor interaction;ko04062//Chemokine signaling pathway	K04177	GO:0005622//intracellular;GO:0044424//intracellular part;GO:0044425//membrane part;GO:0016020//membrane;GO:0005623//cell;GO:0044464//cell part;GO:0031224//intrinsic component of membrane	GO:0099600//transmembrane receptor activity;GO:0005102//receptor binding;GO:0060089//molecular transducer activity;GO:0001653//peptide receptor activity;GO:0004888//transmembrane signaling receptor activity;GO:0008528//G-protein coupled peptide receptor activity;GO:0048020//CCR chemokine receptor binding;GO:0001637//G-protein coupled chemoattractant receptor activity;GO:0004872//receptor activity…	GO:0040017//positive regulation of locomotion;GO:0070887//cellular response to chemical stimulus;GO:2000145//regulation of cell motility;GO:0030335//positive regulation of cell migration;GO:0023052//signaling;GO:0051716//cellular response to stimulus;GO:0002688//regulation of leukocyte chemotaxis;GO:0044699//single-organism process;GO:0051270//regulation of cellular component movement;GO:0032101/…
TCONS_00067050	551.59	0.39	77.9233	0.0366667	-11.0534	3.86158e-11	1.1089e-08	yes	Prss16	XP_005696783.2 PREDICTED: thymus-specific serine protease [Capra hircus]	-	-	-	-	GO:0043226//organelle;GO:0043231//intracellular membrane-bounded organelle;GO:0005622//intracellular;GO:0043227//membrane-bounded organelle;GO:0044464//cell part;GO:0043229//intracellular organelle;GO:0005623//cell;GO:0044424//intracellular part	GO:0003824//catalytic activity;GO:0070011//peptidase activity, acting on L-amino acid peptides;GO:0008233//peptidase activity;GO:0016787//hydrolase activity	GO:0043170//macromolecule metabolic process;GO:0044238//primary metabolic process;GO:0071704//organic substance metabolic process;GO:0019538//protein metabolic process;GO:0008152//metabolic process
TCONS_00067080	1511.22	585.267	14.9633	3.49	-2.10013	0.00163398	0.0330734	yes	ZKSCAN8	XP_017894039.1 PREDICTED: LOW QUALITY PROTEIN: zinc finger protein with KRAB and SCAN domains 8 [Capra hircus]	-	-	-	-	-	-	-
TCONS_00067326	258.903	1.38667	17.7033	0.05	-8.46788	3.5409e-08	3.99002e-06	yes	HLA-DQA1	XP_013832491.2 PREDICTED: HA25 [Capra hircus]	Organismal Systems;Environmental Information Processing;Cellular Processes	Immune system;Transport and catabolism;Signaling molecules and interaction	ko04514//Cell adhesion molecules (CAMs);ko04145//Phagosome;ko04612//Antigen processing and presentation;ko04672//Intestinal immune network for IgA production	K06752	GO:0098796//membrane protein complex;GO:0044425//membrane part;GO:0071944//cell periphery;GO:0098797//plasma membrane protein complex;GO:0043234//protein complex;GO:0016020//membrane;GO:0032991//macromolecular complex;GO:0042611//MHC protein complex;GO:0044459//plasma membrane part;GO:0031224//intrinsic component of membrane;GO:0044464//cell part;GO:0005886//plasma membrane;GO:0005623//cell	GO:0003823//antigen binding;GO:0005488//binding	GO:1903037//regulation of leukocyte cell-cell adhesion;GO:0019884//antigen processing and presentation of exogenous antigen;GO:1902105//regulation of leukocyte differentiation;GO:0050789//regulation of biological process;GO:0022407//regulation of cell-cell adhesion;GO:0050793//regulation of developmental process;GO:1903706//regulation of hemopoiesis;GO:0030155//regulation of cell adhesion;GO:0050…
TCONS_00067509	76.6433	0	0.723333	0.001	-9.49852	6.77261e-05	0.00268193	yes	TRERF1	XP_017894583.1 PREDICTED: transcriptional-regulating factor 1 isoform X5 [Capra hircus]	-	-	-	-	GO:0043226//organelle;GO:0044464//cell part;GO:0044424//intracellular part;GO:0043231//intracellular membrane-bounded organelle;GO:0005623//cell;GO:0043229//intracellular organelle;GO:0005622//intracellular;GO:0043227//membrane-bounded organelle	GO:0043169//cation binding;GO:0005488//binding;GO:0043167//ion binding	-
TCONS_00067602	37.8367	0	0.956667	0.001	-9.90187	0.00217098	0.0409799	yes	MDGA1	XP_019686101.1 PREDICTED: MAM domain-containing glycosylphosphatidylinositol anchor protein 1 isoform X1 [Felis catus]	-	-	-	-	GO:0043231//intracellular membrane-bounded organelle;GO:0044421//extracellular region part;GO:0005622//intracellular;GO:0044425//membrane part;GO:0016020//membrane;GO:0031224//intrinsic component of membrane;GO:0043229//intracellular organelle;GO:0043226//organelle;GO:0044424//intracellular part;GO:0005623//cell;GO:0031225//anchored component of membrane;GO:0044464//cell part;GO:0043227//membrane…	-	GO:0051179//localization;GO:0009987//cellular process;GO:0021795//cerebral cortex cell migration;GO:0021885//forebrain cell migration;GO:0060322//head development;GO:0021537//telencephalon development;GO:0048870//cell motility;GO:0040011//locomotion;GO:0030900//forebrain development;GO:0016477//cell migration;GO:0044699//single-organism process;GO:0032501//multicellular organismal process;GO:0007…
TCONS_00067718	501.64	9.10667	13.93	0.16	-6.44398	1.48089e-05	0.000743115	yes	DAXX	XP_017894066.1 PREDICTED: death domain-associated protein 6 [Capra hircus]	Environmental Information Processing	Signal transduction	ko04010//MAPK signaling pathway	K02308	GO:0016604//nuclear body;GO:0044427//chromosomal part;GO:0044424//intracellular part;GO:0070013//intracellular organelle lumen;GO:0005622//intracellular;GO:0005654//nucleoplasm;GO:0043233//organelle lumen;GO:0043228//non-membrane-bounded organelle;GO:0044446//intracellular organelle part;GO:0005634//nucleus;GO:0043232//intracellular non-membrane-bounded organelle;GO:0044422//organelle part;GO:000…	GO:0098772//molecular function regulator;GO:0003712//transcription cofactor activity;GO:0019900//kinase binding;GO:0035258//steroid hormone receptor binding;GO:0035257//nuclear hormone receptor binding;GO:0051427//hormone receptor binding;GO:0005102//receptor binding;GO:0019207//kinase regulator activity;GO:0005488//binding;GO:0019887//protein kinase regulator activity;GO:0000988//transcription f…	GO:0031326//regulation of cellular biosynthetic process;GO:1903506//regulation of nucleic acid-templated transcription;GO:0032870//cellular response to hormone stimulus;GO:0044763//single-organism cellular process;GO:0009725//response to hormone;GO:0051276//chromosome organization;GO:0031399//regulation of protein modification process;GO:0044699//single-organism process;GO:0050896//response to st…
TCONS_00067746	340.5	79.41	6.43	0.85	-2.91928	0.000738693	0.0177923	yes	HLA-DOA	XP_019840797.1 PREDICTED: HLA class II histocompatibility antigen, DO alpha chain-like isoform X1 [Bos indicus]	Cellular Processes;Environmental Information Processing;Organismal Systems	Transport and catabolism;Immune system;Signaling molecules and interaction	ko04514//Cell adhesion molecules (CAMs);ko04145//Phagosome;ko04612//Antigen processing and presentation;ko04672//Intestinal immune network for IgA production	K06752	GO:0043234//protein complex;GO:0005623//cell;GO:0071944//cell periphery;GO:0044464//cell part;GO:0032991//macromolecular complex;GO:0044425//membrane part;GO:0016020//membrane;GO:0098796//membrane protein complex;GO:0098797//plasma membrane protein complex;GO:0042611//MHC protein complex;GO:0031224//intrinsic component of membrane;GO:0044459//plasma membrane part;GO:0005886//plasma membrane	GO:0032403//protein complex binding;GO:0005515//protein binding;GO:0003823//antigen binding;GO:0044877//macromolecular complex binding;GO:0005488//binding;GO:0023023//MHC protein complex binding	GO:0019884//antigen processing and presentation of exogenous antigen;GO:1902105//regulation of leukocyte differentiation;GO:0002376//immune system process;GO:0050789//regulation of biological process;GO:0002694//regulation of leukocyte activation;GO:0019882//antigen processing and presentation;GO:0051249//regulation of lymphocyte activation;GO:0048002//antigen processing and presentation of pepti…
TCONS_00068193	381.01	18.0533	4.96	0.153333	-5.0156	8.2779e-05	0.00314645	yes	FAM65B	XP_012018494.1 PREDICTED: protein FAM65B isoform X1 [Ovis aries musimon]	-	-	-	-	GO:0044464//cell part;GO:0098590//plasma membrane region;GO:0031528//microvillus membrane;GO:0005902//microvillus;GO:0005886//plasma membrane;GO:0098858//actin-based cell projection;GO:0098805//whole membrane;GO:0044425//membrane part;GO:0042995//cell projection;GO:0098589//membrane region;GO:0071944//cell periphery;GO:0005622//intracellular;GO:0044459//plasma membrane part;GO:0044424//intracellu…	-	GO:0032501//multicellular organismal process;GO:0003008//system process;GO:0050877//neurological system process;GO:0050954//sensory perception of mechanical stimulus;GO:0007600//sensory perception
TCONS_00068271	5570.46	440.9	216.943	12.4433	-4.12387	3.11794e-05	0.00138918	yes	HIST1H1C	XP_017893999.1 PREDICTED: histone H1.2 [Capra hircus]	-	-	-	-	GO:0044464//cell part;GO:0000790//nuclear chromatin;GO:0044422//organelle part;GO:0044454//nuclear chromosome part;GO:0070013//intracellular organelle lumen;GO:0043229//intracellular organelle;GO:0032991//macromolecular complex;GO:0031981//nuclear lumen;GO:0031974//membrane-enclosed lumen;GO:0005623//cell;GO:0000785//chromatin;GO:0043232//intracellular non-membrane-bounded organelle;GO:0005622//i…	GO:0003682//chromatin binding;GO:0005488//binding;GO:0044877//macromolecular complex binding;GO:0097159//organic cyclic compound binding;GO:1901363//heterocyclic compound binding;GO:0003676//nucleic acid binding;GO:0003723//RNA binding	GO:0034728//nucleosome organization;GO:0043933//macromolecular complex subunit organization;GO:0006325//chromatin organization;GO:0051276//chromosome organization;GO:0006996//organelle organization;GO:0016043//cellular component organization;GO:0071824//protein-DNA complex subunit organization;GO:0071822//protein complex subunit organization;GO:0071840//cellular component organization or biogenes…
TCONS_00068412	93.1667	0	2.44667	0.001	-11.2566	2.14873e-05	0.00100992	yes	TRIM26	XP_017894306.1 PREDICTED: tripartite motif-containing protein 26 [Capra hircus]	-	-	-	-	-	-	-
TCONS_00068432	1979.32	168.407	31.6433	1.87667	-4.07566	3.76485e-05	0.00162535	yes	PPP1R18	XP_017894344.1 PREDICTED: LOW QUALITY PROTEIN: phostensin [Capra hircus]	-	-	-	-	GO:0043228//non-membrane-bounded organelle;GO:0005622//intracellular;GO:0005623//cell;GO:0043229//intracellular organelle;GO:0044464//cell part;GO:0043226//organelle;GO:0043232//intracellular non-membrane-bounded organelle;GO:0044424//intracellular part	GO:0005488//binding;GO:0005515//protein binding;GO:0008092//cytoskeletal protein binding	-
TCONS_00068474	36.9767	0	1.12	0.001	-10.1293	0.00169748	0.0340337	yes	-	XP_014945501.1 PREDICTED: BOLA class I histocompatibility antigen, alpha chain BL3-7-like isoform X4 [Ovis aries musimon]	Cellular Processes;Environmental Information Processing;Organismal Systems	Immune system;Transport and catabolism;Signaling molecules and interaction	ko04144//Endocytosis;ko04514//Cell adhesion molecules (CAMs);ko04650//Natural killer cell mediated cytotoxicity;ko04145//Phagosome;ko04612//Antigen processing and presentation	K06751	-	-	-
TCONS_00068478	2282.3	656.447	53.0233	8.79667	-2.5916	0.00014015	0.00480591	yes	DDX39B	XP_008710152.1 PREDICTED: LOW QUALITY PROTEIN: spliceosome RNA helicase DDX39B [Ursus maritimus]	Genetic Information Processing	Transcription;Translation	ko03013//RNA transport;ko03040//Spliceosome;ko03015//mRNA surveillance pathway	K12812	GO:0044424//intracellular part;GO:0016604//nuclear body;GO:0005634//nucleus;GO:0031974//membrane-enclosed lumen;GO:0043226//organelle;GO:0044428//nuclear part;GO:0030532//small nuclear ribonucleoprotein complex;GO:0005622//intracellular;GO:0005623//cell;GO:0043227//membrane-bounded organelle;GO:0032991//macromolecular complex;GO:0043231//intracellular membrane-bounded organelle;GO:0030529//intrac…	GO:0042623//ATPase activity, coupled;GO:0032549//ribonucleoside binding;GO:0097367//carbohydrate derivative binding;GO:0003723//RNA binding;GO:0005515//protein binding;GO:0097159//organic cyclic compound binding;GO:0036094//small molecule binding;GO:0005488//binding;GO:0004386//helicase activity;GO:0001882//nucleoside binding;GO:0003824//catalytic activity;GO:0016462//pyrophosphatase activity;GO:…	GO:0044763//single-organism cellular process;GO:0022402//cell cycle process;GO:0000077//DNA damage checkpoint;GO:0006355//regulation of transcription, DNA-templated;GO:0007049//cell cycle;GO:0051716//cellular response to stimulus;GO:0031323//regulation of cellular metabolic process;GO:0022618//ribonucleoprotein complex assembly;GO:0051171//regulation of nitrogen compound metabolic process;GO:0044…
TCONS_00068592	335.75	10.1633	15.1667	0.3	-5.6598	0.00101462	0.0229672	yes	GPSM3	XP_005696590.1 PREDICTED: G-protein-signaling modulator 3 isoform X2 [Capra hircus]	-	-	-	-	-	GO:0098772//molecular function regulator;GO:0030234//enzyme regulator activity;GO:0060589//nucleoside-triphosphatase regulator activity	GO:0007154//cell communication;GO:0009987//cellular process;GO:0050794//regulation of cellular process;GO:0051716//cellular response to stimulus;GO:0019222//regulation of metabolic process;GO:0007165//signal transduction;GO:0044700//single organism signaling;GO:0044699//single-organism process;GO:0050789//regulation of biological process;GO:0065007//biological regulation;GO:0044763//single-organi…
TCONS_00068753	569.667	0	28.88	0.001	-14.8178	1.61843e-11	5.33603e-09	yes	PTCRA	XP_017894154.1 PREDICTED: LOW QUALITY PROTEIN: pre T-cell antigen receptor alpha [Capra hircus]	Environmental Information Processing	Signal transduction	ko04330//Notch signaling pathway	K06056	-	-	GO:0043066//negative regulation of apoptotic process;GO:0042981//regulation of apoptotic process;GO:0043069//negative regulation of programmed cell death;GO:0050789//regulation of biological process;GO:0010941//regulation of cell death;GO:2000106//regulation of leukocyte apoptotic process;GO:0070228//regulation of lymphocyte apoptotic process;GO:0070233//negative regulation of T cell apoptotic pr…
TCONS_00068935	328.553	11.8333	2.41	0.05	-5.59096	9.37081e-08	9.20739e-06	yes	ARMC12	XP_013829334.2 PREDICTED: armadillo repeat-containing protein 12 isoform X1 [Capra hircus]	-	-	-	-	-	-	-
TCONS_00069022	368.367	0.626667	4.62333	0.00333333	-10.4378	2.68459e-11	8.47454e-09	yes	KIFC1	XP_017894069.1 PREDICTED: kinesin-like protein KIFC1 isoform X2 [Capra hircus]	-	-	-	-	-	-	-
TCONS_00069175	58.9633	0	0.656667	0.001	-9.35902	0.000271293	0.00807612	yes	CD226	XP_005697014.2 PREDICTED: CD226 antigen [Capra hircus]	Environmental Information Processing	Signaling molecules and interaction	ko04514//Cell adhesion molecules (CAMs)	K06567	GO:0005623//cell;GO:0016020//membrane;GO:0071944//cell periphery;GO:0044464//cell part;GO:0005886//plasma membrane;GO:0044425//membrane part;GO:0044459//plasma membrane part	GO:0019899//enzyme binding;GO:0005488//binding;GO:0005515//protein binding;GO:0019900//kinase binding;GO:0005102//receptor binding	GO:0002839//positive regulation of immune response to tumor cell;GO:0048522//positive regulation of cellular process;GO:0002705//positive regulation of leukocyte mediated immunity;GO:0002706//regulation of lymphocyte mediated immunity;GO:0002834//regulation of response to tumor cell;GO:0050789//regulation of biological process;GO:0002712//regulation of B cell mediated immunity;GO:0002708//positiv…
TCONS_00069416	34.0067	0	0.283333	0.001	-8.14636	0.00235829	0.0435911	yes	SMCHD1	XP_013829733.1 PREDICTED: structural maintenance of chromosomes flexible hinge domain-containing protein 1 isoform X1 [Capra hircus]	-	-	-	-	GO:0043232//intracellular non-membrane-bounded organelle;GO:0044464//cell part;GO:0044424//intracellular part;GO:0005622//intracellular;GO:0043229//intracellular organelle;GO:0005623//cell;GO:0043228//non-membrane-bounded organelle;GO:0043226//organelle	GO:0001882//nucleoside binding;GO:0097159//organic cyclic compound binding;GO:0036094//small molecule binding;GO:1901363//heterocyclic compound binding;GO:0032550//purine ribonucleoside binding;GO:0097367//carbohydrate derivative binding;GO:0005488//binding;GO:0032549//ribonucleoside binding;GO:0001883//purine nucleoside binding	GO:0065007//biological regulation;GO:0019222//regulation of metabolic process;GO:0007549//dosage compensation;GO:0010468//regulation of gene expression;GO:0060255//regulation of macromolecule metabolic process;GO:0009048//dosage compensation by inactivation of X chromosome;GO:0009987//cellular process;GO:0006996//organelle organization;GO:0016043//cellular component organization;GO:0071840//cellu…
TCONS_00069519	2706.26	170.133	24.6833	0.96	-4.68436	4.08565e-09	6.28827e-07	yes	LDLRAD4	XP_005892431.1 PREDICTED: LOW QUALITY PROTEIN: low-density lipoprotein receptor class A domain-containing protein 4 [Bos mutus]	-	-	-	-	GO:0043227//membrane-bounded organelle;GO:0005623//cell;GO:0043226//organelle;GO:0044424//intracellular part;GO:0043231//intracellular membrane-bounded organelle;GO:0012505//endomembrane system;GO:0044444//cytoplasmic part;GO:0044464//cell part;GO:0005737//cytoplasm;GO:0043229//intracellular organelle;GO:0005622//intracellular;GO:0005769//early endosome;GO:0005768//endosome	GO:0005488//binding;GO:0005515//protein binding;GO:0046332//SMAD binding	GO:0032269//negative regulation of cellular protein metabolic process;GO:0031399//regulation of protein modification process;GO:0009892//negative regulation of metabolic process;GO:0019222//regulation of metabolic process;GO:0031324//negative regulation of cellular metabolic process;GO:0032268//regulation of cellular protein metabolic process;GO:0031400//negative regulation of protein modificatio…
TCONS_00069520	2844.15	76.5433	26.6067	0.473333	-5.81279	7.25701e-06	0.00040026	yes	LDLRAD4	XP_006051156.1 PREDICTED: low-density lipoprotein receptor class A domain-containing protein 4 isoform X1 [Bubalus bubalis]	-	-	-	-	GO:0005737//cytoplasm;GO:0044444//cytoplasmic part;GO:0043227//membrane-bounded organelle;GO:0012505//endomembrane system;GO:0005769//early endosome;GO:0043229//intracellular organelle;GO:0043226//organelle;GO:0044424//intracellular part;GO:0044464//cell part;GO:0005768//endosome;GO:0043231//intracellular membrane-bounded organelle;GO:0005622//intracellular;GO:0005623//cell	GO:0005515//protein binding;GO:0046332//SMAD binding;GO:0005488//binding	GO:0060255//regulation of macromolecule metabolic process;GO:0019220//regulation of phosphate metabolic process;GO:2000145//regulation of cell motility;GO:0051270//regulation of cellular component movement;GO:0040012//regulation of locomotion;GO:0043254//regulation of protein complex assembly;GO:0048583//regulation of response to stimulus;GO:0080090//regulation of primary metabolic process;GO:005…
TCONS_00069666	0.00333333	126.873	0.001	0.873333	9.77039	0.00176153	0.0349246	yes	ZNF532	XP_017895006.1 PREDICTED: zinc finger protein 532 isoform X2 [Capra hircus]	-	-	-	-	-	-	-
TCONS_00070044	0	290.92	0.001	2.50667	11.2916	0.000110596	0.00398468	yes	YES1	XP_005697122.1 PREDICTED: tyrosine-protein kinase Yes [Capra hircus]	Cellular Processes	Cellular commiunity	ko04530//Tight junction;ko04520//Adherens junction	K05705	GO:0030054//cell junction;GO:0043228//non-membrane-bounded organelle;GO:0044464//cell part;GO:0070161//anchoring junction;GO:0005912//adherens junction;GO:0005856//cytoskeleton;GO:0016020//membrane;GO:0030055//cell-substrate junction;GO:0043226//organelle;GO:0015629//actin cytoskeleton;GO:0005623//cell;GO:0043232//intracellular non-membrane-bounded organelle;GO:0005622//intracellular;GO:0031988//…	GO:0016740//transferase activity;GO:1901363//heterocyclic compound binding;GO:0036094//small molecule binding;GO:0016772//transferase activity, transferring phosphorus-containing groups;GO:0016773//phosphotransferase activity, alcohol group as acceptor;GO:0097159//organic cyclic compound binding;GO:0005515//protein binding;GO:0097367//carbohydrate derivative binding;GO:0004672//protein kinase act…	GO:0070848//response to growth factor;GO:0036211//protein modification process;GO:0006793//phosphorus metabolic process;GO:0009987//cellular process;GO:0044260//cellular macromolecule metabolic process;GO:0043170//macromolecule metabolic process;GO:0016310//phosphorylation;GO:0006796//phosphate-containing compound metabolic process;GO:0043412//macromolecule modification;GO:0008645//hexose transpo…
TCONS_00070104	110.583	0	1.03667	0.001	-10.0177	0.00109694	0.0243623	yes	LAMA1	XP_017895092.1 PREDICTED: laminin subunit alpha-1 isoform X1 [Capra hircus]	Cellular Processes;Environmental Information Processing	Cellular commiunity;Signaling molecules and interaction;Signal transduction	ko04151//PI3K-Akt signaling pathway;ko04510//Focal adhesion;ko04512//ECM-receptor interaction	K05637	GO:0005576//extracellular region;GO:0005578//proteinaceous extracellular matrix;GO:0031012//extracellular matrix;GO:0005605//basal lamina;GO:0043234//protein complex;GO:0044421//extracellular region part;GO:0030054//cell junction;GO:0032991//macromolecular complex;GO:0005604//basement membrane;GO:0044420//extracellular matrix component;GO:0043256//laminin complex	GO:0008289//lipid binding;GO:0005515//protein binding;GO:0005488//binding;GO:0046625//sphingolipid binding;GO:0005198//structural molecule activity	GO:0007155//cell adhesion;GO:0016477//cell migration;GO:0072359//circulatory system development;GO:0035239//tube morphogenesis;GO:0030855//epithelial cell differentiation;GO:0007275//multicellular organism development;GO:0040011//locomotion;GO:0048729//tissue morphogenesis;GO:2000026//regulation of multicellular organismal development;GO:0050896//response to stimulus;GO:0007165//signal transducti…
TCONS_00070228	0	85.4033	0.001	1.26333	10.303	0.000403684	0.0111326	yes	MBD1	XP_013829820.2 PREDICTED: methyl-CpG-binding domain protein 1 isoform X14 [Capra hircus]	-	-	-	-	GO:0044422//organelle part;GO:0044464//cell part;GO:0044451//nucleoplasm part;GO:0043227//membrane-bounded organelle;GO:0043226//organelle;GO:0043229//intracellular organelle;GO:0044446//intracellular organelle part;GO:0043233//organelle lumen;GO:0005623//cell;GO:0044428//nuclear part;GO:0044427//chromosomal part;GO:0043228//non-membrane-bounded organelle;GO:0000785//chromatin;GO:0005634//nucleus…	GO:1901363//heterocyclic compound binding;GO:0097159//organic cyclic compound binding;GO:0043169//cation binding;GO:0005488//binding;GO:0046914//transition metal ion binding;GO:0003676//nucleic acid binding;GO:0043167//ion binding;GO:0046872//metal ion binding	-
TCONS_00070560	346.62	14.09	8.47667	0.24	-5.14239	0.000144664	0.00492656	yes	CCNF	XP_017896464.1 PREDICTED: cyclin-F [Capra hircus]	-	-	-	-	GO:0005623//cell;GO:0043227//membrane-bounded organelle;GO:1990234//transferase complex;GO:0043228//non-membrane-bounded organelle;GO:0031461//cullin-RING ubiquitin ligase complex;GO:0043234//protein complex;GO:1902494//catalytic complex;GO:0044424//intracellular part;GO:0005622//intracellular;GO:0043231//intracellular membrane-bounded organelle;GO:0043229//intracellular organelle;GO:0043232//int…	-	GO:0044763//single-organism cellular process;GO:0010498//proteasomal protein catabolic process;GO:1901575//organic substance catabolic process;GO:0010639//negative regulation of organelle organization;GO:0043170//macromolecule metabolic process;GO:0008152//metabolic process;GO:0006511//ubiquitin-dependent protein catabolic process;GO:0000003//reproduction;GO:0032446//protein modification by small…
TCONS_00070721	133.077	0.00333333	1.46667	0.001	-10.5183	5.62391e-07	4.4383e-05	yes	DNASE1	XP_005697533.1 PREDICTED: deoxyribonuclease-1 [Capra hircus]	-	-	-	-	-	-	-
TCONS_00070748	233.53	0	5.57667	0.001	-12.4452	6.33293e-05	0.00253488	yes	-	XP_005697542.2 PREDICTED: uncharacterized protein C16orf71 homolog [Capra hircus]	-	-	-	-	-	-	-
TCONS_00070749	65.55	0	1.93333	0.001	-10.9169	0.000103996	0.00378484	yes	-	XP_005697542.2 PREDICTED: uncharacterized protein C16orf71 homolog [Capra hircus]	-	-	-	-	-	-	-
TCONS_00070964	740.877	229.587	5.95	1.12667	-2.40083	0.0010263	0.0231009	yes	XYLT1	XP_017896320.1 PREDICTED: xylosyltransferase 1 [Capra hircus]	Metabolism	Glycan biosynthesis and metabolism;Global and Overview	ko01100//Metabolic pathways;ko00534//Glycosaminoglycan biosynthesis - heparan sulfate / heparin;ko00532//Glycosaminoglycan biosynthesis - chondroitin sulfate / dermatan sulfate	K00771	-	GO:0003824//catalytic activity;GO:0008194//UDP-glycosyltransferase activity;GO:0016757//transferase activity, transferring glycosyl groups;GO:0016763//transferase activity, transferring pentosyl groups;GO:0035252//UDP-xylosyltransferase activity;GO:0042285//xylosyltransferase activity;GO:0016740//transferase activity	GO:0009059//macromolecule biosynthetic process;GO:0006950//response to stress;GO:0071704//organic substance metabolic process;GO:0009266//response to temperature stimulus;GO:1901135//carbohydrate derivative metabolic process;GO:0006807//nitrogen compound metabolic process;GO:0008152//metabolic process;GO:1901564//organonitrogen compound metabolic process;GO:1901137//carbohydrate derivative biosyn…
TCONS_00071058	1104.07	9.61667	39.27	0.246667	-7.31472	1.35062e-08	1.72747e-06	yes	PLK1	XP_004020890.1 PREDICTED: serine/threonine-protein kinase PLK1 [Ovis aries]	Cellular Processes;Environmental Information Processing;Organismal Systems	Endocrine system;Signal transduction;Cell growth and death	ko04068//FoxO signaling pathway;ko04110//Cell cycle;ko04114//Oocyte meiosis;ko04914//Progesterone-mediated oocyte maturation	K06631	GO:0043227//membrane-bounded organelle;GO:0000940//condensed chromosome outer kinetochore;GO:0005815//microtubule organizing center;GO:0044424//intracellular part;GO:0043231//intracellular membrane-bounded organelle;GO:0098687//chromosomal region;GO:0000775//chromosome, centromeric region;GO:0043226//organelle;GO:0000777//condensed chromosome kinetochore;GO:0005694//chromosome;GO:0000779//condens…	GO:0044877//macromolecular complex binding;GO:0016773//phosphotransferase activity, alcohol group as acceptor;GO:0032550//purine ribonucleoside binding;GO:0036094//small molecule binding;GO:0016772//transferase activity, transferring phosphorus-containing groups;GO:0016301//kinase activity;GO:0001882//nucleoside binding;GO:0097367//carbohydrate derivative binding;GO:0005515//protein binding;GO:00…	GO:0051301//cell division;GO:1901800//positive regulation of proteasomal protein catabolic process;GO:0031329//regulation of cellular catabolic process;GO:0042176//regulation of protein catabolic process;GO:1903364//positive regulation of cellular protein catabolic process;GO:0008104//protein localization;GO:0051726//regulation of cell cycle;GO:0045732//positive regulation of protein catabolic pr…
TCONS_00071136	289.92	37.92	4.94333	0.376667	-3.71412	9.58857e-05	0.00353301	yes	KCTD13	XP_004020939.1 PREDICTED: BTB/POZ domain-containing adapter for CUL3-mediated RhoA degradation protein 1 [Ovis aries]	-	-	-	-	GO:0043229//intracellular organelle;GO:0044464//cell part;GO:1990234//transferase complex;GO:0044424//intracellular part;GO:0000151//ubiquitin ligase complex;GO:0005623//cell;GO:0043234//protein complex;GO:1902494//catalytic complex;GO:0032991//macromolecular complex;GO:0043227//membrane-bounded organelle;GO:0043226//organelle;GO:0005622//intracellular;GO:0043231//intracellular membrane-bounded o…	GO:0019899//enzyme binding;GO:0005515//protein binding;GO:0017016//Ras GTPase binding;GO:0051020//GTPase binding;GO:0031267//small GTPase binding;GO:0019787//ubiquitin-like protein transferase activity;GO:0003824//catalytic activity;GO:0005488//binding;GO:0016740//transferase activity;GO:0017048//Rho GTPase binding	GO:0016043//cellular component organization;GO:1902589//single-organism organelle organization;GO:1901575//organic substance catabolic process;GO:0046578//regulation of Ras protein signal transduction;GO:0036211//protein modification process;GO:0043412//macromolecule modification;GO:0051056//regulation of small GTPase mediated signal transduction;GO:0006928//movement of cell or subcellular compon…
TCONS_00071490	499.483	29.8267	7.37333	0.243333	-4.92131	0.00206531	0.0394028	yes	LRCH4	XP_017895865.1 PREDICTED: leucine-rich repeat and calponin homology domain-containing protein 4 isoform X1 [Capra hircus]	-	-	-	-	-	-	-
TCONS_00071954	698.567	30.5233	6.8	0.186667	-5.187	9.22347e-07	6.95825e-05	yes	NLRC3	XP_017896518.1 PREDICTED: protein NLRC3 [Capra hircus]	-	-	-	-	GO:0044424//intracellular part;GO:0005623//cell;GO:0005622//intracellular;GO:0044464//cell part	GO:1901363//heterocyclic compound binding;GO:0001882//nucleoside binding;GO:0097367//carbohydrate derivative binding;GO:0097159//organic cyclic compound binding;GO:0005488//binding;GO:0001883//purine nucleoside binding;GO:0036094//small molecule binding;GO:0032550//purine ribonucleoside binding;GO:0032549//ribonucleoside binding	GO:1903506//regulation of nucleic acid-templated transcription;GO:0009966//regulation of signal transduction;GO:0051252//regulation of RNA metabolic process;GO:0019222//regulation of metabolic process;GO:0042221//response to chemical;GO:2000113//negative regulation of cellular macromolecule biosynthetic process;GO:0050896//response to stimulus;GO:0031324//negative regulation of cellular metabolic…
TCONS_00072249	862.7	3.35	31.7433	0.0866667	-8.51676	1.61095e-09	2.89126e-07	yes	LAT	XP_017896275.1 PREDICTED: linker for activation of T-cells family member 1 isoform X3 [Capra hircus]	Organismal Systems;Environmental Information Processing	Immune system;Signal transduction	ko04014//Ras signaling pathway;ko04015//Rap1 signaling pathway;ko04650//Natural killer cell mediated cytotoxicity;ko04660//T cell receptor signaling pathway;ko04064//NF-kappa B signaling pathway;ko04666//Fc gamma R-mediated phagocytosis;ko04664//Fc epsilon RI signaling pathway	K07362	GO:0043226//organelle;GO:0032991//macromolecular complex;GO:0043228//non-membrane-bounded organelle;GO:0005622//intracellular;GO:0044425//membrane part;GO:0031988//membrane-bounded vesicle;GO:0043227//membrane-bounded organelle;GO:0005623//cell;GO:0044424//intracellular part;GO:0016020//membrane;GO:0043229//intracellular organelle;GO:0044464//cell part;GO:0031224//intrinsic component of membrane;…	GO:0019899//enzyme binding;GO:0022857//transmembrane transporter activity;GO:0019900//kinase binding;GO:0030674//protein binding, bridging;GO:0060090//binding, bridging;GO:0005215//transporter activity;GO:0015171//amino acid transmembrane transporter activity;GO:0046943//carboxylic acid transmembrane transporter activity;GO:0005515//protein binding;GO:0005488//binding;GO:0005342//organic acid tra…	GO:0044699//single-organism process;GO:0048872//homeostasis of number of cells;GO:0007154//cell communication;GO:0006820//anion transport;GO:0006810//transport;GO:0002376//immune system process;GO:0019932//second-messenger-mediated signaling;GO:0042592//homeostatic process;GO:0015711//organic anion transport;GO:0030155//regulation of cell adhesion;GO:0003333//amino acid transmembrane transport;GO…
TCONS_00072250	345.223	0	13	0.001	-13.6662	2.35055e-09	3.91846e-07	yes	Lat	XP_017896276.1 PREDICTED: linker for activation of T-cells family member 1 isoform X4 [Capra hircus]	Environmental Information Processing;Organismal Systems	Immune system;Signal transduction	ko04014//Ras signaling pathway;ko04015//Rap1 signaling pathway;ko04650//Natural killer cell mediated cytotoxicity;ko04660//T cell receptor signaling pathway;ko04064//NF-kappa B signaling pathway;ko04666//Fc gamma R-mediated phagocytosis;ko04664//Fc epsilon RI signaling pathway	K07362	GO:0005622//intracellular;GO:0043231//intracellular membrane-bounded organelle;GO:0043226//organelle;GO:0030054//cell junction;GO:0043227//membrane-bounded organelle;GO:0044464//cell part;GO:0043232//intracellular non-membrane-bounded organelle;GO:0043228//non-membrane-bounded organelle;GO:0043229//intracellular organelle;GO:0031224//intrinsic component of membrane;GO:0044425//membrane part;GO:00…	GO:0019899//enzyme binding;GO:0015171//amino acid transmembrane transporter activity;GO:0022857//transmembrane transporter activity;GO:0008514//organic anion transmembrane transporter activity;GO:0030674//protein binding, bridging;GO:0046943//carboxylic acid transmembrane transporter activity;GO:0005488//binding;GO:0008509//anion transmembrane transporter activity;GO:0005515//protein binding;GO:0…	GO:0002376//immune system process;GO:0050794//regulation of cellular process;GO:0065008//regulation of biological quality;GO:0098656//anion transmembrane transport;GO:0071702//organic substance transport;GO:0006950//response to stress;GO:1902578//single-organism localization;GO:0042592//homeostatic process;GO:0023051//regulation of signaling;GO:0007166//cell surface receptor signaling pathway;GO:…
TCONS_00072338	67.0333	0	0.626667	0.001	-9.29155	9.05334e-05	0.00337491	yes	MVP	XP_005697745.2 PREDICTED: major vault protein [Capra hircus]	-	-	-	-	GO:0043228//non-membrane-bounded organelle;GO:0044464//cell part;GO:0043232//intracellular non-membrane-bounded organelle;GO:0031982//vesicle;GO:0032991//macromolecular complex;GO:0043227//membrane-bounded organelle;GO:0031988//membrane-bounded vesicle;GO:0005622//intracellular;GO:0043229//intracellular organelle;GO:0005737//cytoplasm;GO:0043226//organelle;GO:0044424//intracellular part;GO:004444…	GO:0019902//phosphatase binding;GO:0019900//kinase binding;GO:0005515//protein binding;GO:0005488//binding;GO:0019899//enzyme binding	GO:0065007//biological regulation;GO:0050896//response to stimulus;GO:0044700//single organism signaling;GO:0042326//negative regulation of phosphorylation;GO:0043549//regulation of kinase activity;GO:0019222//regulation of metabolic process;GO:0042325//regulation of phosphorylation;GO:0051338//regulation of transferase activity;GO:0007169//transmembrane receptor protein tyrosine kinase signaling…
TCONS_00072343	688.083	14.46	10.4633	0.146667	-6.15666	1.6715e-09	2.97594e-07	yes	PAGR1	XP_005697746.2 PREDICTED: proline-rich transmembrane protein 2 [Capra hircus]	-	-	-	-	GO:0016020//membrane	-	-
TCONS_00072370	674	27.86	34.35	0.976667	-5.1363	8.06004e-07	6.16413e-05	yes	SEPT1	ELR61410.1 Septin-1, partial [Bos mutus]	-	-	-	-	GO:0005623//cell;GO:0043226//organelle;GO:0043229//intracellular organelle;GO:0043228//non-membrane-bounded organelle;GO:0044422//organelle part;GO:0044430//cytoskeletal part;GO:0044464//cell part;GO:0044446//intracellular organelle part;GO:0005622//intracellular;GO:0043232//intracellular non-membrane-bounded organelle;GO:0044424//intracellular part;GO:0005856//cytoskeleton	GO:0005488//binding;GO:0036094//small molecule binding	GO:0044763//single-organism cellular process;GO:0009987//cellular process;GO:0044699//single-organism process
TCONS_00072465	81.6633	0	1.63333	0.001	-10.6736	0.00028591	0.00840546	yes	LIMK1	XP_011978526.1 PREDICTED: LIM domain kinase 1 isoform X3 [Ovis aries musimon]	Cellular Processes;Organismal Systems	Cell motility;Development;Immune system	ko04810//Regulation of actin cytoskeleton;ko04360//Axon guidance;ko04666//Fc gamma R-mediated phagocytosis	K05743	GO:0043233//organelle lumen;GO:0005623//cell;GO:0044428//nuclear part;GO:0043229//intracellular organelle;GO:0070161//anchoring junction;GO:0070013//intracellular organelle lumen;GO:0031974//membrane-enclosed lumen;GO:0031981//nuclear lumen;GO:0005622//intracellular;GO:0005912//adherens junction;GO:0044446//intracellular organelle part;GO:0044422//organelle part;GO:0044444//cytoplasmic part;GO:00…	GO:0097159//organic cyclic compound binding;GO:0001882//nucleoside binding;GO:0043169//cation binding;GO:0032550//purine ribonucleoside binding;GO:0036094//small molecule binding;GO:0046983//protein dimerization activity;GO:0016301//kinase activity;GO:0016740//transferase activity;GO:0043167//ion binding;GO:0046872//metal ion binding;GO:1901363//heterocyclic compound binding;GO:0001883//purine nu…	GO:0002682//regulation of immune system process;GO:0044767//single-organism developmental process;GO:0009605//response to external stimulus;GO:0048519//negative regulation of biological process;GO:0044707//single-multicellular organism process;GO:0051495//positive regulation of cytoskeleton organization;GO:0032231//regulation of actin filament bundle assembly;GO:0002253//activation of immune resp…
TCONS_00072468	543.743	92.8467	24.9067	2.33333	-3.41607	3.90249e-05	0.00167341	yes	ELN	XP_014959394.1 PREDICTED: elastin isoform X1 [Ovis aries]	Organismal Systems	Digestive system	ko04974//Protein digestion and absorption	K14211	GO:0044420//extracellular matrix component;GO:0031012//extracellular matrix	-	GO:1902589//single-organism organelle organization;GO:0016043//cellular component organization;GO:0030029//actin filament-based process;GO:0006996//organelle organization;GO:0071822//protein complex subunit organization;GO:0009987//cellular process;GO:0044085//cellular component biogenesis;GO:0044763//single-organism cellular process;GO:0007010//cytoskeleton organization;GO:0043933//macromolecula…
TCONS_00072530	30.6333	0	1.03333	0.001	-10.0131	0.00255644	0.046312	yes	LRWD1	XP_017895885.1 PREDICTED: leucine-rich repeat and WD repeat-containing protein 1 isoform X2 [Capra hircus]	-	-	-	-	GO:0043232//intracellular non-membrane-bounded organelle;GO:0043227//membrane-bounded organelle;GO:0000785//chromatin;GO:0005694//chromosome;GO:0043226//organelle;GO:0043229//intracellular organelle;GO:0005623//cell;GO:0032991//macromolecular complex;GO:0044424//intracellular part;GO:0044422//organelle part;GO:0000792//heterochromatin;GO:0044427//chromosomal part;GO:0043228//non-membrane-bounded …	GO:0036094//small molecule binding;GO:0005488//binding;GO:0097159//organic cyclic compound binding;GO:1901265//nucleoside phosphate binding;GO:0042393//histone binding;GO:1901363//heterocyclic compound binding;GO:0005515//protein binding;GO:0000166//nucleotide binding	GO:0072594//establishment of protein localization to organelle;GO:0034613//cellular protein localization;GO:0009987//cellular process;GO:0033036//macromolecule localization;GO:0008104//protein localization;GO:0051234//establishment of localization;GO:0051179//localization;GO:0045184//establishment of protein localization;GO:0034502//protein localization to chromosome;GO:0051641//cellular localiza…
TCONS_00072555	333.283	0	1.68333	0.001	-10.7171	1.36787e-11	4.64241e-09	yes	CUX1	XP_017895766.1 PREDICTED: protein CASP isoform X2 [Capra hircus]	-	-	-	-	GO:0000139//Golgi membrane;GO:0043231//intracellular membrane-bounded organelle;GO:0016020//membrane;GO:0098588//bounding membrane of organelle;GO:0044446//intracellular organelle part;GO:0043226//organelle;GO:0012505//endomembrane system;GO:0031090//organelle membrane;GO:0031224//intrinsic component of membrane;GO:0044422//organelle part;GO:0005794//Golgi apparatus;GO:0044464//cell part;GO:00057…	GO:0003677//DNA binding;GO:0000981//RNA polymerase II transcription factor activity, sequence-specific DNA binding;GO:0001228//transcriptional activator activity, RNA polymerase II transcription regulatory region sequence-specific binding;GO:0003676//nucleic acid binding;GO:1901363//heterocyclic compound binding;GO:0003700//transcription factor activity, sequence-specific DNA binding;GO:0097159//…	GO:0030154//cell differentiation;GO:0035315//hair cell differentiation;GO:0032501//multicellular organismal process;GO:0044707//single-multicellular organism process;GO:0080090//regulation of primary metabolic process;GO:0050789//regulation of biological process;GO:0009913//epidermal cell differentiation;GO:0048856//anatomical structure development;GO:0006357//regulation of transcription from RNA…
TCONS_00072711	241.017	17.8433	1.51333	0.0633333	-4.57862	0.000705938	0.0171736	yes	TRRAP	XP_017895728.1 PREDICTED: transformation/transcription domain-associated protein isoform X10 [Capra hircus]	-	-	-	-	-	-	-
TCONS_00073151	977.007	0	7.77667	0.001	-12.9249	3.38436e-13	1.75161e-10	yes	ABLIM1	XP_005698564.1 PREDICTED: actin-binding LIM protein 1 isoform X4 [Capra hircus]	Organismal Systems	Development	ko04360//Axon guidance	K07520	GO:0031252//cell leading edge;GO:0043226//organelle;GO:0043228//non-membrane-bounded organelle;GO:0044424//intracellular part;GO:0005622//intracellular;GO:0043229//intracellular organelle;GO:0044464//cell part;GO:0005623//cell;GO:0043232//intracellular non-membrane-bounded organelle;GO:0005856//cytoskeleton	GO:0005488//binding;GO:0043169//cation binding;GO:0005515//protein binding;GO:0046914//transition metal ion binding;GO:0043167//ion binding;GO:0046872//metal ion binding;GO:0008092//cytoskeletal protein binding	GO:0022008//neurogenesis;GO:0065007//biological regulation;GO:0030031//cell projection assembly;GO:0006928//movement of cell or subcellular component;GO:0040011//locomotion;GO:0048666//neuron development;GO:0048731//system development;GO:0044699//single-organism process;GO:0048869//cellular developmental process;GO:2000112//regulation of cellular macromolecule biosynthetic process;GO:0044707//sin…
TCONS_00073307	129.653	9.29333	3.25	0.14	-4.53694	0.000709958	0.0172343	yes	KCNIP2	XP_005225662.1 PREDICTED: Kv channel-interacting protein 2 isoform X7 [Bos taurus]	-	-	-	-	GO:0016020//membrane;GO:1902495//transmembrane transporter complex;GO:0044424//intracellular part;GO:0043234//protein complex;GO:0016021//integral component of membrane;GO:0034703//cation channel complex;GO:1990351//transporter complex;GO:0005622//intracellular;GO:0005623//cell;GO:0098796//membrane protein complex;GO:0031224//intrinsic component of membrane;GO:0034702//ion channel complex;GO:0044…	GO:0005515//protein binding;GO:0005488//binding;GO:0098772//molecular function regulator;GO:0043167//ion binding;GO:0016247//channel regulator activity;GO:0043169//cation binding	GO:0048869//cellular developmental process;GO:0022008//neurogenesis;GO:1902578//single-organism localization;GO:0006810//transport;GO:0048856//anatomical structure development;GO:0032502//developmental process;GO:0051179//localization;GO:0015672//monovalent inorganic cation transport;GO:0044707//single-multicellular organism process;GO:0006812//cation transport;GO:0048666//neuron development;GO:0…
TCONS_00073526	109.667	0	2.46667	0.001	-11.2683	4.08755e-06	0.000242582	yes	FGFBP3	XP_017896624.1 PREDICTED: fibroblast growth factor-binding protein 3 [Capra hircus]	-	-	-	-	-	GO:0019838//growth factor binding;GO:0005515//protein binding;GO:0097367//carbohydrate derivative binding;GO:0005539//glycosaminoglycan binding;GO:0005488//binding	GO:0003013//circulatory system process;GO:0003008//system process;GO:0050794//regulation of cellular process;GO:0043114//regulation of vascular permeability;GO:0010647//positive regulation of cell communication;GO:0010646//regulation of cell communication;GO:0065007//biological regulation;GO:0050789//regulation of biological process;GO:0023056//positive regulation of signaling;GO:0009967//positiv…
TCONS_00073683	262.557	5.56333	3.18667	0.04	-6.3159	3.13874e-06	0.000192963	yes	Jakmip3	XP_017897126.1 PREDICTED: janus kinase and microtubule-interacting protein 3 isoform X3 [Capra hircus]	-	-	-	-	-	GO:0019899//enzyme binding;GO:0005515//protein binding;GO:0005488//binding	-
TCONS_00073986	503.143	0	9.25333	0.001	-13.1758	1.03128e-14	7.65039e-12	yes	ADD3	XP_004020233.1 PREDICTED: gamma-adducin isoform X1 [Ovis aries]	-	-	-	-	GO:0005737//cytoplasm;GO:0005623//cell;GO:0030054//cell junction;GO:0043226//organelle;GO:0043229//intracellular organelle;GO:0044424//intracellular part;GO:0044444//cytoplasmic part;GO:0044464//cell part;GO:0043232//intracellular non-membrane-bounded organelle;GO:0043228//non-membrane-bounded organelle;GO:0005622//intracellular	-	-
TCONS_00074057	0	97.9967	0.001	1.98333	10.9537	0.000414464	0.0113455	yes	TMEM180	XP_017897095.1 PREDICTED: transmembrane protein 180 isoform X2 [Capra hircus]	-	-	-	-	-	-	-
TCONS_00074202	47.6567	0	2.29333	0.001	-11.1632	0.000775547	0.0185041	yes	UBTD1	XP_003994320.1 PREDICTED: ubiquitin domain-containing protein 1 isoform X2 [Felis catus]	-	-	-	-	-	-	-
TCONS_00074725	264.287	45.39	1.54	0.14	-3.45943	0.00218762	0.0412064	yes	PCM1	XP_017897432.1 PREDICTED: pericentriolar material 1 protein isoform X3 [Capra hircus]	-	-	-	-	GO:0044444//cytoplasmic part;GO:0044450//microtubule organizing center part;GO:0032991//macromolecular complex;GO:0005815//microtubule organizing center;GO:0043228//non-membrane-bounded organelle;GO:0031090//organelle membrane;GO:0005856//cytoskeleton;GO:0043227//membrane-bounded organelle;GO:0005737//cytoplasm;GO:0044464//cell part;GO:0044446//intracellular organelle part;GO:0043232//intracellul…	-	GO:0060341//regulation of cellular localization;GO:0044763//single-organism cellular process;GO:0051093//negative regulation of developmental process;GO:0033036//macromolecule localization;GO:0051649//establishment of localization in cell;GO:0050789//regulation of biological process;GO:0048646//anatomical structure formation involved in morphogenesis;GO:0051641//cellular localization;GO:0009987//…
TCONS_00075119	100.67	0	1.17333	0.001	-10.1964	0.000833563	0.0195995	yes	TACC1	XP_017897385.1 PREDICTED: transforming acidic coiled-coil-containing protein 1 isoform X2 [Capra hircus]	-	-	-	-	-	-	-
TCONS_00075345	76.0033	0	0.59	0.001	-9.20457	0.00105429	0.0236405	yes	TENM3	XP_017897595.1 PREDICTED: teneurin-3 isoform X3 [Capra hircus]	-	-	-	-	GO:0005623//cell;GO:0043005//neuron projection;GO:0044425//membrane part;GO:0016020//membrane;GO:0031224//intrinsic component of membrane;GO:0044464//cell part;GO:0097458//neuron part;GO:0042995//cell projection	GO:0005488//binding;GO:0046983//protein dimerization activity;GO:0005515//protein binding	GO:0051128//regulation of cellular component organization;GO:0044699//single-organism process;GO:0098742//cell-cell adhesion via plasma-membrane adhesion molecules;GO:0007155//cell adhesion;GO:0098609//cell-cell adhesion;GO:0050789//regulation of biological process;GO:2000026//regulation of multicellular organismal development;GO:0051960//regulation of nervous system development;GO:0008152//metab…
TCONS_00075841	2958.41	0.39	60.4467	0.00666667	-13.1464	2.21992e-18	4.70518e-15	yes	TBATA	XP_005699210.1 PREDICTED: protein TBATA isoform X1 [Capra hircus]	-	-	-	-	GO:0005737//cytoplasm;GO:0044464//cell part;GO:0005623//cell;GO:0044424//intracellular part;GO:0005622//intracellular;GO:0044444//cytoplasmic part	-	GO:0044699//single-organism process;GO:0019953//sexual reproduction;GO:0048609//multicellular organismal reproductive process;GO:0032501//multicellular organismal process;GO:0032504//multicellular organism reproduction;GO:0051704//multi-organism process;GO:0044763//single-organism cellular process;GO:0044702//single organism reproductive process;GO:0022414//reproductive process;GO:0032502//develo…
TCONS_00075893	59.2333	0	1.18333	0.001	-10.2086	0.000167413	0.00553825	yes	HERC4	XP_014961383.1 PREDICTED: probable E3 ubiquitin-protein ligase HERC4 isoform X6 [Ovis aries musimon]	Genetic Information Processing	Folding, sorting and degradation	ko04120//Ubiquitin mediated proteolysis	K10615	-	GO:0003824//catalytic activity	GO:0044699//single-organism process;GO:0007276//gamete generation;GO:0044702//single organism reproductive process;GO:0019953//sexual reproduction;GO:0051704//multi-organism process;GO:0032501//multicellular organismal process;GO:0044260//cellular macromolecule metabolic process;GO:0044267//cellular protein metabolic process;GO:0048609//multicellular organismal reproductive process;GO:0070647//pr…
TCONS_00075912	533.167	18.85	11.05	0.27	-5.35494	9.96716e-07	7.40632e-05	yes	EGR2	XP_005976623.1 PREDICTED: E3 SUMO-protein ligase EGR2 [Pantholops hodgsonii]	-	-	-	-	GO:0043226//organelle;GO:0043227//membrane-bounded organelle;GO:0005622//intracellular;GO:0044424//intracellular part;GO:0005623//cell;GO:0043229//intracellular organelle;GO:0044464//cell part;GO:0043231//intracellular membrane-bounded organelle	GO:0000975//regulatory region DNA binding;GO:0003824//catalytic activity;GO:0001067//regulatory region nucleic acid binding;GO:0044389//ubiquitin-like protein ligase binding;GO:0005488//binding;GO:0001071//nucleic acid binding transcription factor activity;GO:0043167//ion binding;GO:0003676//nucleic acid binding;GO:0097159//organic cyclic compound binding;GO:1901363//heterocyclic compound binding…	GO:0007399//nervous system development;GO:0008104//protein localization;GO:0044707//single-multicellular organism process;GO:0044238//primary metabolic process;GO:0006464//cellular protein modification process;GO:0044699//single-organism process;GO:0043412//macromolecule modification;GO:0032501//multicellular organismal process;GO:0021545//cranial nerve development;GO:2001141//regulation of RNA b…
TCONS_00076056	85.1667	0	1.26333	0.001	-10.303	1.73272e-05	0.000847509	yes	TARBP1	XP_017897928.1 PREDICTED: probable methyltransferase TARBP1 isoform X3 [Capra hircus]	-	-	-	-	-	GO:0097159//organic cyclic compound binding;GO:0003824//catalytic activity;GO:0016741//transferase activity, transferring one-carbon groups;GO:1901363//heterocyclic compound binding;GO:0005488//binding;GO:0008168//methyltransferase activity;GO:0003676//nucleic acid binding;GO:0016740//transferase activity	GO:0008152//metabolic process;GO:0071704//organic substance metabolic process;GO:0043170//macromolecule metabolic process;GO:0010467//gene expression
TCONS_00076288	381.513	32.1267	5.18667	0.273333	-4.24607	0.00121236	0.0262463	yes	CDHR1	XP_017898133.1 PREDICTED: cadherin-related family member 1 [Capra hircus]	-	-	-	-	GO:0044441//ciliary part;GO:0043227//membrane-bounded organelle;GO:0044425//membrane part;GO:0098588//bounding membrane of organelle;GO:0044463//cell projection part;GO:0043226//organelle;GO:0098589//membrane region;GO:0098590//plasma membrane region;GO:0042995//cell projection;GO:0031090//organelle membrane;GO:0098805//whole membrane;GO:0071944//cell periphery;GO:0005886//plasma membrane;GO:0016…	-	GO:0098742//cell-cell adhesion via plasma-membrane adhesion molecules;GO:0032501//multicellular organismal process;GO:0050953//sensory perception of light stimulus;GO:0007155//cell adhesion;GO:0007600//sensory perception;GO:0050877//neurological system process;GO:0003008//system process;GO:0098609//cell-cell adhesion;GO:0022610//biological adhesion
TCONS_00076609	78.2567	1.07	1.25	0.01	-6.96578	0.00036512	0.0102792	yes	-	XP_014957662.1 PREDICTED: LOW QUALITY PROTEIN: DNA repair protein complementing XP-C cells isoform X1 [Ovis aries]	Genetic Information Processing	Replication and repair	ko03420//Nucleotide excision repair	K10838	GO:0005737//cytoplasm;GO:0016020//membrane;GO:0044424//intracellular part;GO:0005623//cell;GO:0005622//intracellular;GO:0044464//cell part;GO:0044444//cytoplasmic part;GO:0043229//intracellular organelle;GO:0043227//membrane-bounded organelle;GO:0043231//intracellular membrane-bounded organelle;GO:0043226//organelle	GO:0016491//oxidoreductase activity;GO:0005515//protein binding;GO:0016645//oxidoreductase activity, acting on the CH-NH group of donors;GO:0005102//receptor binding;GO:0016647//oxidoreductase activity, acting on the CH-NH group of donors, oxygen as acceptor;GO:0003824//catalytic activity;GO:0005488//binding	GO:0006461//protein complex assembly;GO:0030031//cell projection assembly;GO:0007017//microtubule-based process;GO:0009653//anatomical structure morphogenesis;GO:0044700//single organism signaling;GO:0070286//axonemal dynein complex assembly;GO:1901575//organic substance catabolic process;GO:0044085//cellular component biogenesis;GO:1901565//organonitrogen compound catabolic process;GO:0043623//c…
TCONS_00076940	0	261.627	0.001	0.696667	9.44432	1.1745e-06	8.50032e-05	yes	RYR2	XP_011980520.1 PREDICTED: ryanodine receptor 2 isoform X28 [Ovis aries musimon]	Environmental Information Processing;Organismal Systems	Endocrine system;Circulatory system;Digestive system;Environmental adaptation;Signal transduction	ko04024//cAMP signaling pathway;ko04020//Calcium signaling pathway;ko04921//Oxytocin signaling pathway;ko04261//Adrenergic signaling in cardiomyocytes;ko04713//Circadian entrainment;ko04972//Pancreatic secretion;ko04911//Insulin secretion;ko04260//Cardiac muscle contraction	K04962	GO:0016021//integral component of membrane;GO:0032991//macromolecular complex;GO:0031090//organelle membrane;GO:0043227//membrane-bounded organelle;GO:0044464//cell part;GO:0044422//organelle part;GO:0098588//bounding membrane of organelle;GO:0044444//cytoplasmic part;GO:0043234//protein complex;GO:0044446//intracellular organelle part;GO:0043229//intracellular organelle;GO:0042175//nuclear outer…	GO:0005515//protein binding;GO:0005215//transporter activity;GO:0005217//intracellular ligand-gated ion channel activity;GO:0099604//ligand-gated calcium channel activity;GO:0019899//enzyme binding;GO:0097159//organic cyclic compound binding;GO:0099600//transmembrane receptor activity;GO:0022890//inorganic cation transmembrane transporter activity;GO:0022834//ligand-gated channel activity;GO:0022…	GO:0050848//regulation of calcium-mediated signaling;GO:1903649//regulation of cytoplasmic transport;GO:0060341//regulation of cellular localization;GO:0060047//heart contraction;GO:0048644//muscle organ morphogenesis;GO:0019222//regulation of metabolic process;GO:0010647//positive regulation of cell communication;GO:0009967//positive regulation of signal transduction;GO:0003008//system process;G…
TCONS_00077243	155.94	0	0.683333	0.001	-9.41645	1.52958e-05	0.000762394	yes	TENM4	XP_011985819.1 PREDICTED: teneurin-4 isoform X5 [Ovis aries musimon]	-	-	-	-	GO:0005622//intracellular;GO:0042995//cell projection;GO:0043226//organelle;GO:0016020//membrane;GO:0044425//membrane part;GO:0044464//cell part;GO:0043229//intracellular organelle;GO:0044424//intracellular part;GO:0043231//intracellular membrane-bounded organelle;GO:0005623//cell;GO:0043227//membrane-bounded organelle;GO:0016021//integral component of membrane;GO:0031224//intrinsic component of …	GO:0005488//binding;GO:0005515//protein binding;GO:0046983//protein dimerization activity	GO:0044085//cellular component biogenesis;GO:0051960//regulation of nervous system development;GO:0016043//cellular component organization;GO:0051239//regulation of multicellular organismal process;GO:0048646//anatomical structure formation involved in morphogenesis;GO:0033002//muscle cell proliferation;GO:0014855//striated muscle cell proliferation;GO:0044238//primary metabolic process;GO:004516…
TCONS_00077291	662.883	3.86	11.9267	0.0466667	-7.99758	3.4232e-11	1.02531e-08	yes	E2F8	XP_005699576.2 PREDICTED: transcription factor E2F8 [Capra hircus]	-	-	-	-	GO:0044464//cell part;GO:0005622//intracellular;GO:0043231//intracellular membrane-bounded organelle;GO:0043234//protein complex;GO:0043229//intracellular organelle;GO:0043227//membrane-bounded organelle;GO:0044424//intracellular part;GO:0043226//organelle;GO:0032991//macromolecular complex;GO:0005623//cell	GO:0005488//binding;GO:0003676//nucleic acid binding;GO:0097159//organic cyclic compound binding;GO:0001067//regulatory region nucleic acid binding;GO:0046983//protein dimerization activity;GO:0000976//transcription regulatory region sequence-specific DNA binding;GO:0003712//transcription cofactor activity;GO:0044212//transcription regulatory region DNA binding;GO:0005515//protein binding;GO:0001…	GO:0048608//reproductive structure development;GO:0072358//cardiovascular system development;GO:0032502//developmental process;GO:0048869//cellular developmental process;GO:0051252//regulation of RNA metabolic process;GO:0044763//single-organism cellular process;GO:0001944//vasculature development;GO:0045786//negative regulation of cell cycle;GO:0032501//multicellular organismal process;GO:003132…
TCONS_00077513	363.733	14.58	7.88333	0.223333	-5.14154	0.000167479	0.00553825	yes	CD6	XP_017898994.1 PREDICTED: T-cell differentiation antigen CD6 isoform X6 [Capra hircus]	Environmental Information Processing	Signaling molecules and interaction	ko04514//Cell adhesion molecules (CAMs)	K06456	-	-	GO:0051179//localization;GO:0051234//establishment of localization;GO:0006810//transport;GO:0016192//vesicle-mediated transport;GO:0006897//endocytosis
TCONS_00077675	744.6	0	9.52333	0.001	-13.2173	7.12308e-16	7.37322e-13	yes	CCDC88B	XP_017899027.1 PREDICTED: coiled-coil domain-containing protein 88B [Capra hircus]	-	-	-	-	-	-	-
[truncated: 1,963 more rows]
