# Supplementary material for: Transcriptome analysis reveals potential immune function-related regulatory genes/pathways of female Lubo goat submandibular glands at different developmental stages
Source: PeerJ. 2020 Oct 7;8:e9947. doi: 10.7717/peerj.9947 (PMC7547598; doi:10.7717/peerj.9947)
Supplement: Table S5 — 3-L, B4-L, B5-L were the samples for goats of 12-month-old (group B ), C2-L, C3-L, C5-L were the samples for goats of 24-month-old (group C). [file peerj-08-9947-s005.xlsx]

## Sheet: peerj-45161-Table_S6
id	B_count	C_count	B_fpkm	C_fpkm	log2(FC)	Pvalue	FDR	significant	Symbol	Description	KEGG_A_class	KEGG_B_class	Pathway	K_ID	GO Component	GO Function	GO Process
TCONS_00002609	420.657	0.113333	2.00667	0.001	-10.9706	2.50933e-05	0.0254684	yes	NAALADL2	XP_005675353.2 PREDICTED: inactive N-acetylated-alpha-linked acidic dipeptidase-like protein 2 isoform X1 [Capra hircus]	-	-	-	-	-	-	-
TCONS_00018265	705.443	0	7.85	0.001	-12.9385	4.52378e-06	0.00734644	yes	OVOS2	XP_017904606.1 PREDICTED: LOW QUALITY PROTEIN: ovostatin homolog 2 [Capra hircus]	-	-	-	-	GO:0005576//extracellular region;GO:0044421//extracellular region part	-	GO:0080090//regulation of primary metabolic process;GO:0050790//regulation of catalytic activity;GO:0044092//negative regulation of molecular function;GO:0052547//regulation of peptidase activity;GO:0048519//negative regulation of biological process;GO:0010466//negative regulation of peptidase activity;GO:0051346//negative regulation of hydrolase activity;GO:0045861//negative regulation of proteo…
TCONS_00023552	509.633	0	2.33	0.001	-11.1861	1.31964e-06	0.00368163	yes	LNPEP	XP_017905501.1 PREDICTED: leucyl-cystinyl aminopeptidase isoform X1 [Capra hircus]	Organismal Systems	Endocrine system	ko04614//Renin-angiotensin system	K01257	GO:0098588//bounding membrane of organelle;GO:0005737//cytoplasm;GO:0043229//intracellular organelle;GO:0005623//cell;GO:0031090//organelle membrane;GO:0043226//organelle;GO:0044464//cell part;GO:0044422//organelle part;GO:0098805//whole membrane;GO:0044437//vacuolar part;GO:0044446//intracellular organelle part;GO:0016020//membrane;GO:0044424//intracellular part;GO:0005773//vacuole;GO:0005774//v…	GO:0070011//peptidase activity, acting on L-amino acid peptides;GO:0003824//catalytic activity;GO:0016787//hydrolase activity;GO:0046872//metal ion binding;GO:0043169//cation binding;GO:0008233//peptidase activity;GO:0005488//binding;GO:0043167//ion binding;GO:0046914//transition metal ion binding	GO:0007165//signal transduction;GO:0019538//protein metabolic process;GO:0044238//primary metabolic process;GO:0050794//regulation of cellular process;GO:0043170//macromolecule metabolic process;GO:0044700//single organism signaling;GO:0051716//cellular response to stimulus;GO:0009057//macromolecule catabolic process;GO:0044699//single-organism process;GO:0008152//metabolic process;GO:0071704//or…
TCONS_00023921	208.723	0	17.0433	0.001	-14.0569	8.18043e-09	5.75671e-05	yes	-	XP_011968688.1 PREDICTED: double-headed protease inhibitor, submandibular gland-like [Ovis aries musimon]	-	-	-	-	-	-	-
TCONS_00028627	284.167	0	2.47667	0.001	-11.2742	7.69399e-06	0.0104795	yes	CDK19	XP_010854909.1 PREDICTED: cyclin-dependent kinase 19 isoform X2 [Bison bison bison]	-	-	-	-	-	GO:0001882//nucleoside binding;GO:0016772//transferase activity, transferring phosphorus-containing groups;GO:0097367//carbohydrate derivative binding;GO:0097159//organic cyclic compound binding;GO:0036094//small molecule binding;GO:0004674//protein serine/threonine kinase activity;GO:1901363//heterocyclic compound binding;GO:0016773//phosphotransferase activity, alcohol group as acceptor;GO:0001…	GO:0006796//phosphate-containing compound metabolic process;GO:0006793//phosphorus metabolic process;GO:0071704//organic substance metabolic process;GO:0006464//cellular protein modification process;GO:0044237//cellular metabolic process;GO:0043170//macromolecule metabolic process;GO:0044763//single-organism cellular process;GO:0044238//primary metabolic process;GO:0043412//macromolecule modifica…
TCONS_00029879	100.093	0	1.28667	0.001	-10.3294	5.00353e-05	0.0414243	yes	EPB41L2	XP_017908705.1 PREDICTED: band 4.1-like protein 2 isoform X7 [Capra hircus]	Cellular Processes	Cellular commiunity	ko04530//Tight junction	K06107	GO:0031982//vesicle;GO:0044425//membrane part;GO:0043227//membrane-bounded organelle;GO:0043228//non-membrane-bounded organelle;GO:0043229//intracellular organelle;GO:0043226//organelle;GO:0044424//intracellular part;GO:0032991//macromolecular complex;GO:0005623//cell;GO:0043232//intracellular non-membrane-bounded organelle;GO:0043234//protein complex;GO:0005912//adherens junction;GO:0031988//mem…	GO:0019904//protein domain specific binding;GO:0005515//protein binding;GO:0005488//binding	GO:1902589//single-organism organelle organization;GO:0009987//cellular process;GO:0044763//single-organism cellular process;GO:0006996//organelle organization;GO:0007010//cytoskeleton organization;GO:0044699//single-organism process;GO:0030036//actin cytoskeleton organization;GO:0016043//cellular component organization;GO:0030029//actin filament-based process;GO:0071840//cellular component organ…
TCONS_00030683	200.083	0.0233333	1.00333	0.001	-9.97059	3.66422e-09	3.86786e-05	yes	CCDC177	XP_017909527.1 PREDICTED: coiled-coil domain-containing protein 177 [Capra hircus]	-	-	-	-	-	-	-
TCONS_00033256	0	314.94	0.001	5.13	12.3247	1.78678e-05	0.0203901	yes	CHP1	NP_001069044.1 calcineurin B homologous protein 1 [Bos taurus]	-	-	-	-	GO:0030054//cell junction;GO:0016023//cytoplasmic, membrane-bounded vesicle;GO:0005623//cell;GO:0044424//intracellular part;GO:0044422//organelle part;GO:0030055//cell-substrate junction;GO:0044444//cytoplasmic part;GO:0031988//membrane-bounded vesicle;GO:0043229//intracellular organelle;GO:0044464//cell part;GO:0005924//cell-substrate adherens junction;GO:0043227//membrane-bounded organelle;GO:0…	GO:0019887//protein kinase regulator activity;GO:0016247//channel regulator activity;GO:0098772//molecular function regulator;GO:0005515//protein binding;GO:0015631//tubulin binding;GO:0019899//enzyme binding;GO:0046872//metal ion binding;GO:0008092//cytoskeletal protein binding;GO:0019207//kinase regulator activity;GO:0043169//cation binding;GO:0005488//binding;GO:0043167//ion binding;GO:0030234…	GO:0006026//aminoglycan catabolic process;GO:0002028//regulation of sodium ion transport;GO:0010556//regulation of macromolecule biosynthetic process;GO:0023051//regulation of signaling;GO:0031647//regulation of protein stability;GO:0043170//macromolecule metabolic process;GO:2001141//regulation of RNA biosynthetic process;GO:1901136//carbohydrate derivative catabolic process;GO:1903320//regulati…
TCONS_00035350	133.047	0	0.82	0.001	-9.67948	1.79674e-06	0.00439203	yes	MBOAT2	XP_017911178.1 PREDICTED: lysophospholipid acyltransferase 2 [Capra hircus]	Metabolism	Lipid metabolism;Global and Overview	ko01100//Metabolic pathways;ko00564//Glycerophospholipid metabolism;ko01110//Biosynthesis of secondary metabolites;ko00561//Glycerolipid metabolism	K13517	GO:0016020//membrane;GO:0031224//intrinsic component of membrane;GO:0044425//membrane part	-	-
TCONS_00039166	110.317	0	1.14	0.001	-10.1548	5.80467e-06	0.0084514	yes	NAA16	XP_017912292.1 PREDICTED: N-alpha-acetyltransferase 16, NatA auxiliary subunit isoform X6 [Capra hircus]	-	-	-	-	GO:0031988//membrane-bounded vesicle;GO:0005622//intracellular;GO:0031248//protein acetyltransferase complex;GO:0043226//organelle;GO:0005623//cell;GO:0032991//macromolecular complex;GO:1902493//acetyltransferase complex;GO:0031414//N-terminal protein acetyltransferase complex;GO:0005737//cytoplasm;GO:1902494//catalytic complex;GO:0043227//membrane-bounded organelle;GO:0044464//cell part;GO:19902…	GO:0043021//ribonucleoprotein complex binding;GO:0044877//macromolecular complex binding;GO:0005488//binding;GO:0003824//catalytic activity	GO:0065008//regulation of biological quality;GO:0042981//regulation of apoptotic process;GO:0031647//regulation of protein stability;GO:0043067//regulation of programmed cell death;GO:0050789//regulation of biological process;GO:0010941//regulation of cell death;GO:0050794//regulation of cellular process;GO:0065007//biological regulation
TCONS_00040183	102.983	0	1.61333	0.001	-10.6558	3.56769e-05	0.0327475	yes	TAF4	DAA23387.1 TPA: TAF4 RNA polymerase II, TATA box binding protein (TBP)-associated factor, 135kDa [Bos taurus]	Genetic Information Processing	Transcription	ko03022//Basal transcription factors	K03129	GO:0031981//nuclear lumen;GO:0044446//intracellular organelle part;GO:0043231//intracellular membrane-bounded organelle;GO:1990234//transferase complex;GO:0070461//SAGA-type complex;GO:0035097//histone methyltransferase complex;GO:0070013//intracellular organelle lumen;GO:0032991//macromolecular complex;GO:0043229//intracellular organelle;GO:0044422//organelle part;GO:0005623//cell;GO:0044665//ML…	GO:0005515//protein binding;GO:0003676//nucleic acid binding;GO:0046983//protein dimerization activity;GO:0005488//binding;GO:0097159//organic cyclic compound binding;GO:1901363//heterocyclic compound binding	GO:0032774//RNA biosynthetic process;GO:1903506//regulation of nucleic acid-templated transcription;GO:0031326//regulation of cellular biosynthetic process;GO:0006355//regulation of transcription, DNA-templated;GO:0000003//reproduction;GO:0048513//animal organ development;GO:0051252//regulation of RNA metabolic process;GO:0071704//organic substance metabolic process;GO:1901360//organic cyclic com…
TCONS_00043270	412.937	0	2.79	0.001	-11.446	6.959e-16	2.9383e-11	yes	OGFRL1	XP_017914318.1 PREDICTED: opioid growth factor receptor-like protein 1 isoform X2 [Capra hircus]	-	-	-	-	-	-	-
TCONS_00053007	95.2233	0	1.89	0.001	-10.8842	2.53339e-05	0.0254684	yes	APLP1	XP_017918808.1 PREDICTED: amyloid-like protein 1 isoform X2 [Capra hircus]	-	-	-	-	GO:0044424//intracellular part;GO:0044464//cell part;GO:0043229//intracellular organelle;GO:0005737//cytoplasm;GO:0016020//membrane;GO:0043226//organelle;GO:0043231//intracellular membrane-bounded organelle;GO:0044425//membrane part;GO:0044444//cytoplasmic part;GO:0005622//intracellular;GO:0043227//membrane-bounded organelle;GO:0031224//intrinsic component of membrane;GO:0005623//cell	GO:0097367//carbohydrate derivative binding;GO:0043169//cation binding;GO:0001664//G-protein coupled receptor binding;GO:0005515//protein binding;GO:0043167//ion binding;GO:0046872//metal ion binding;GO:0005102//receptor binding;GO:0031690//adrenergic receptor binding;GO:0005488//binding;GO:0005539//glycosaminoglycan binding	GO:0070887//cellular response to chemical stimulus;GO:0034641//cellular nitrogen compound metabolic process;GO:0019222//regulation of metabolic process;GO:0030808//regulation of nucleotide biosynthetic process;GO:0030799//regulation of cyclic nucleotide metabolic process;GO:0071407//cellular response to organic cyclic compound;GO:0032502//developmental process;GO:0071867//response to monoamine;GO…
TCONS_00054858	122.823	0	0.436667	0.001	-8.77039	2.53823e-06	0.0054985	yes	ZNF792	XP_017918822.1 PREDICTED: zinc finger protein 792 isoform X1 [Capra hircus]	-	-	-	-	GO:0005623//cell;GO:0044464//cell part	GO:0043169//cation binding;GO:0043167//ion binding;GO:0005488//binding	GO:0050789//regulation of biological process;GO:0010468//regulation of gene expression;GO:0065007//biological regulation;GO:0019222//regulation of metabolic process;GO:0060255//regulation of macromolecule metabolic process
TCONS_00059874	0.0566667	739.213	0.001	12.68	13.6303	3.35624e-15	7.08552e-11	yes	SMARCD2	XP_005976262.1 PREDICTED: SWI/SNF-related matrix-associated actin-dependent regulator of chromatin subfamily D member 2 [Pantholops hodgsonii]	-	-	-	-	-	-	-
TCONS_00073151	373.123	0	2.55667	0.001	-11.32	7.24035e-13	1.01903e-08	yes	ABLIM1	XP_005698564.1 PREDICTED: actin-binding LIM protein 1 isoform X4 [Capra hircus]	Organismal Systems	Development	ko04360//Axon guidance	K07520	GO:0031252//cell leading edge;GO:0043226//organelle;GO:0043228//non-membrane-bounded organelle;GO:0044424//intracellular part;GO:0005622//intracellular;GO:0043229//intracellular organelle;GO:0044464//cell part;GO:0005623//cell;GO:0043232//intracellular non-membrane-bounded organelle;GO:0005856//cytoskeleton	GO:0005488//binding;GO:0043169//cation binding;GO:0005515//protein binding;GO:0046914//transition metal ion binding;GO:0043167//ion binding;GO:0046872//metal ion binding;GO:0008092//cytoskeletal protein binding	GO:0022008//neurogenesis;GO:0065007//biological regulation;GO:0030031//cell projection assembly;GO:0006928//movement of cell or subcellular component;GO:0040011//locomotion;GO:0048666//neuron development;GO:0048731//system development;GO:0044699//single-organism process;GO:0048869//cellular developmental process;GO:2000112//regulation of cellular macromolecule biosynthetic process;GO:0044707//sin…
TCONS_00078658	0	135.39	0.001	1.09	10.0901	4.05689e-06	0.00713726	yes	ZBTB3	ELR49706.1 Zinc finger and BTB domain-containing protein 3, partial [Bos mutus]	-	-	-	-	GO:0043231//intracellular membrane-bounded organelle;GO:0005622//intracellular;GO:0043227//membrane-bounded organelle;GO:0044464//cell part;GO:0044424//intracellular part;GO:0043229//intracellular organelle;GO:0005623//cell;GO:0043226//organelle	GO:0043169//cation binding;GO:0005488//binding;GO:0043167//ion binding	-
TCONS_00080159	703.867	22.05	9.37	0.246667	-5.24741	6.1218e-06	0.00861603	yes	MSN	XP_005700910.1 PREDICTED: moesin [Capra hircus]	Cellular Processes;Organismal Systems	Cell motility;Immune system	ko04810//Regulation of actin cytoskeleton;ko04670//Leukocyte transendothelial migration	K05763	GO:0031988//membrane-bounded vesicle;GO:0005886//plasma membrane;GO:0043227//membrane-bounded organelle;GO:0016020//membrane;GO:0005622//intracellular;GO:0043228//non-membrane-bounded organelle;GO:0005576//extracellular region;GO:0030055//cell-substrate junction;GO:0044464//cell part;GO:0044425//membrane part;GO:0031982//vesicle;GO:0005912//adherens junction;GO:0042995//cell projection;GO:0030054…	GO:1901363//heterocyclic compound binding;GO:0003723//RNA binding;GO:0019899//enzyme binding;GO:0005515//protein binding;GO:0097159//organic cyclic compound binding;GO:0003676//nucleic acid binding;GO:0019900//kinase binding;GO:0008092//cytoskeletal protein binding;GO:0005488//binding	GO:0050789//regulation of biological process;GO:0001885//endothelial cell development;GO:0002064//epithelial cell development;GO:0003158//endothelium development;GO:0044767//single-organism developmental process;GO:0030154//cell differentiation;GO:0009888//tissue development;GO:0032879//regulation of localization;GO:0045446//endothelial cell differentiation;GO:0071704//organic substance metabolic…
TCONS_00082760	182.017	0	2.69667	0.001	-11.397	3.35676e-07	0.00128848	yes	DGCR2	XP_017900312.1 PREDICTED: integral membrane protein DGCR2/IDD isoform X3 [Capra hircus]	-	-	-	-	-	-	-
XM_005691048.3	94.12	0	1.71667	0.001	-10.7454	3.02484e-05	0.0290267	yes	ncbi_102170257	PREDICTED: complement factor H-related protein 5 isoform X1 [Capra hircus]	Human Diseases;Organismal Systems	Infectious diseases;Immune system	ko04610//Complement and coagulation cascades;ko05150//Staphylococcus aureus infection	K04004	GO:0043226//organelle;GO:0031988//membrane-bounded vesicle;GO:0005576//extracellular region;GO:0044421//extracellular region part;GO:0031982//vesicle;GO:0043227//membrane-bounded organelle	GO:0043167//ion binding;GO:0043168//anion binding;GO:0005488//binding	-
XM_005691461.3	27.5233	1593.05	1.06	52.34	5.62578	1.39512e-06	0.00368163	yes	ncbi_102183897	PREDICTED: phosphatidylethanolamine-binding protein 1 [Ovis aries]	-	-	-	-	GO:0005623//cell;GO:0043226//organelle;GO:0031988//membrane-bounded vesicle;GO:0005622//intracellular;GO:0044464//cell part;GO:0031982//vesicle;GO:0044424//intracellular part;GO:0043229//intracellular organelle;GO:0043227//membrane-bounded organelle;GO:0043231//intracellular membrane-bounded organelle	GO:0032549//ribonucleoside binding;GO:0004857//enzyme inhibitor activity;GO:0005515//protein binding;GO:0019899//enzyme binding;GO:0003723//RNA binding;GO:0001883//purine nucleoside binding;GO:0019900//kinase binding;GO:0001882//nucleoside binding;GO:0036094//small molecule binding;GO:0030234//enzyme regulator activity;GO:0098772//molecular function regulator;GO:0005488//binding;GO:0097159//organ…	GO:0048519//negative regulation of biological process;GO:0032269//negative regulation of cellular protein metabolic process;GO:0044092//negative regulation of molecular function;GO:0065007//biological regulation;GO:0050789//regulation of biological process;GO:0009892//negative regulation of metabolic process;GO:0051336//regulation of hydrolase activity;GO:0019222//regulation of metabolic process;…
XM_005692179.3	120.187	0	1.44	0.001	-10.4919	3.06023e-06	0.00615295	yes	ncbi_102169894	-	-	-	-	-	-	-	-
XM_005694623.3	0.186667	120.727	0.001	0.813333	9.6677	4.0102e-05	0.0352756	yes	ncbi_102168578	PREDICTED: protein LAP2 isoform X1 [Capra hircus]	Organismal Systems	Immune system	ko04621//NOD-like receptor signaling pathway	K12796	GO:0043227//membrane-bounded organelle;GO:0030054//cell junction;GO:0005623//cell;GO:0043226//organelle;GO:0043231//intracellular membrane-bounded organelle;GO:0044424//intracellular part;GO:0043229//intracellular organelle;GO:0016020//membrane;GO:0044464//cell part;GO:0030055//cell-substrate junction;GO:0005622//intracellular	-	GO:0051649//establishment of localization in cell;GO:0015031//protein transport;GO:0006886//intracellular protein transport;GO:0051234//establishment of localization;GO:0051179//localization;GO:0006810//transport;GO:0046907//intracellular transport;GO:0070727//cellular macromolecule localization;GO:0071702//organic substance transport;GO:0033036//macromolecule localization;GO:0045184//establishme…
XM_005694667.3	155.67	0	3.65333	0.001	-11.835	8.0242e-06	0.0105877	yes	ncbi_102181237	-	-	-	-	-	-	-	-
XM_005698466.3	174.503	0	2.28333	0.001	-11.1569	4.15831e-08	0.000195085	yes	ncbi_102174087	-	-	-	-	-	-	-	-
XM_013971802.2	0	166.597	0.001	3.45	11.7524	7.06368e-07	0.00229423	yes	ncbi_102175888	-	-	-	-	-	-	-	-
XM_018039007.1	337.047	8.13667	2.71667	0.0566667	-5.58319	3.36953e-05	0.031616	yes	ncbi_102170099	-	-	-	-	-	-	-	-
XM_018041380.1	143.35	0	1.07667	0.001	-10.0724	5.1944e-07	0.00182769	yes	ncbi_100861357	-	-	-	-	-	-	-	-
XM_018041910.1	0	365	0.001	3.38333	11.7242	1.12131e-05	0.0135271	yes	ncbi_102168885	-	-	-	-	-	-	-	-
XM_018042350.1	231.11	0	2.17667	0.001	-11.0879	2.01616e-05	0.0218278	yes	ncbi_102191113	-	-	-	-	-	-	-	-
XM_018042865.1	186.24	0	2.66667	0.001	-11.3808	2.43085e-08	0.000128297	yes	ncbi_102173818	-	-	-	-	-	-	-	-
XM_018043095.1	0	193.783	0.001	3.96667	11.9537	1.00434e-07	0.000424063	yes	ncbi_102175192	-	-	-	-	-	-	-	-
XM_018046424.1	188.303	0	3.41	0.001	-11.7356	1.44982e-08	8.74513e-05	yes	ncbi_102180172	PREDICTED: UDP-N-acetylhexosamine pyrophosphorylase isoform X1 [Ovis aries]	Metabolism	Carbohydrate metabolism	ko00520//Amino sugar and nucleotide sugar metabolism	K00972	-	GO:0016772//transferase activity, transferring phosphorus-containing groups;GO:0016779//nucleotidyltransferase activity;GO:0003824//catalytic activity;GO:0016740//transferase activity	-
XM_018046443.1	192.663	0	0.78	0.001	-9.60733	4.39911e-05	0.0379069	yes	ncbi_102189357	-	-	-	-	-	-	-	-
XM_018047939.1	219.817	0.01	1.81333	0.001	-10.8244	4.91891e-09	4.15383e-05	yes	ncbi_102189737	-	-	-	-	-	-	-	-
XM_018048196.1	96.9633	0	0.836667	0.001	-9.70851	2.39003e-05	0.0252286	yes	ncbi_102184407	-	-	-	-	-	-	-	-
XM_018048365.1	197.76	1.38333	4.90333	0.0266667	-7.52258	3.81333e-05	0.0342575	yes	ncbi_108636029	PREDICTED: synaptosomal-associated protein 23 isoform X2 [Ovis aries]	Organismal Systems;Genetic Information Processing	Folding, sorting and degradation;Immune system	ko04611//Platelet activation;ko04130//SNARE interactions in vesicular transport	K08508	-	-	-
XM_018049109.1	4287.53	51350	434.877	4522.11	3.37832	4.32628e-06	0.00730675	yes	ncbi_102170599	PREDICTED: basic proline-rich protein-like [Capra hircus]	-	-	-	-	-	-	-
XM_018049507.1	117.41	0	1.79	0.001	-10.8057	4.03386e-06	0.00713726	yes	ncbi_102183497	PREDICTED: centromere protein C isoform X1 [Capra hircus]	-	-	-	-	GO:0043232//intracellular non-membrane-bounded organelle;GO:0043228//non-membrane-bounded organelle;GO:0043231//intracellular membrane-bounded organelle;GO:0000775//chromosome, centromeric region;GO:0000793//condensed chromosome;GO:0044446//intracellular organelle part;GO:0043227//membrane-bounded organelle;GO:0044464//cell part;GO:0043234//protein complex;GO:0000779//condensed chromosome, centro…	GO:1901363//heterocyclic compound binding;GO:0005488//binding;GO:0003677//DNA binding;GO:0097159//organic cyclic compound binding;GO:0043565//sequence-specific DNA binding;GO:0003676//nucleic acid binding	GO:0009987//cellular process;GO:0044763//single-organism cellular process;GO:0000280//nuclear division;GO:0022607//cellular component assembly;GO:0006461//protein complex assembly;GO:0071840//cellular component organization or biogenesis;GO:0071822//protein complex subunit organization;GO:0007049//cell cycle;GO:0016043//cellular component organization;GO:0043623//cellular protein complex assembly…
XM_018050166.1	169.72	0.456667	1.09333	0.00333333	-8.35755	1.87236e-06	0.00439203	yes	ncbi_102183319	PREDICTED: sulfate transporter [Capra hircus]	-	-	-	-	GO:0031224//intrinsic component of membrane;GO:0043226//organelle;GO:0031988//membrane-bounded vesicle;GO:0044425//membrane part;GO:0043227//membrane-bounded organelle;GO:0031982//vesicle;GO:0016020//membrane	GO:0022892//substrate-specific transporter activity;GO:0005215//transporter activity;GO:0015075//ion transmembrane transporter activity;GO:0022891//substrate-specific transmembrane transporter activity;GO:0008509//anion transmembrane transporter activity;GO:0015103//inorganic anion transmembrane transporter activity;GO:0022857//transmembrane transporter activity;GO:0022804//active transmembrane t…	GO:0006820//anion transport;GO:0044765//single-organism transport;GO:0072348//sulfur compound transport;GO:0009987//cellular process;GO:0044699//single-organism process;GO:0051179//localization;GO:0006811//ion transport;GO:0006810//transport;GO:0044763//single-organism cellular process;GO:0015698//inorganic anion transport;GO:0008272//sulfate transport;GO:1902578//single-organism localization;GO:…
XM_018051092.1	0	123.087	0.001	0.93	9.86109	1.09718e-05	0.0135271	yes	ncbi_102186295	-	-	-	-	-	-	-	-
XM_018051135.1	149.21	0.393333	0.796667	0.00333333	-7.90087	4.84713e-05	0.0409321	yes	ncbi_102168996	-	-	-	-	-	-	-	-
XM_018051136.1	0	337.32	0.001	3.25667	11.6692	1.04316e-05	0.013347	yes	ncbi_102168996	-	-	-	-	-	-	-	-
XM_018056055.1	136.59	0	2.02667	0.001	-10.9849	2.6045e-06	0.0054985	yes	ncbi_102187410	-	-	-	-	-	-	-	-
XM_018057276.1	304.817	0.02	2.16333	0.001	-11.079	4.77549e-06	0.00746799	yes	ncbi_102182887	PREDICTED: GDNF-inducible zinc finger protein 1 [Capra hircus]	-	-	-	-	GO:0044464//cell part;GO:0043229//intracellular organelle;GO:0043231//intracellular membrane-bounded organelle;GO:0043226//organelle;GO:0043227//membrane-bounded organelle;GO:0044424//intracellular part;GO:0005623//cell;GO:0005622//intracellular	GO:0043167//ion binding;GO:0043169//cation binding;GO:0001067//regulatory region nucleic acid binding;GO:0003690//double-stranded DNA binding;GO:0097159//organic cyclic compound binding;GO:0001012//RNA polymerase II regulatory region DNA binding;GO:0043565//sequence-specific DNA binding;GO:0005488//binding;GO:0003676//nucleic acid binding;GO:0003700//transcription factor activity, sequence-specif…	GO:0051171//regulation of nitrogen compound metabolic process;GO:0044707//single-multicellular organism process;GO:0050789//regulation of biological process;GO:0035295//tube development;GO:0007275//multicellular organism development;GO:0080090//regulation of primary metabolic process;GO:0044699//single-organism process;GO:0060429//epithelium development;GO:0009888//tissue development;GO:0060562//…
XM_018057459.1	138.02	0.26	1.27	0.00333333	-8.57365	3.63299e-06	0.00697254	yes	ncbi_102172853	-	-	-	-	-	-	-	-
XM_018057586.1	0.01	114.523	0.001	1.35667	10.4059	1.94807e-05	0.0216456	yes	ncbi_108637403	PREDICTED: laminin subunit alpha-5-like [Capra hircus]	Human Diseases;Environmental Information Processing;Cellular Processes	Signal transduction;Infectious diseases;Cancers;Signaling molecules and interaction;Cellular commiunity	ko04151//PI3K-Akt signaling pathway;ko05200//Pathways in cancer;ko04510//Focal adhesion;ko04512//ECM-receptor interaction;ko05145//Toxoplasmosis;ko05146//Amoebiasis;ko05222//Small cell lung cancer	K06240	GO:0005605//basal lamina;GO:0005622//intracellular;GO:0032991//macromolecular complex;GO:0005578//proteinaceous extracellular matrix;GO:0005576//extracellular region;GO:0005623//cell;GO:0044420//extracellular matrix component;GO:0031982//vesicle;GO:0043231//intracellular membrane-bounded organelle;GO:0043226//organelle;GO:0044421//extracellular region part;GO:0043256//laminin complex;GO:0044464//…	GO:0005102//receptor binding;GO:0005515//protein binding;GO:0005488//binding	GO:0032501//multicellular organismal process;GO:0050794//regulation of cellular process;GO:0007166//cell surface receptor signaling pathway;GO:0050896//response to stimulus;GO:0048869//cellular developmental process;GO:0032502//developmental process;GO:0051239//regulation of multicellular organismal process;GO:0044699//single-organism process;GO:0007155//cell adhesion;GO:0065007//biological regul…
XM_018059623.1	96.2067	0	1.47	0.001	-10.5216	1.77524e-05	0.0203901	yes	ncbi_102183617	-	-	-	-	-	-	-	-
XM_018060766.1	96.0267	0	1.18333	0.001	-10.2086	2.83862e-05	0.0278732	yes	ncbi_102188521	-	-	-	-	-	-	-	-
XM_018061393.1	2.76333	272.4	0.0166667	1.32333	6.31107	5.38315e-06	0.0081176	yes	ncbi_102176908	-	-	-	-	-	-	-	-
XM_018062997.1	141.677	0	0.33	0.001	-8.36632	1.02627e-06	0.00309515	yes	ncbi_102180806	-	-	-	-	-	-	-	-
XM_018065176.1	81.76	0	1.75	0.001	-10.7731	6.05614e-05	0.0491747	yes	ncbi_102175893	-	-	-	-	-	-	-	-
